# Supplementary material
Source: PubMed Central journal article supplement (PMC6849094)
Supplement: mmc1.pdf [file mmc1.pdf]

**The American Journal of Human Genetics, Volume 105**

## **Supplemental Data**

### **Evolution and Impact of Subclonal Mutations in Papillary Thyroid Cancer**

**Tariq Masoodi, Abdul K. Siraj, Sarah Siraj, Saud Azam, Zeeshan Qadri, Sandeep K. Parvathareddy, Saif S. Al-Sobhi, Mohammed AlDawish, Fowzan S. Alkuraya, and Khawla S. Al-Kuraya**

429-P

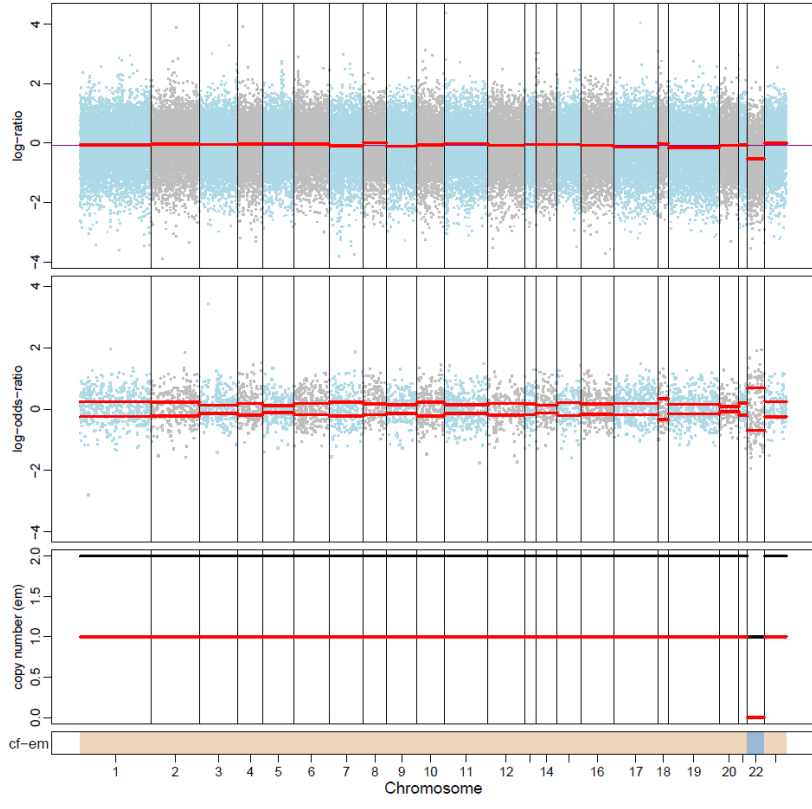

429-P0

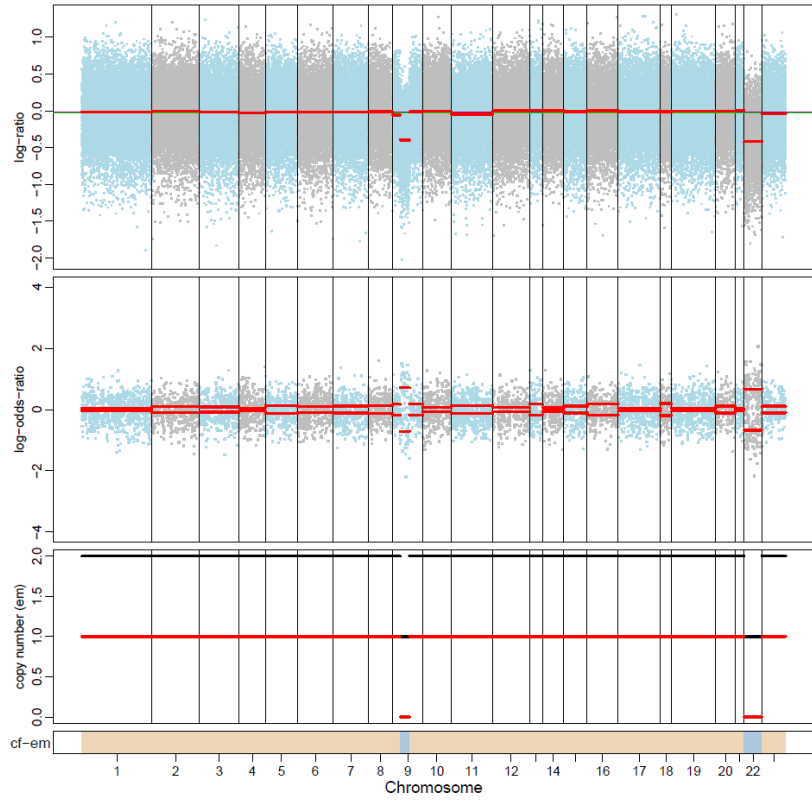

429-P1

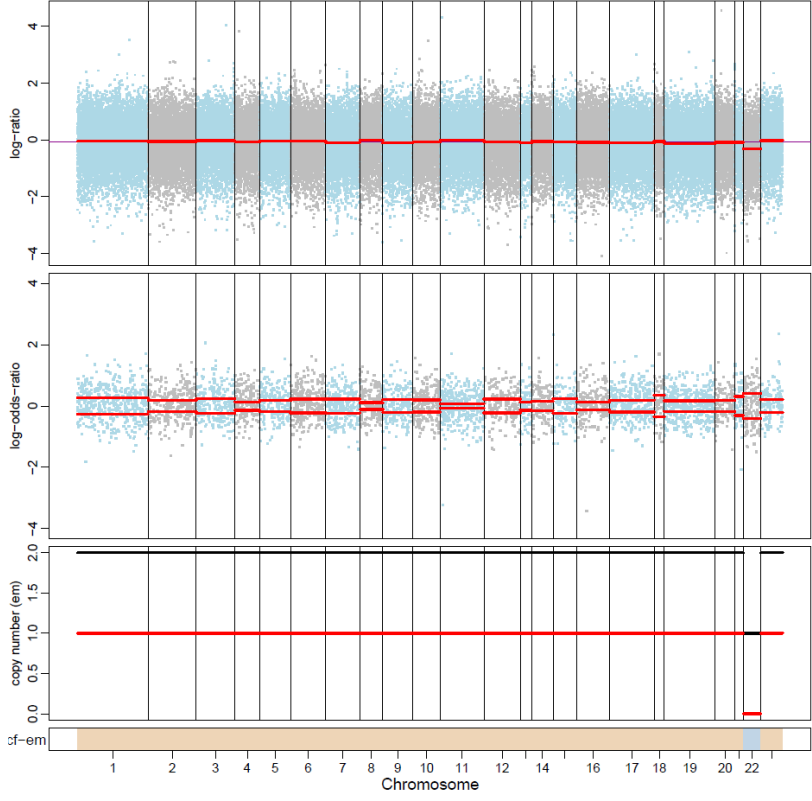

429-P2

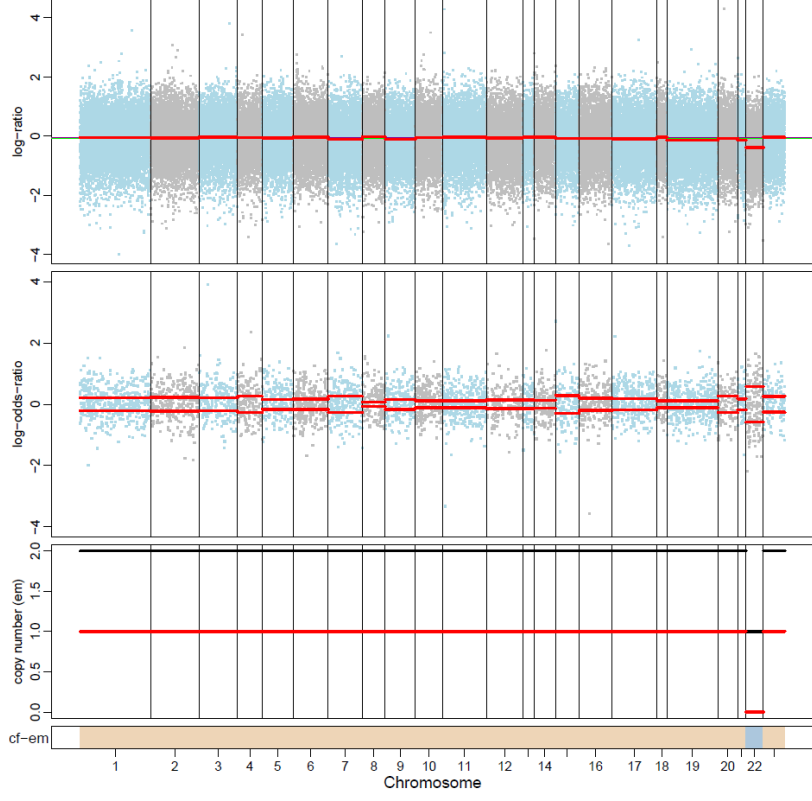

429-P3

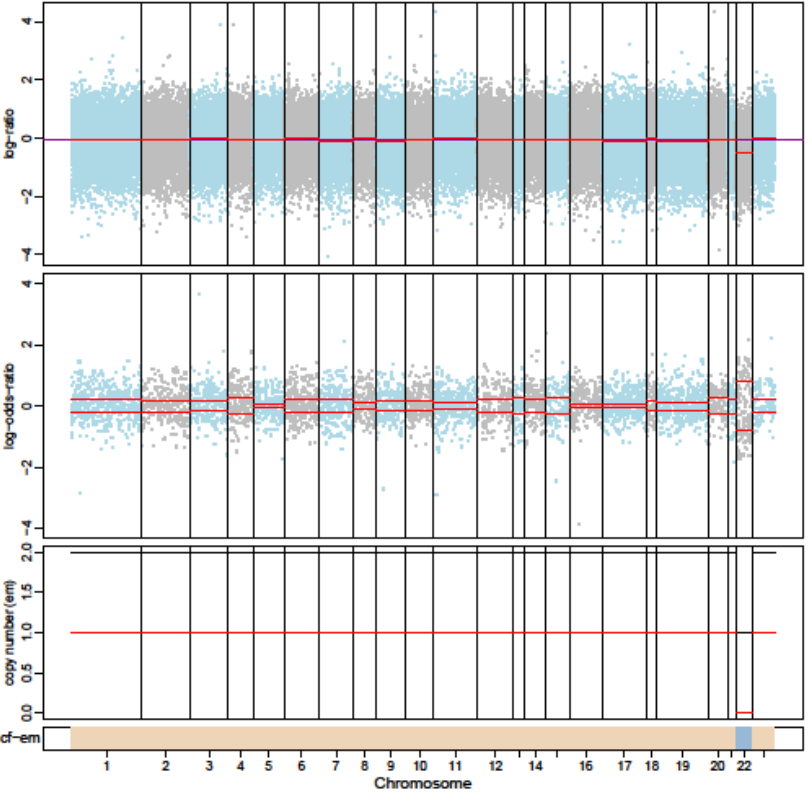

429-LR1

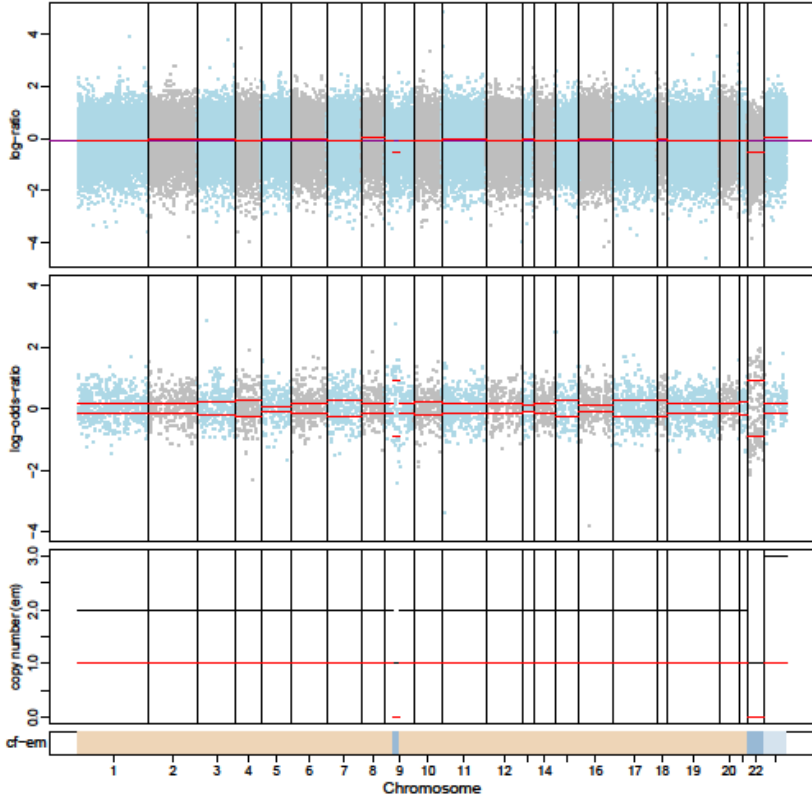

429-LR2

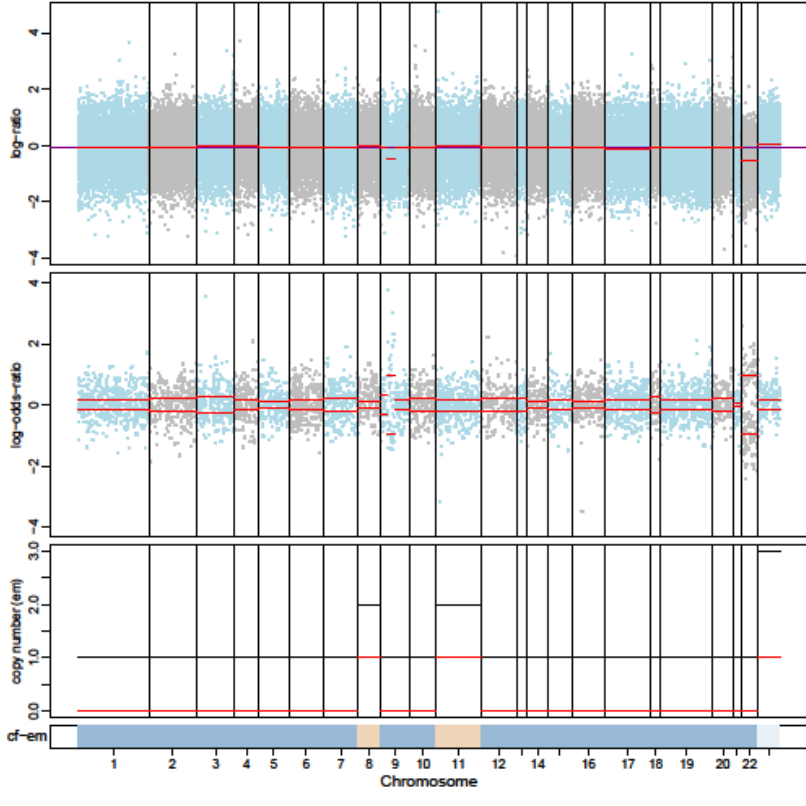

429-LR3

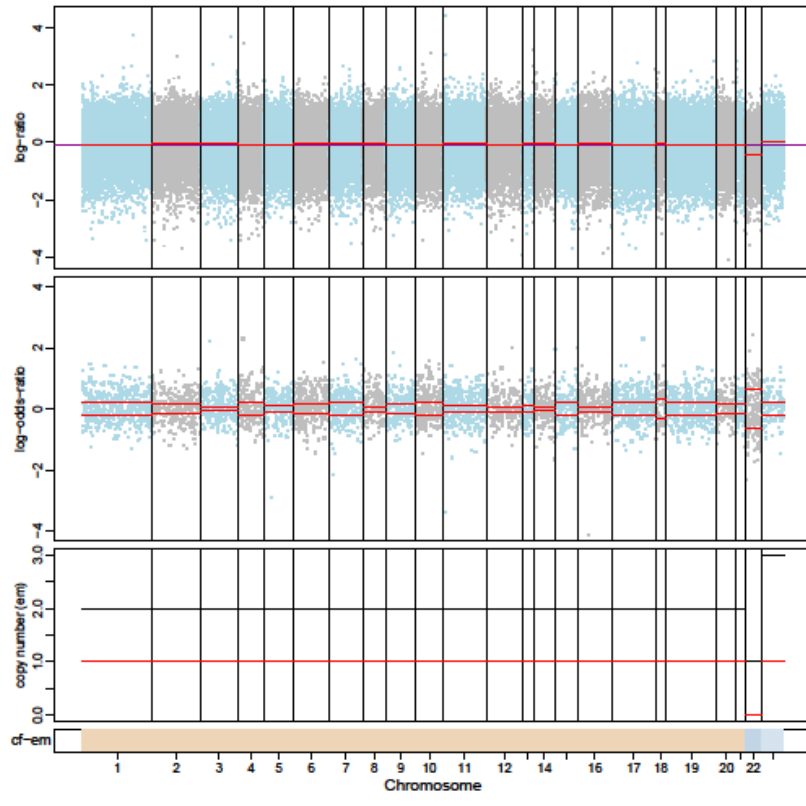

696-P0

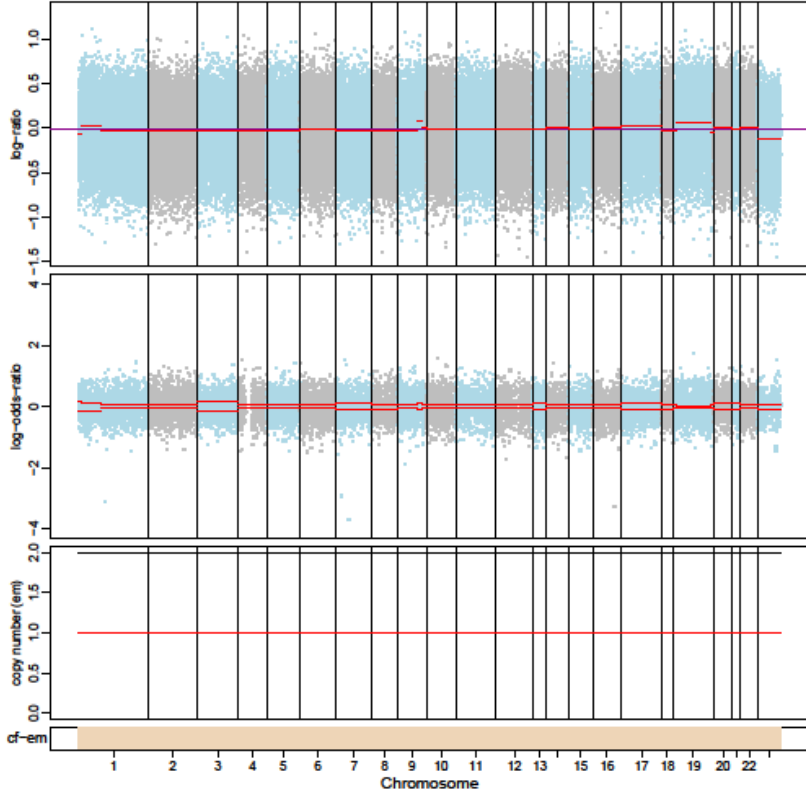

696-P1

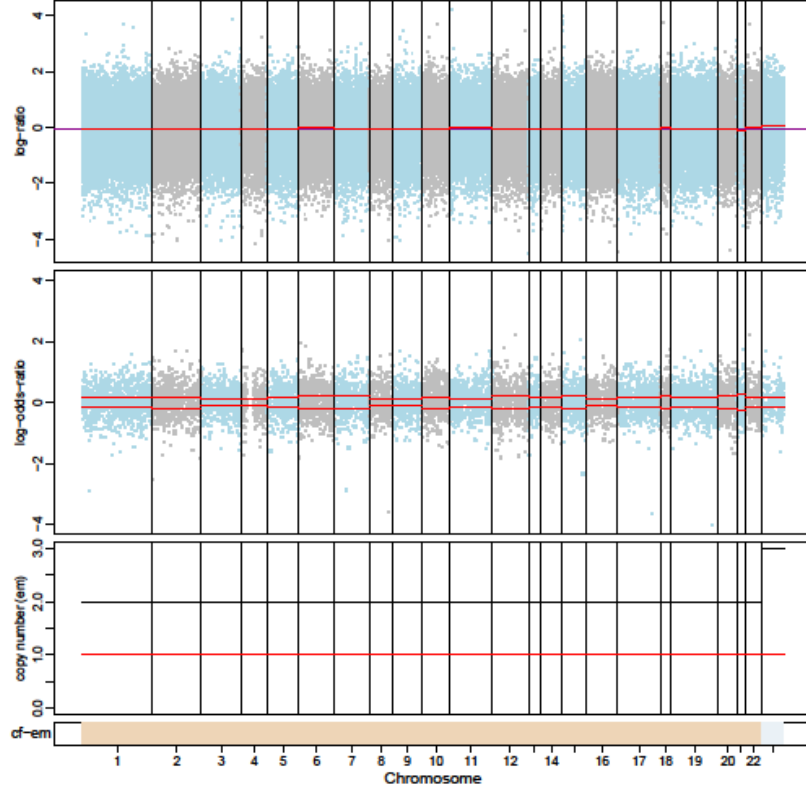

696-P2

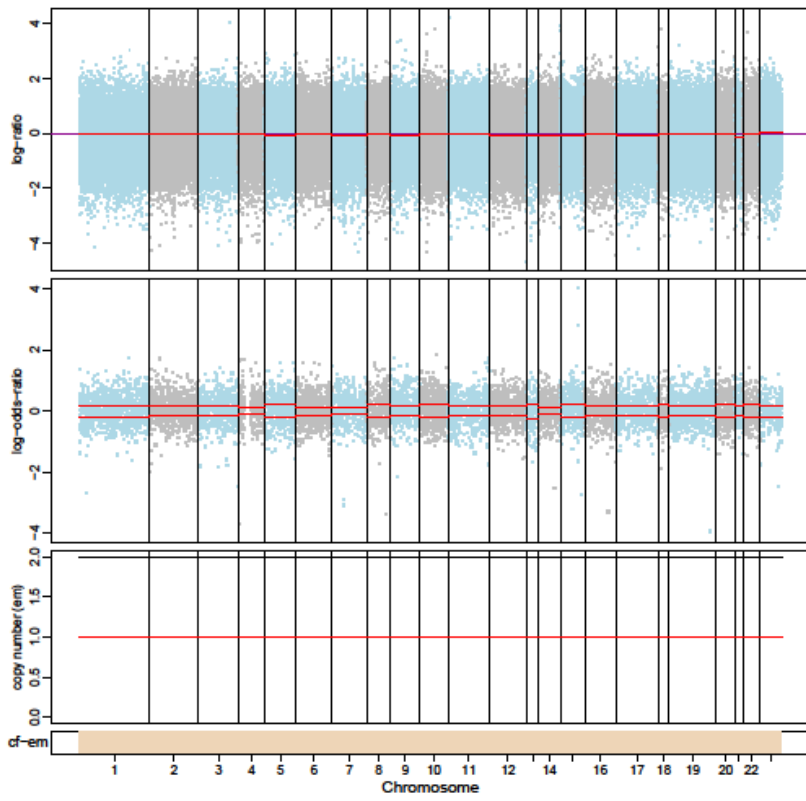

696-P3

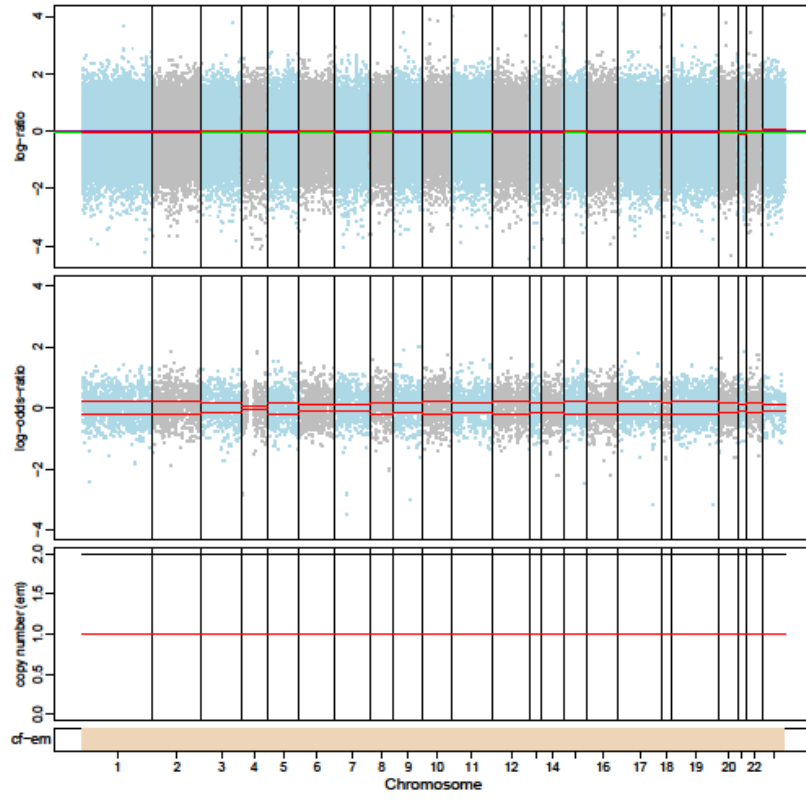

696-P4

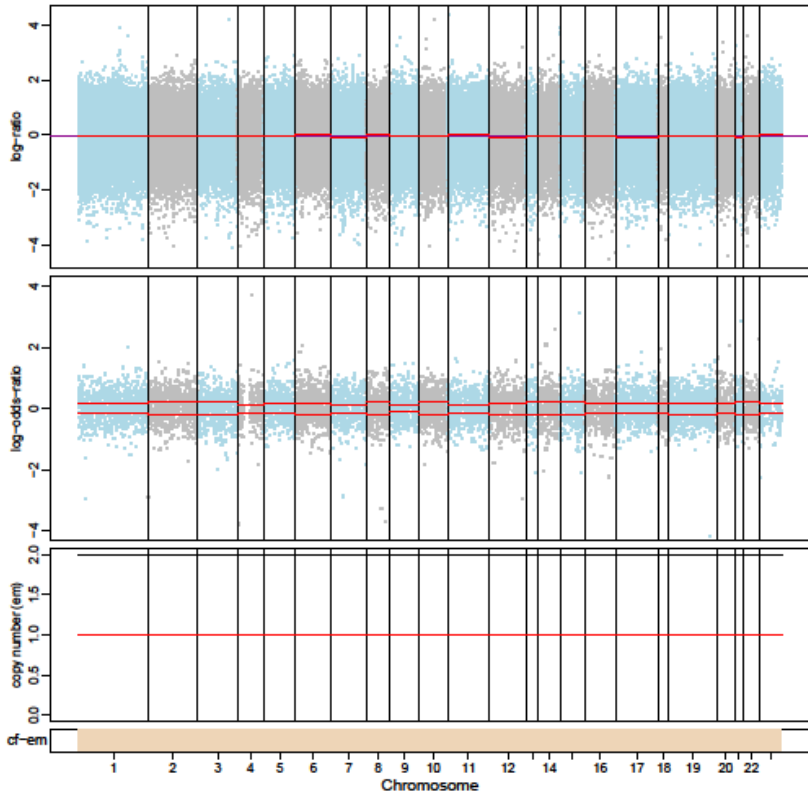

696-LR1

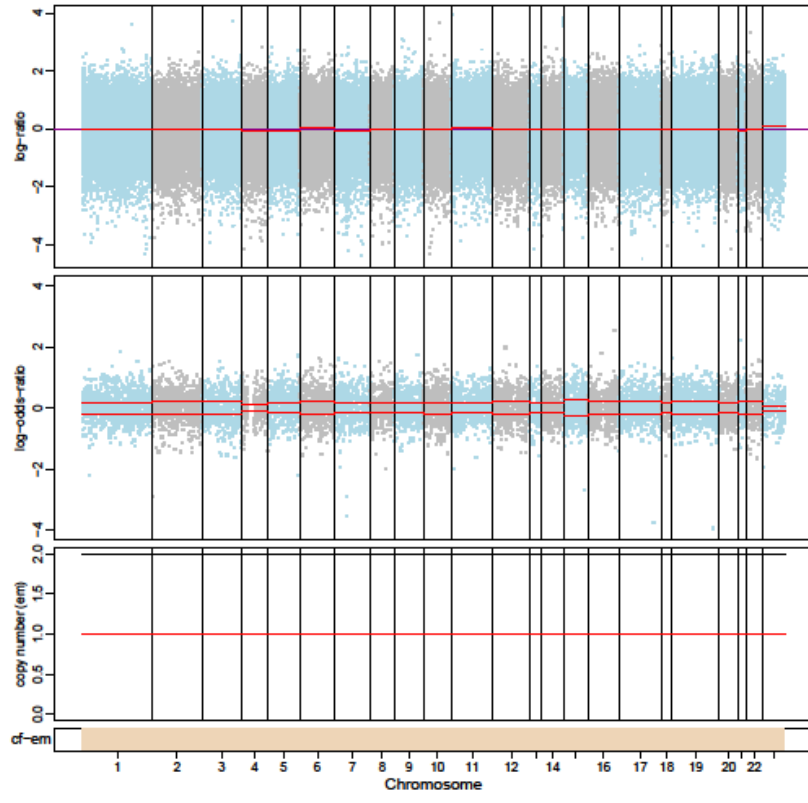

696-LR2

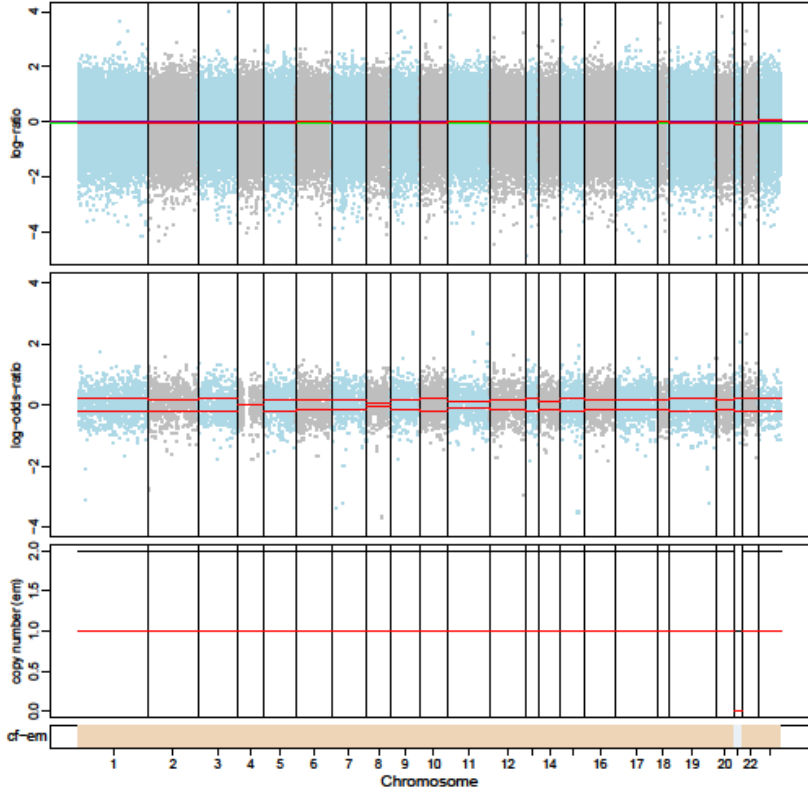

697-P0

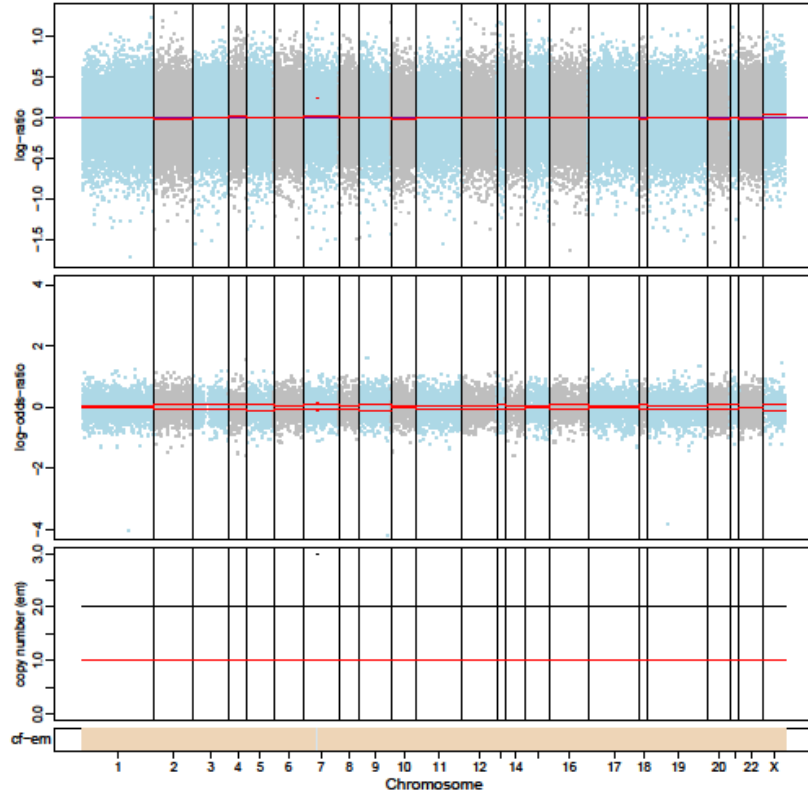

697-P1

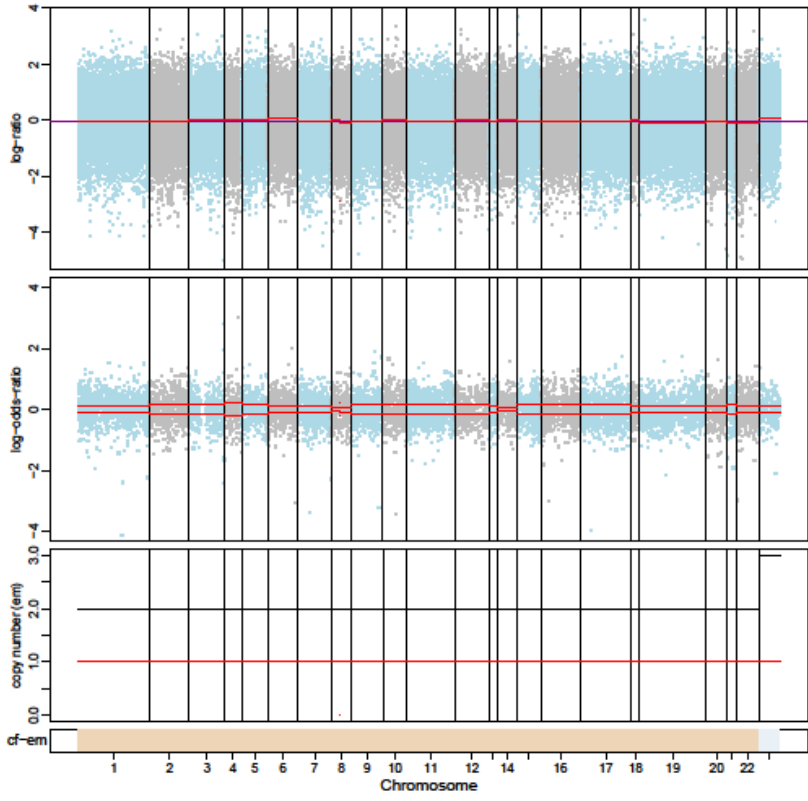

697-P2

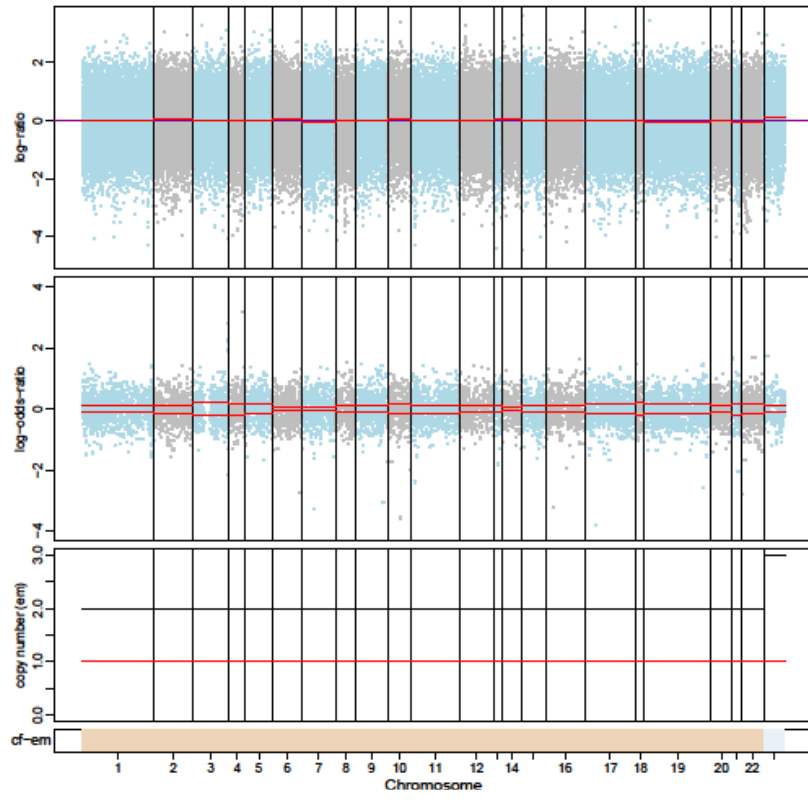

728-P0

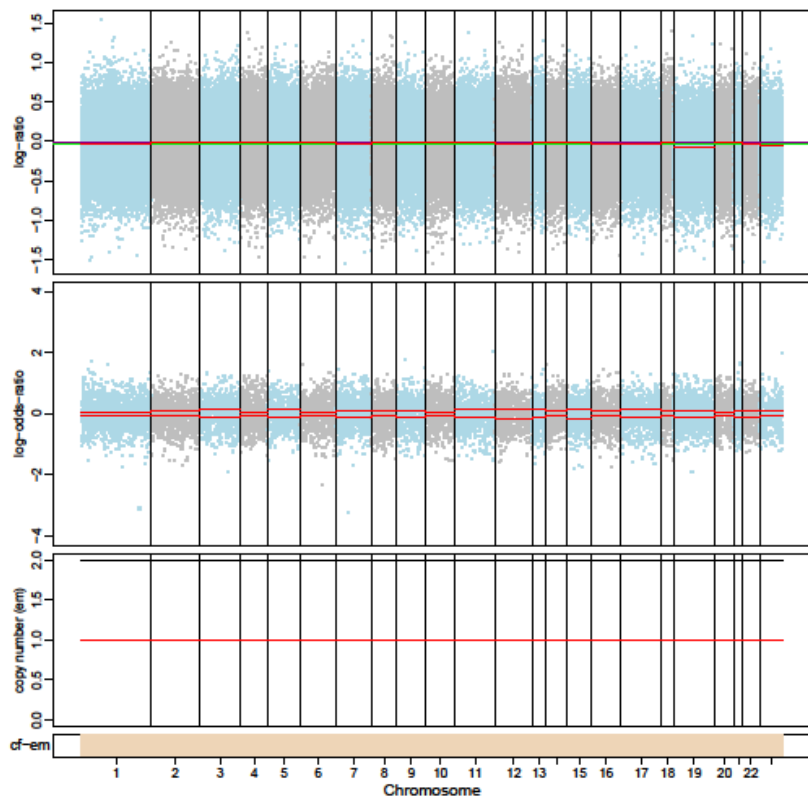

728-P2

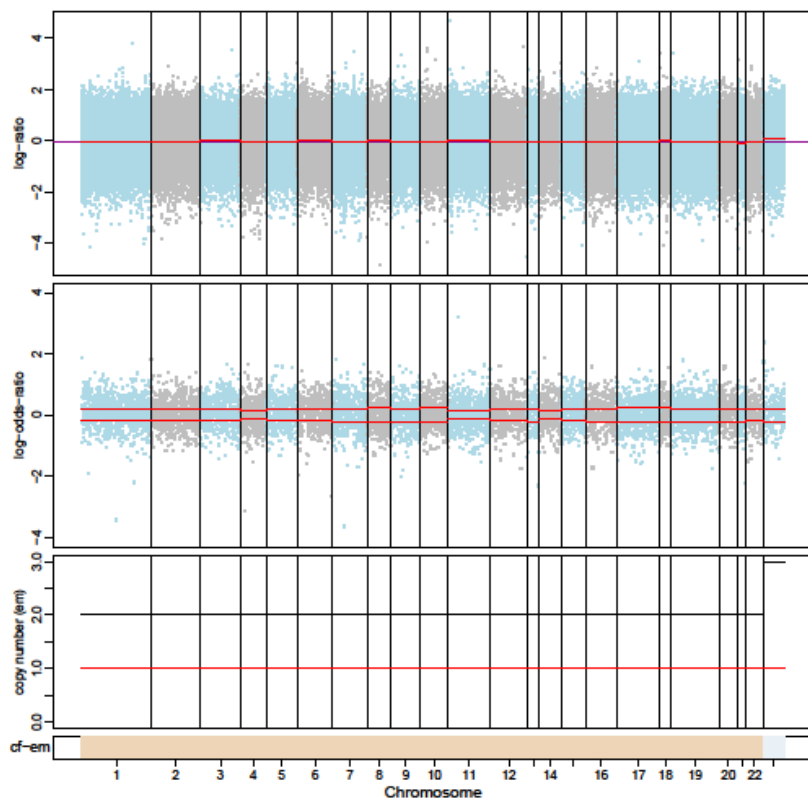

733-P2

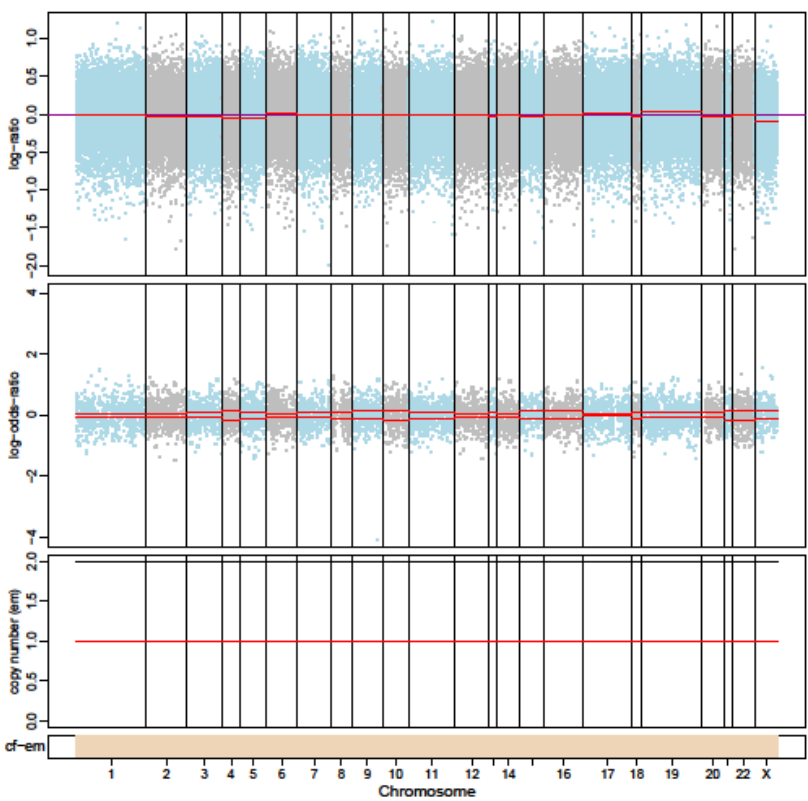

728-P1

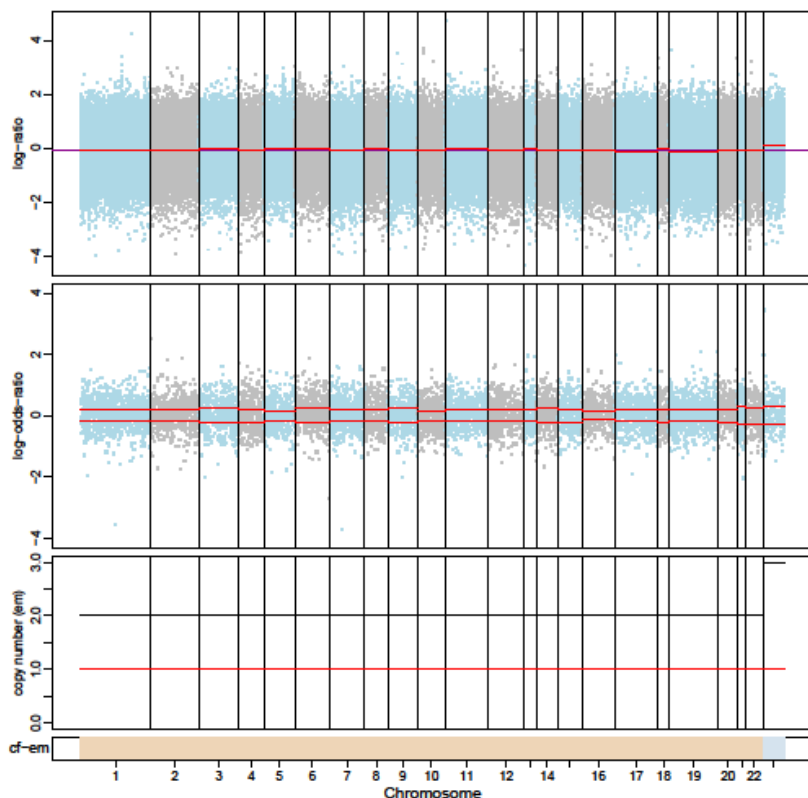

733-P1

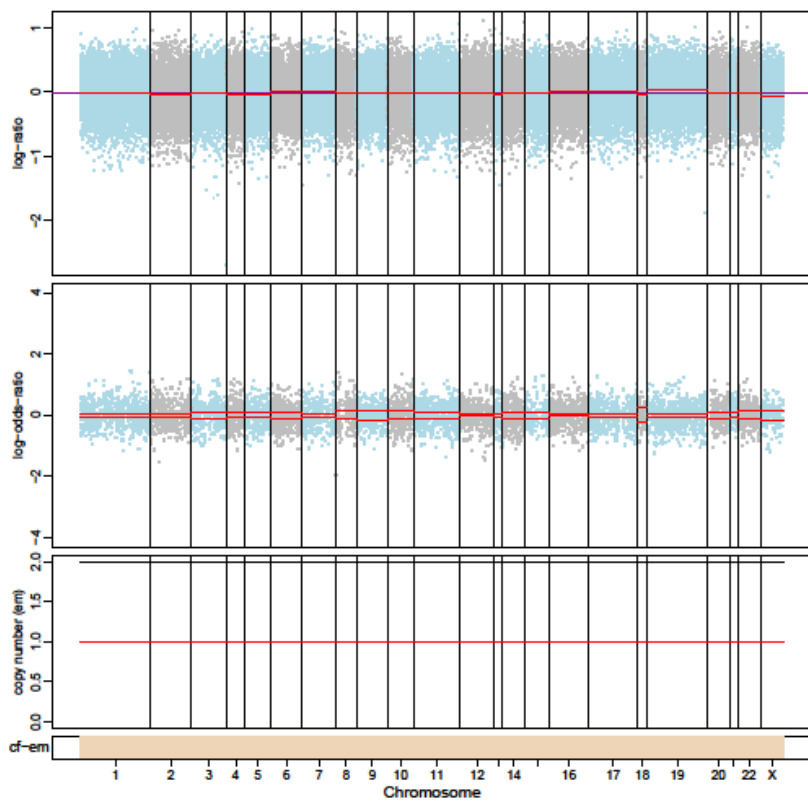

733-LR1

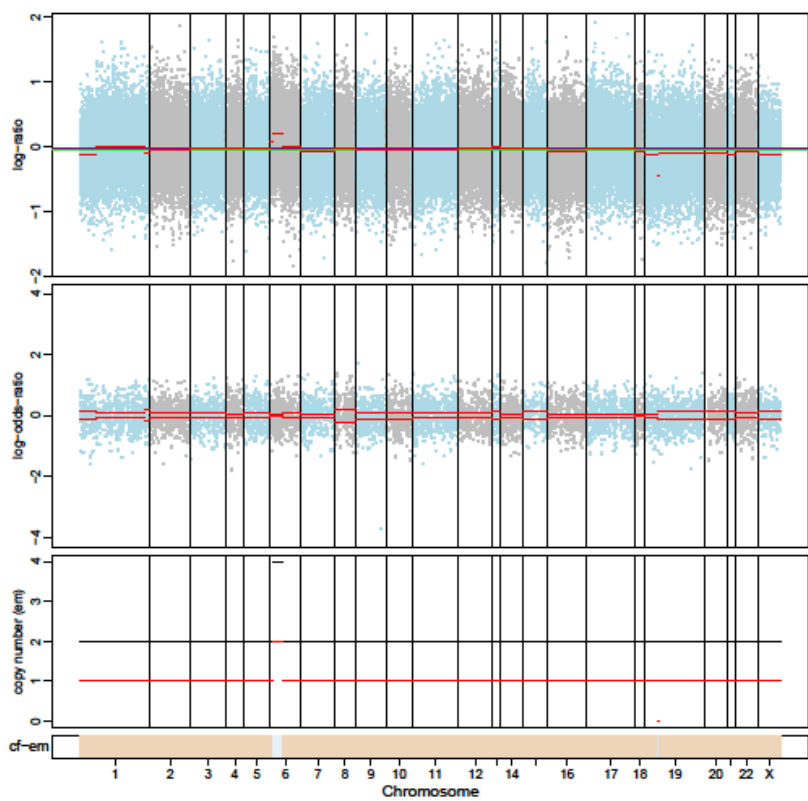

733-LR2

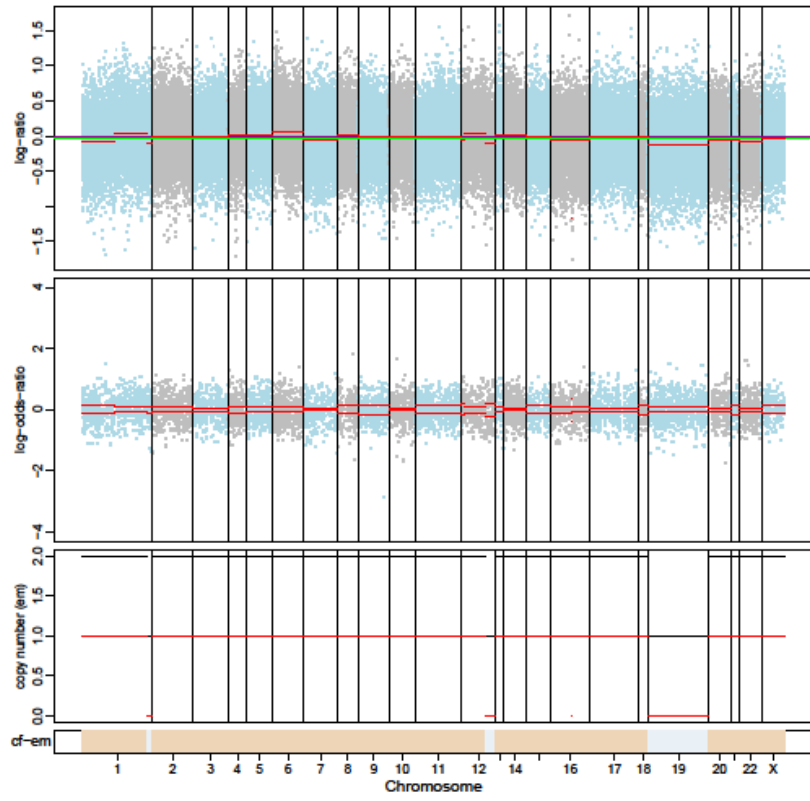

752-P1

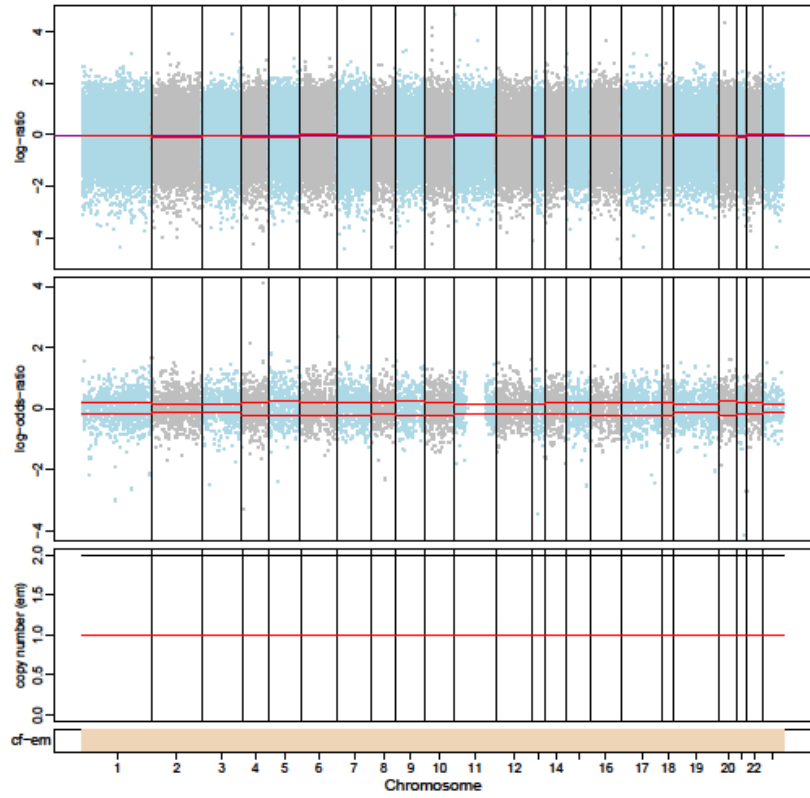

928-P0

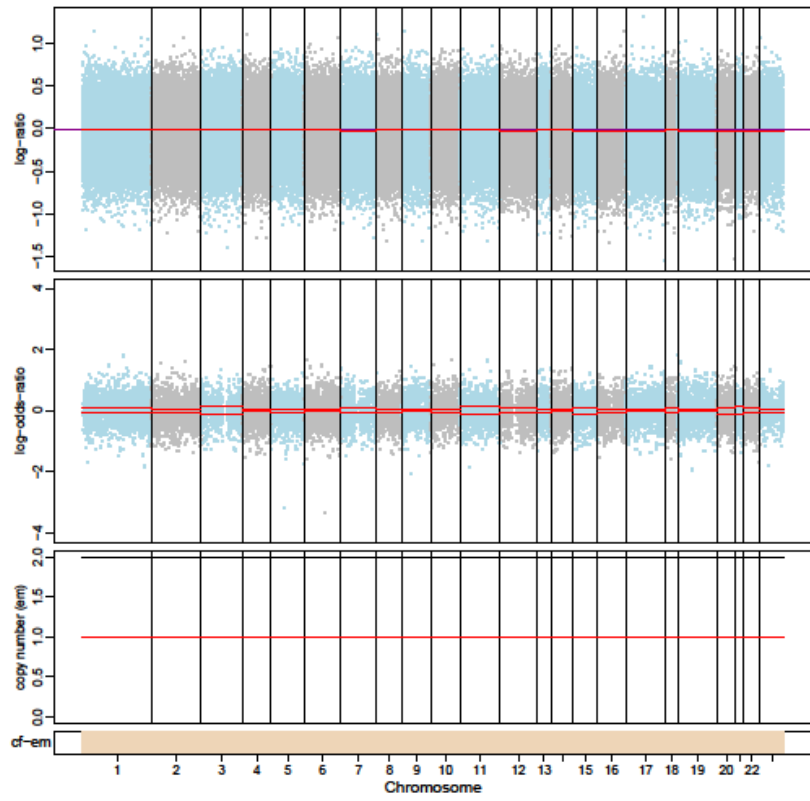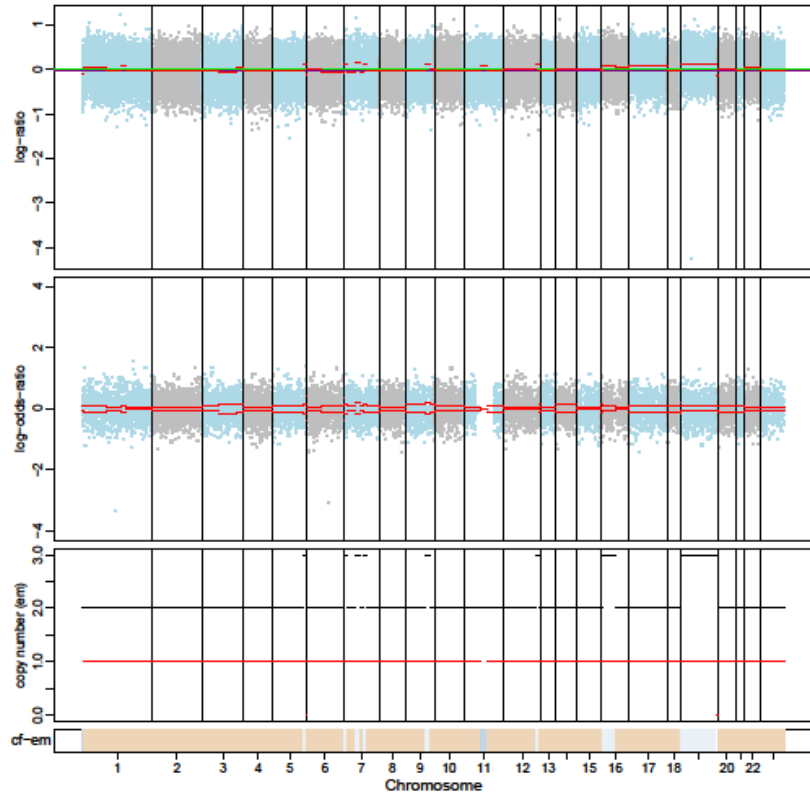

752-P0

752-P2

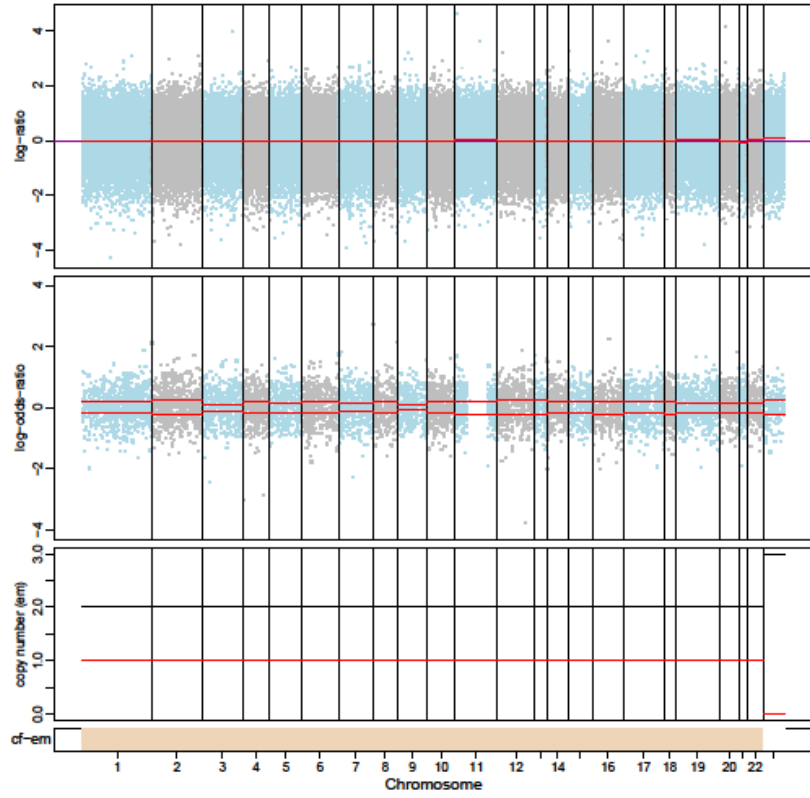

928-P1

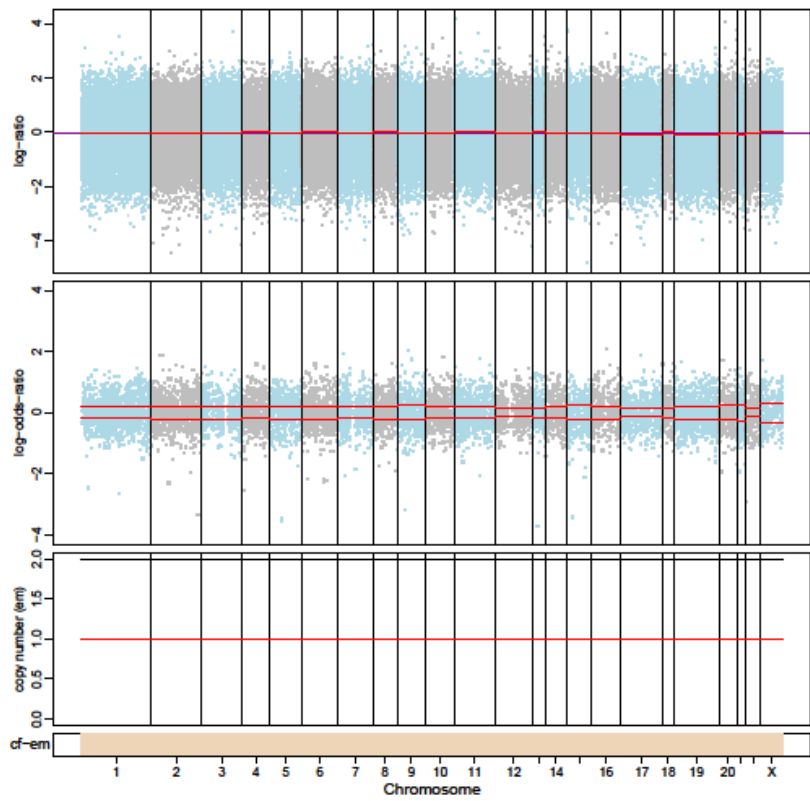

928-P2

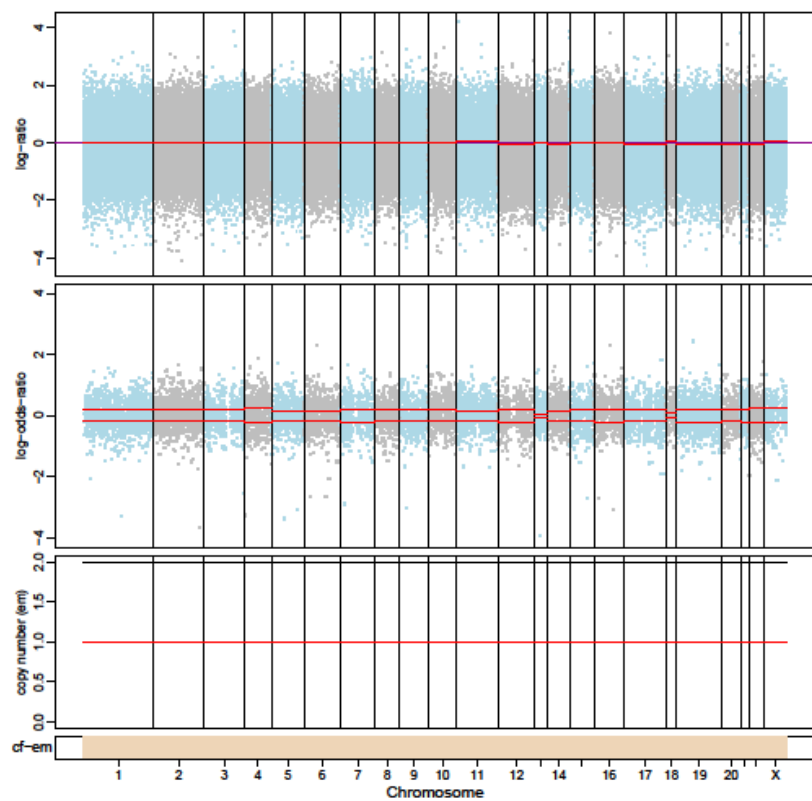

929-P1

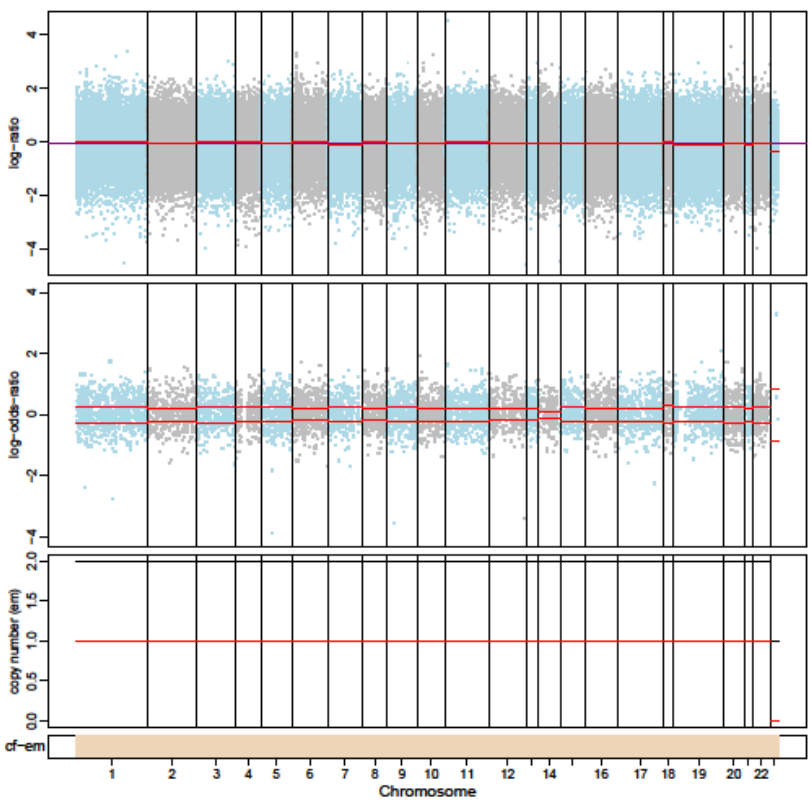

930-P0

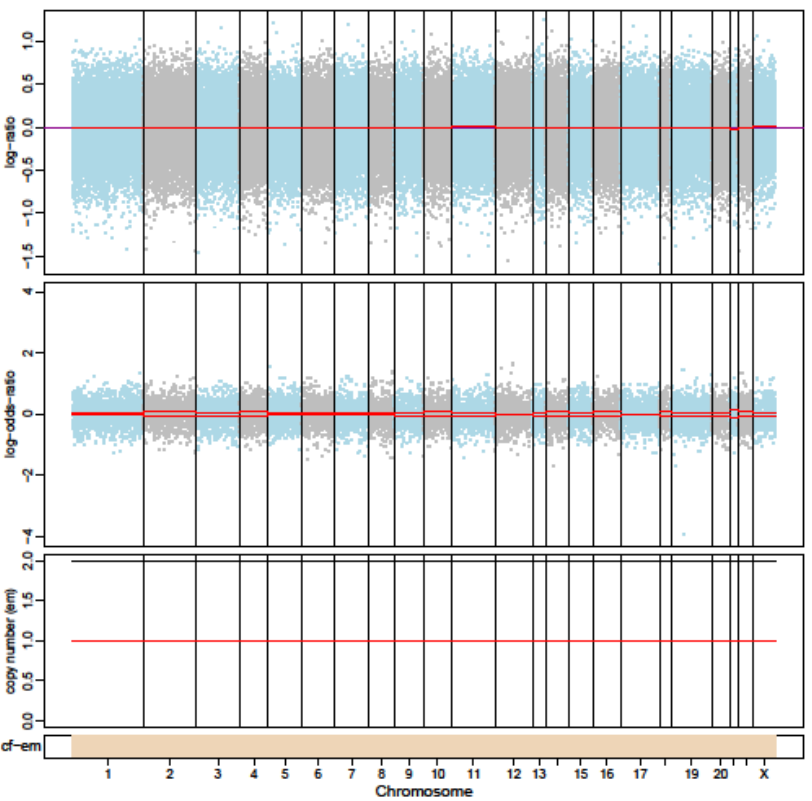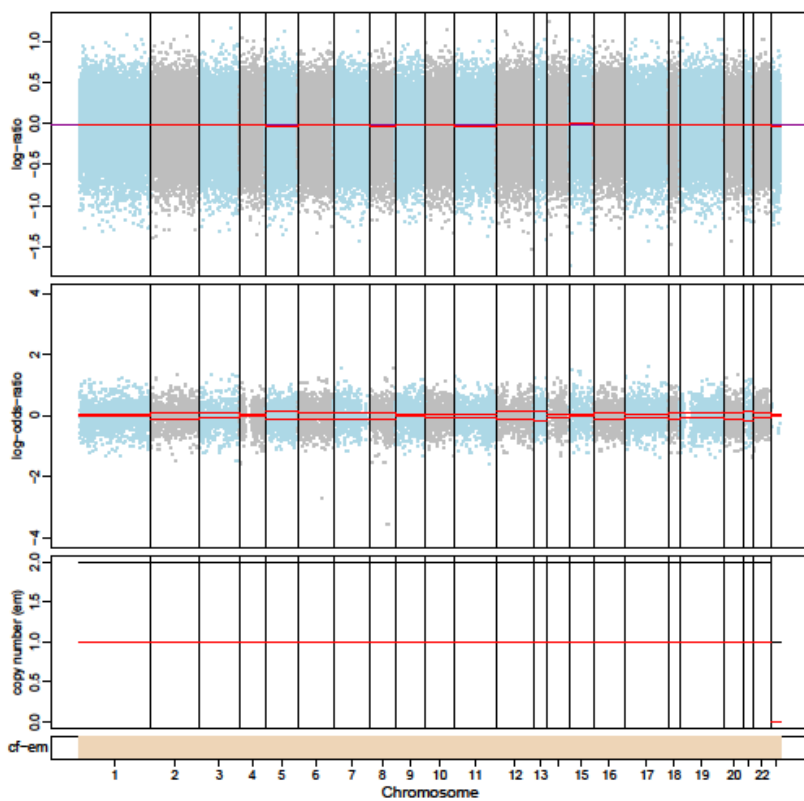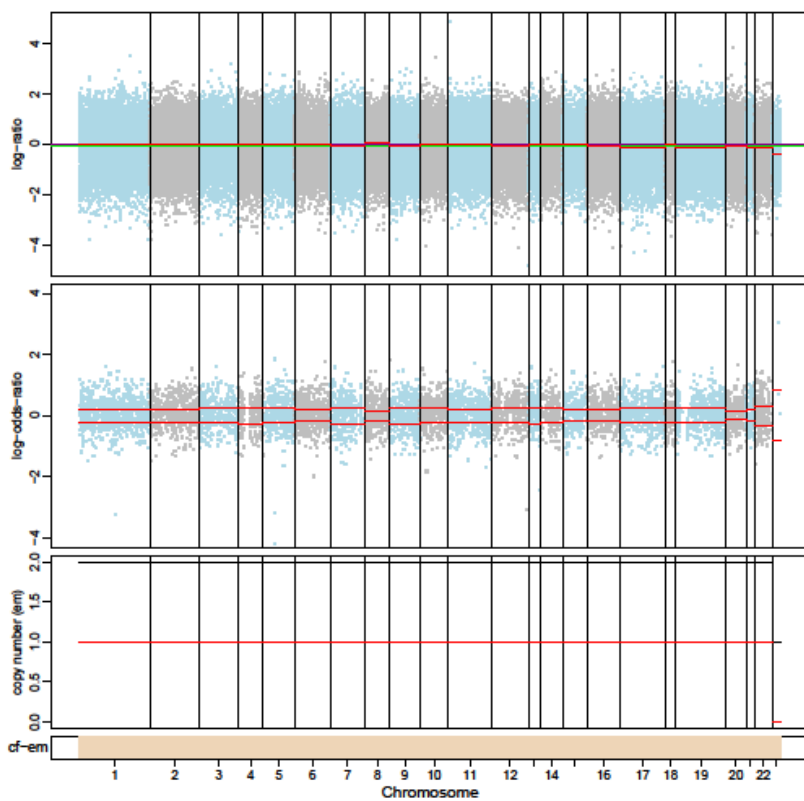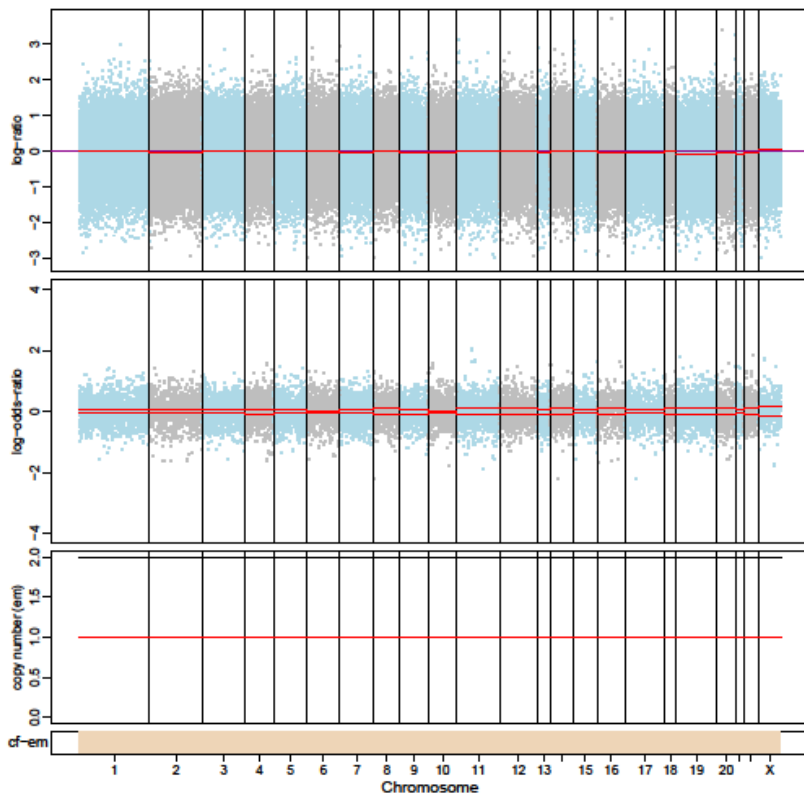

929-P0

929-P2

930-P1

930-P2

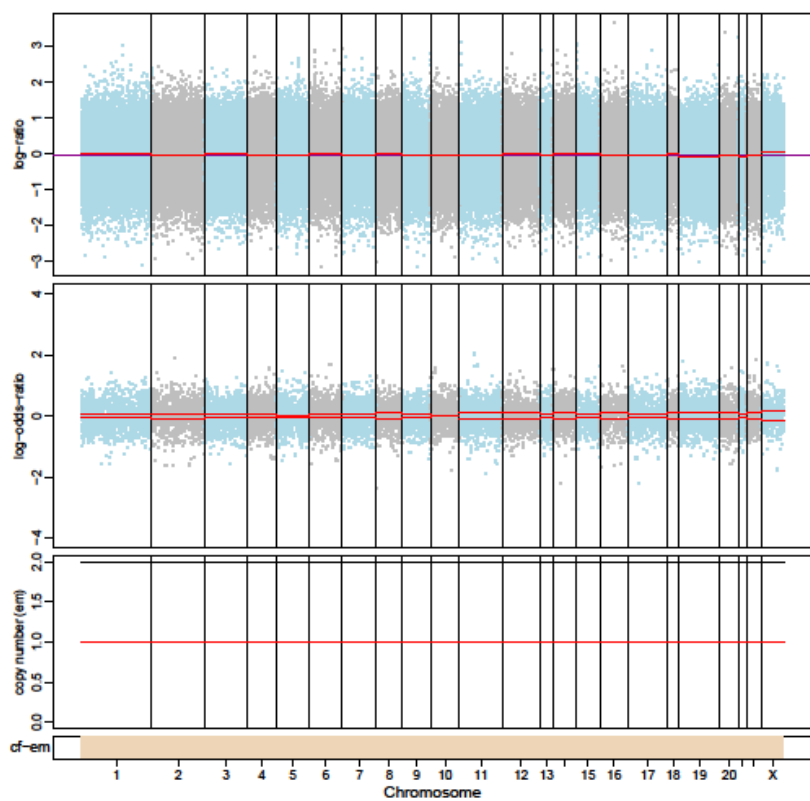

930-P3

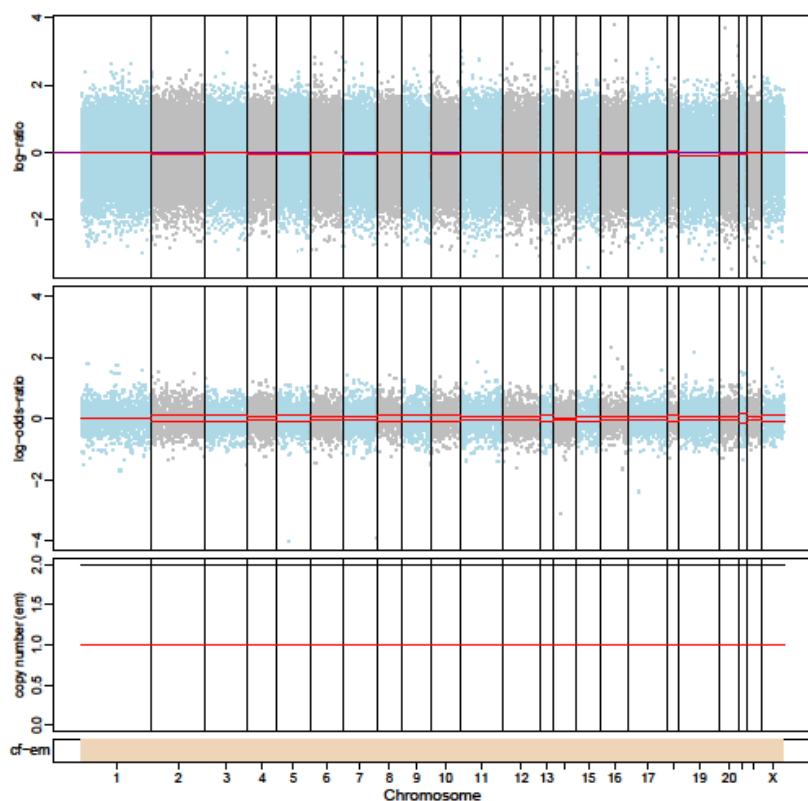

930-LR1

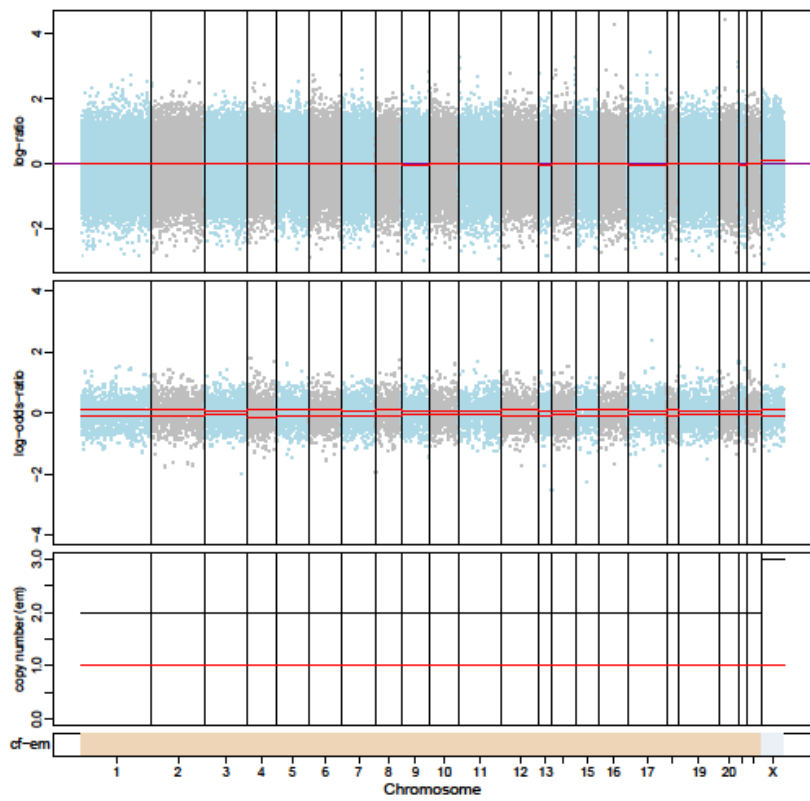

930-LR2

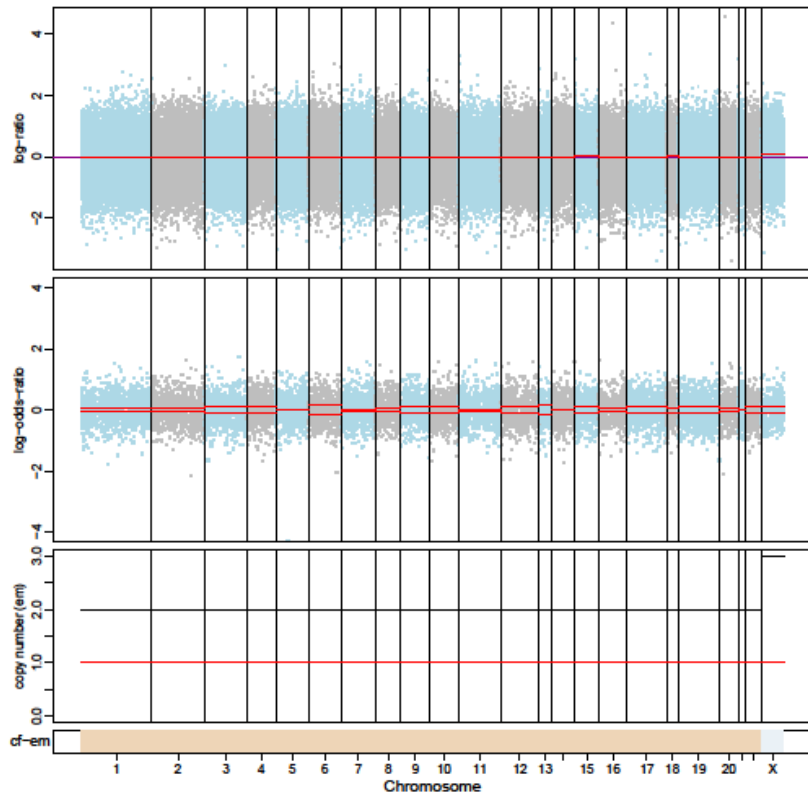

931-P0

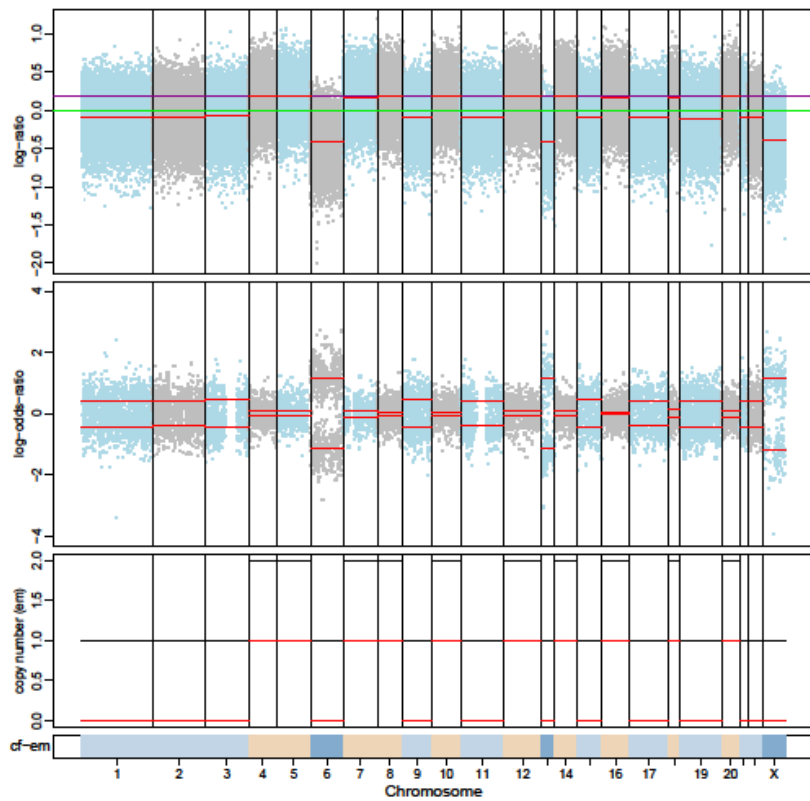

931-P1

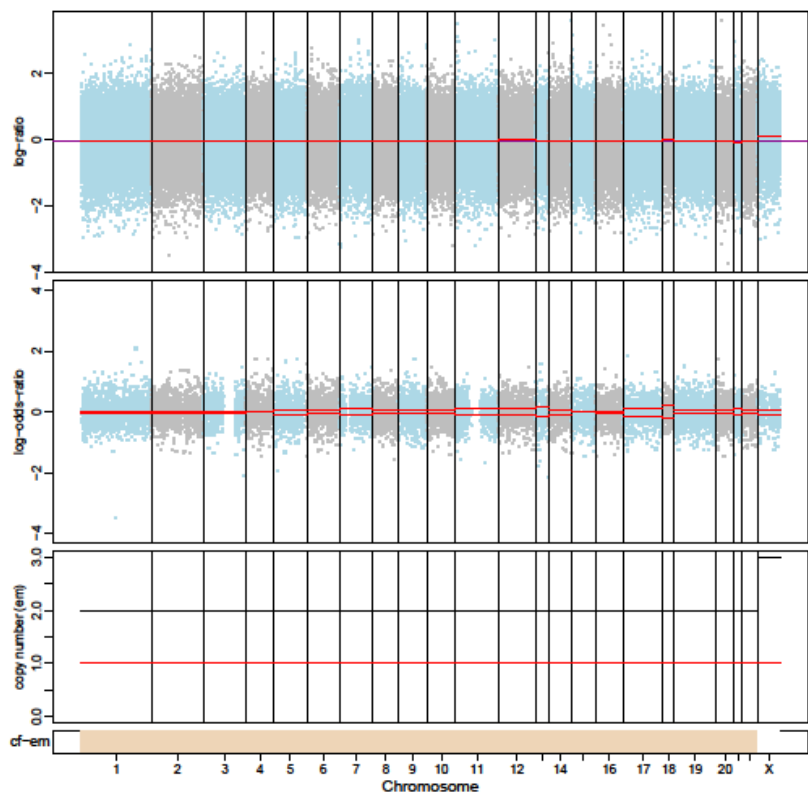



931-P2

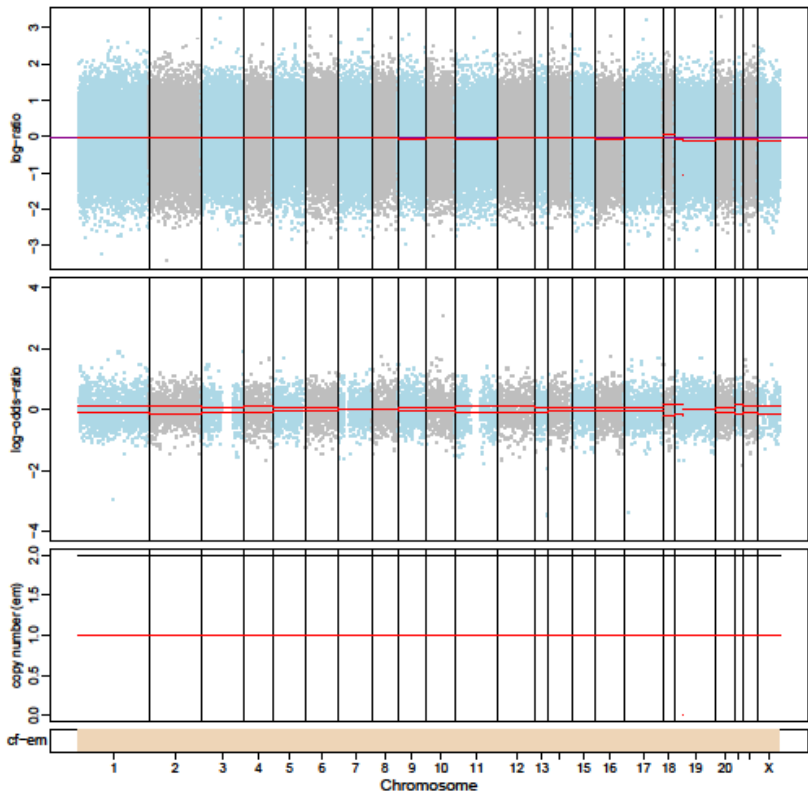

962-P

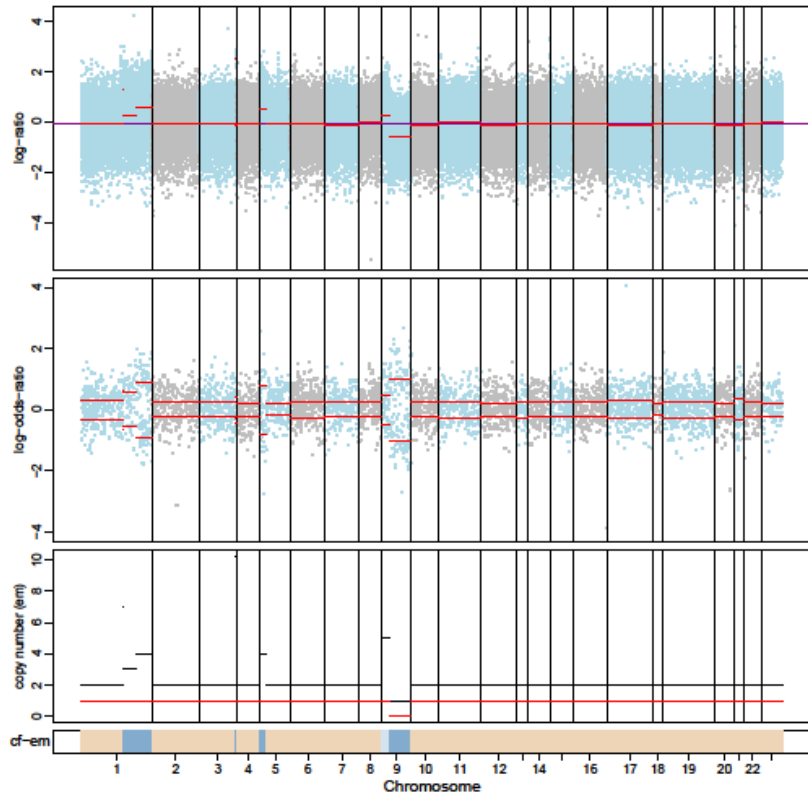

962-P0

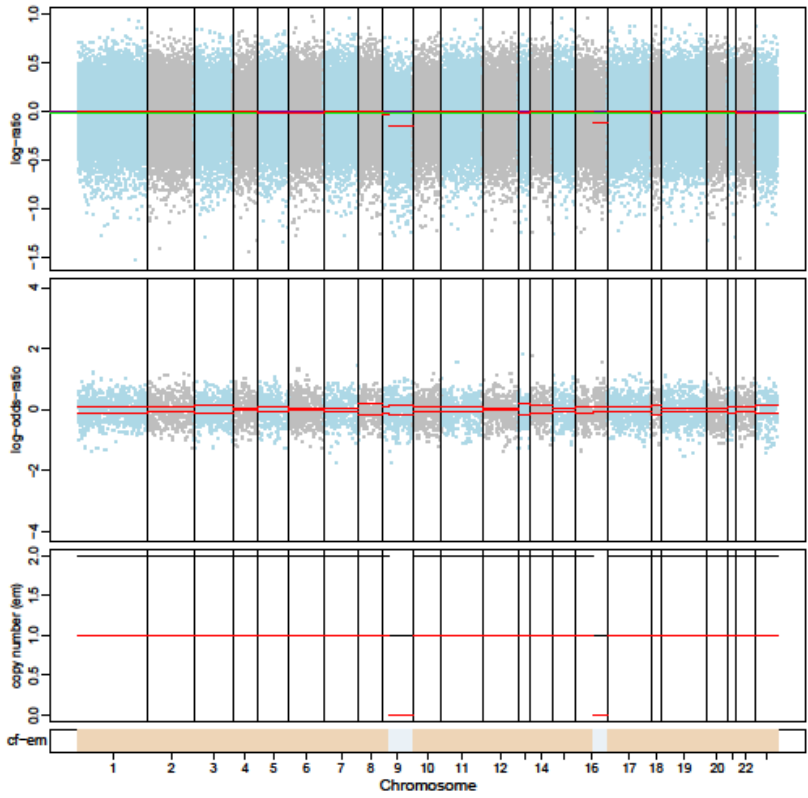

962-P1

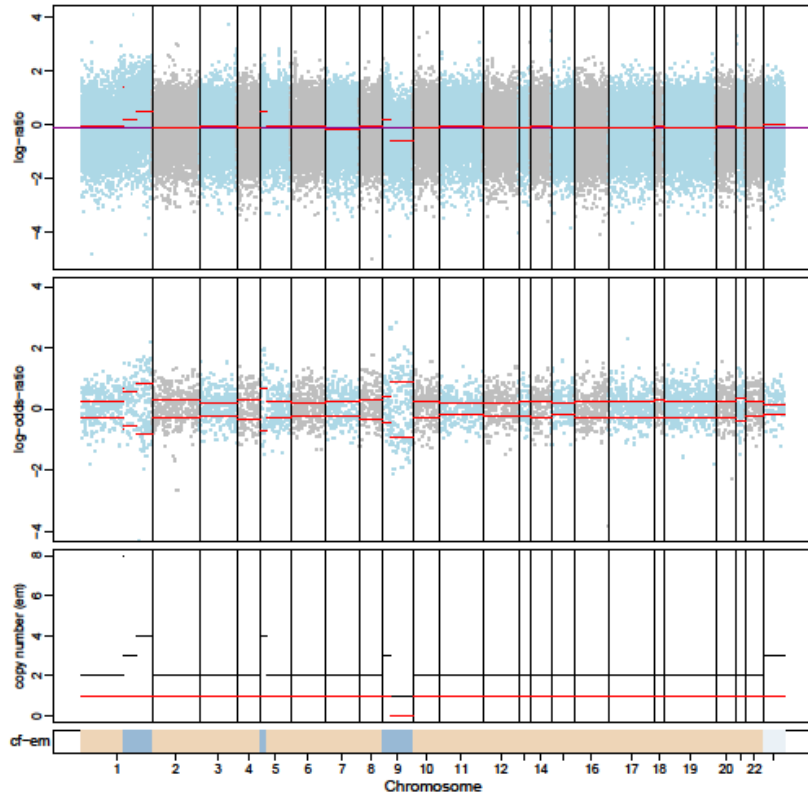

962-P2

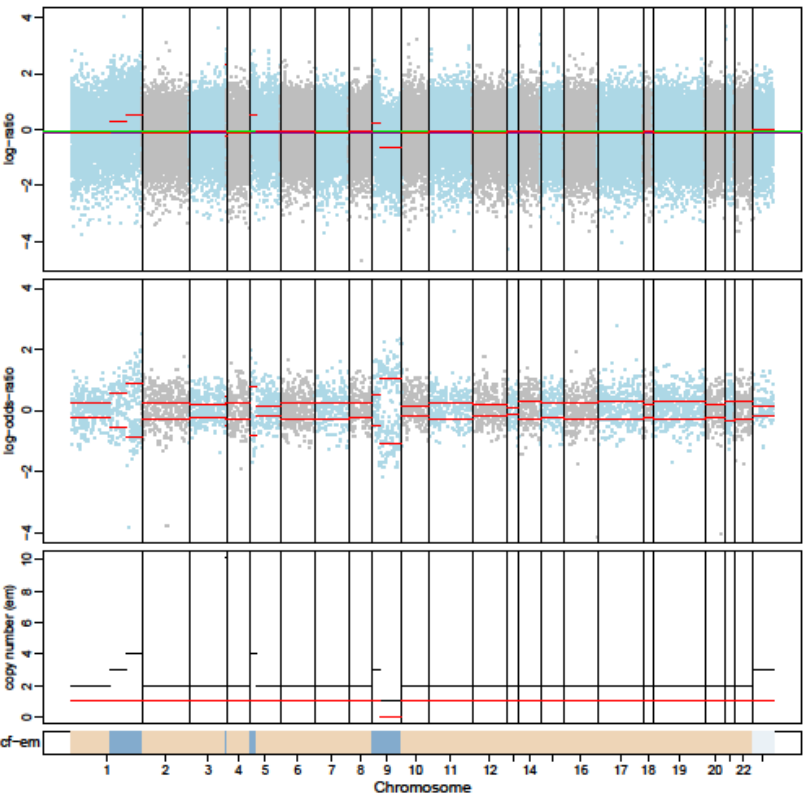

962-P3

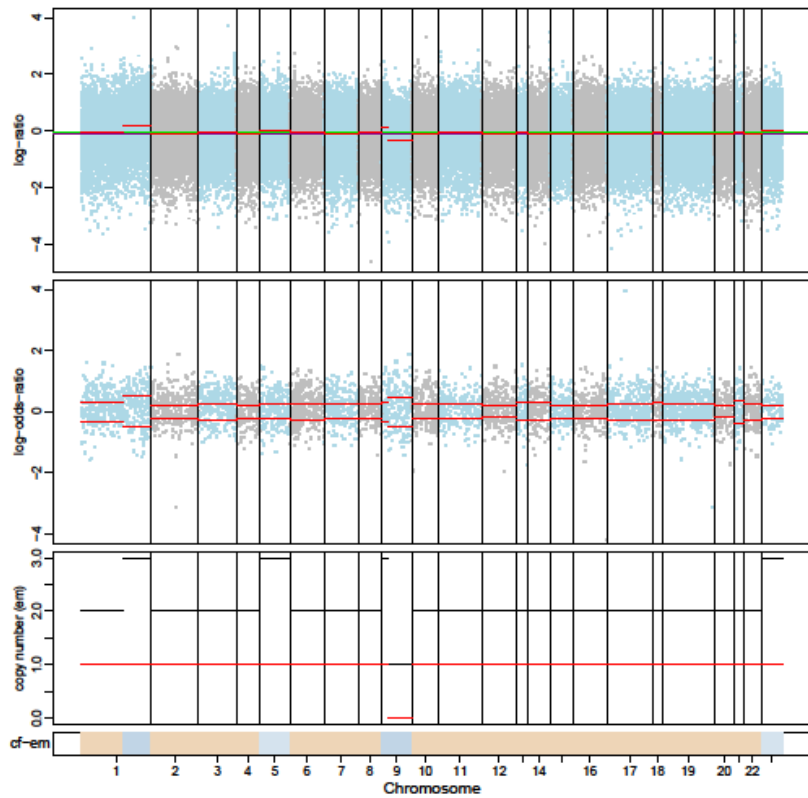

962-P4

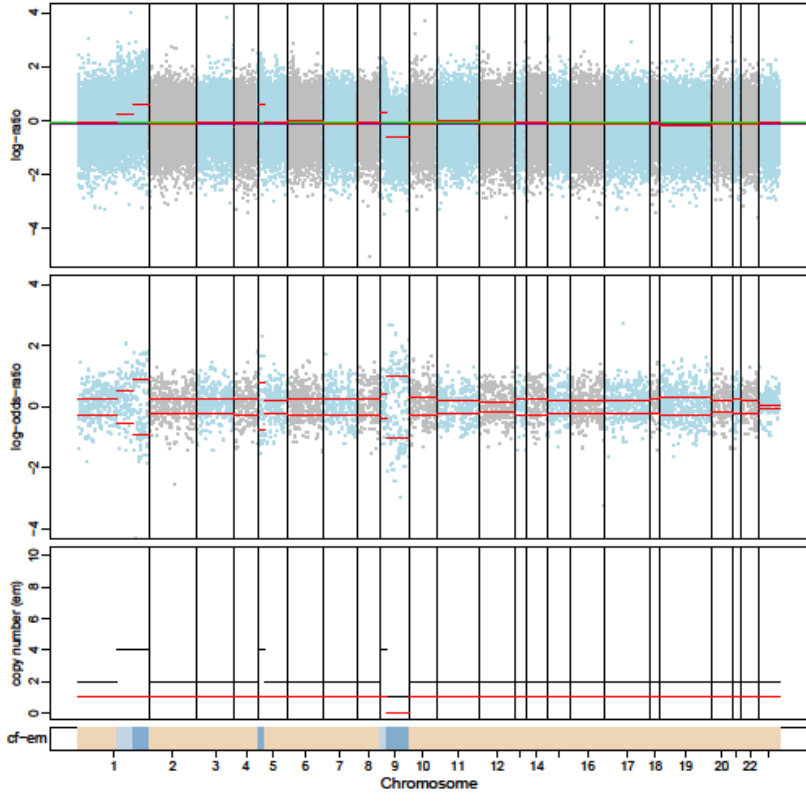

962-P5

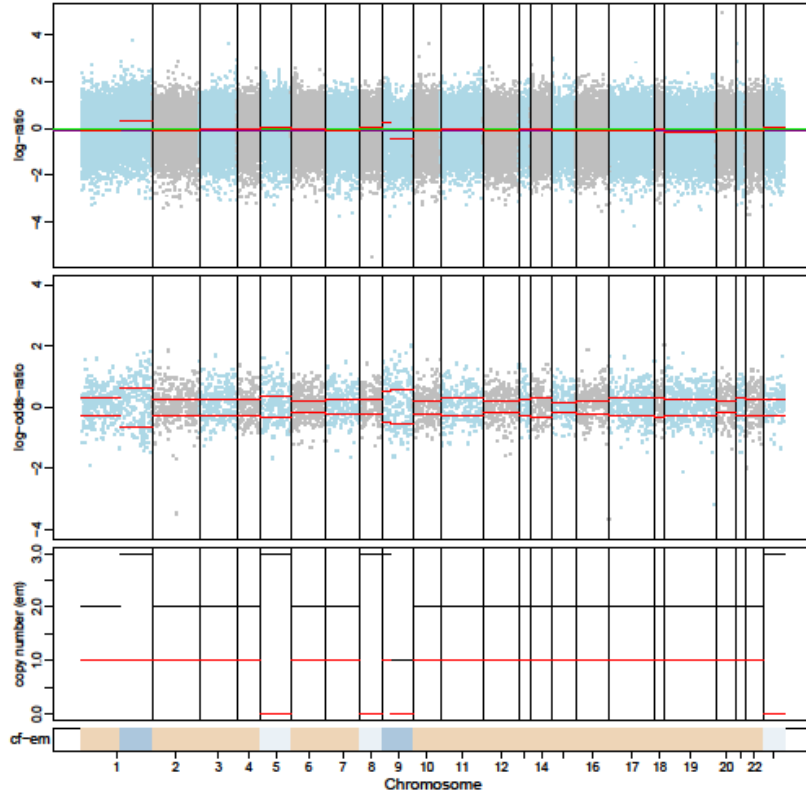

962-LR

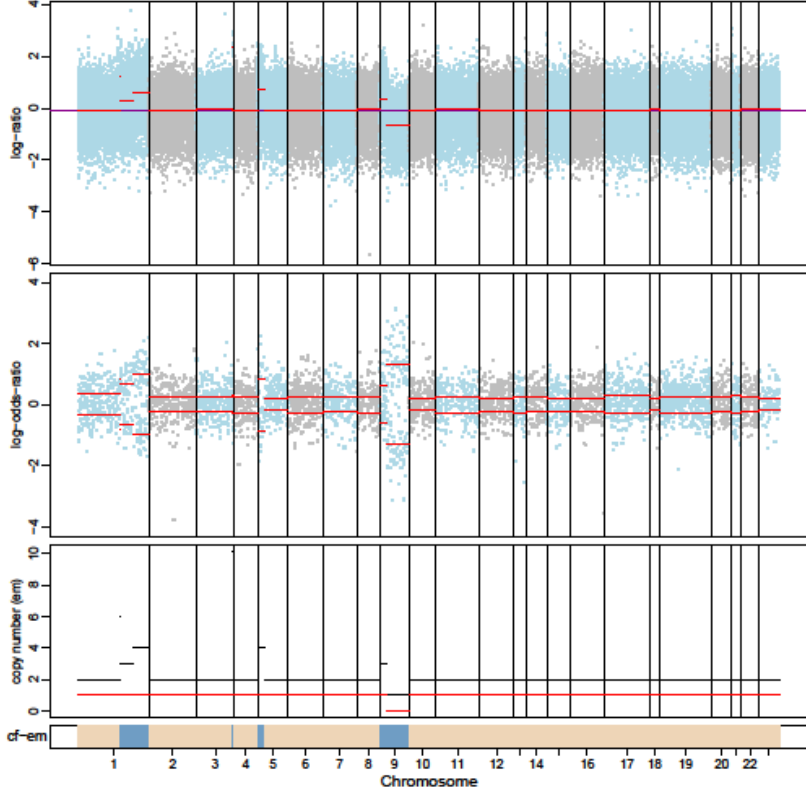

962-LR1

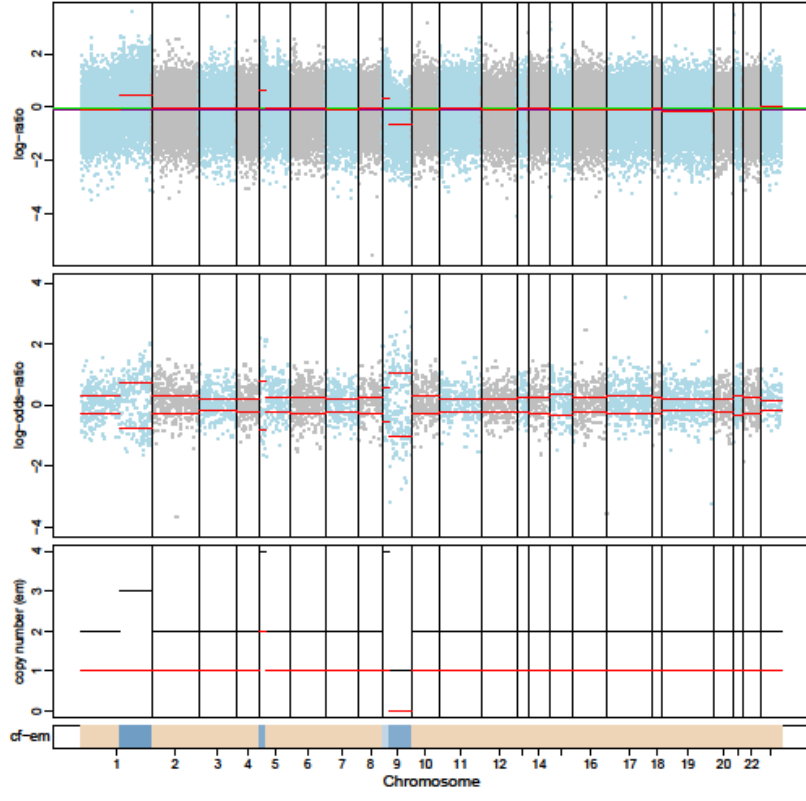

962-LR2

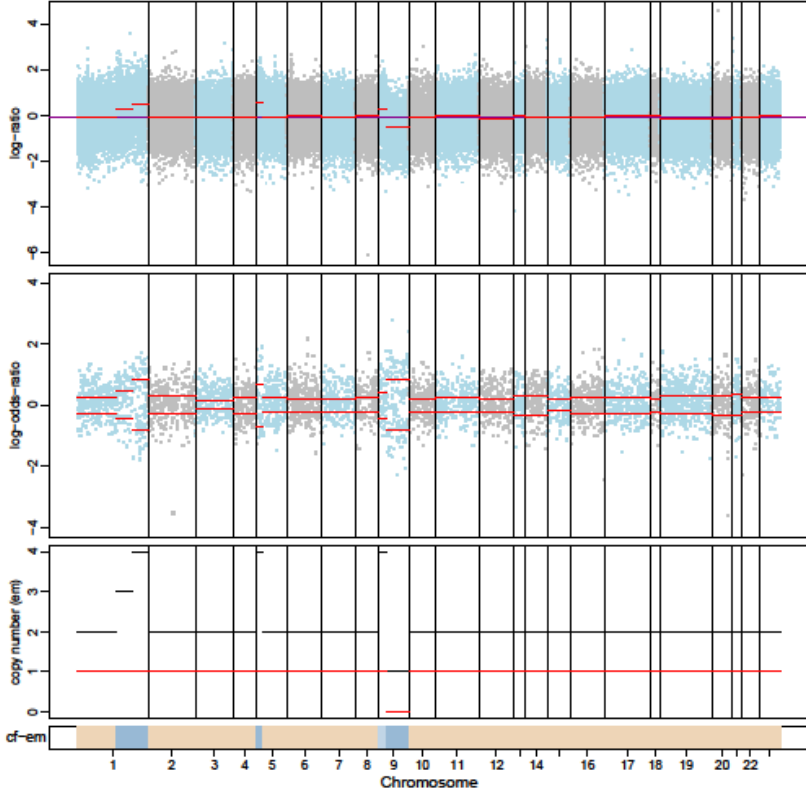

962-LR3

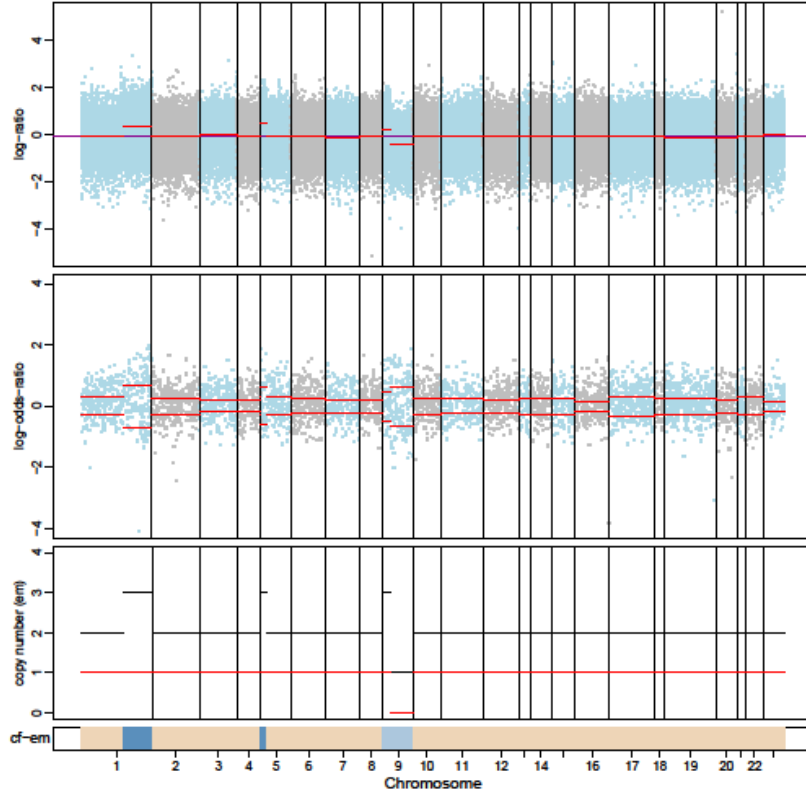

972-P0

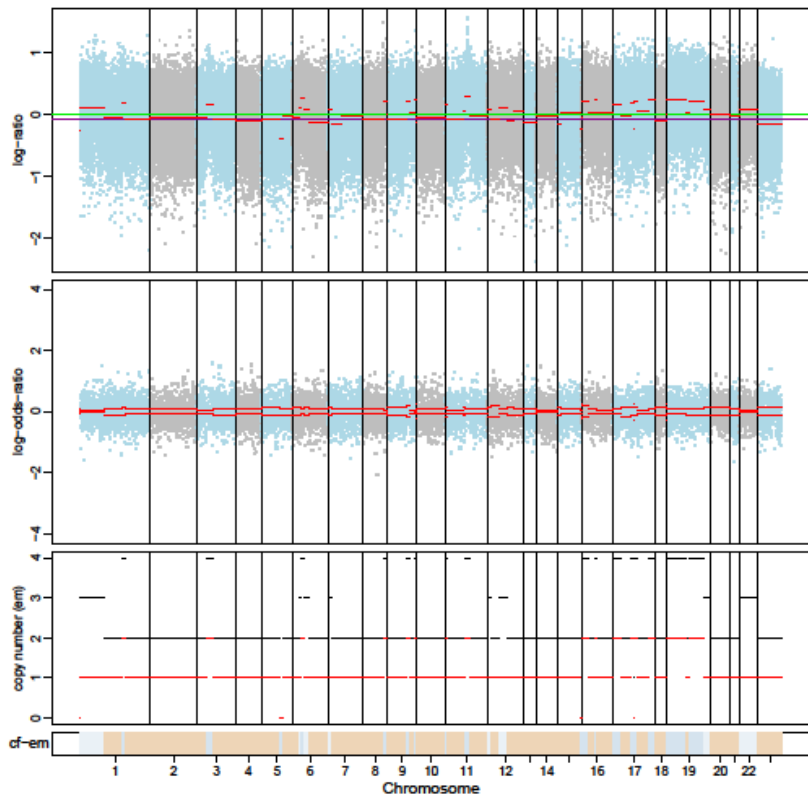

972-P2

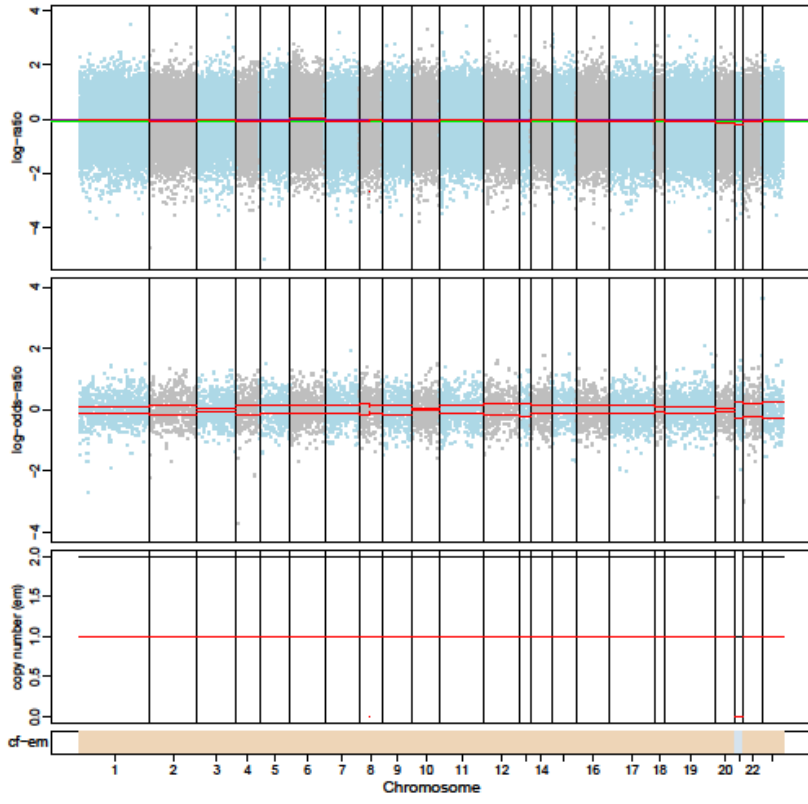

973-P1

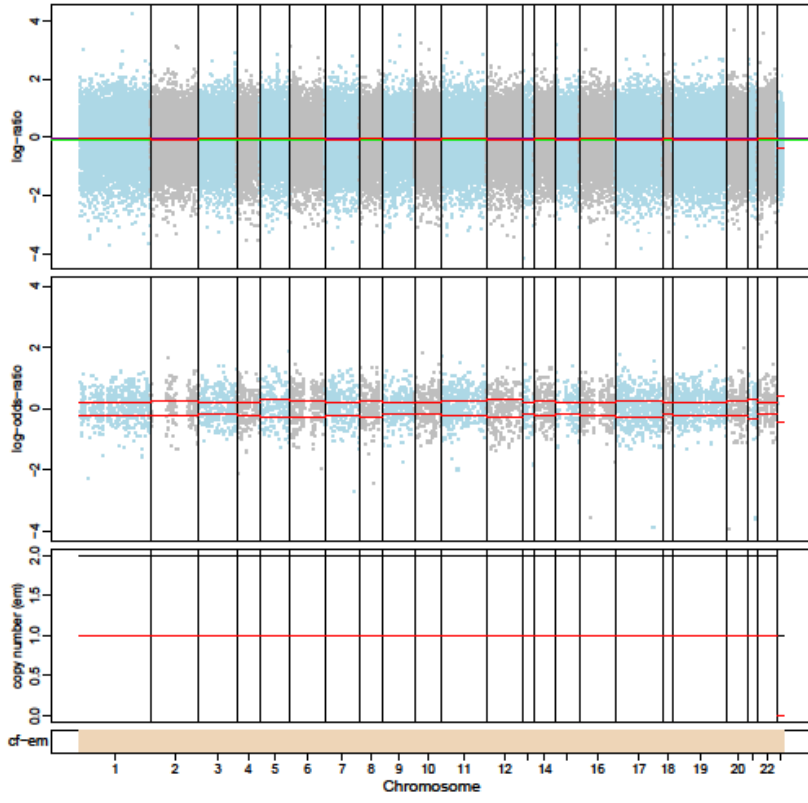

972-P1

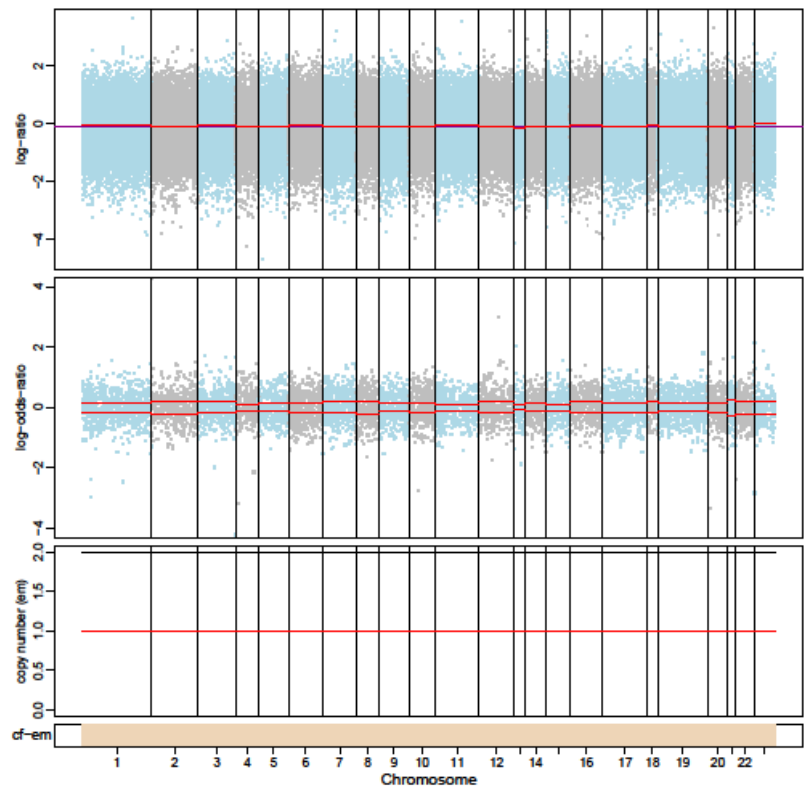

973-P0

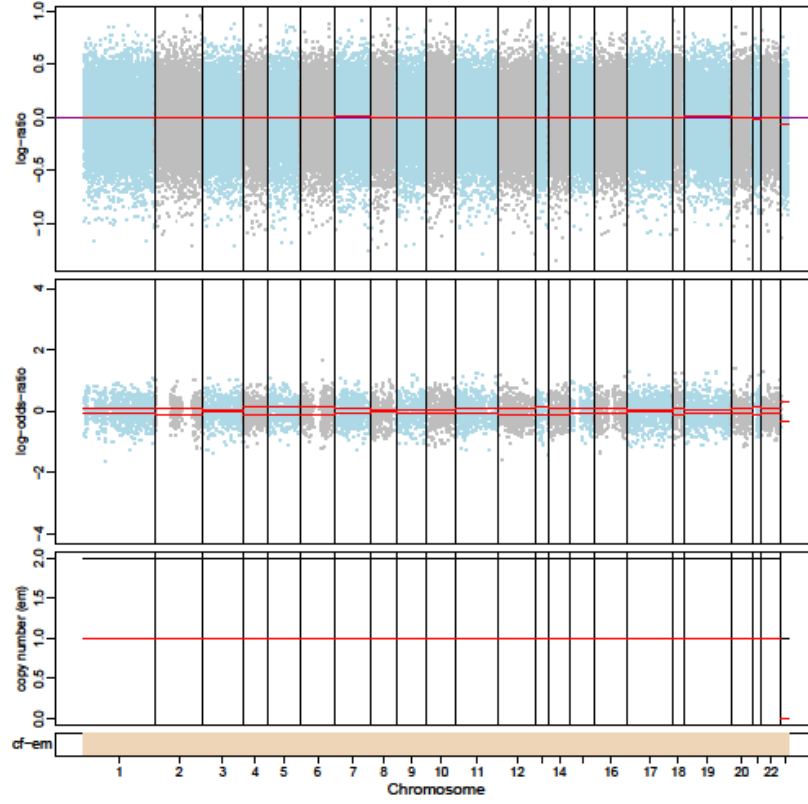

973-P2

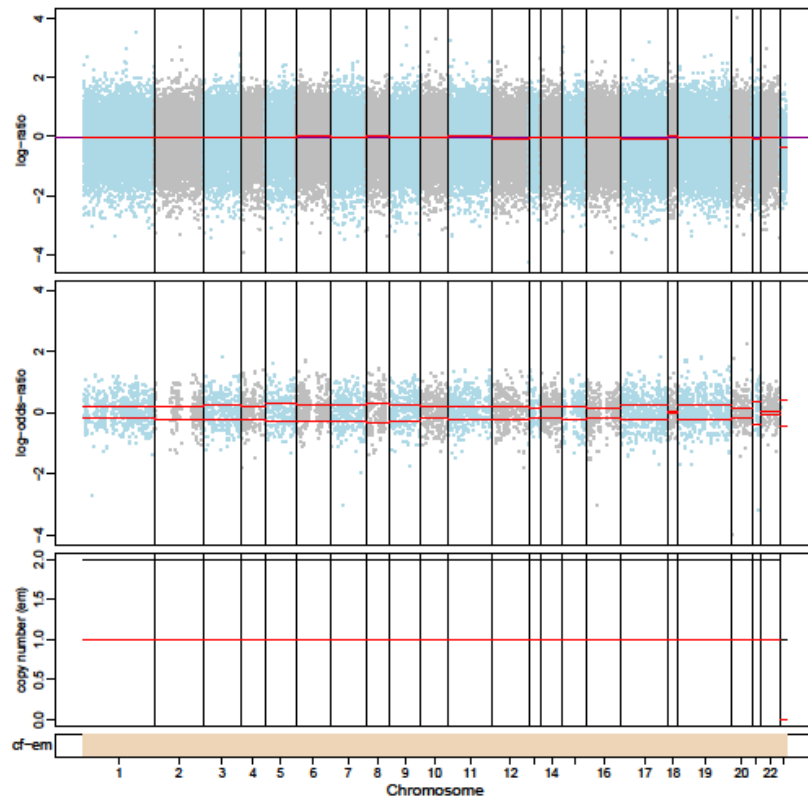

1182-P0

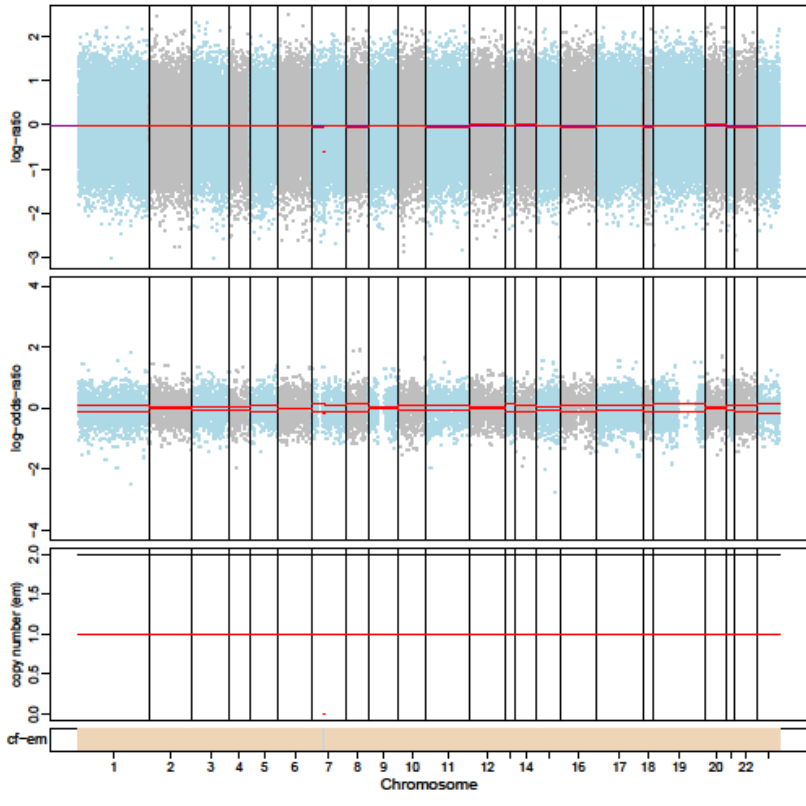

1182-P1

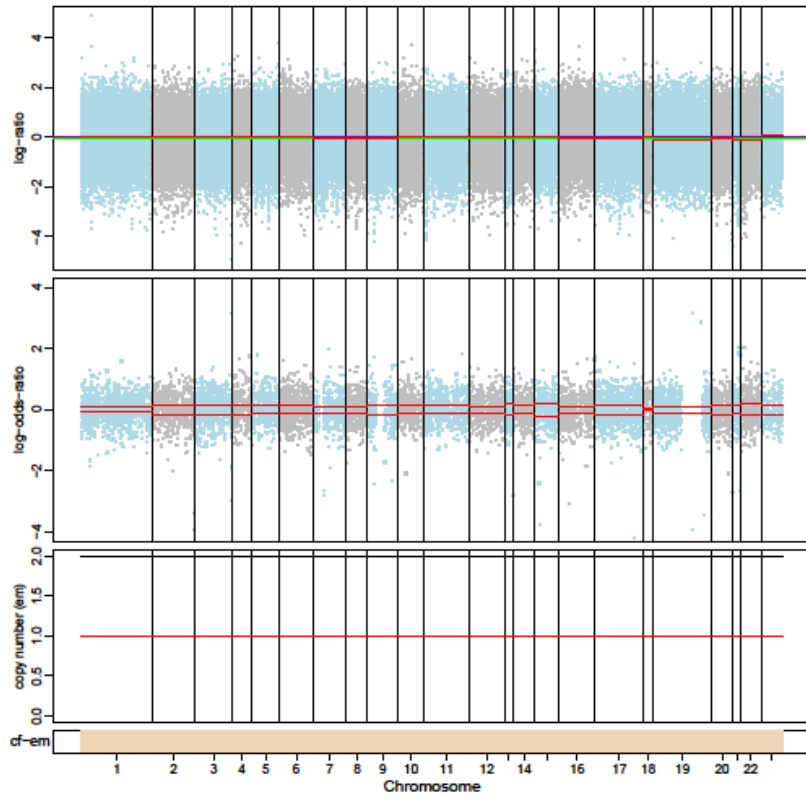

1182-P2

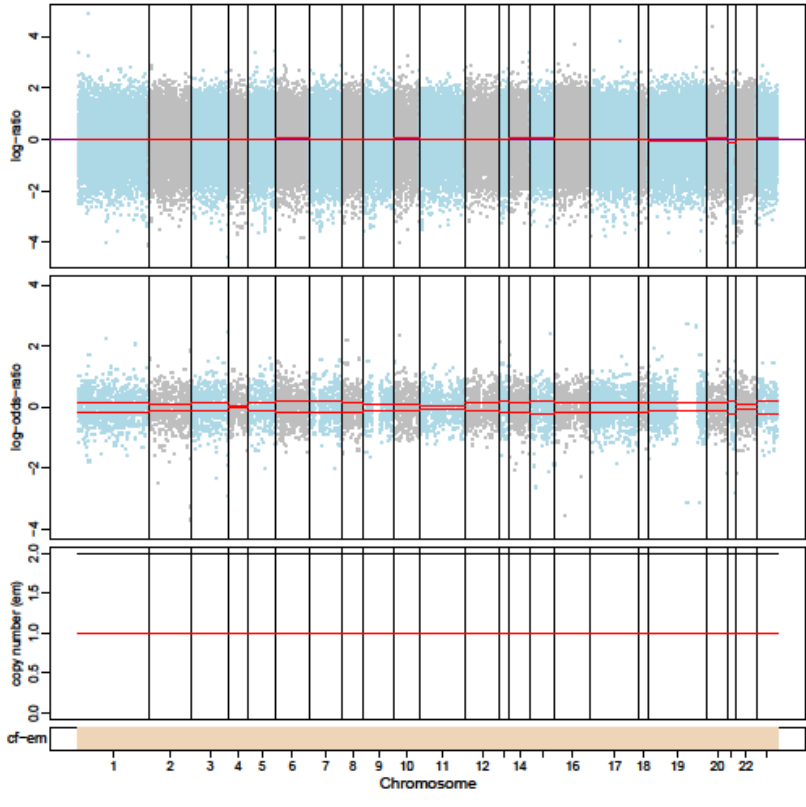

1002-P

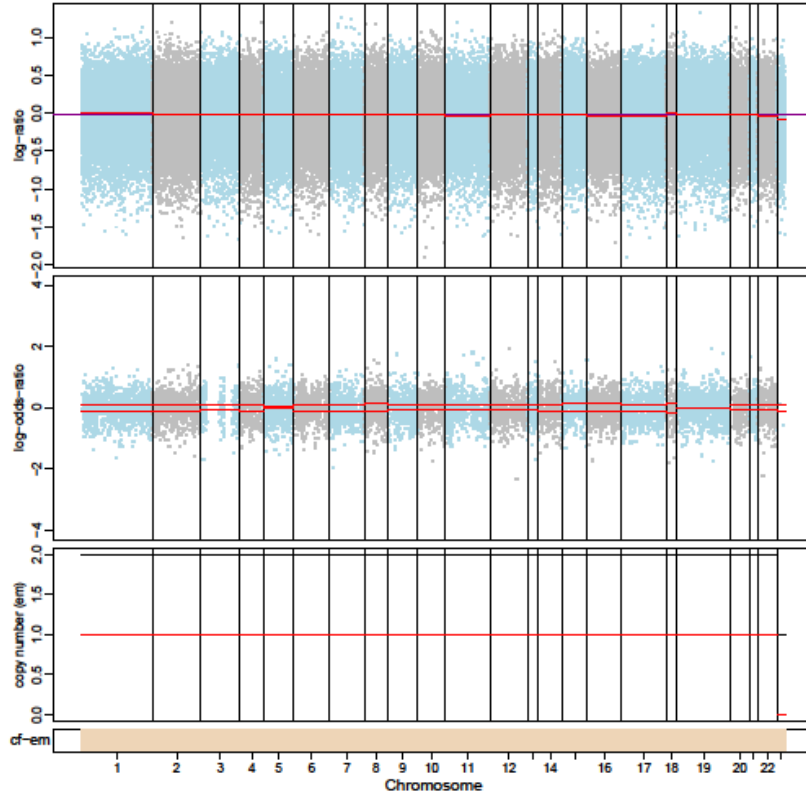

1002-P1

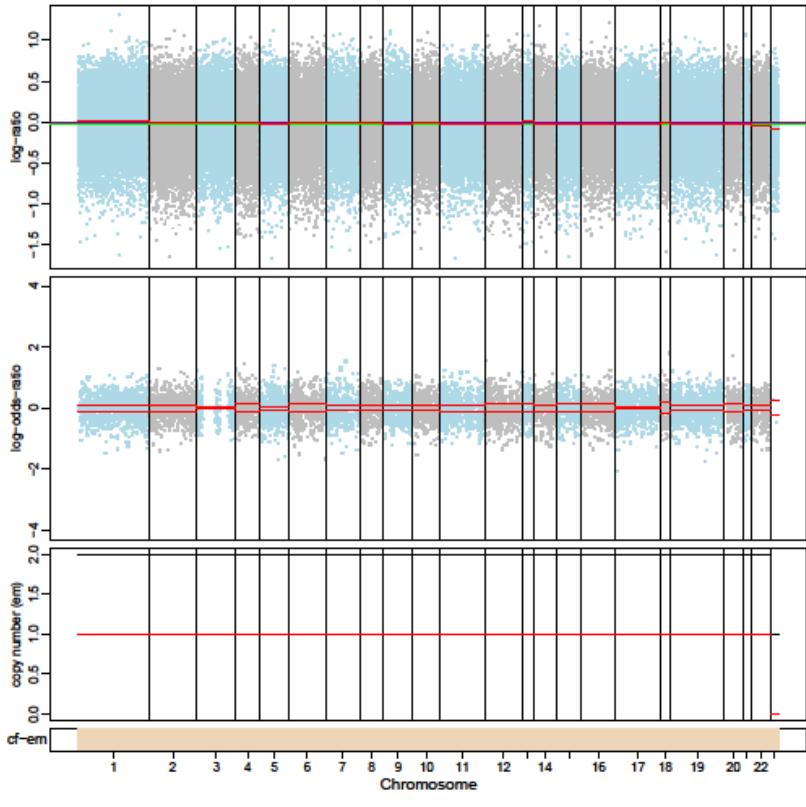

1002-P2

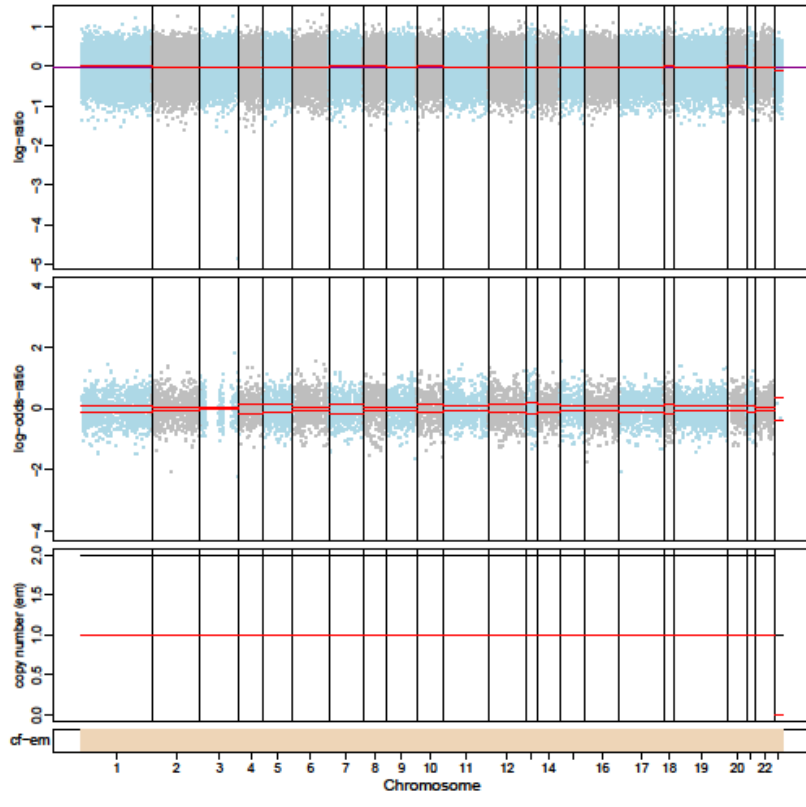

1002-LR

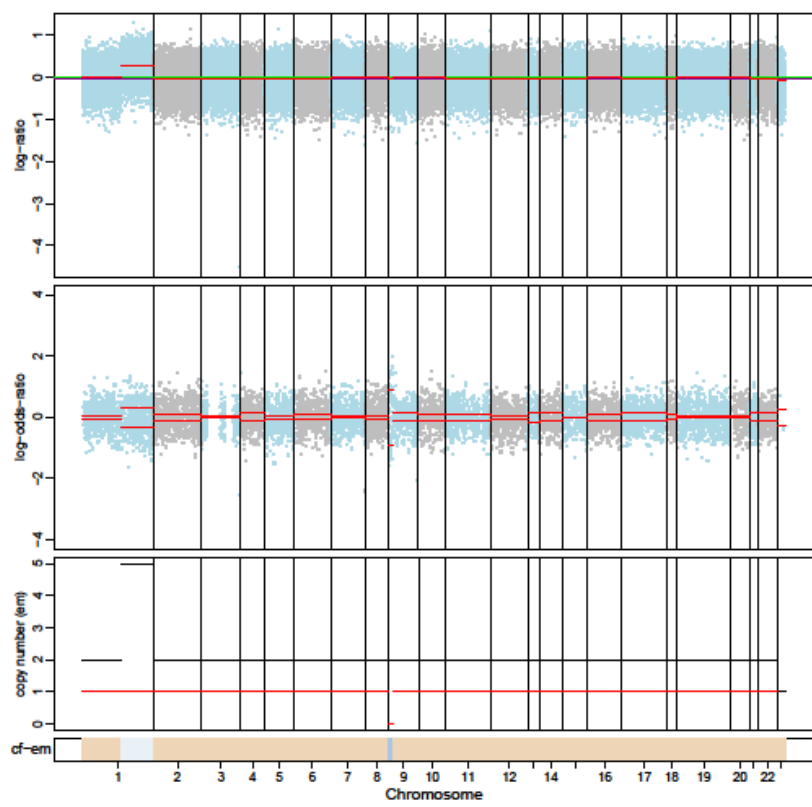

1002-LR1

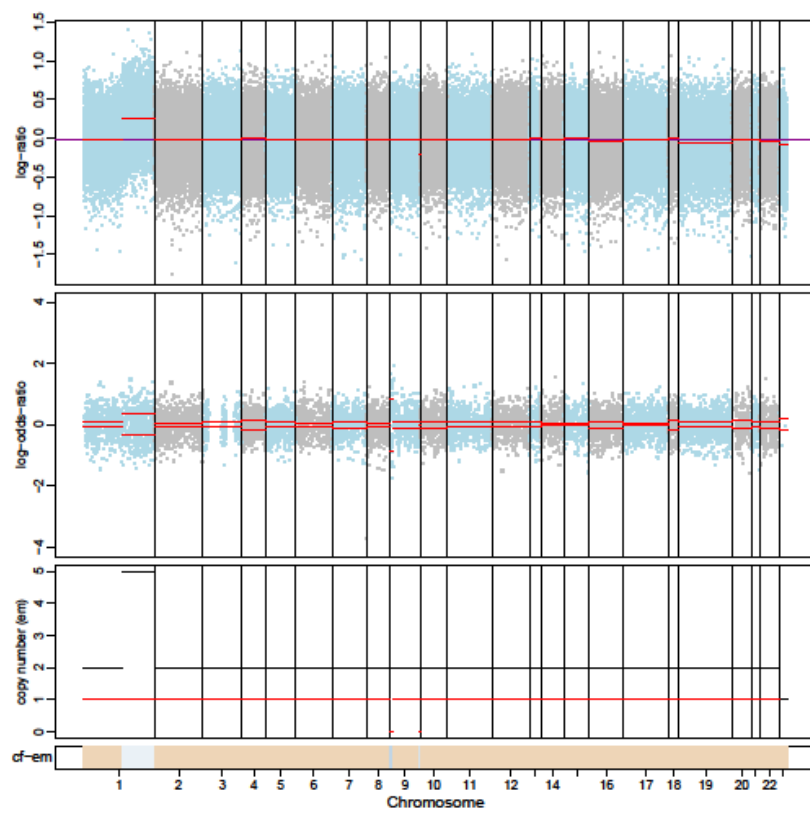

1002-LR2

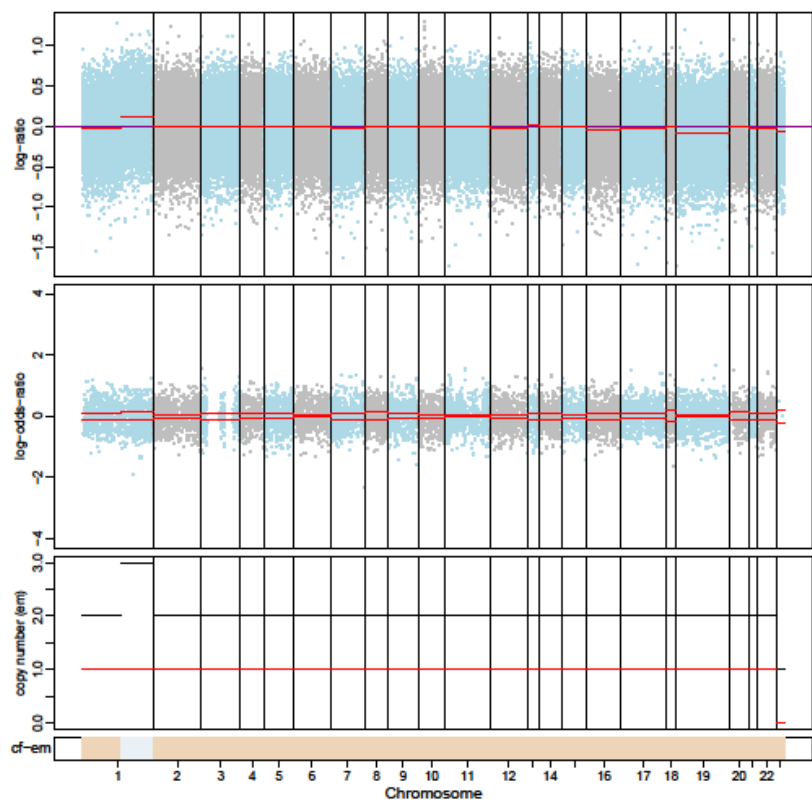

1002-LR3

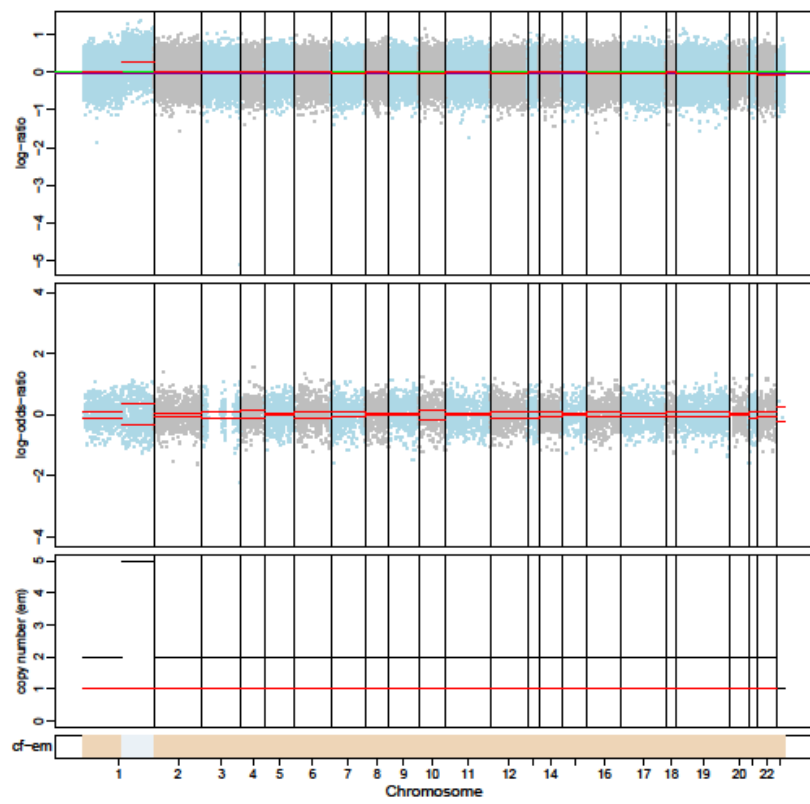

1012-P1

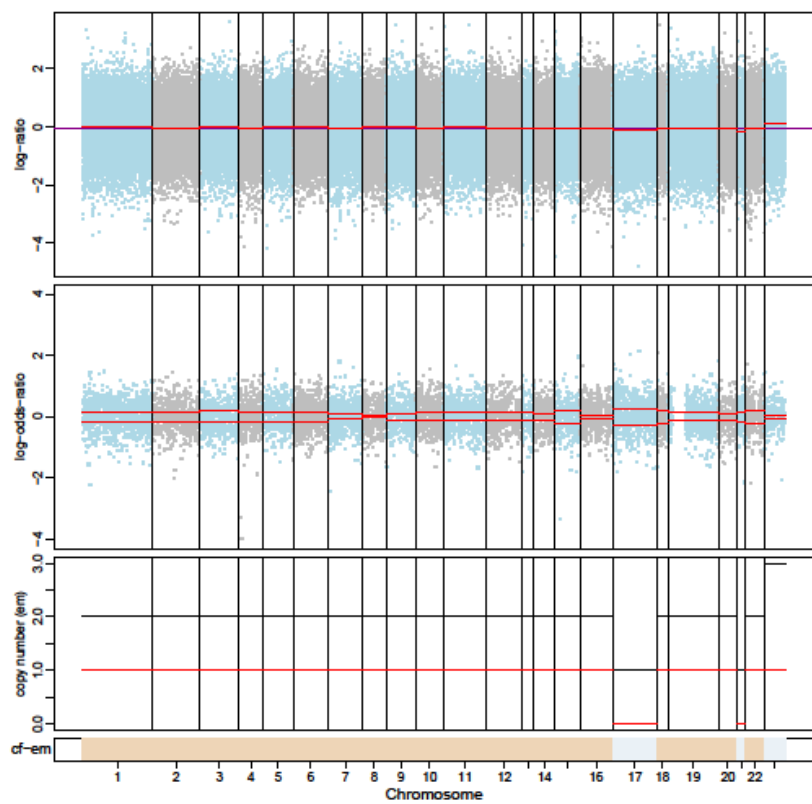

1012-P2

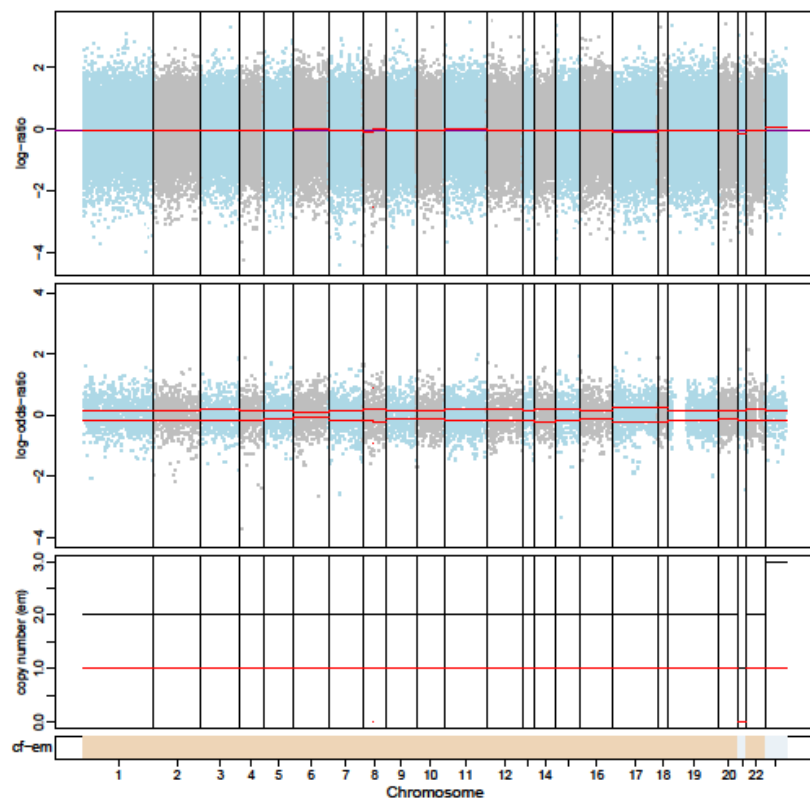

1036-P0

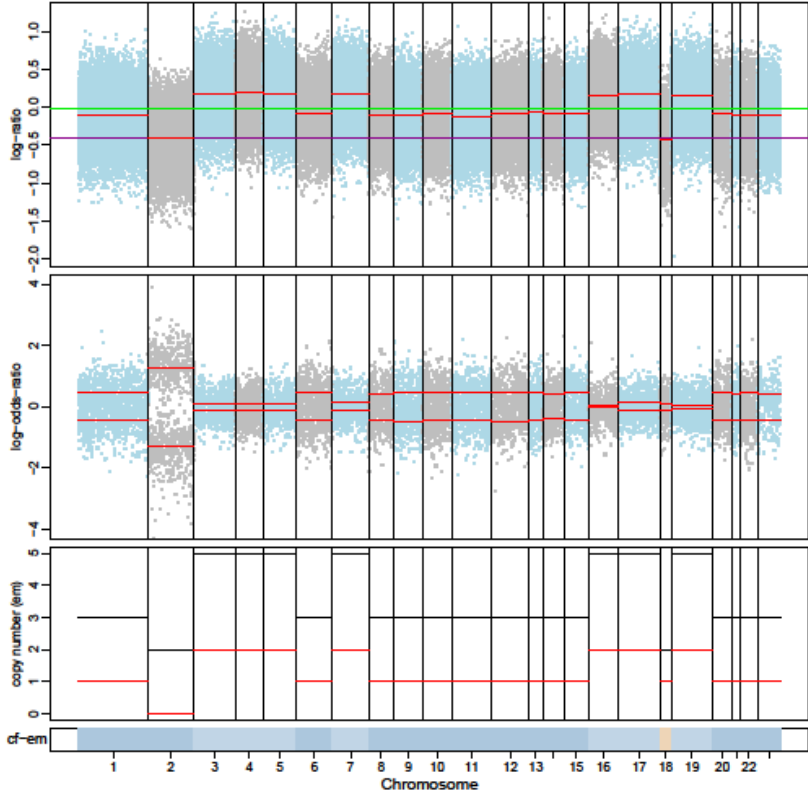

1036-P1

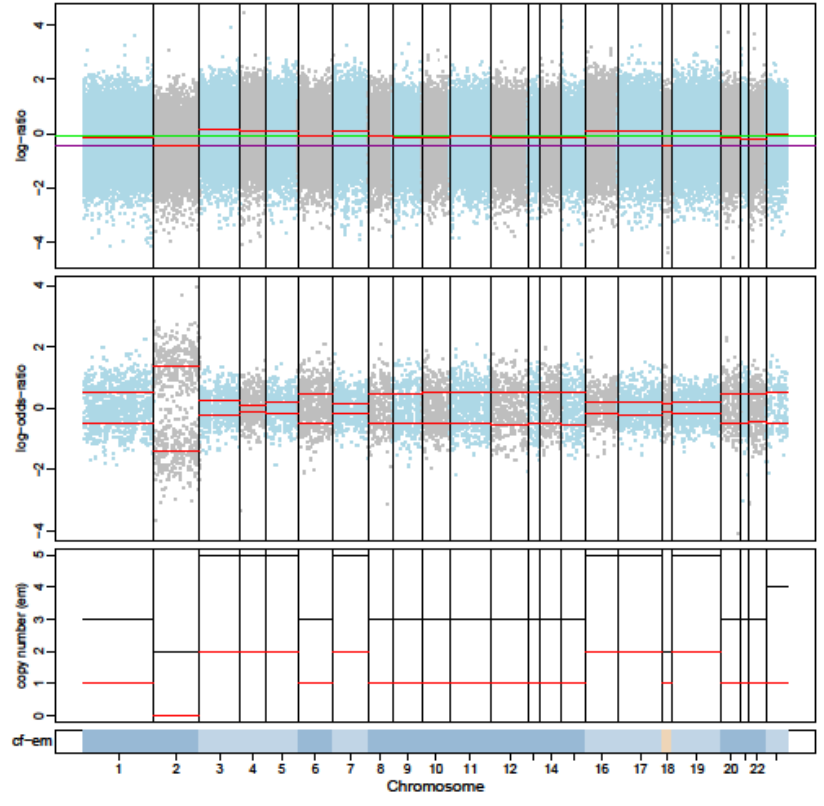

1036-P2

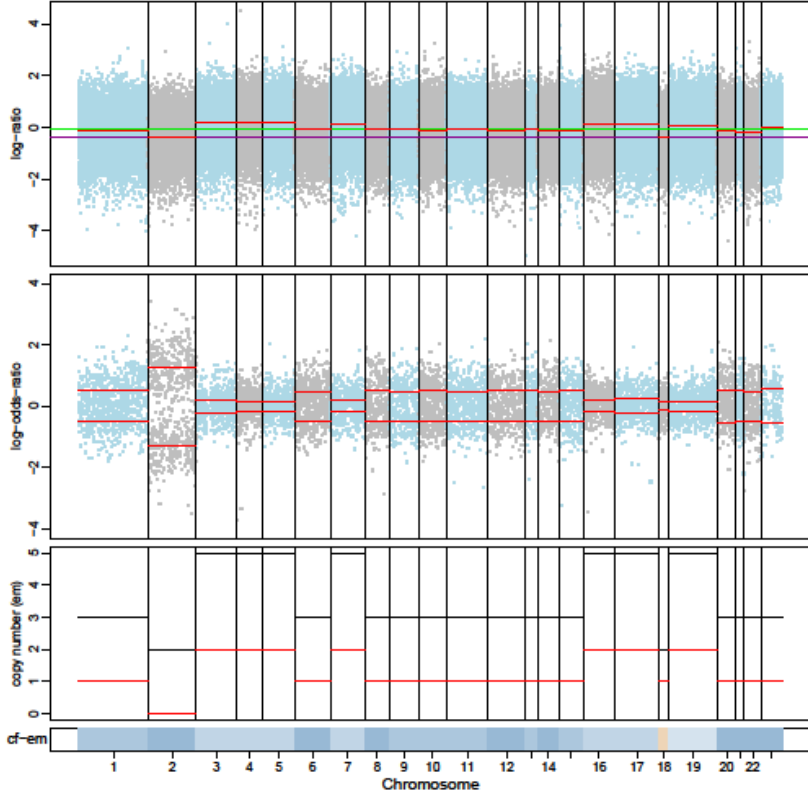

1049-P0

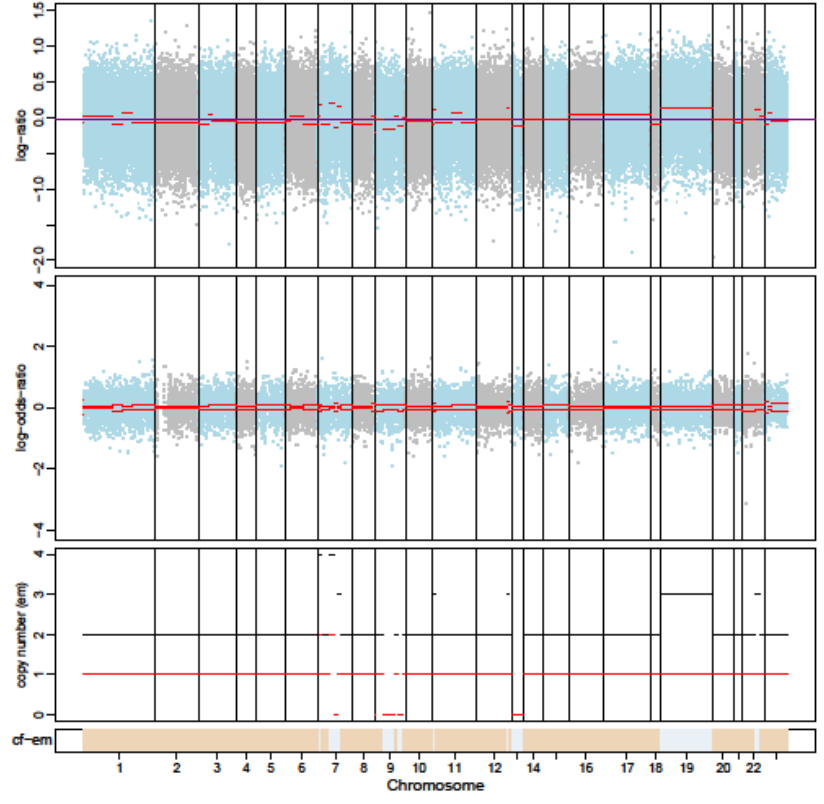

1049-P1

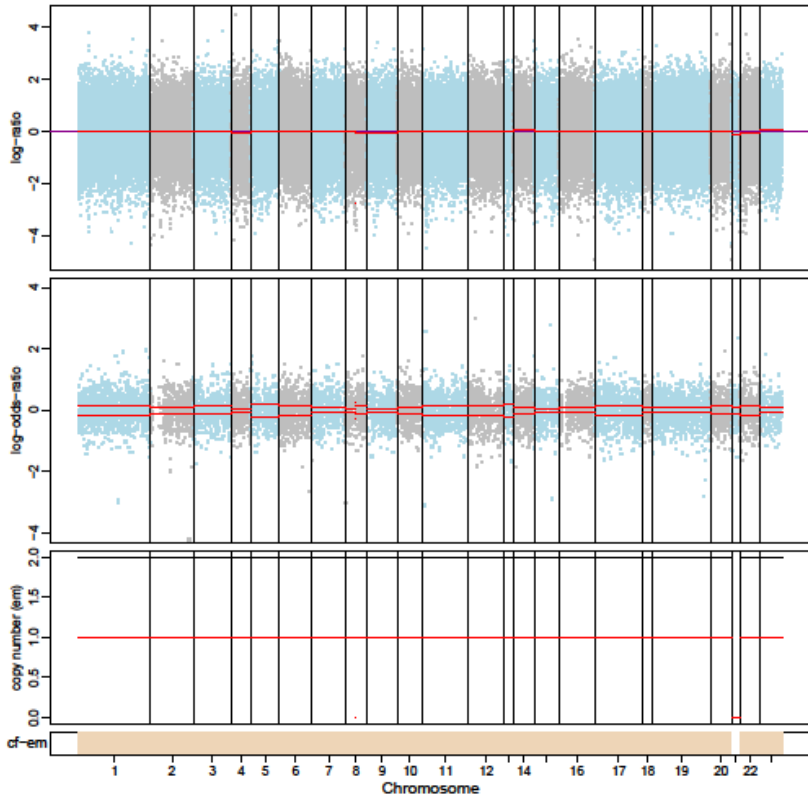

1049-P2

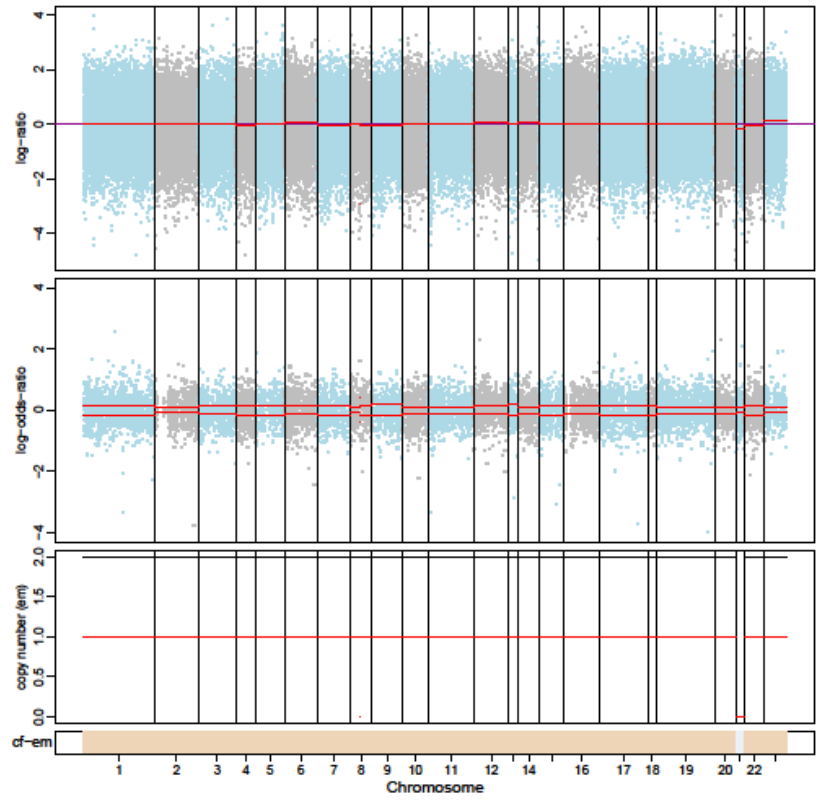

1099-P0

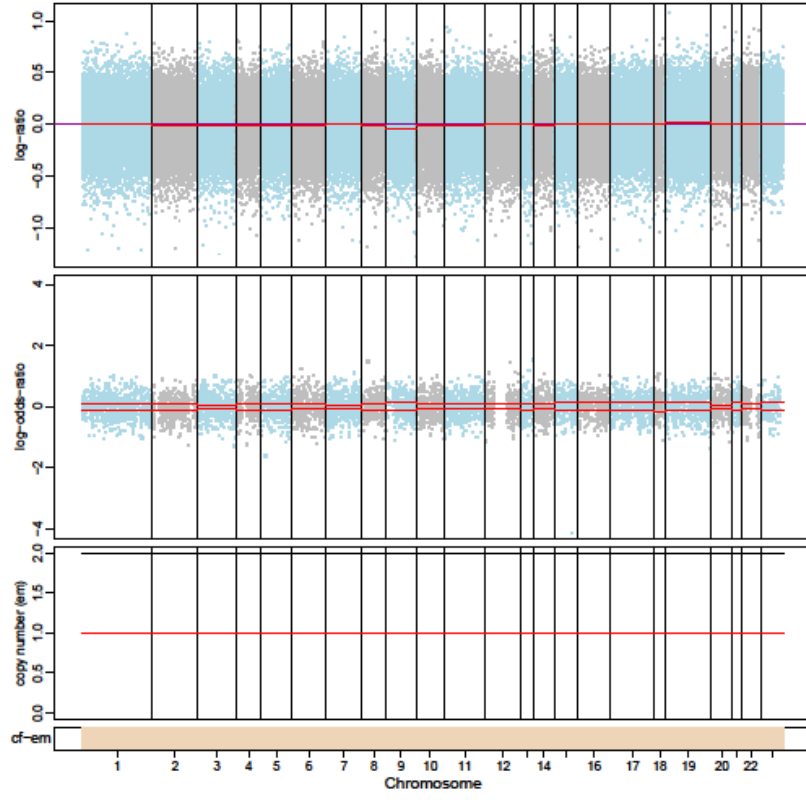

1099-P1

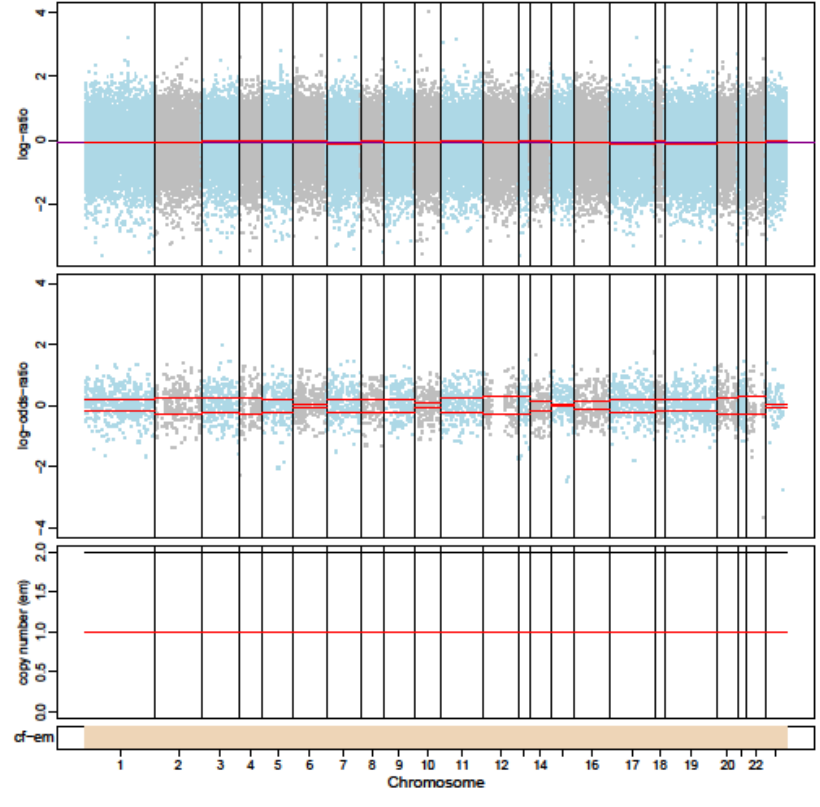

1099-P2

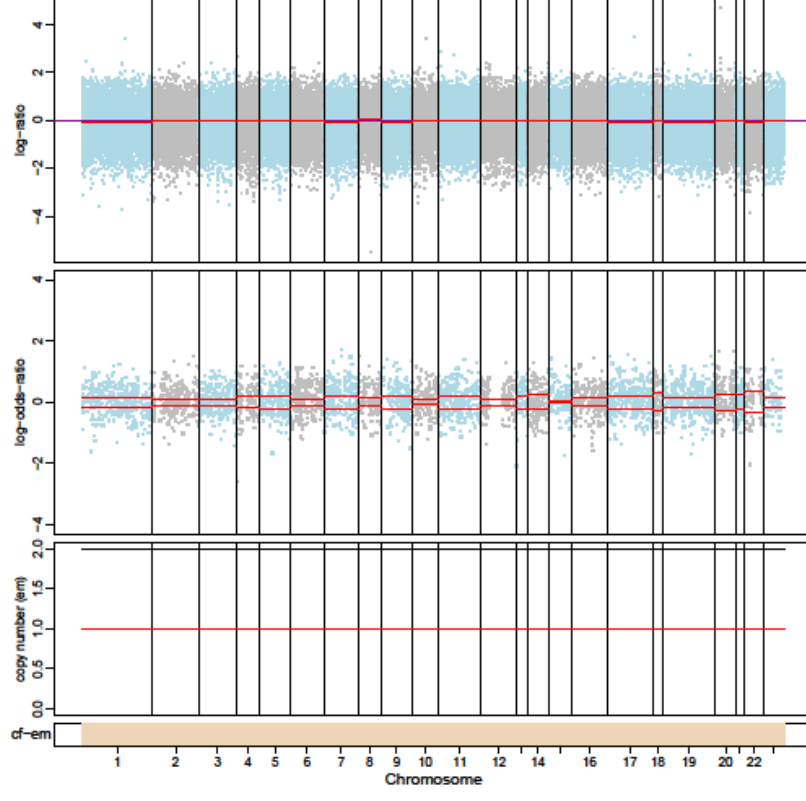

1143-P0

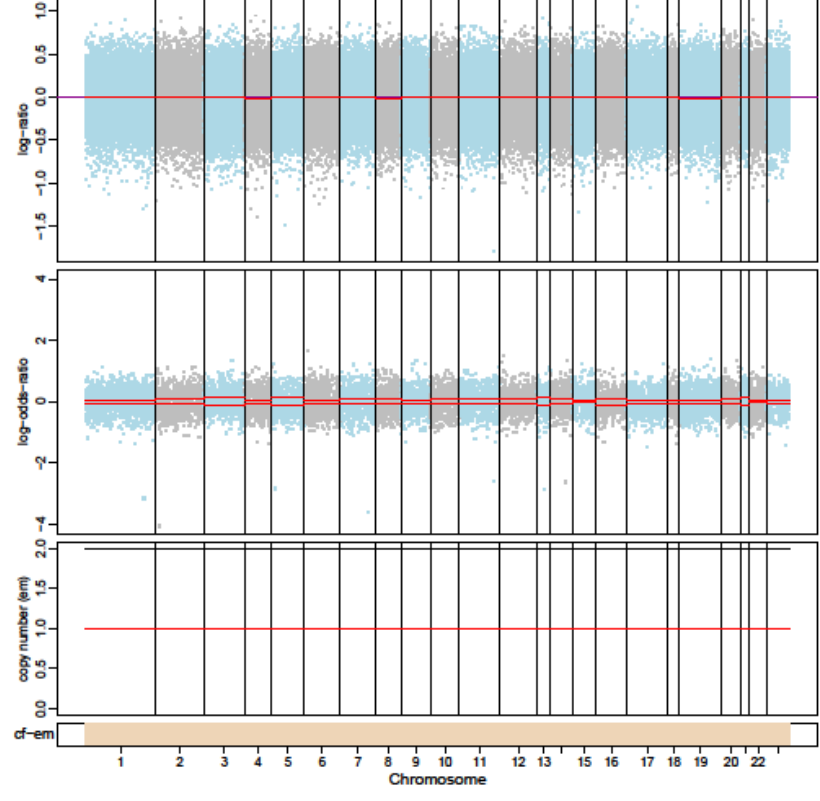

1143-P1

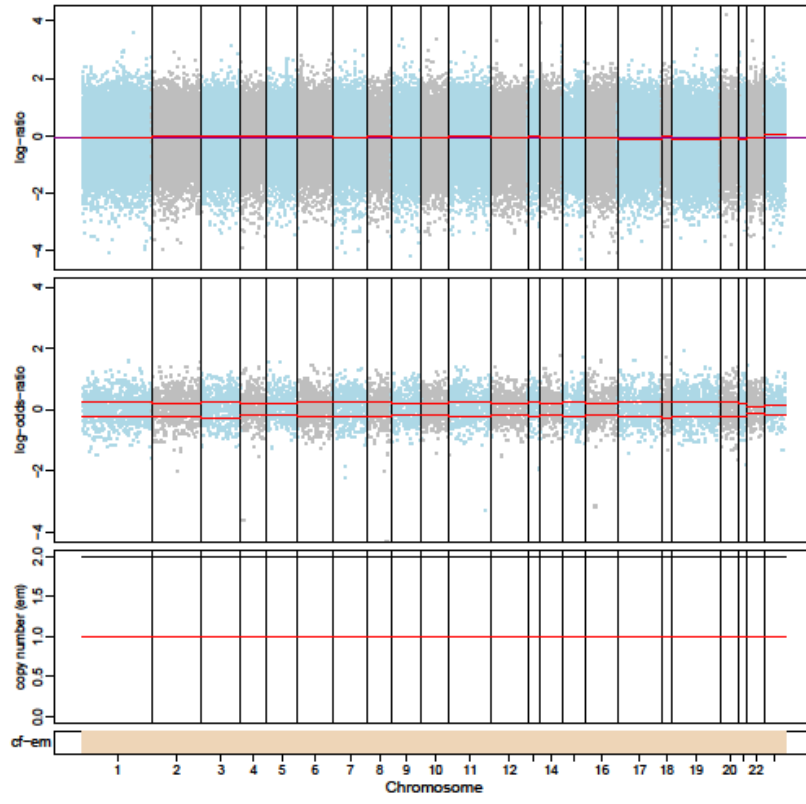

1143-P2

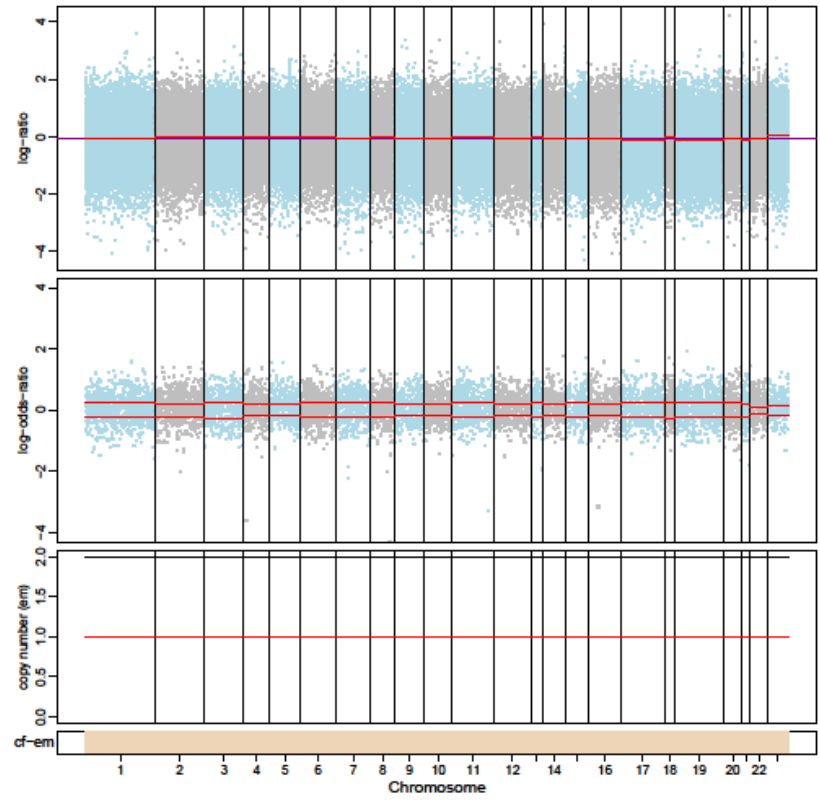

1145-P0

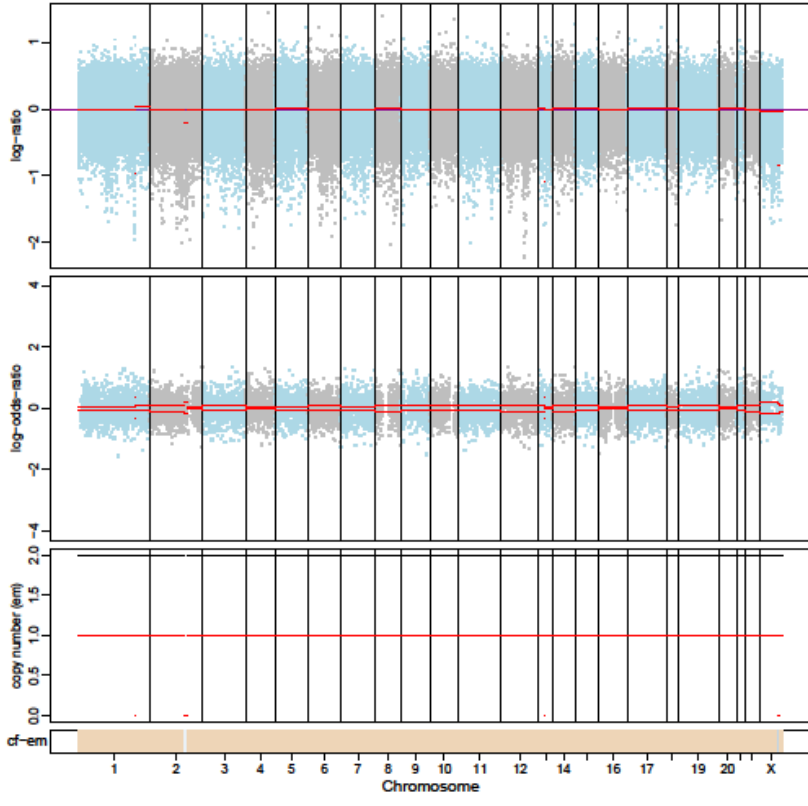

1145-P1

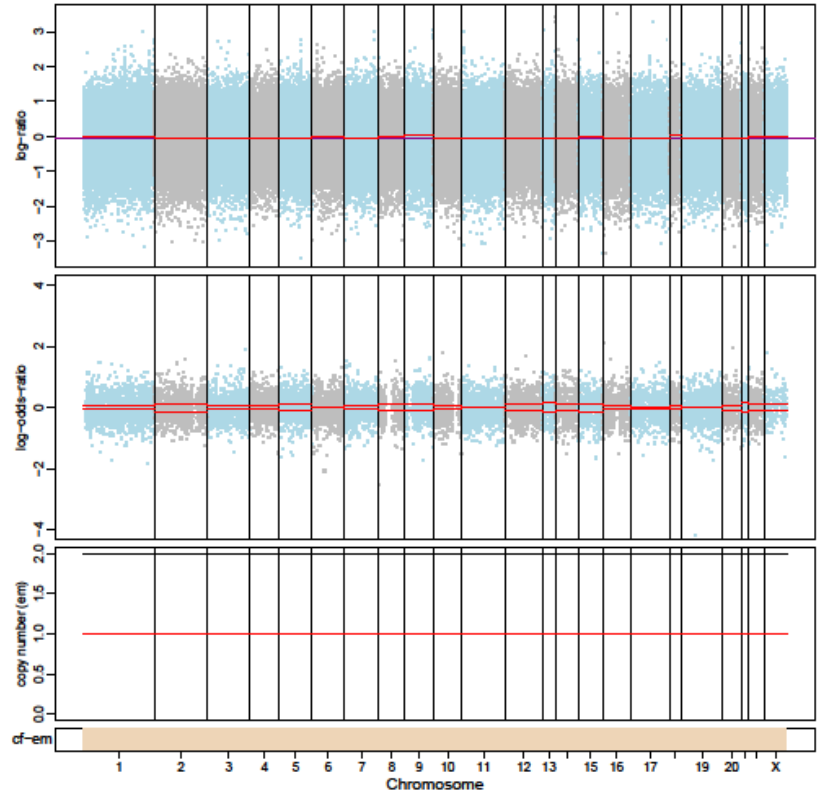

1145-P2

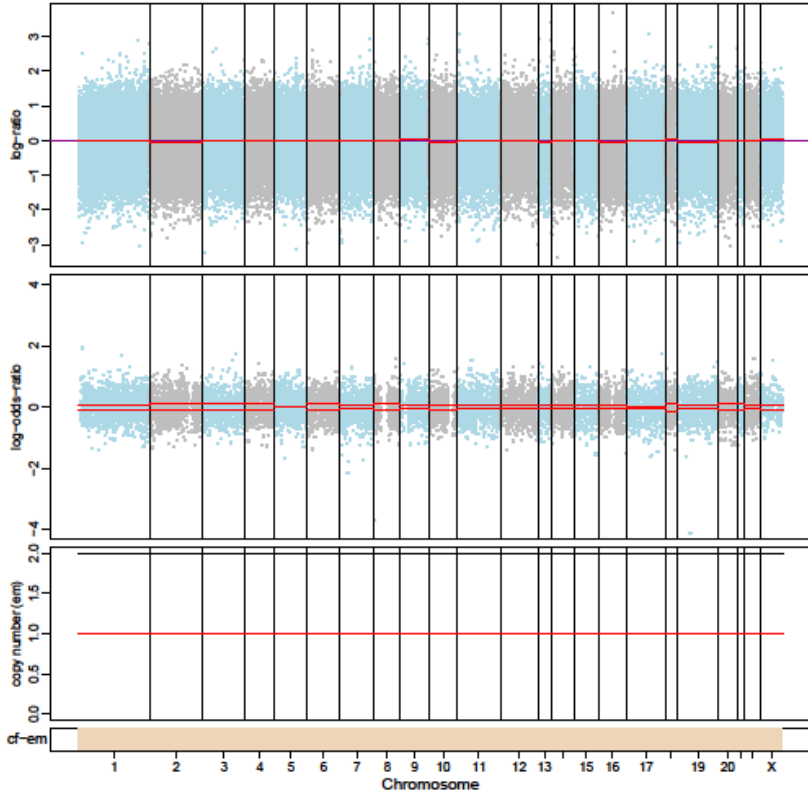

1147-P0

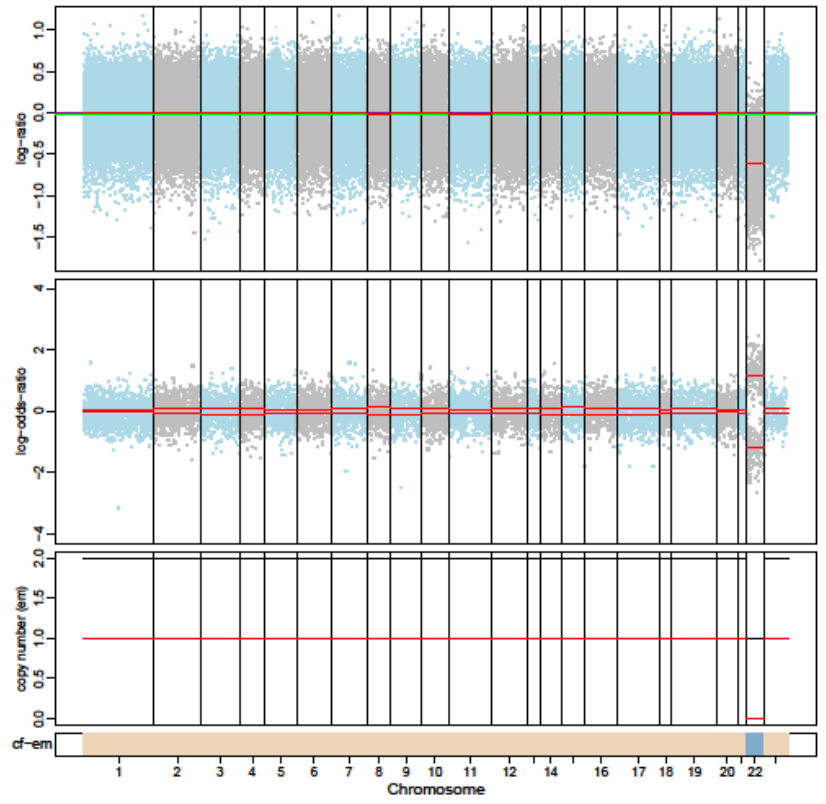

1147-P1

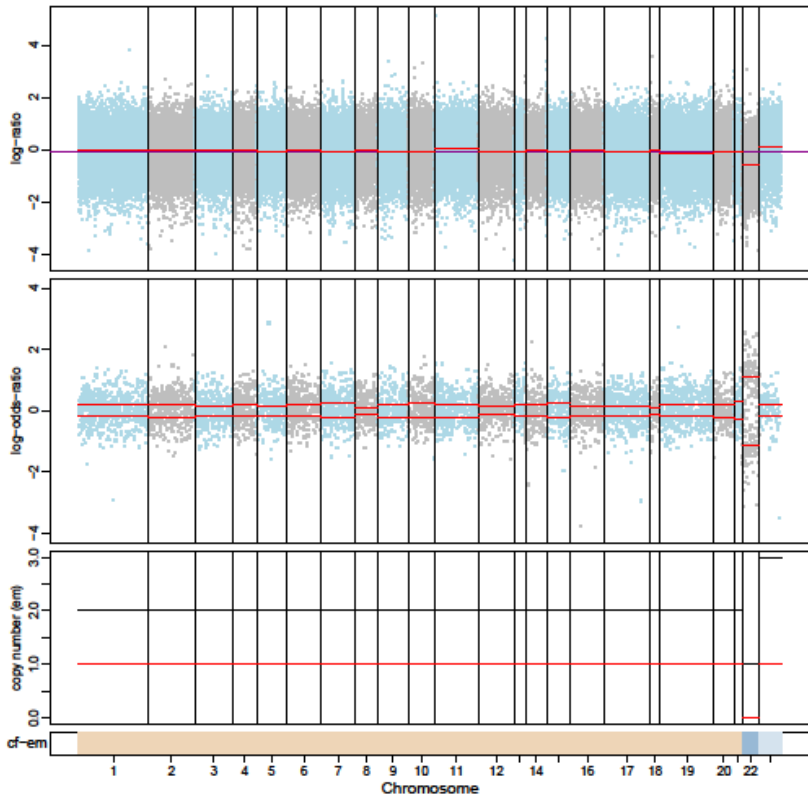

1147-P2

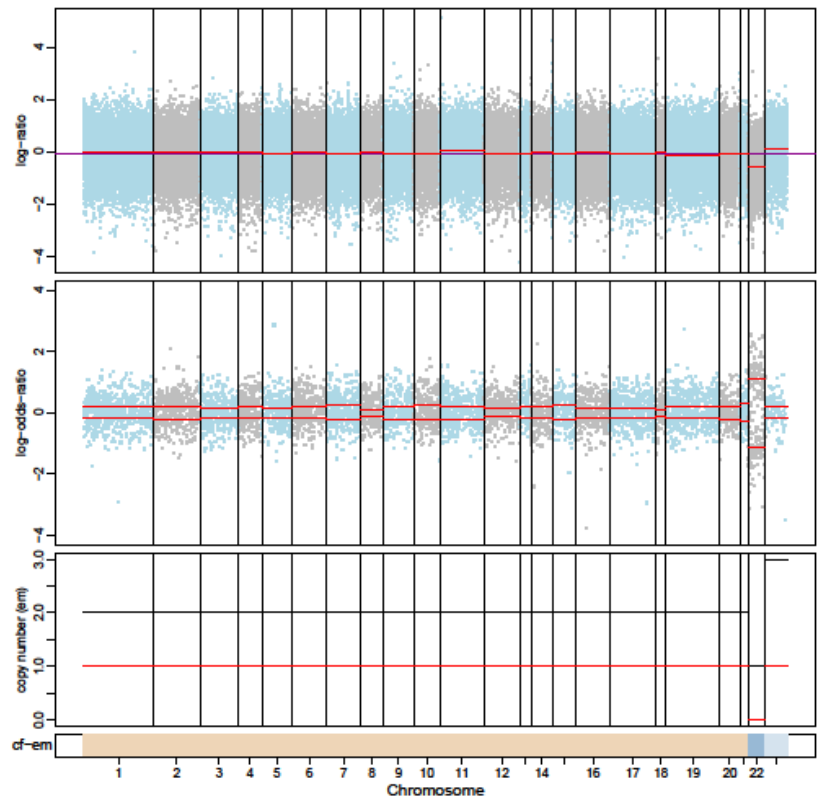



1148-P0

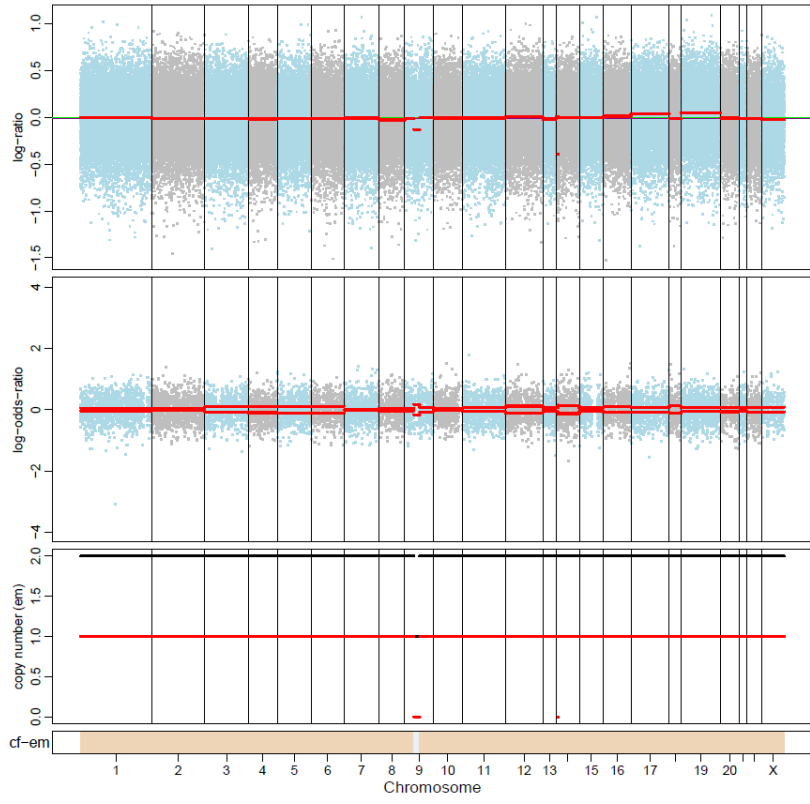

1148-P1

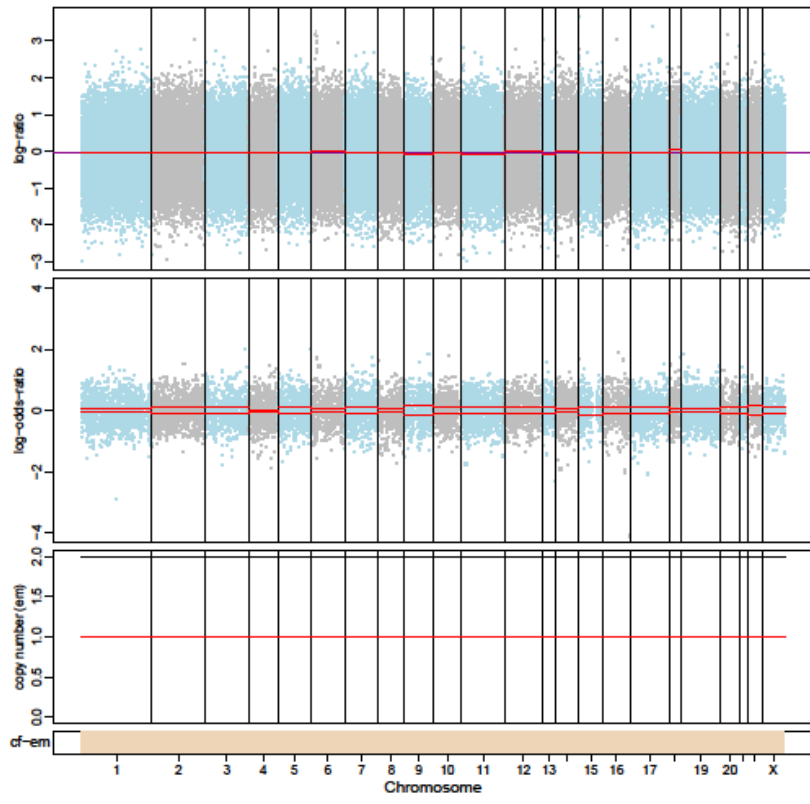

1148-P2

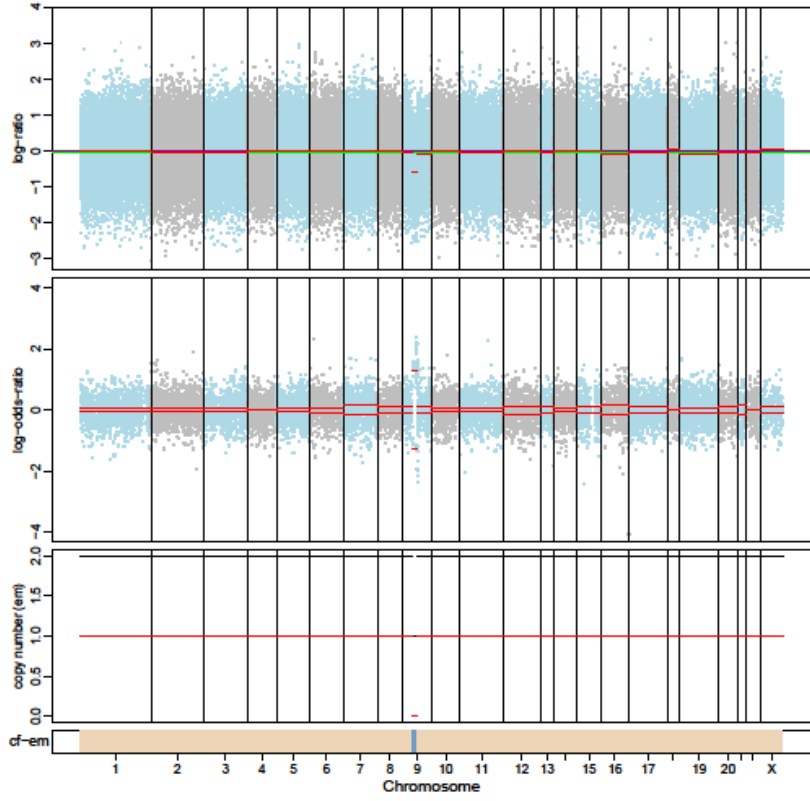

1149-P0

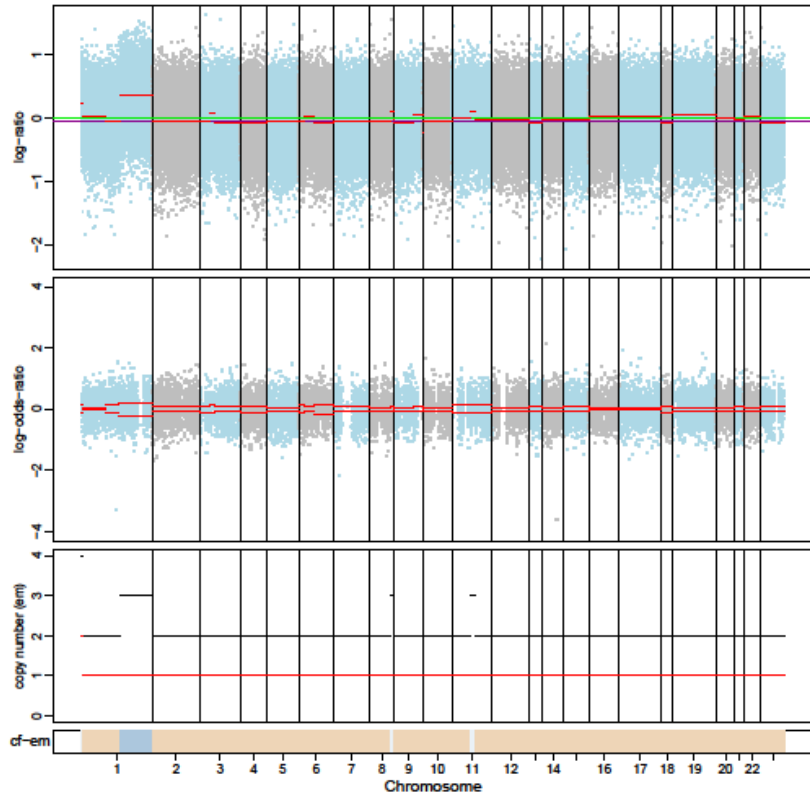

1149-P1

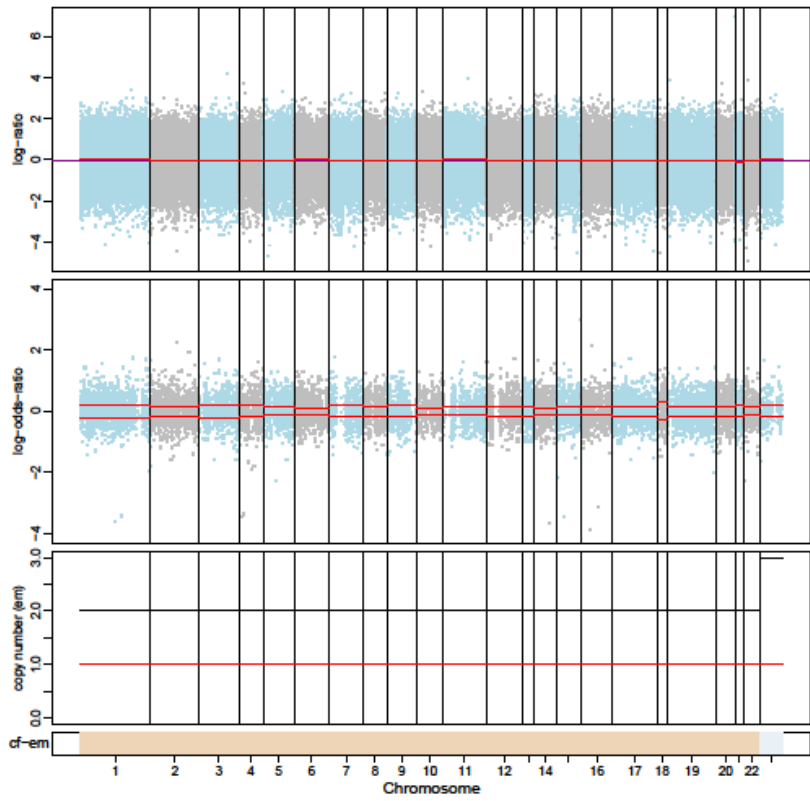

1149-P2

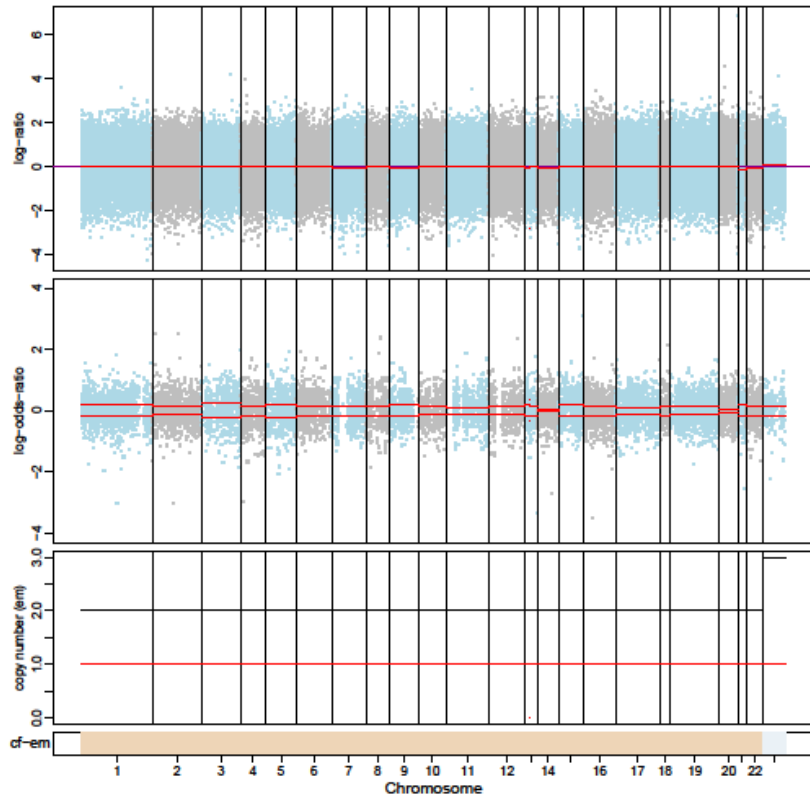

1150-P0

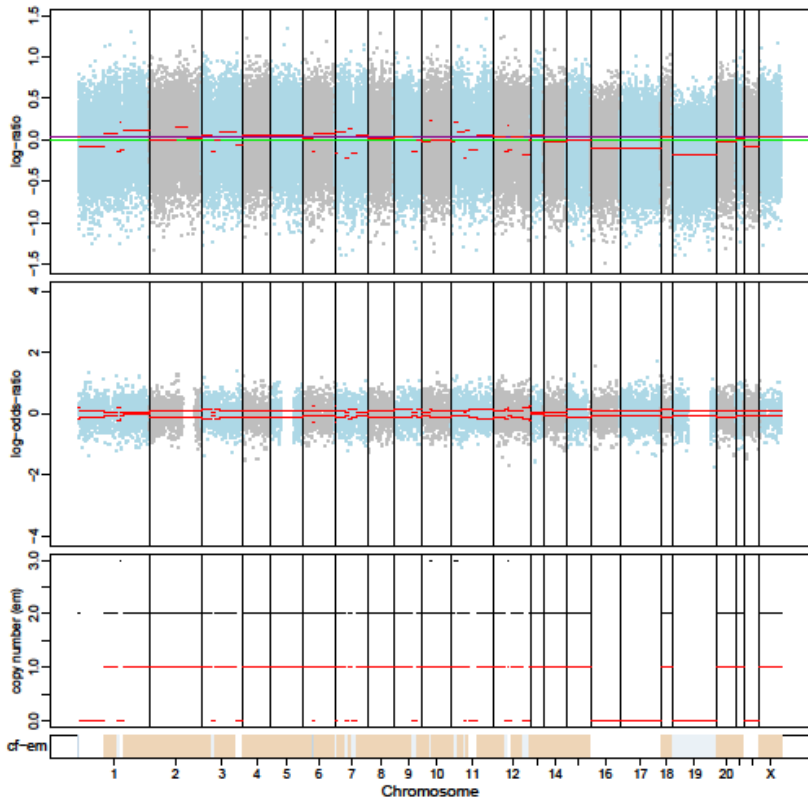

1150-P2

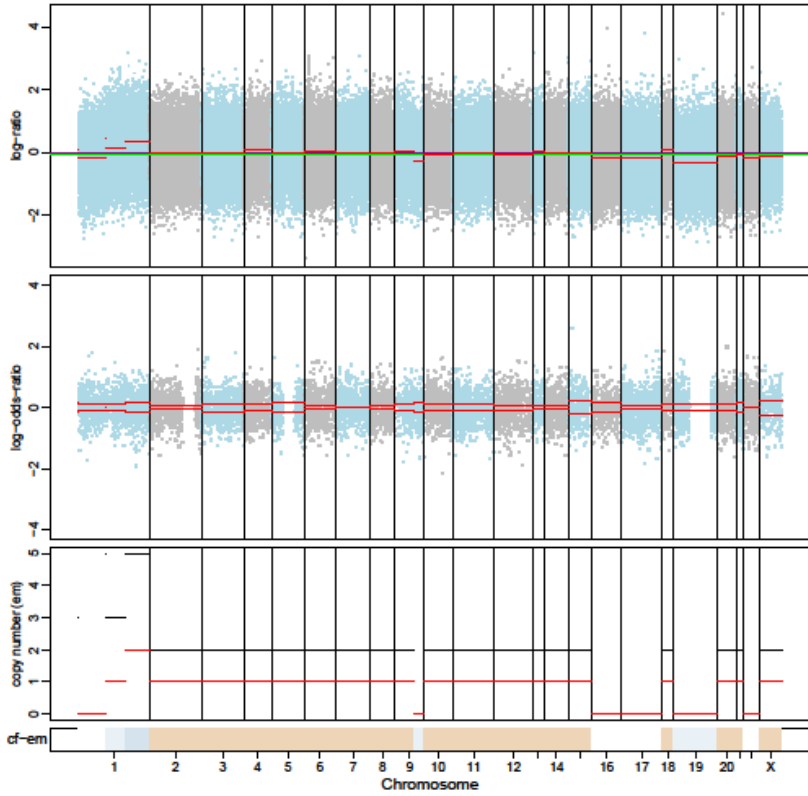

1151-P1

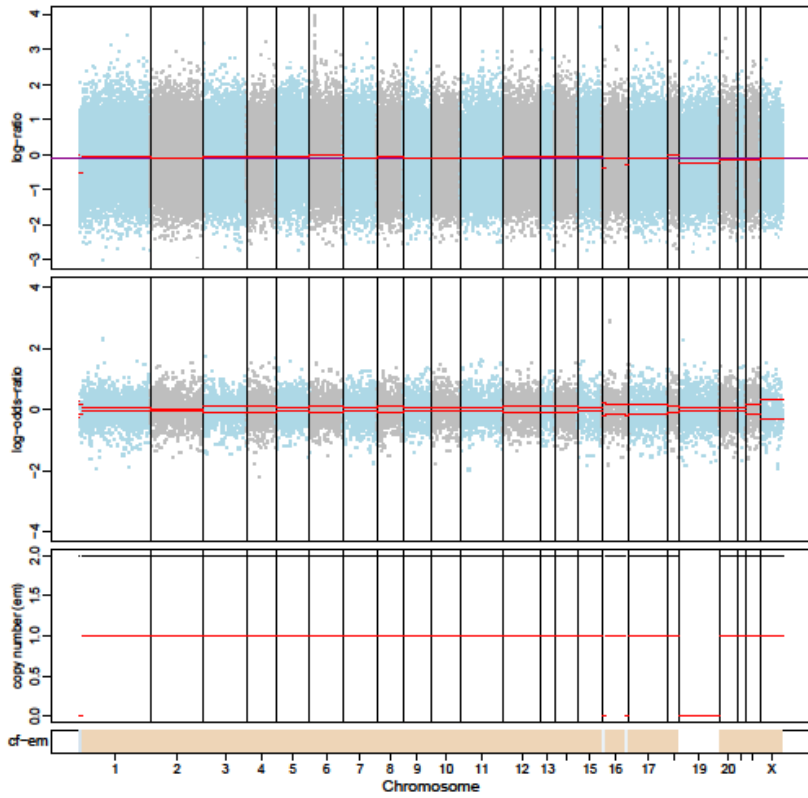

1150-P1

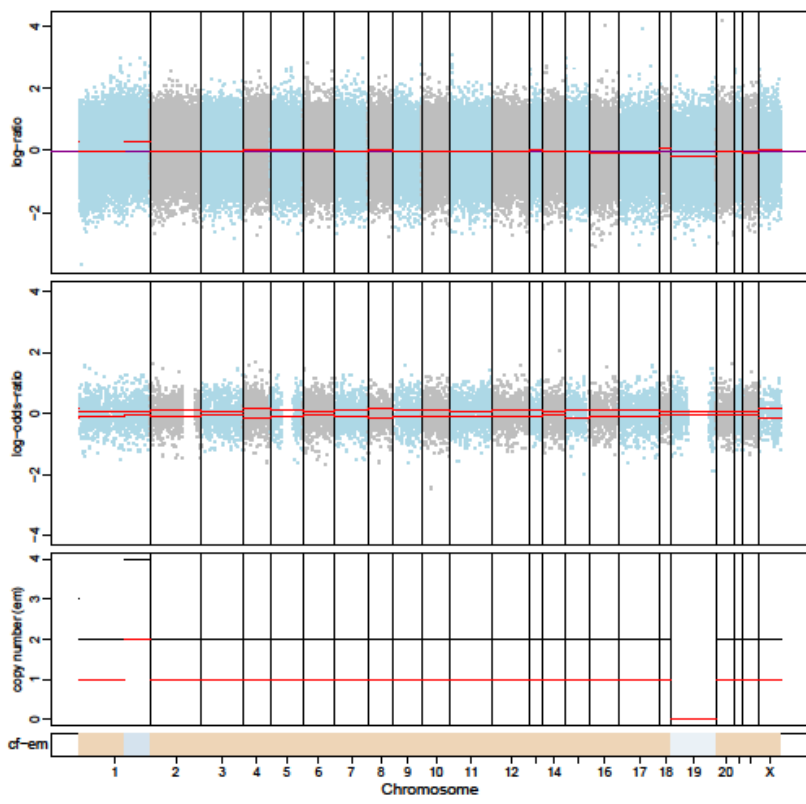

1151-P0

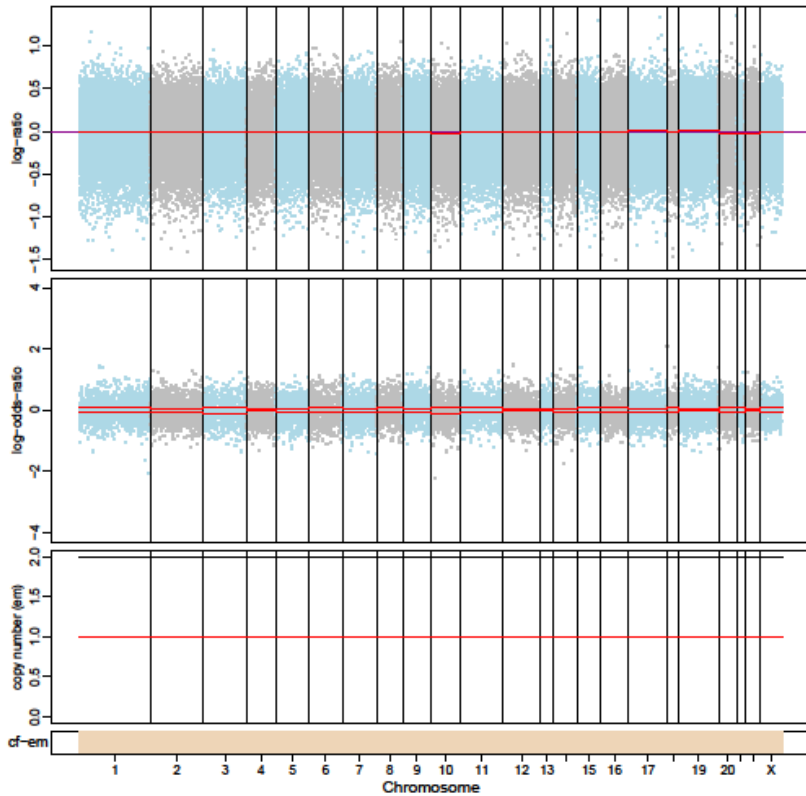

1151-P2

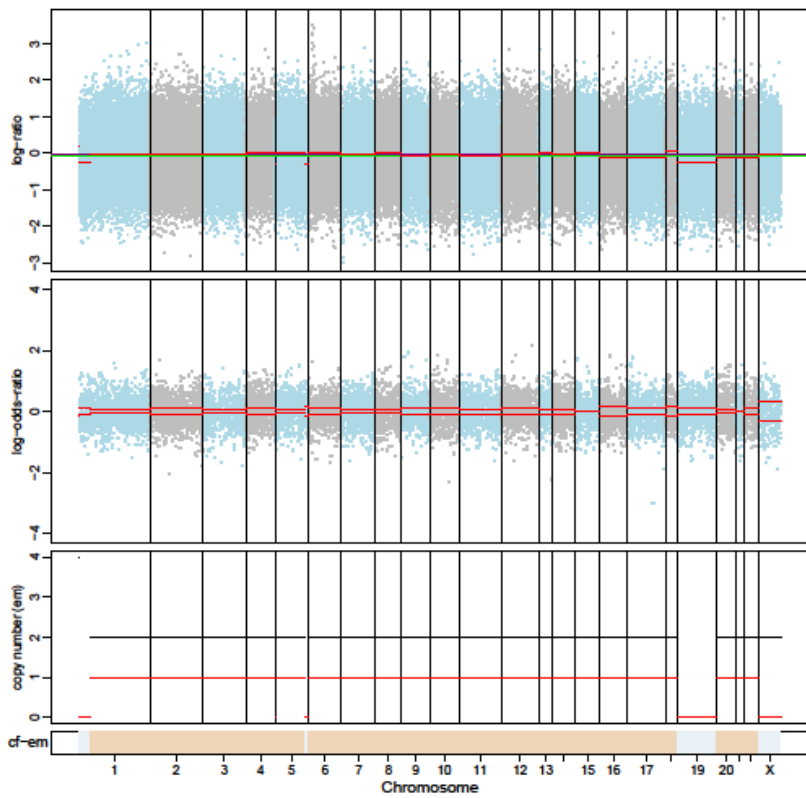

1153-P0

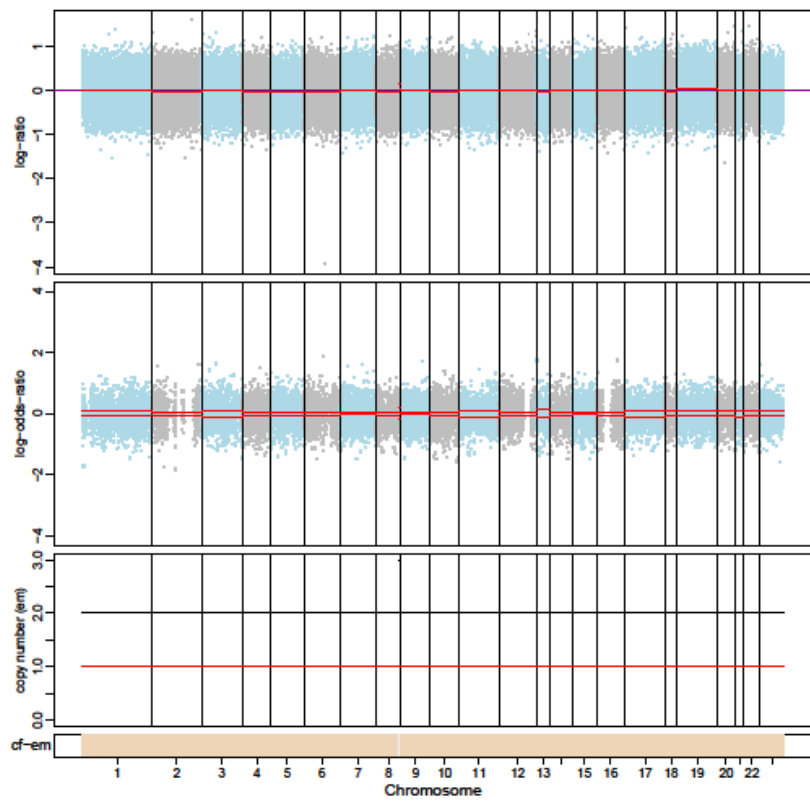

1153-P1

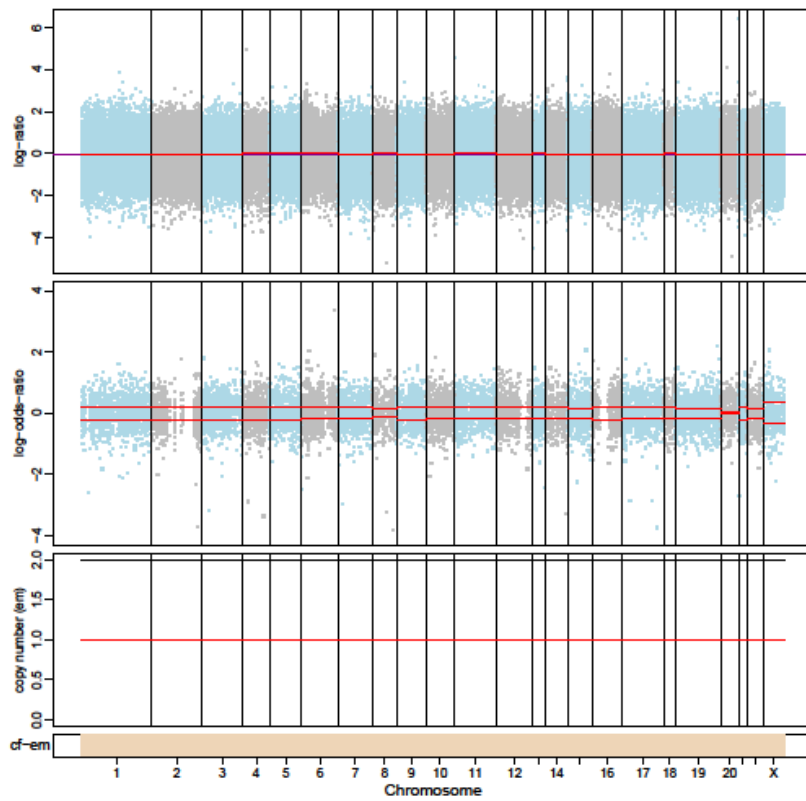

1153-P2

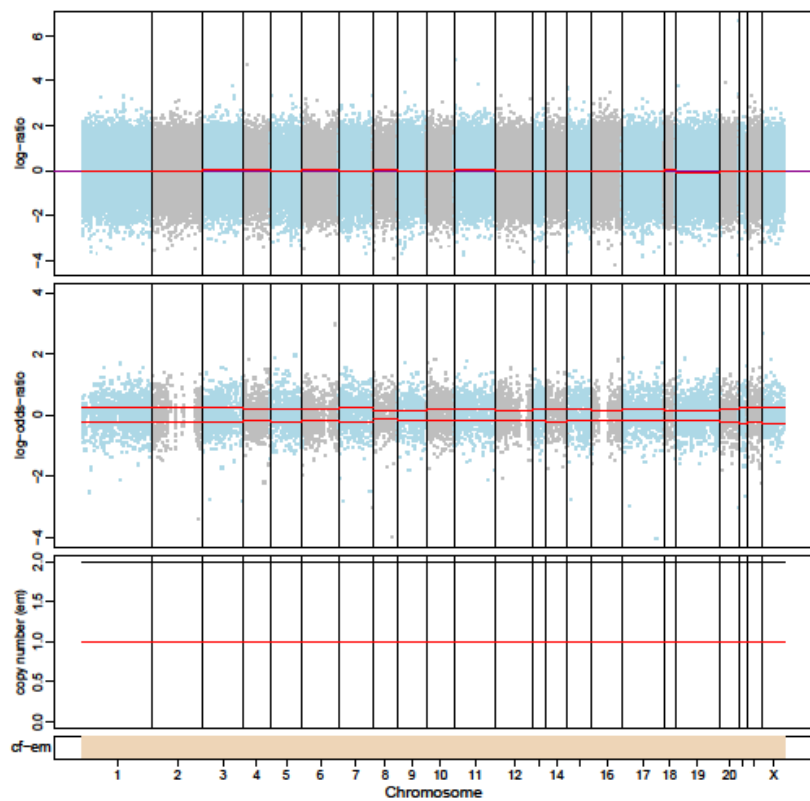

1154-P0

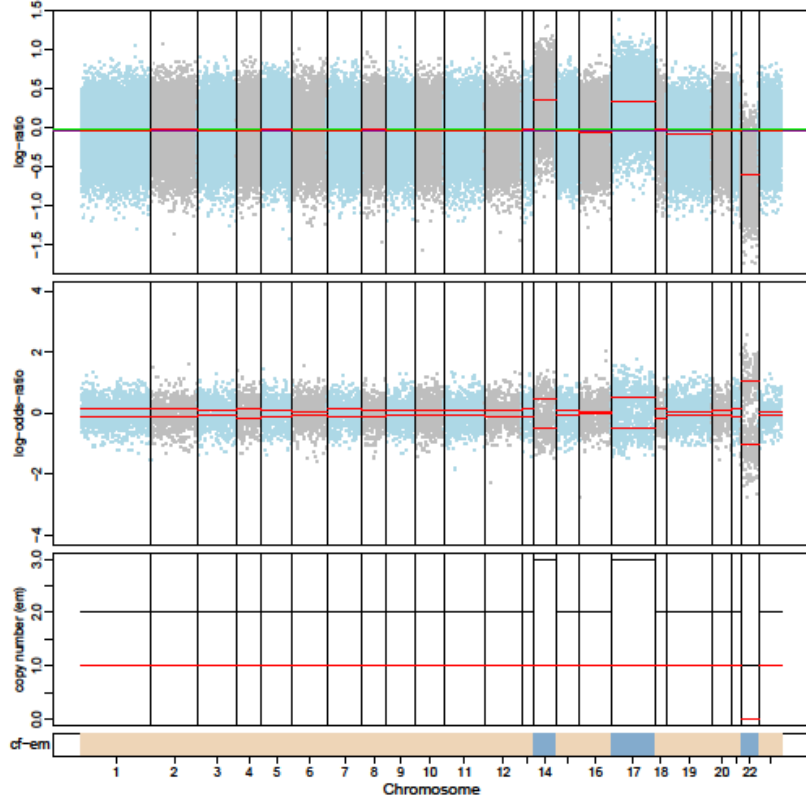

1154-P1

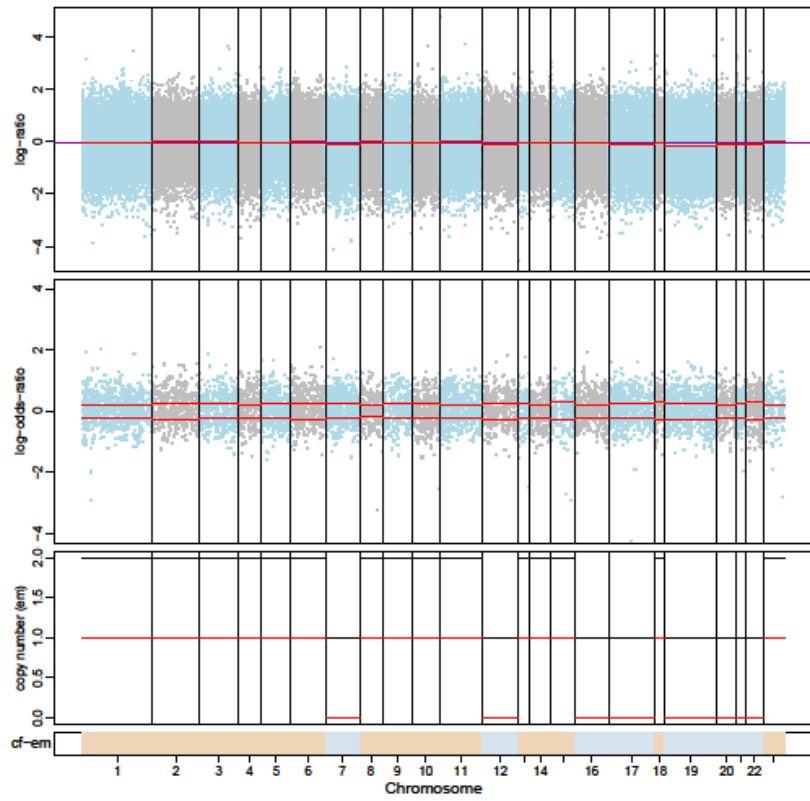

1154-P2

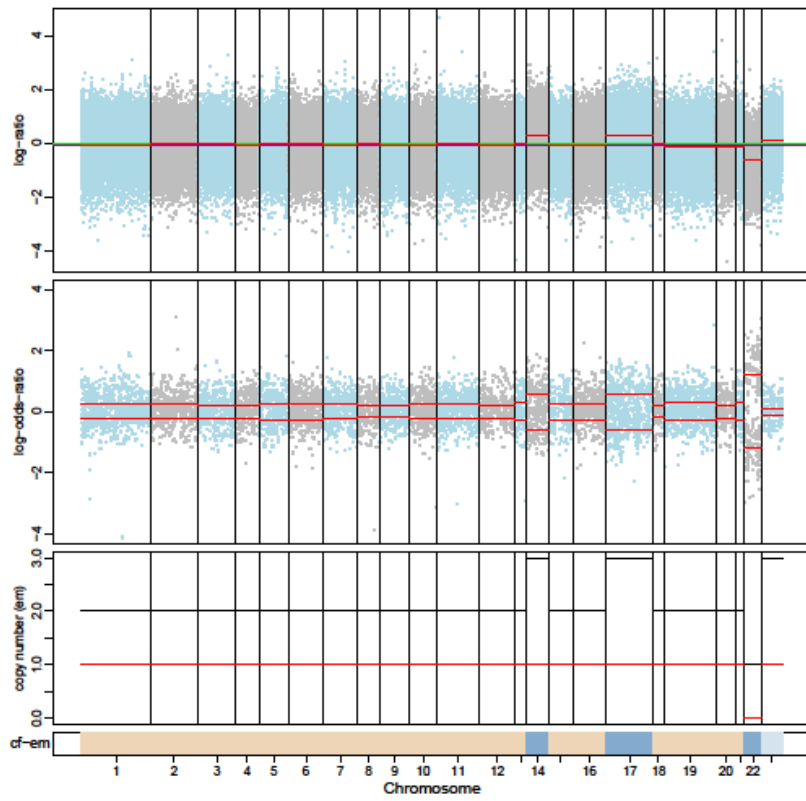

1155-P0

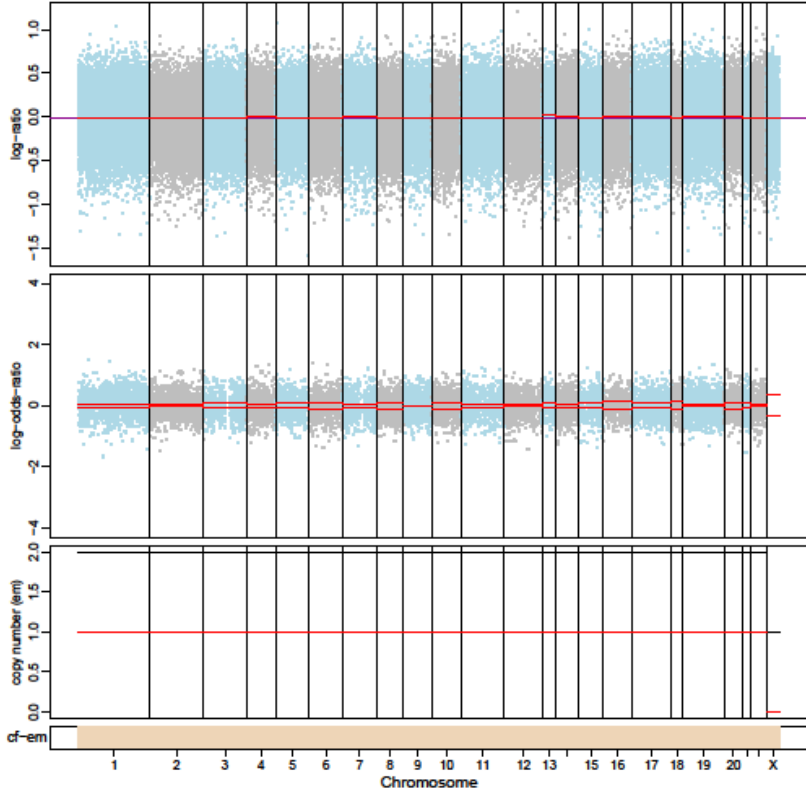

1155-P1

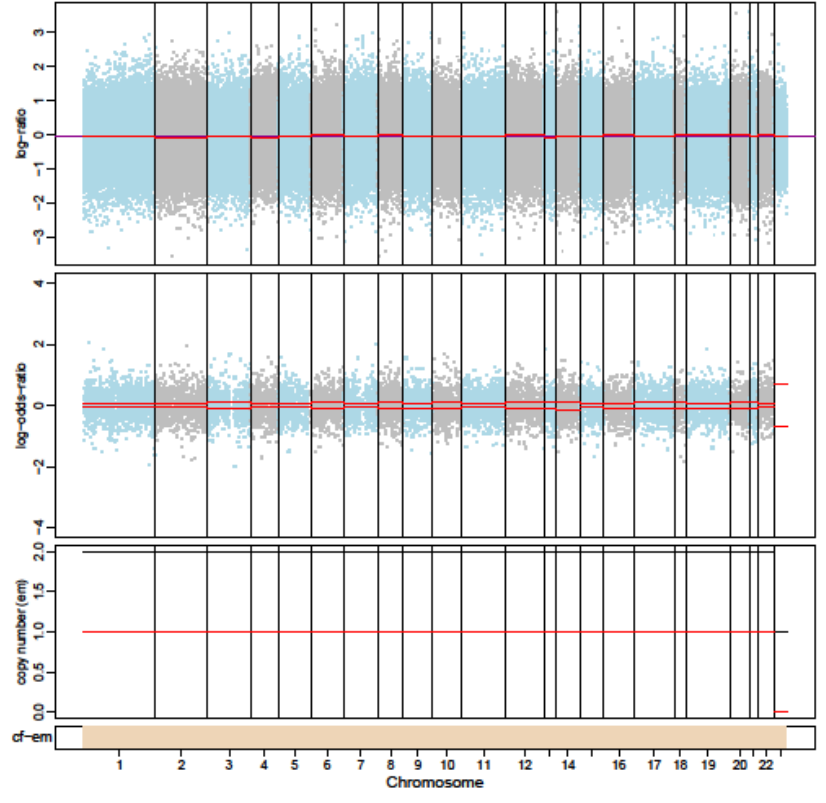

1155-P2

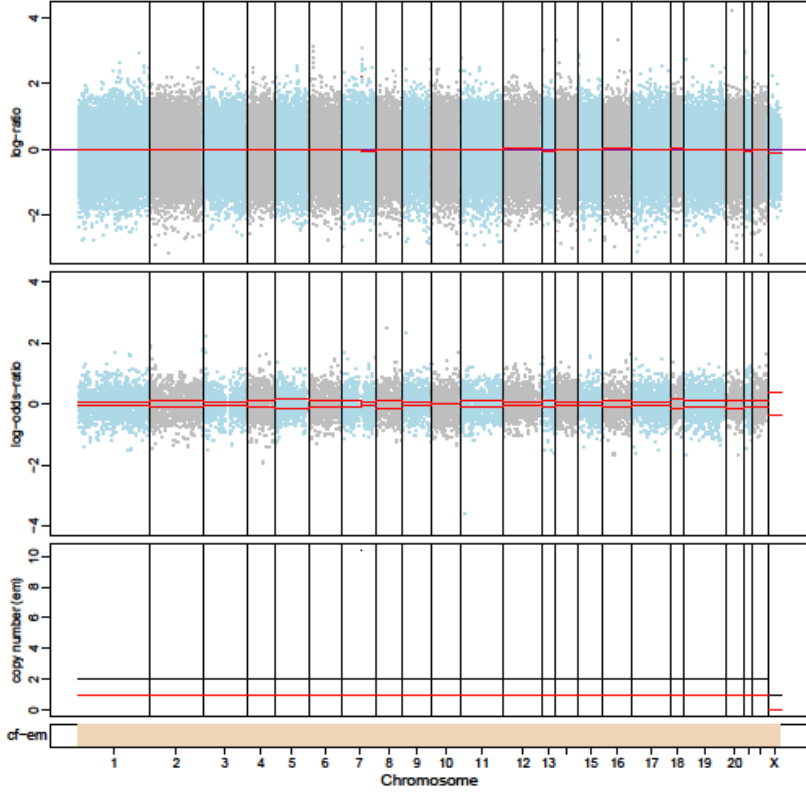

1156-P0

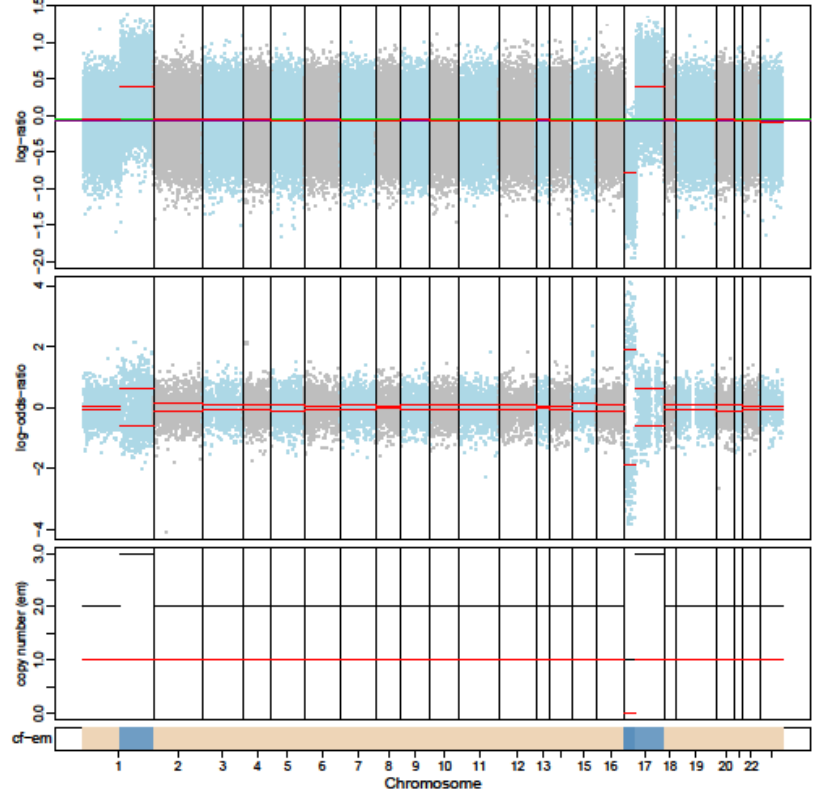

1156-P1

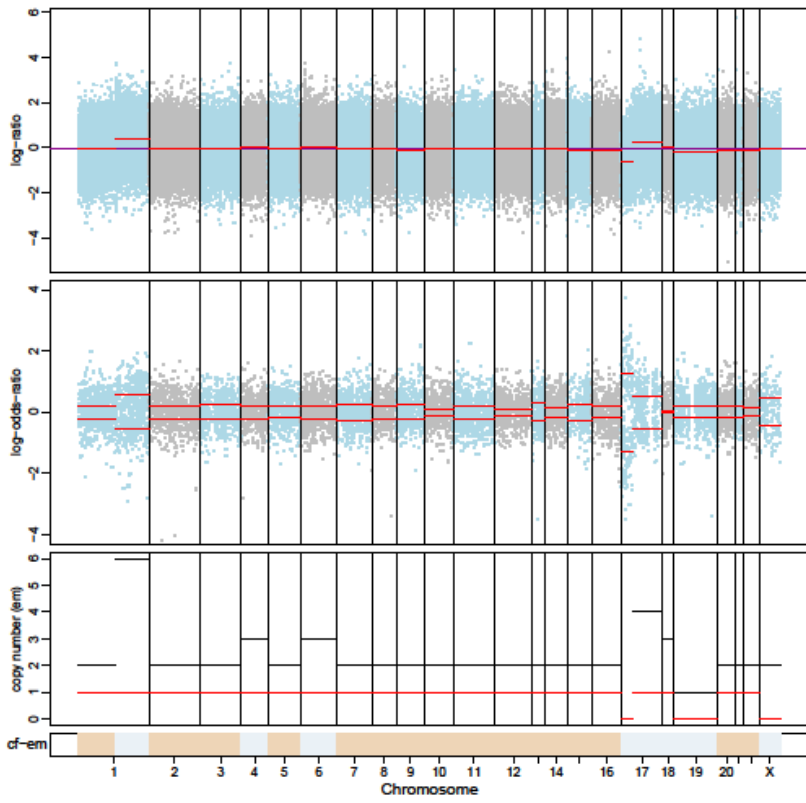

1156-P2

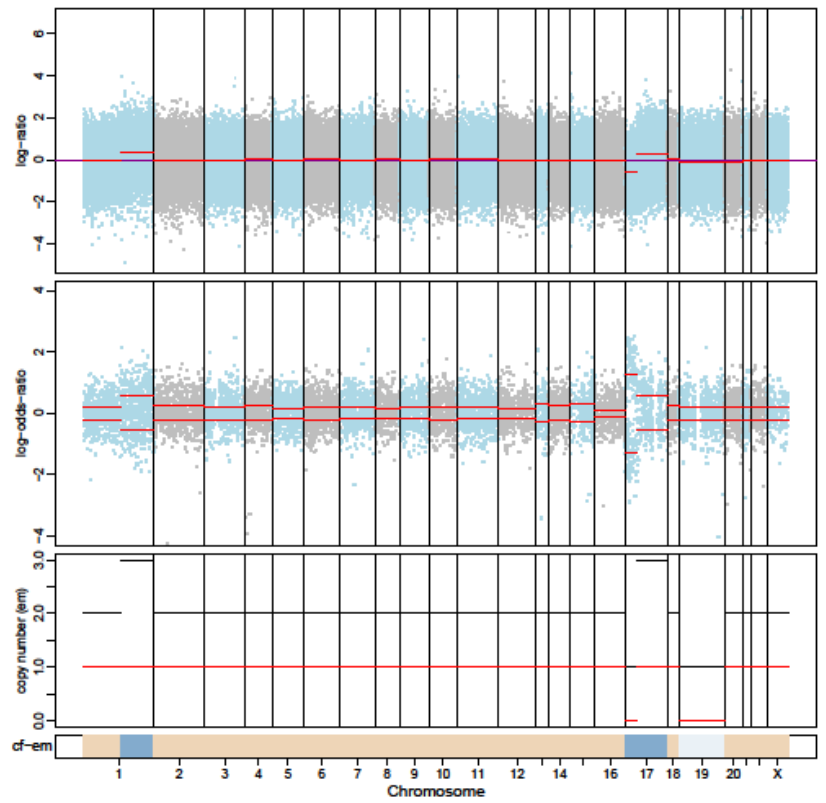

1159-P0

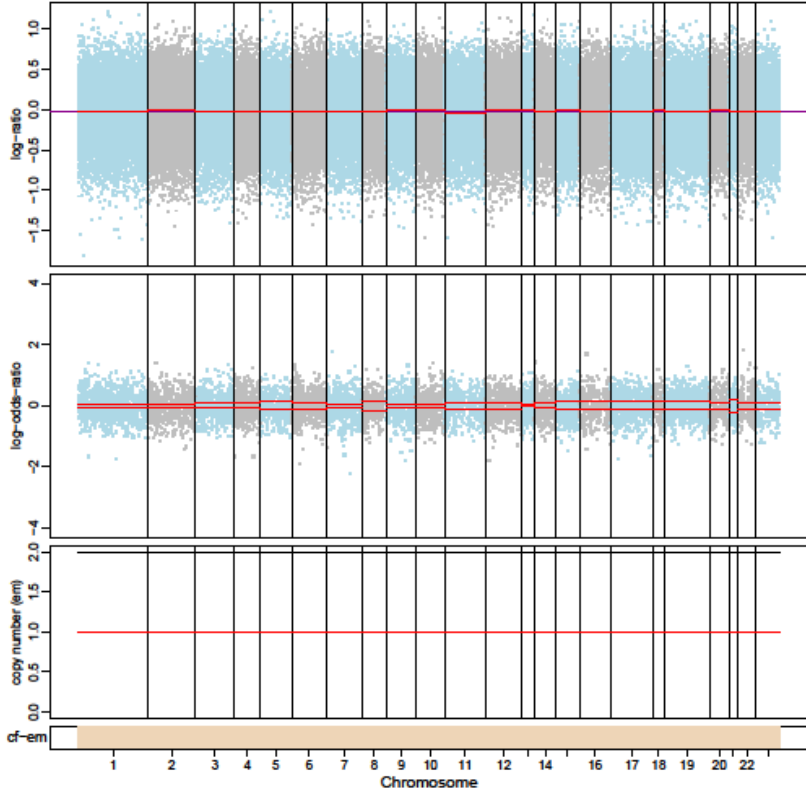

1159-P1

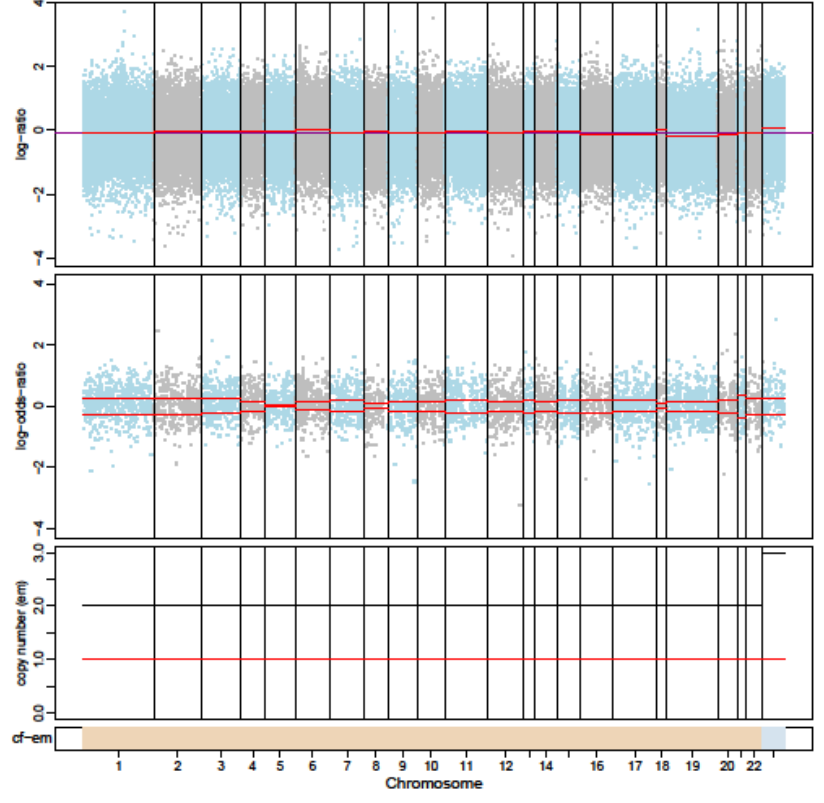

1159-P2

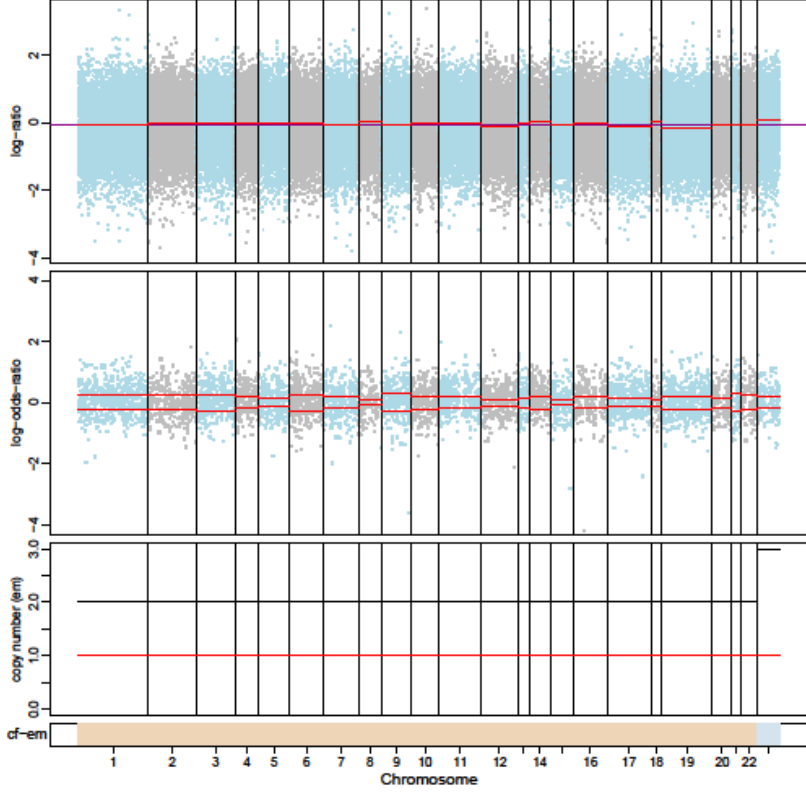

1161-P0

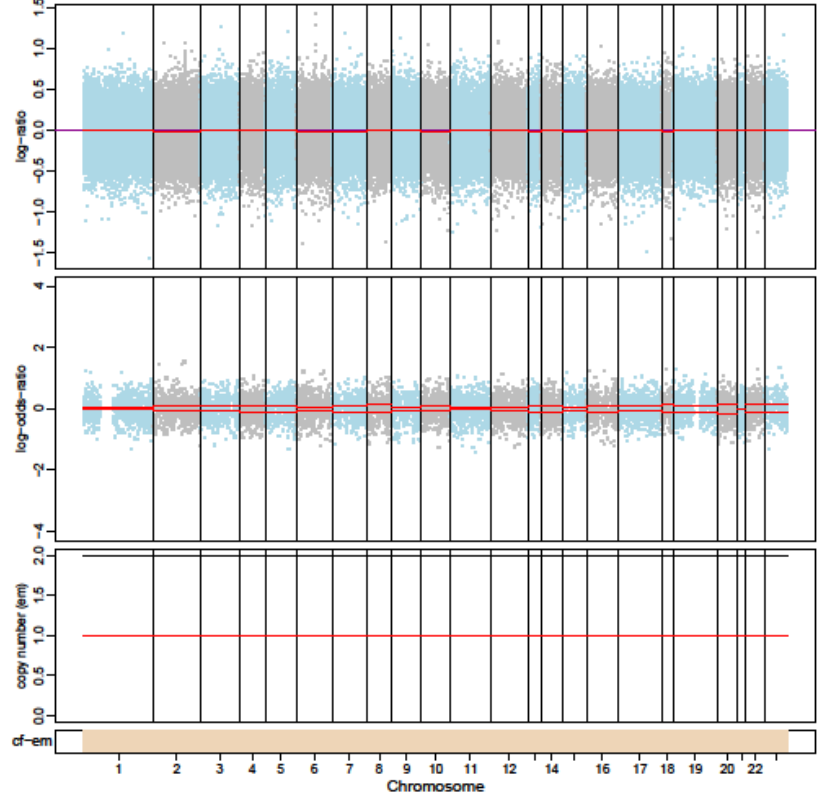

1161-P1

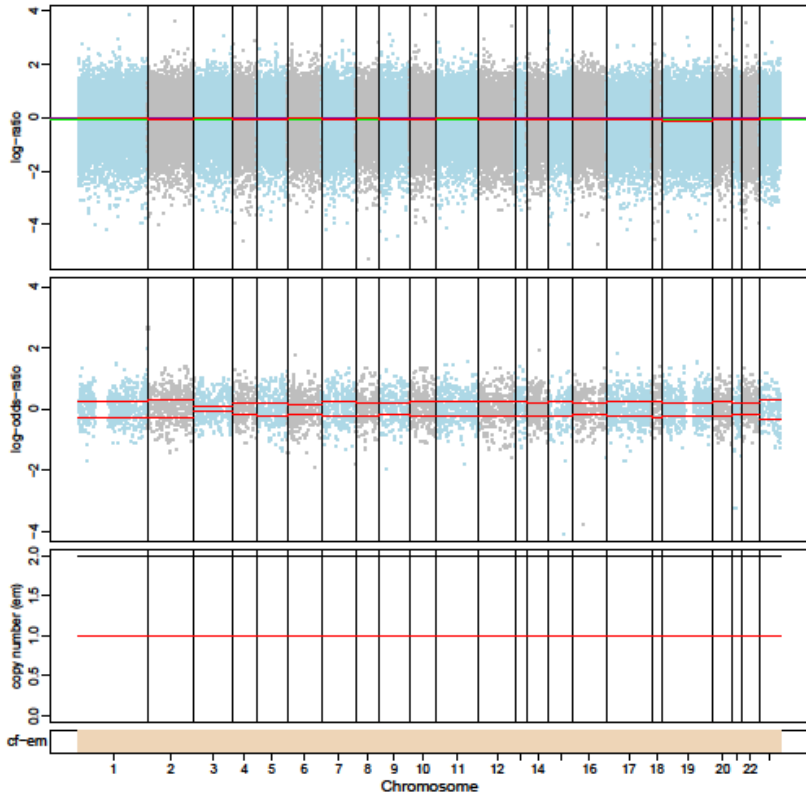

1161-P2

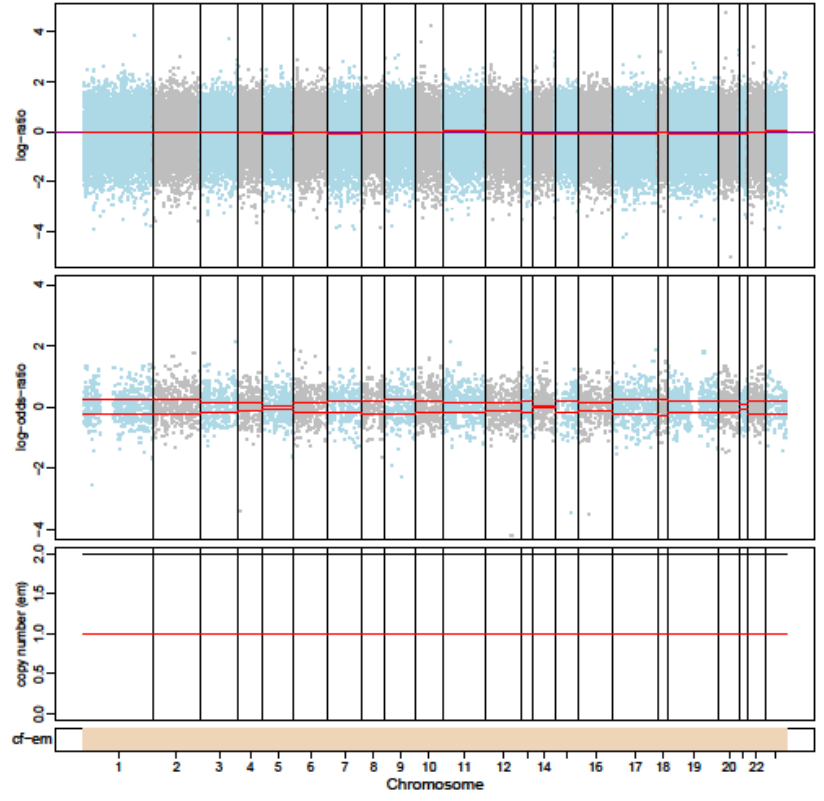

1164-P0

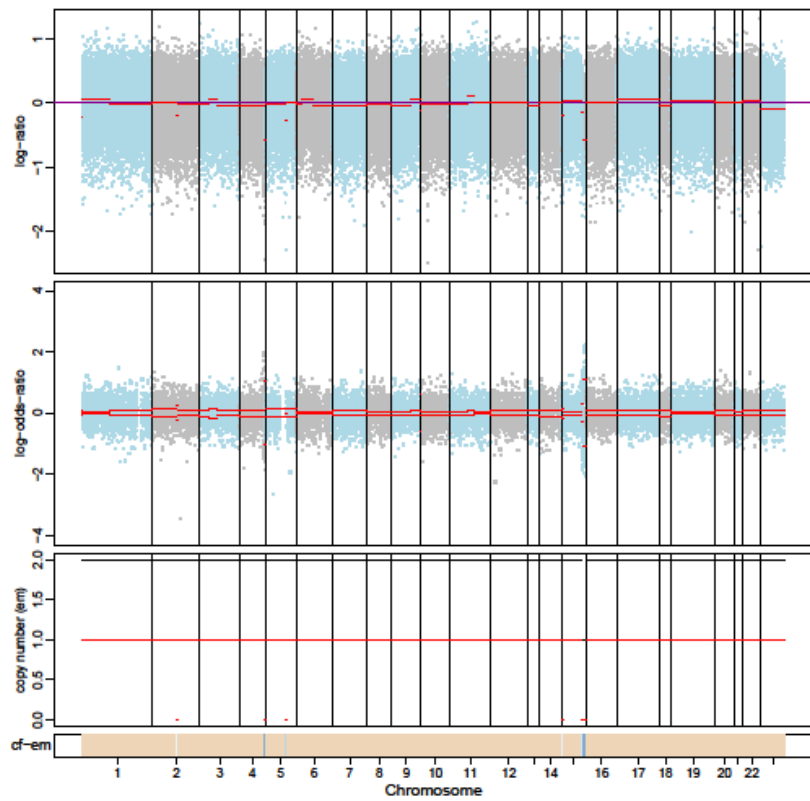

1164-P1

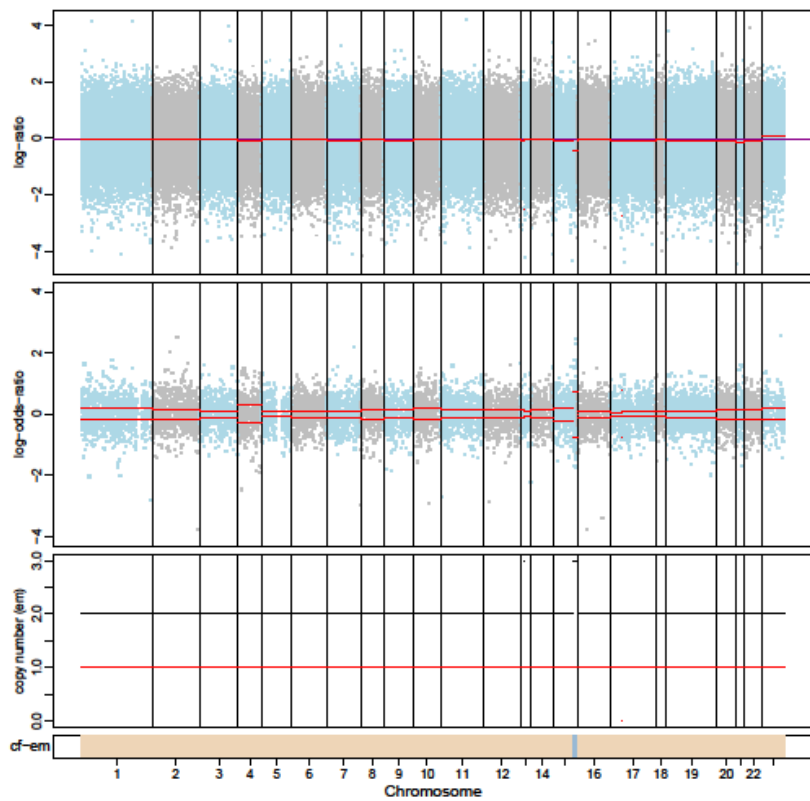

1164-P2

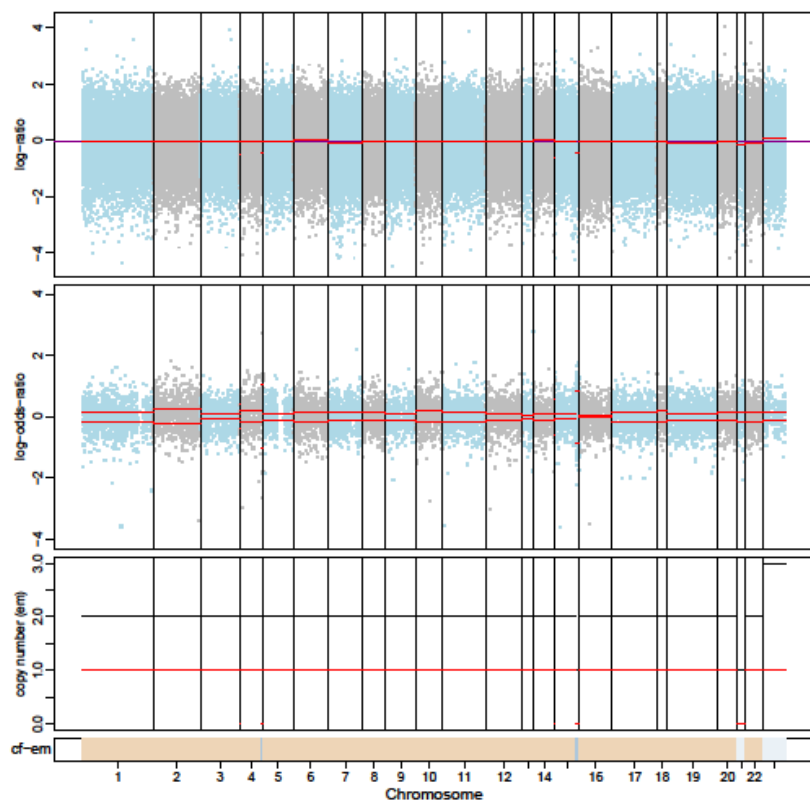

1165-P0

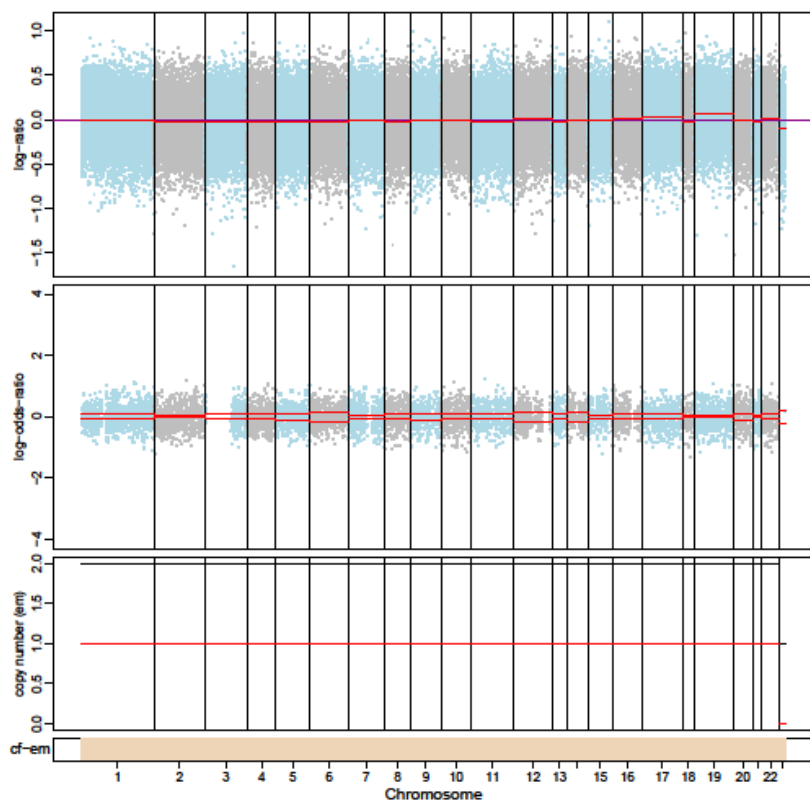

1165-P1

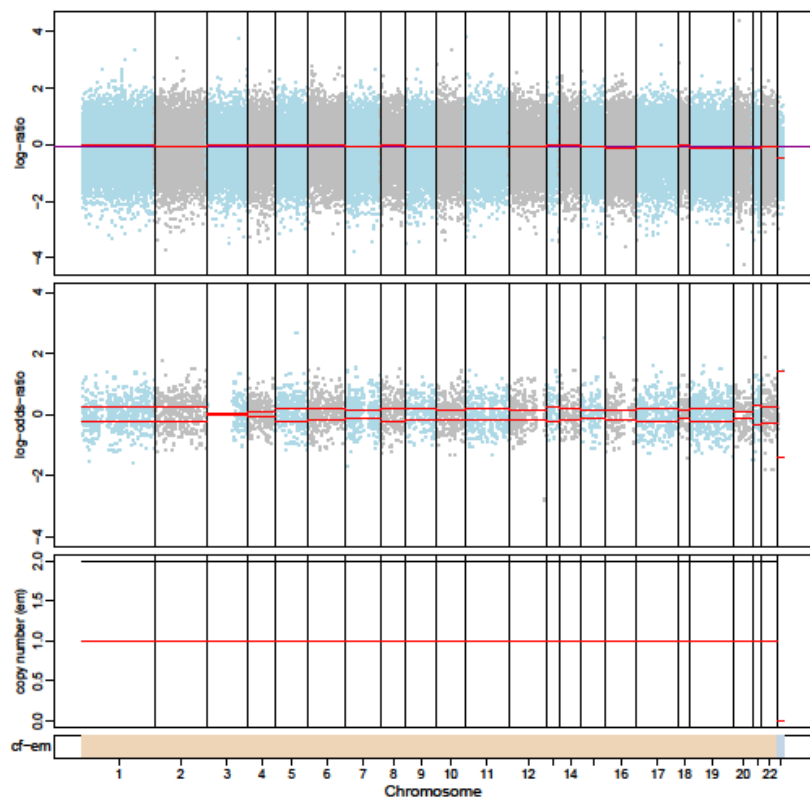

1165-P2

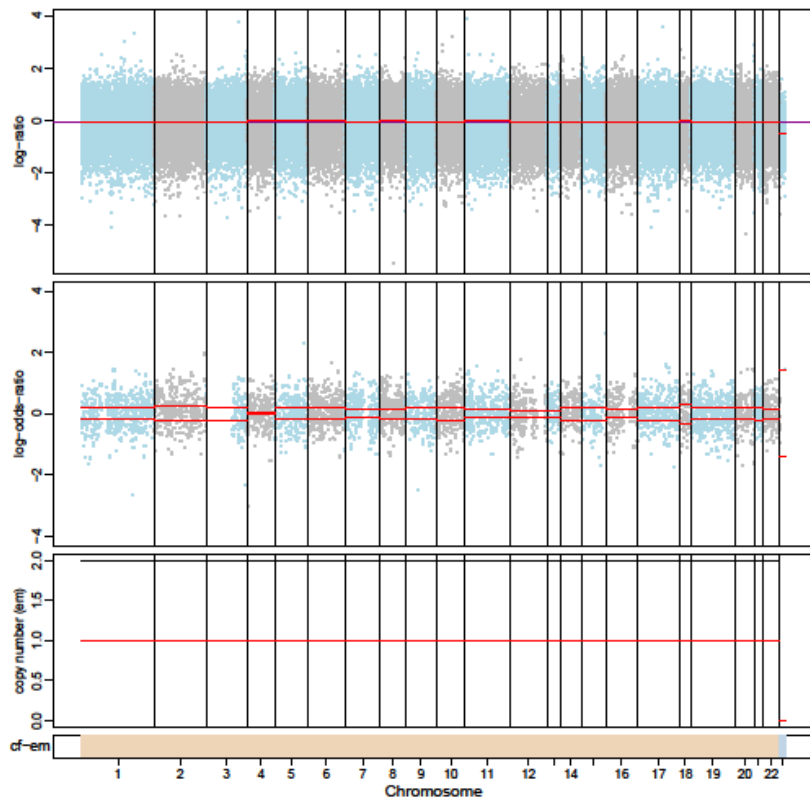

1167-P0

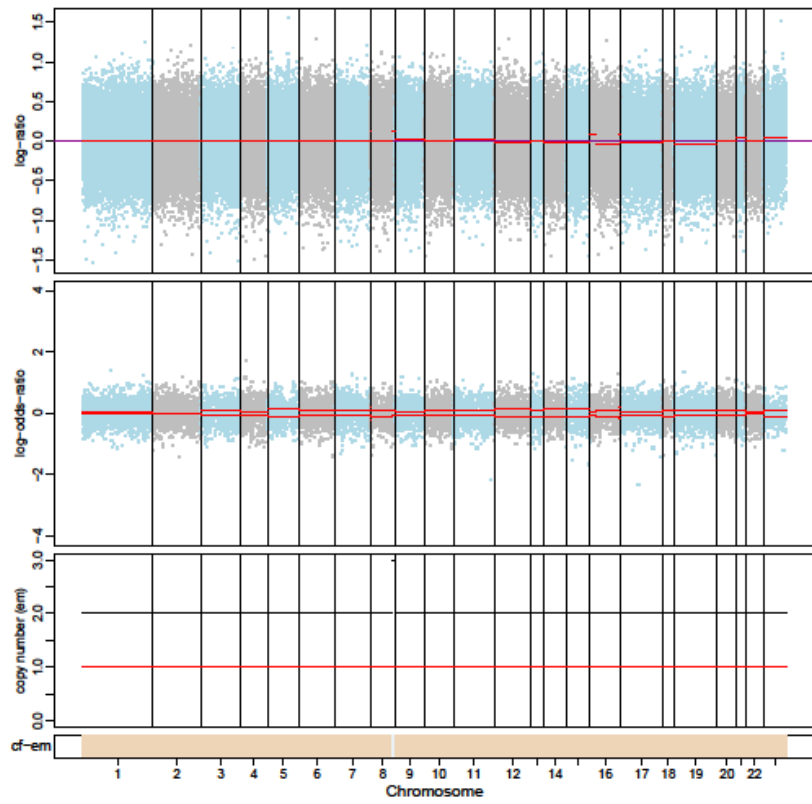

1167-P1

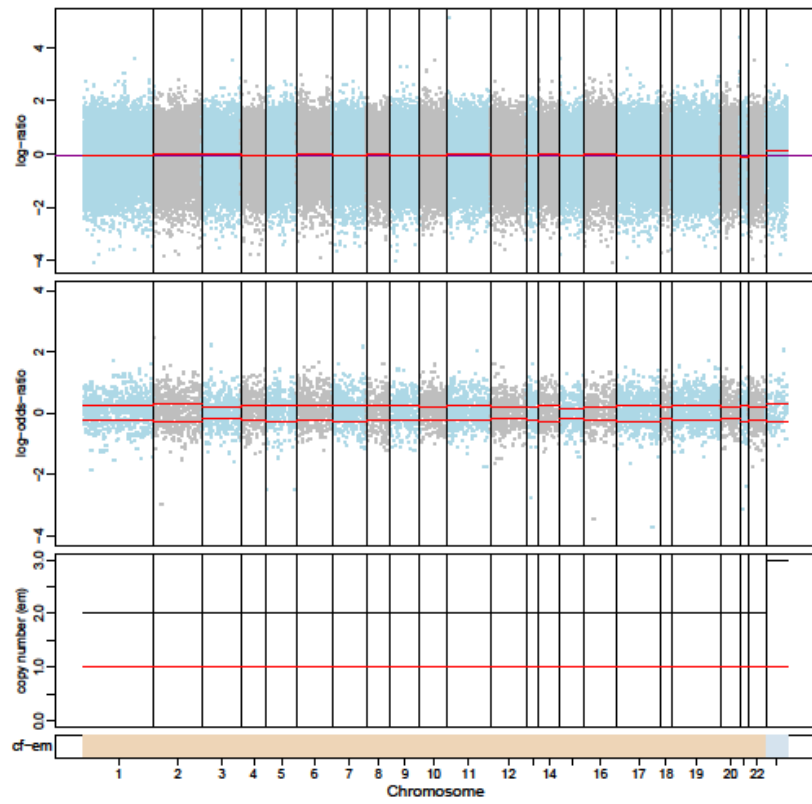

1167-P2

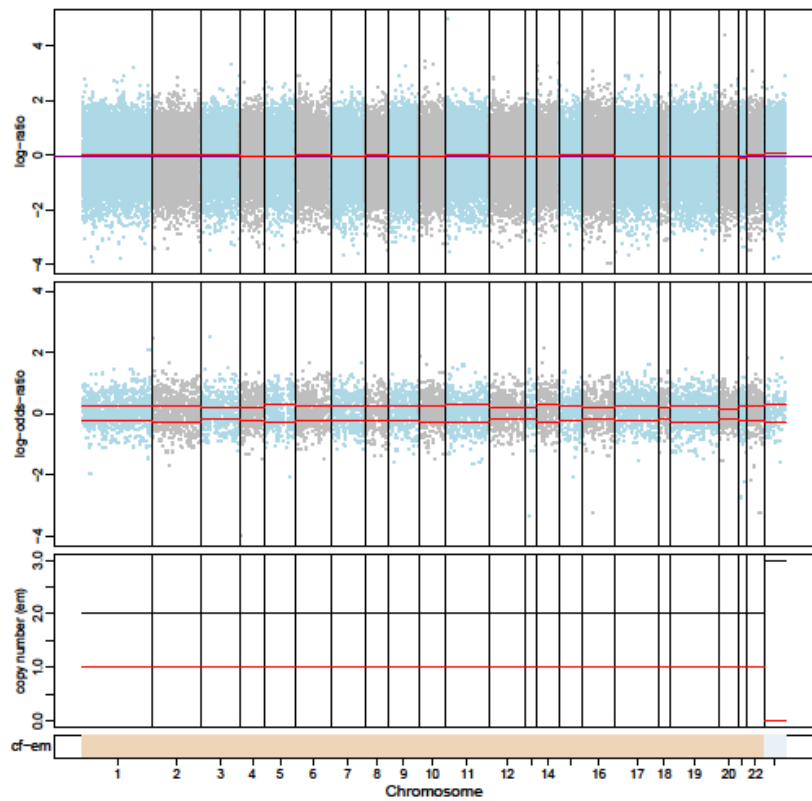

1168-P0

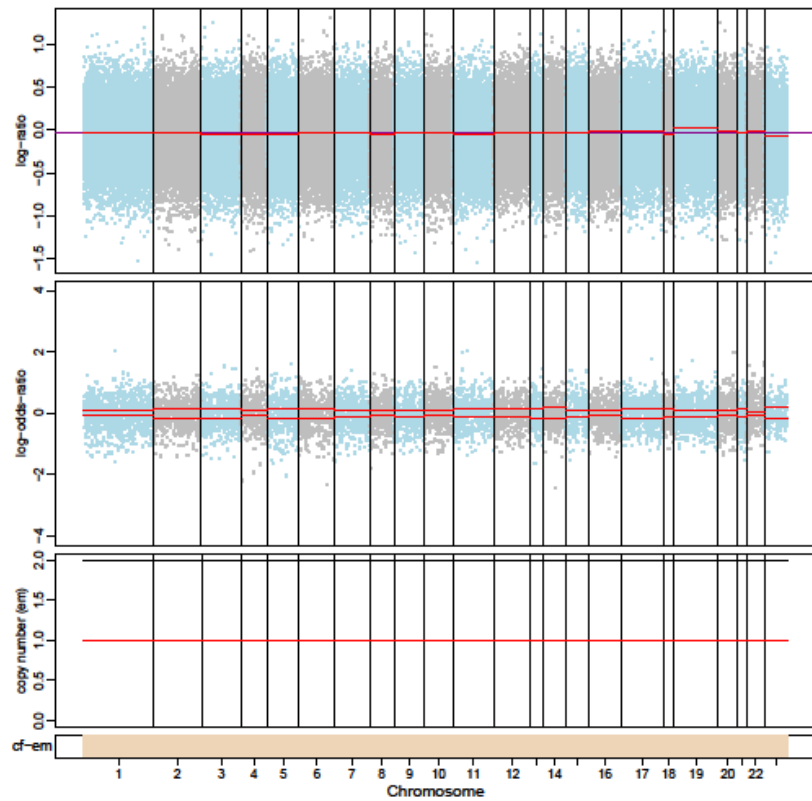

1168-P1

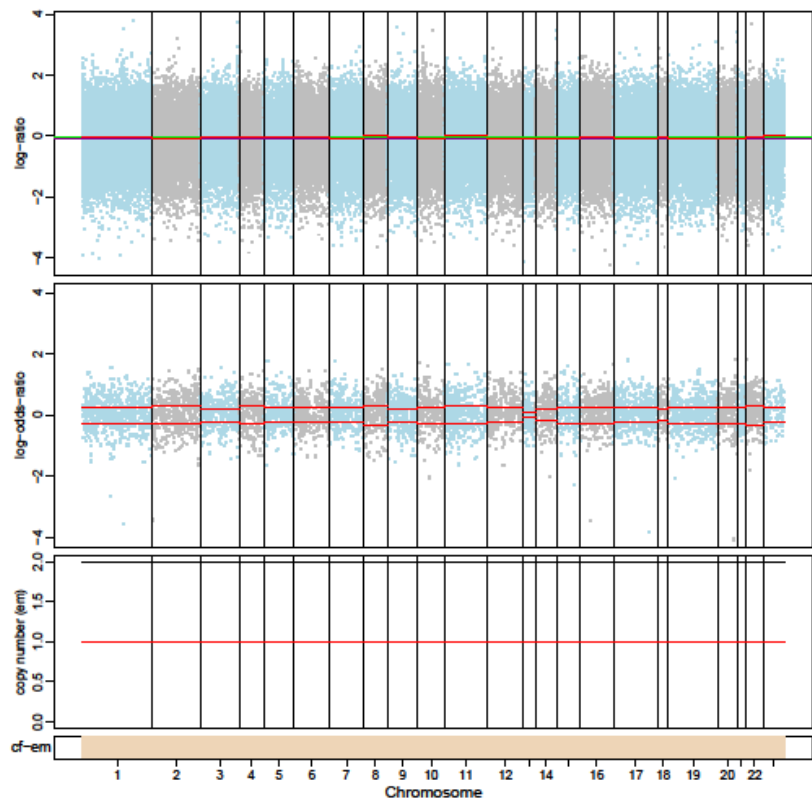

1170-P0

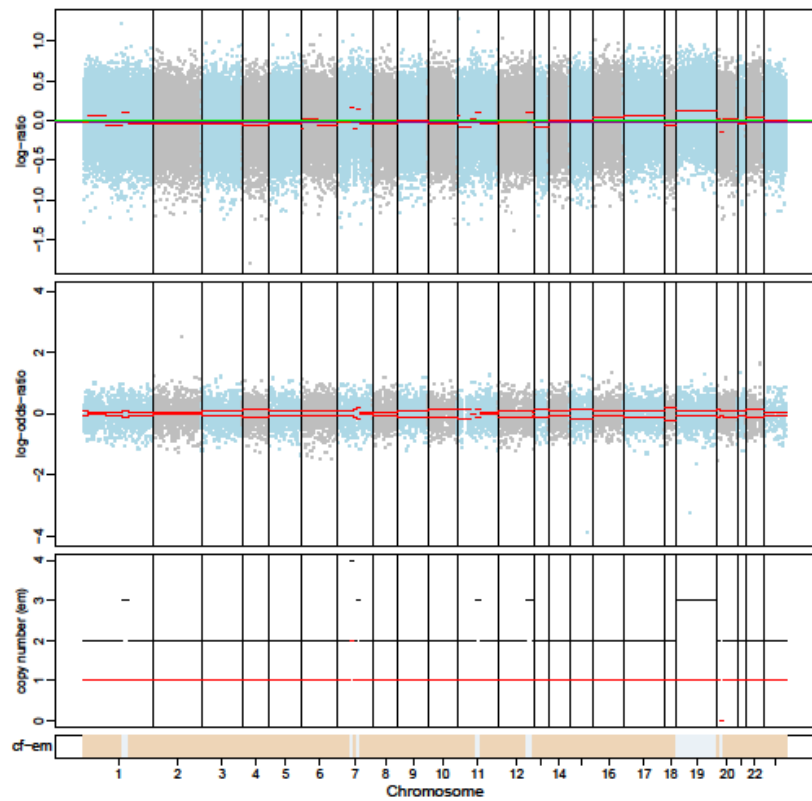

1170-P1

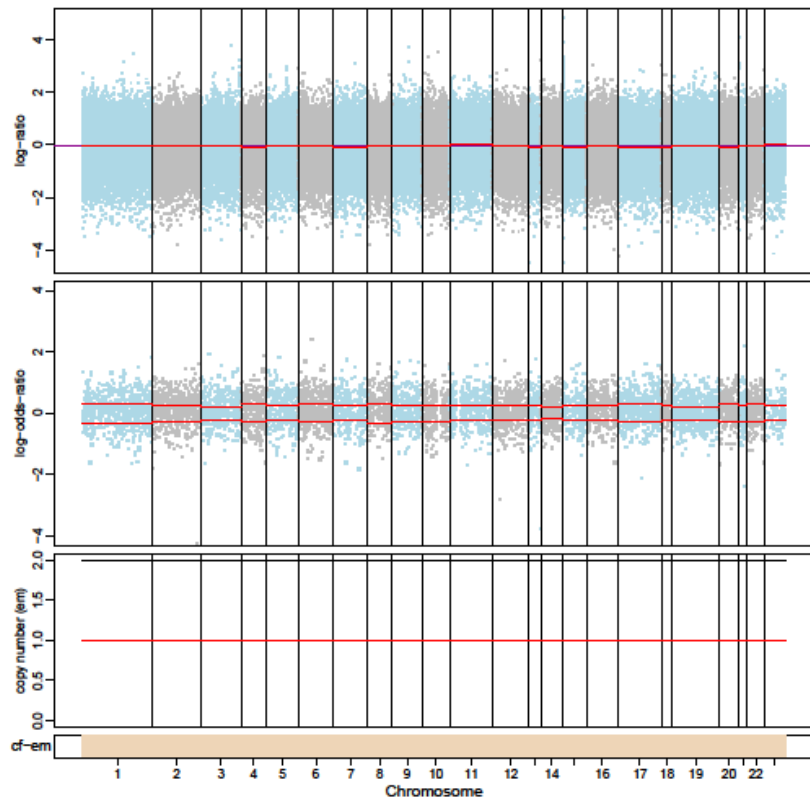

1170-P2

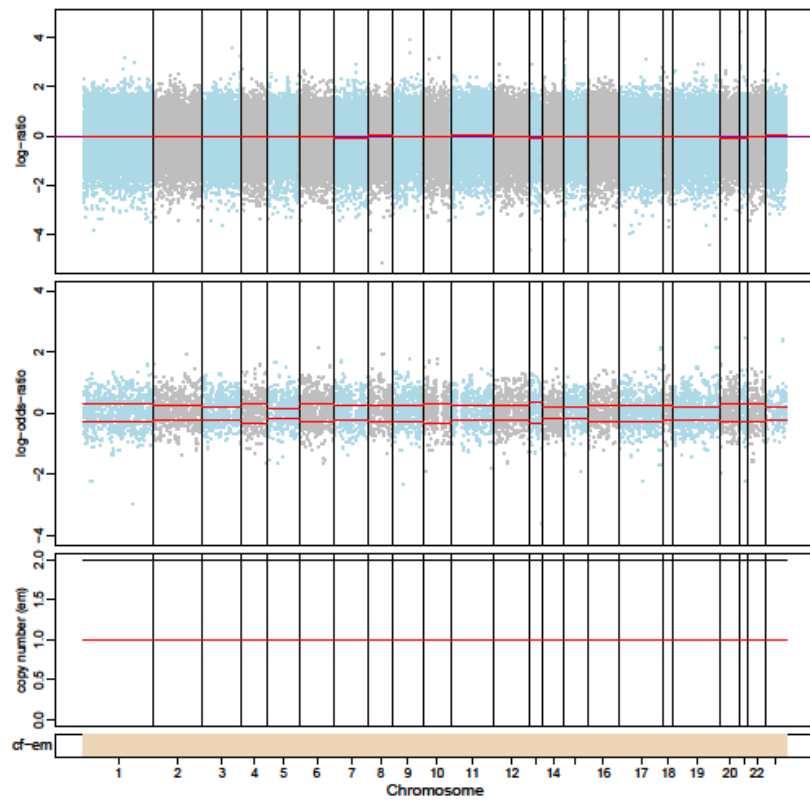

1171-P0

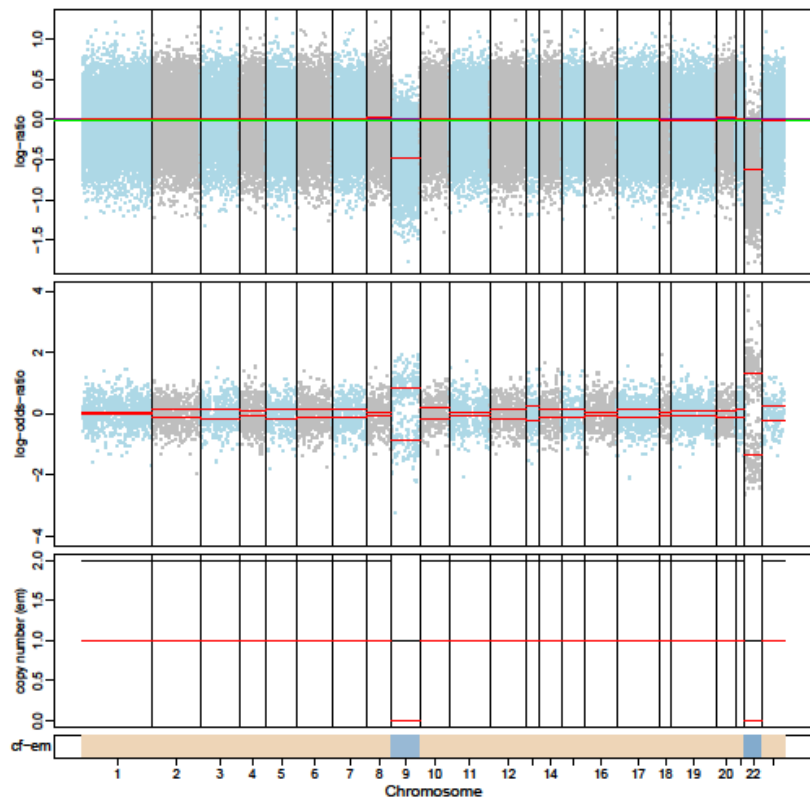

1171-P1

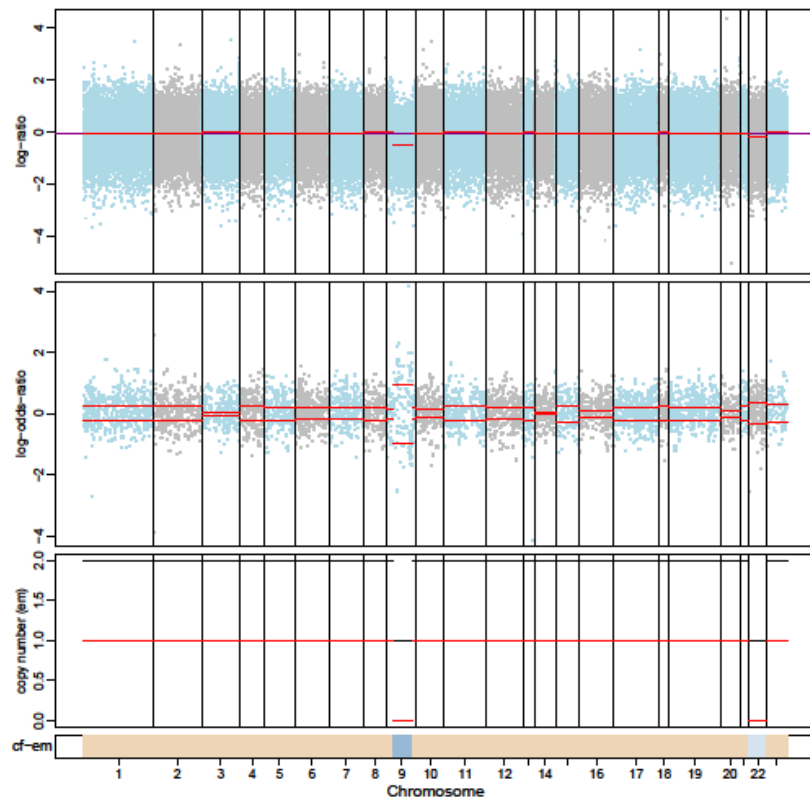

1171-P2

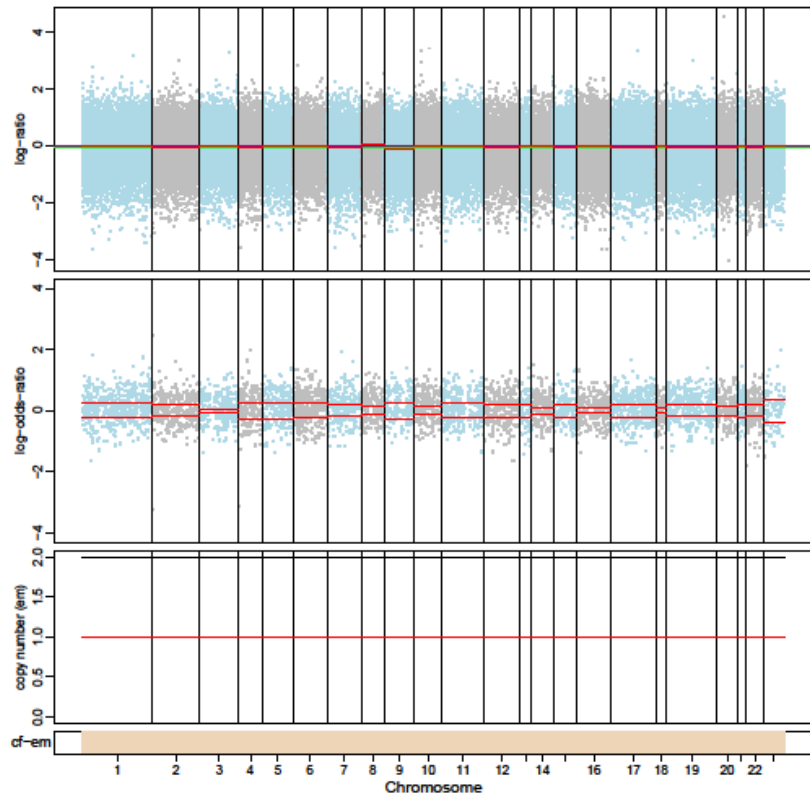

1174-P0

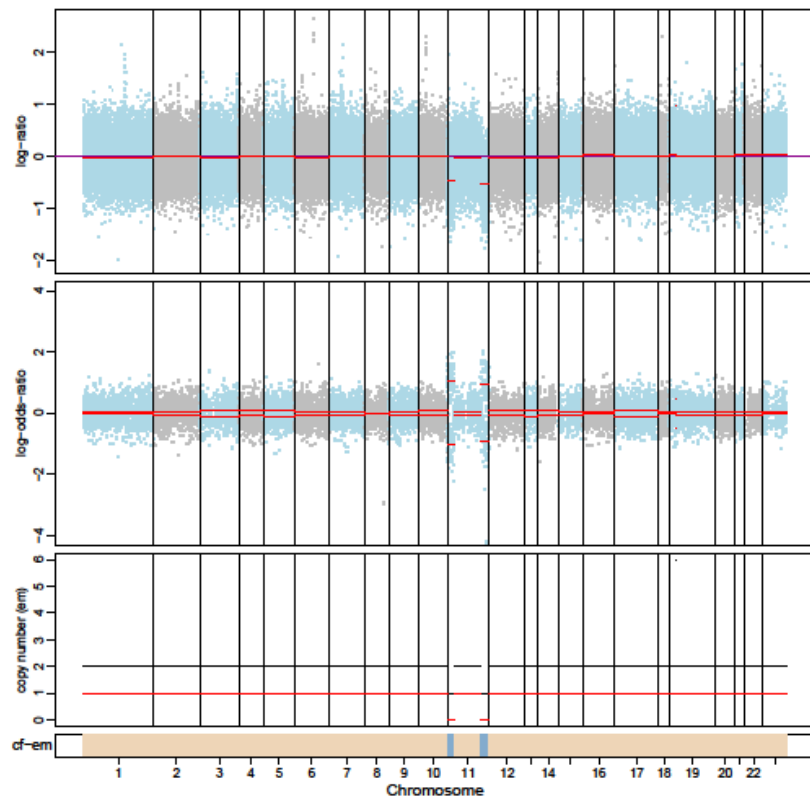



1174-P1

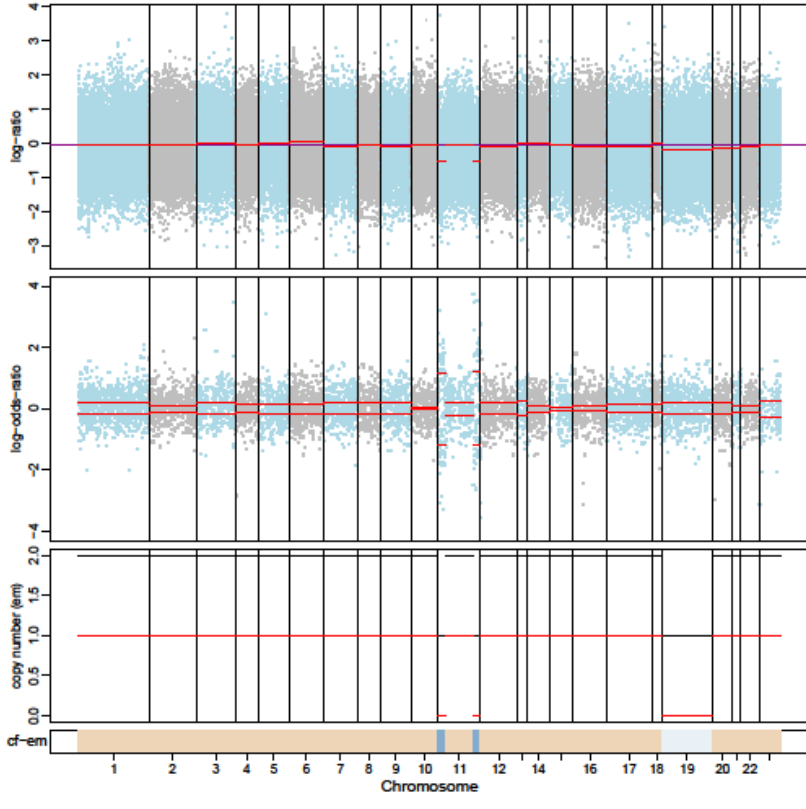

1174-P2

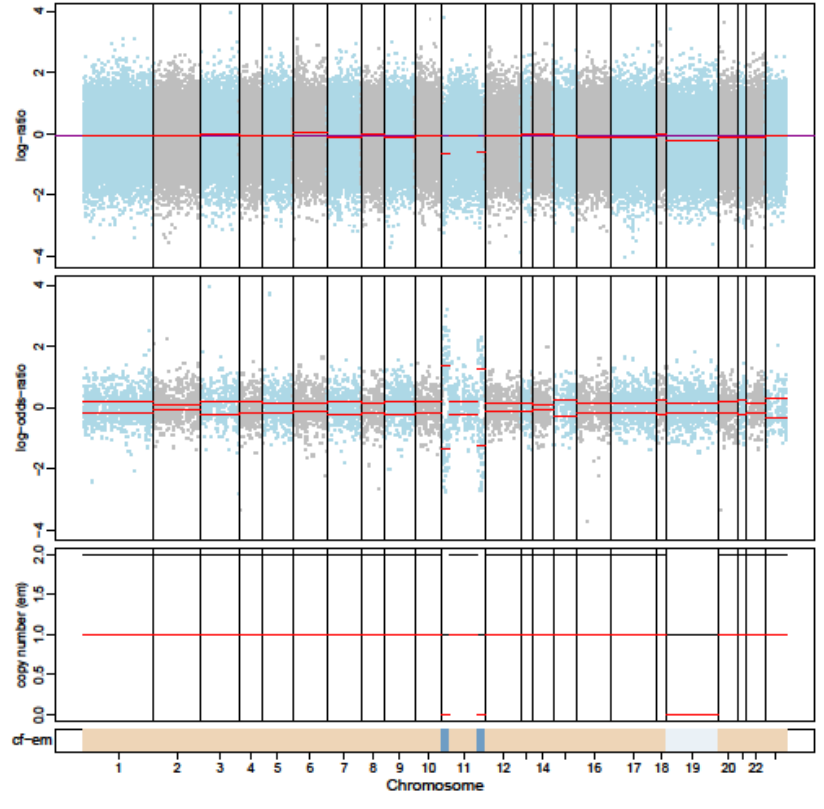

1176-P0

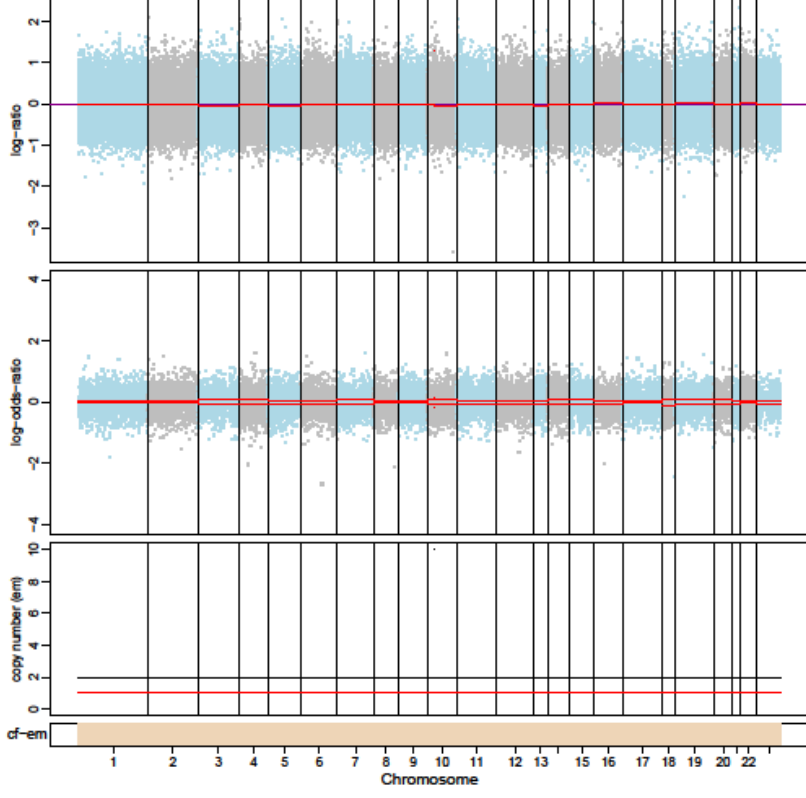

1176-P1

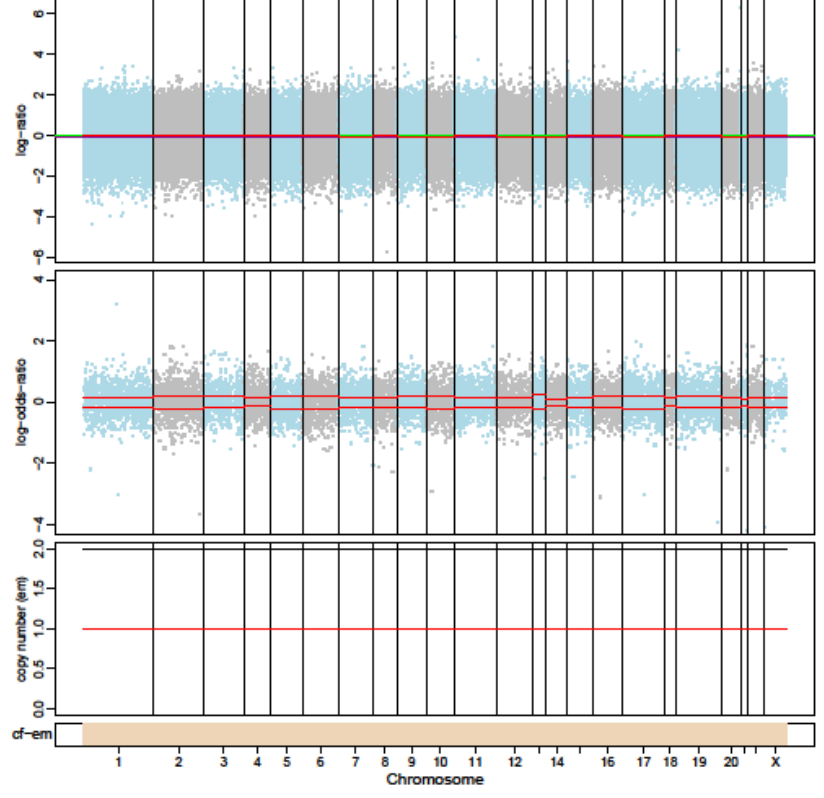

1176-P2

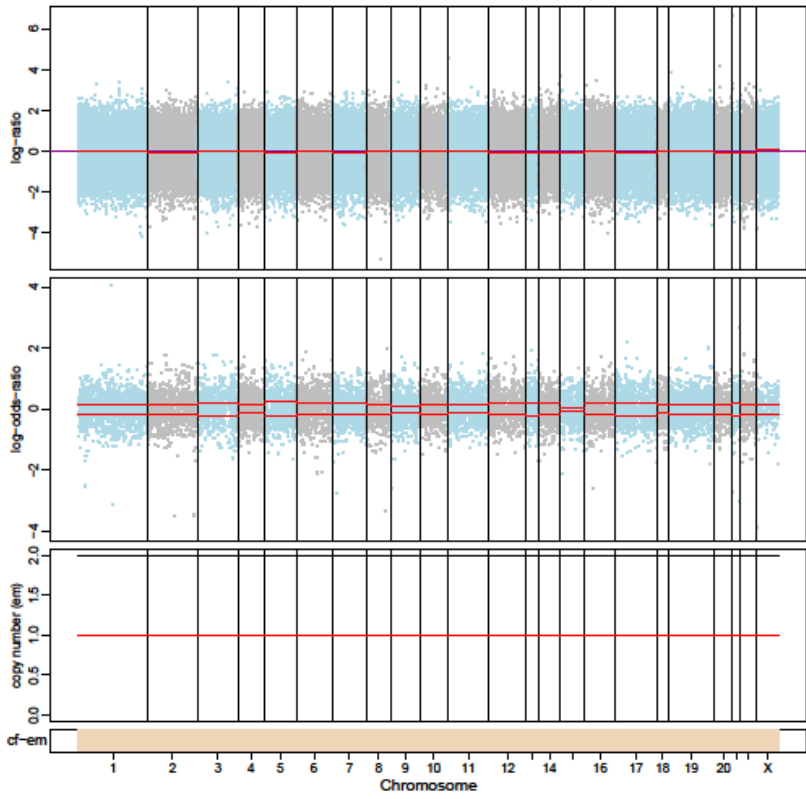

1180-P0

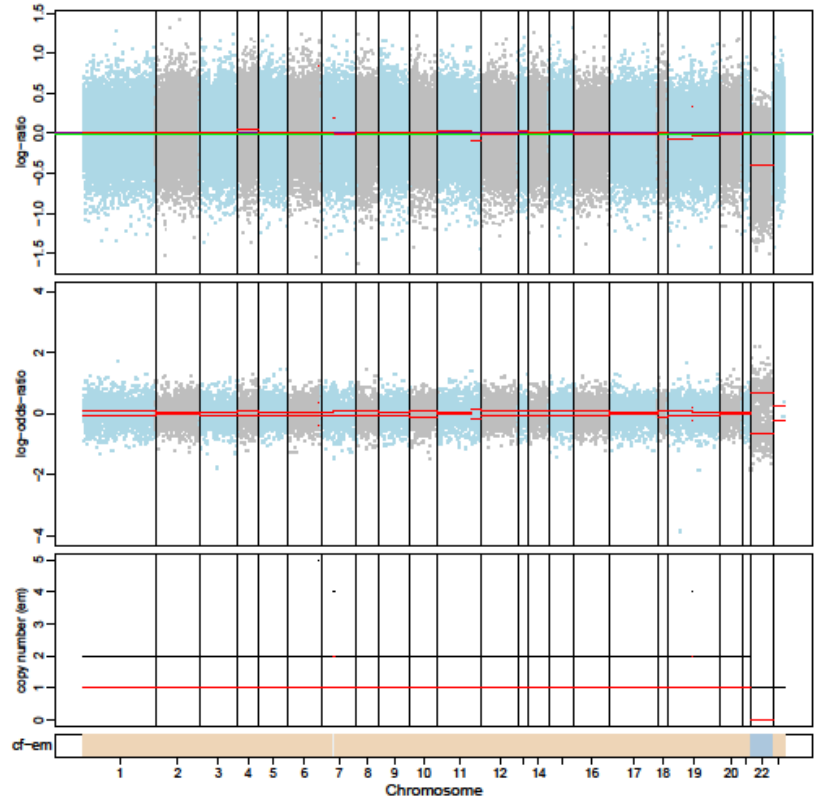

1180-P1

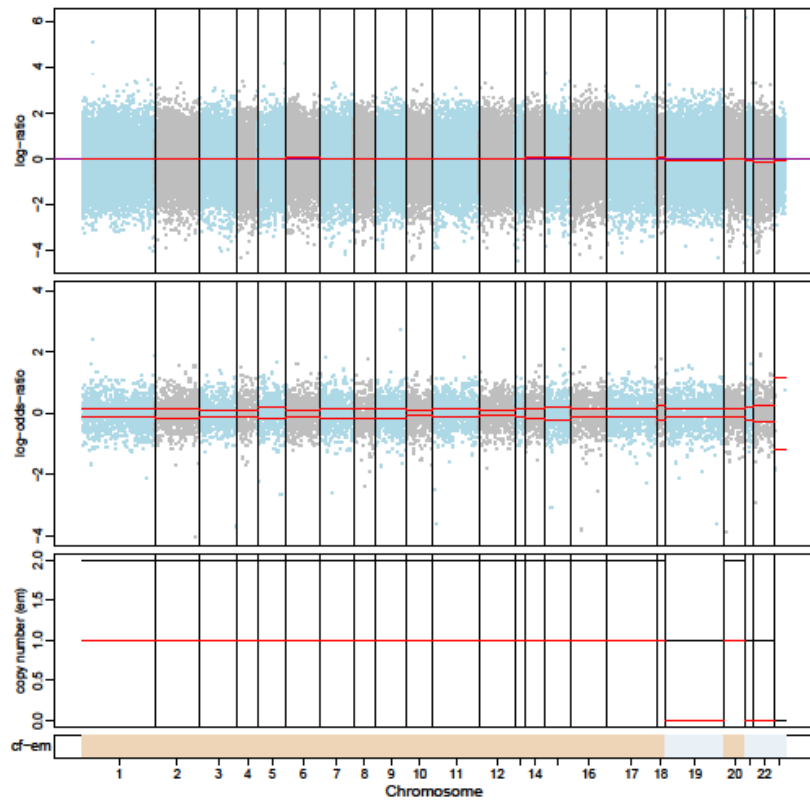

1180-P2

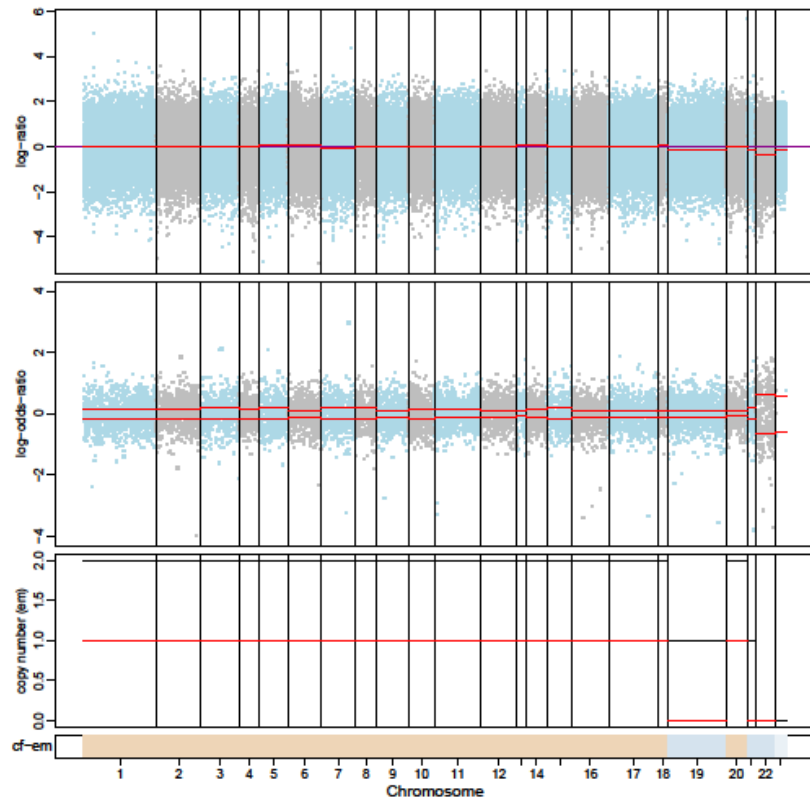

986-P0

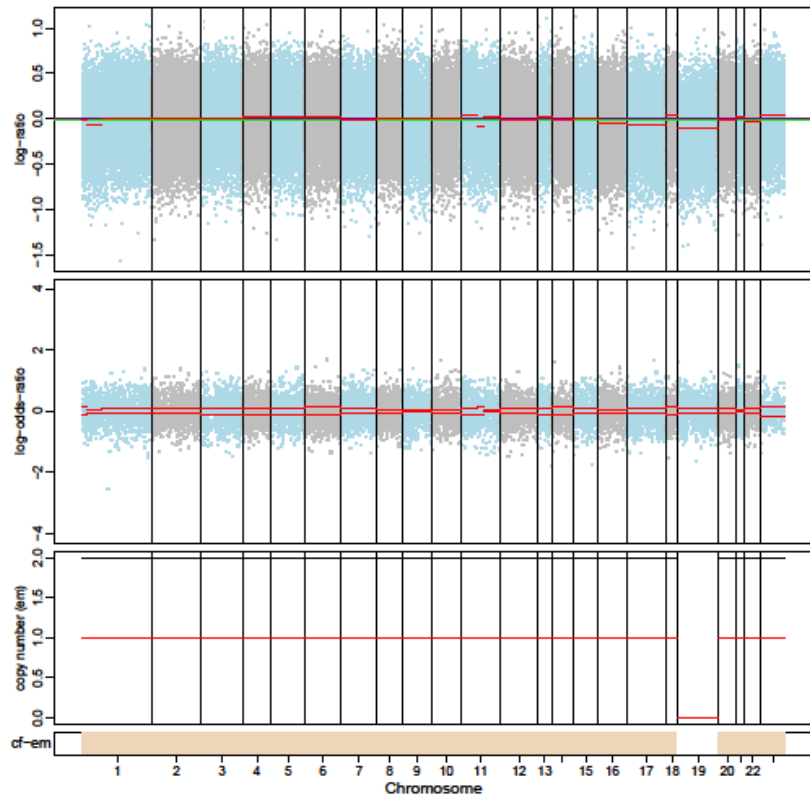

986-P1

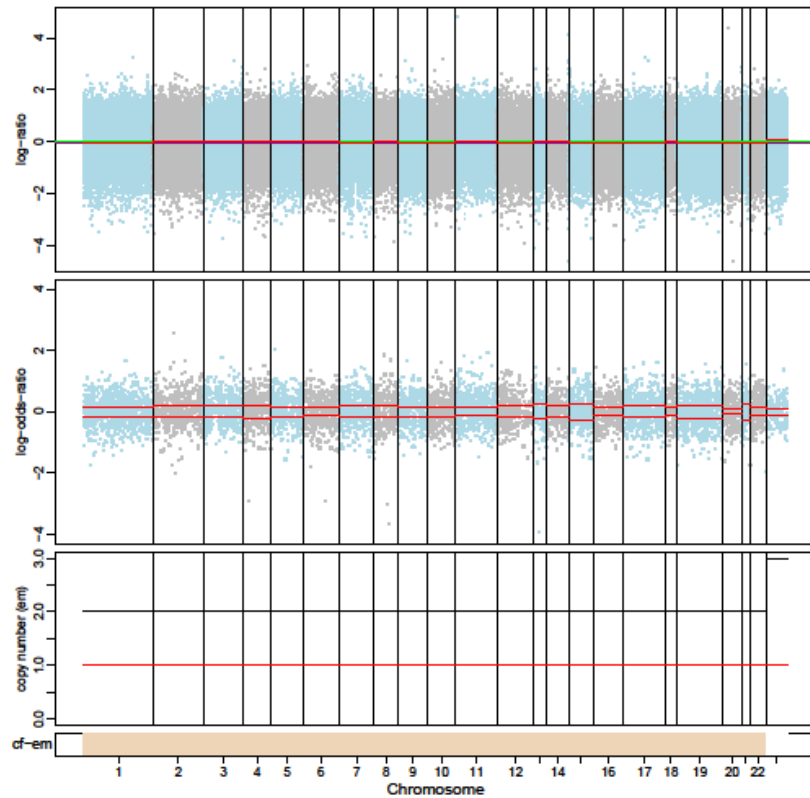

1181-P0

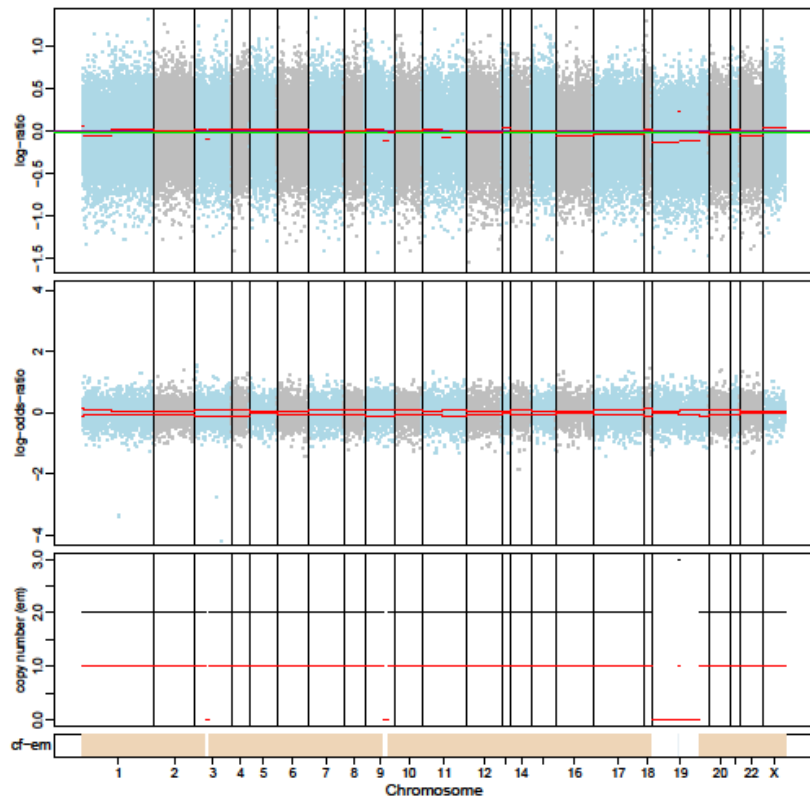

1181-P1

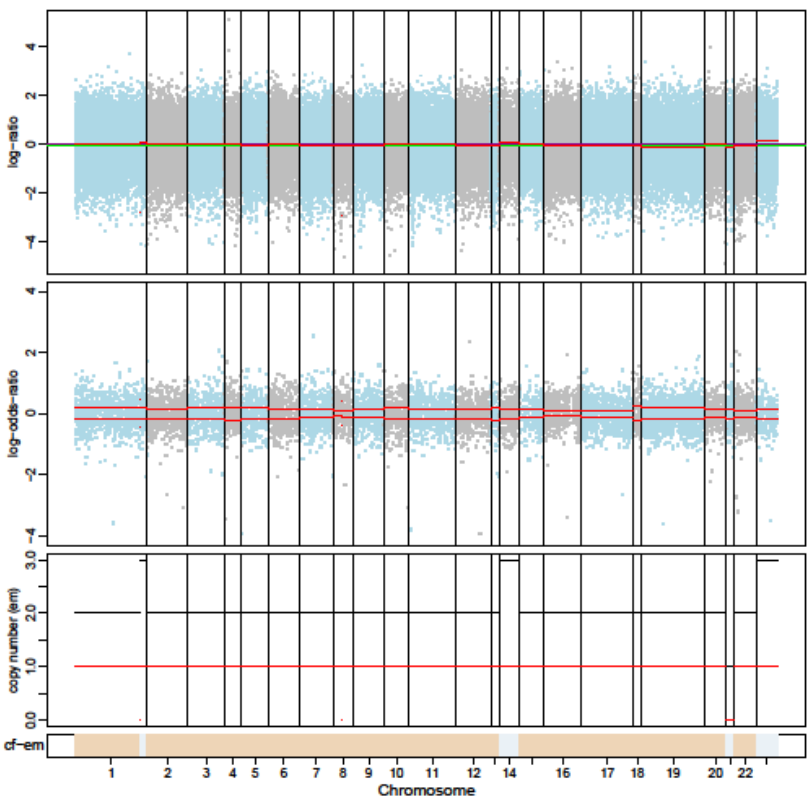

1183-P0

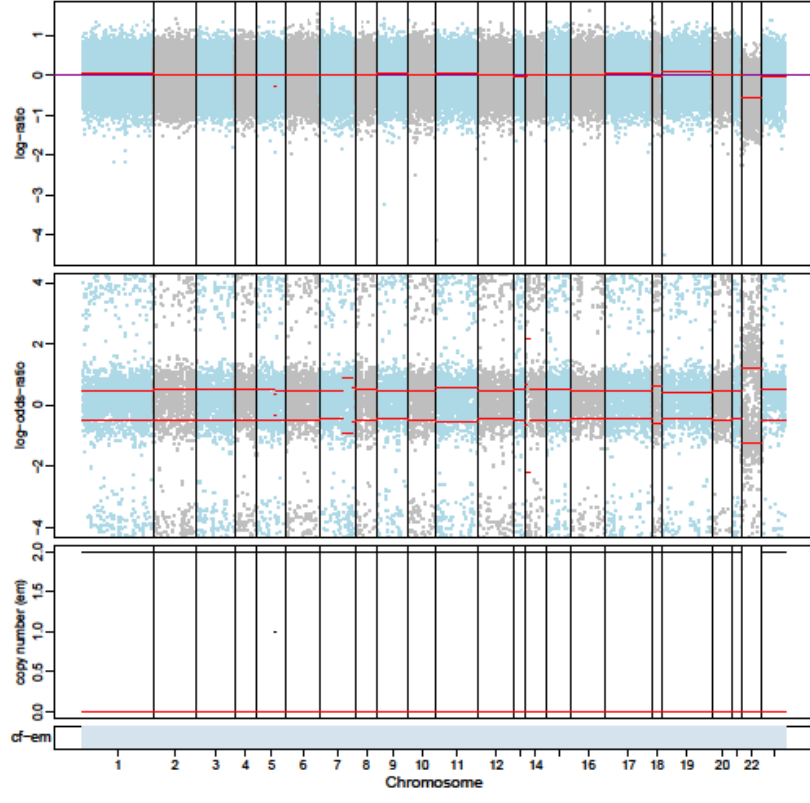

1183-P1

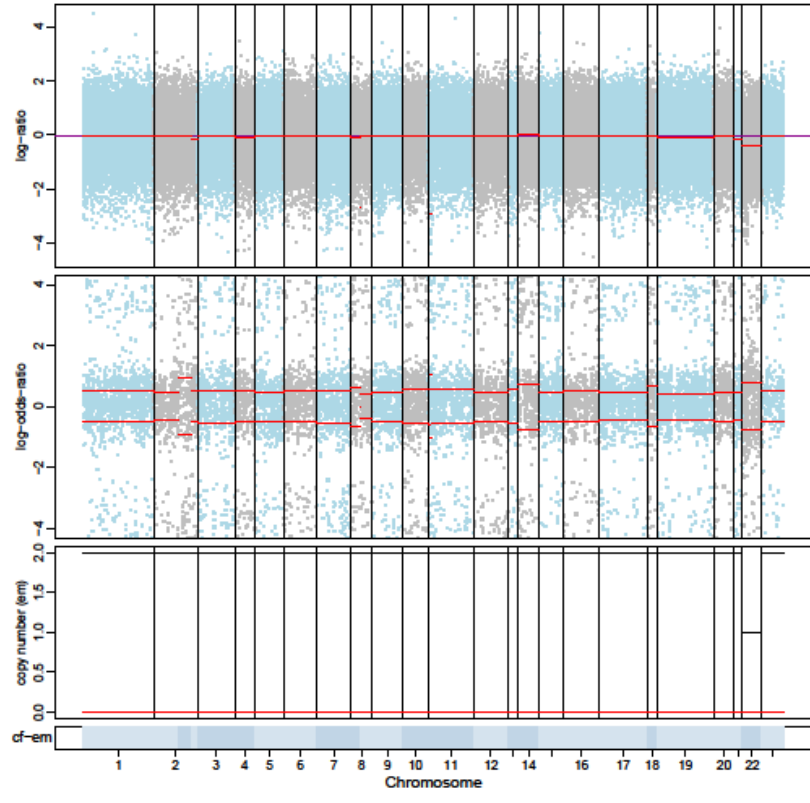

1183-P2

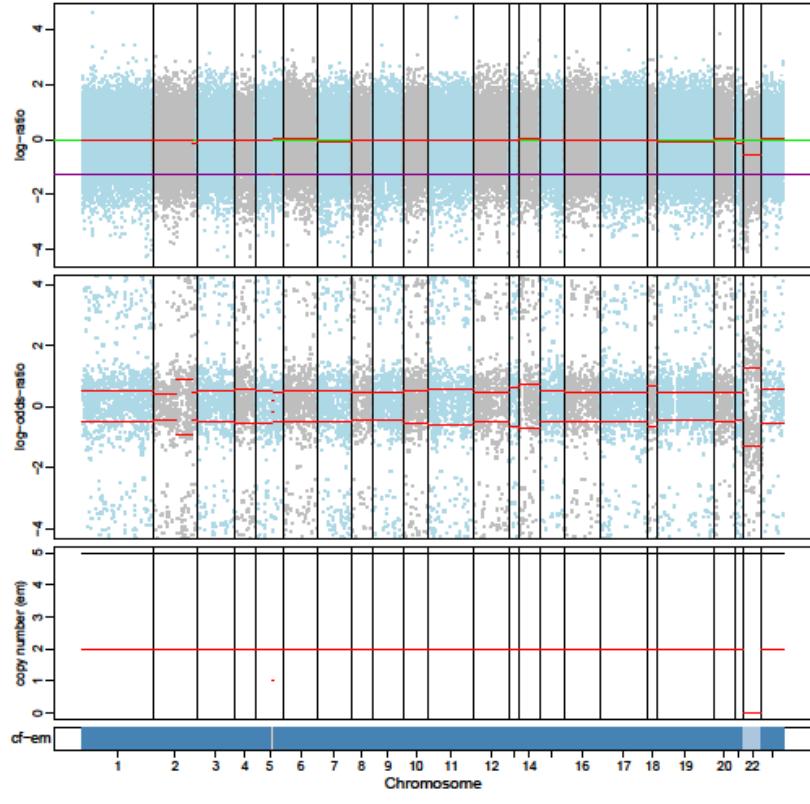

1184-P0

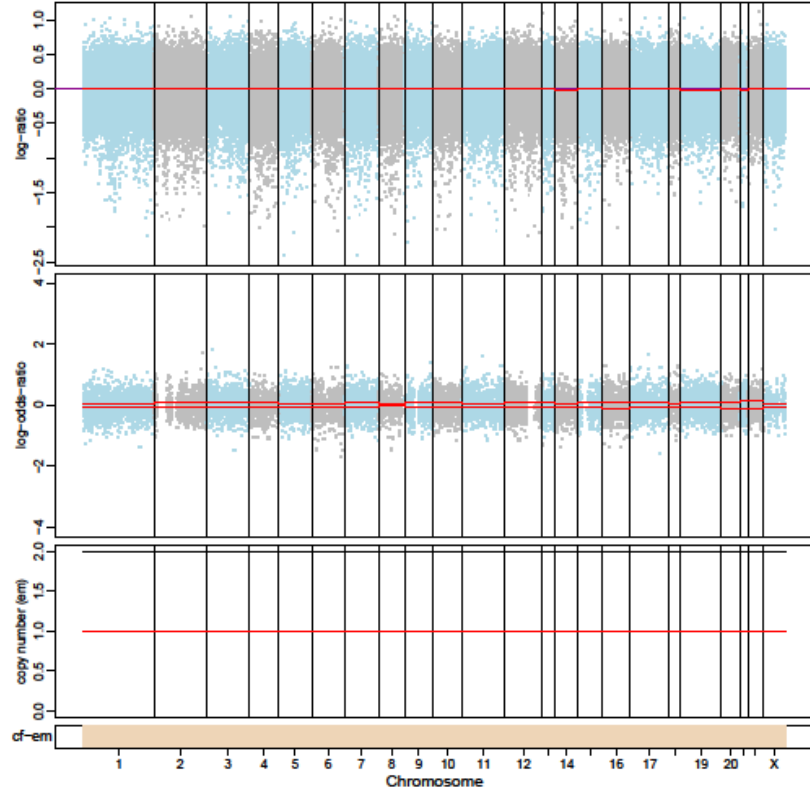

1184-P1

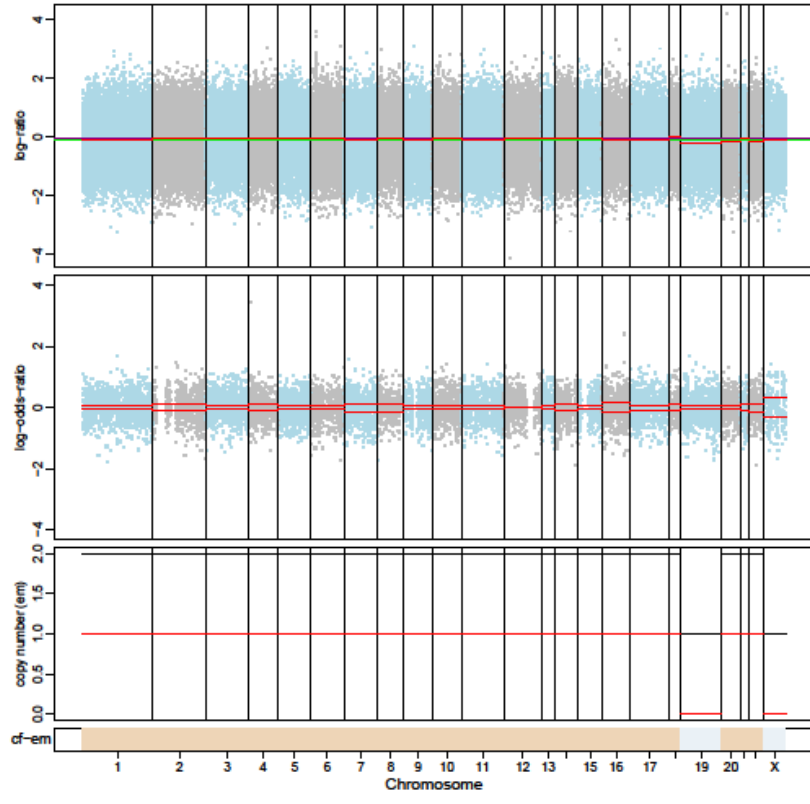

1184-P2

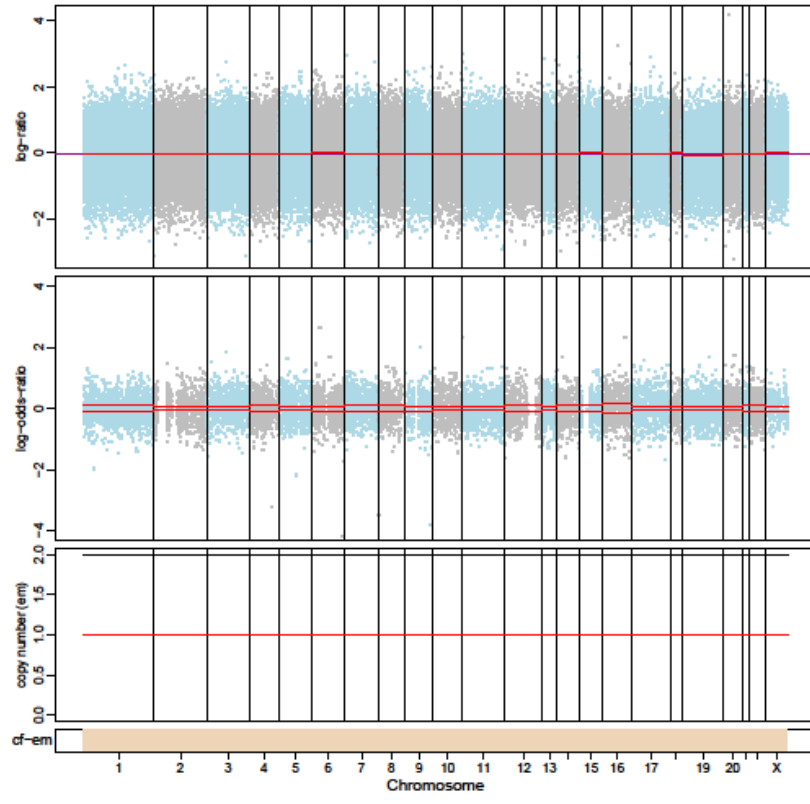

1188-P0

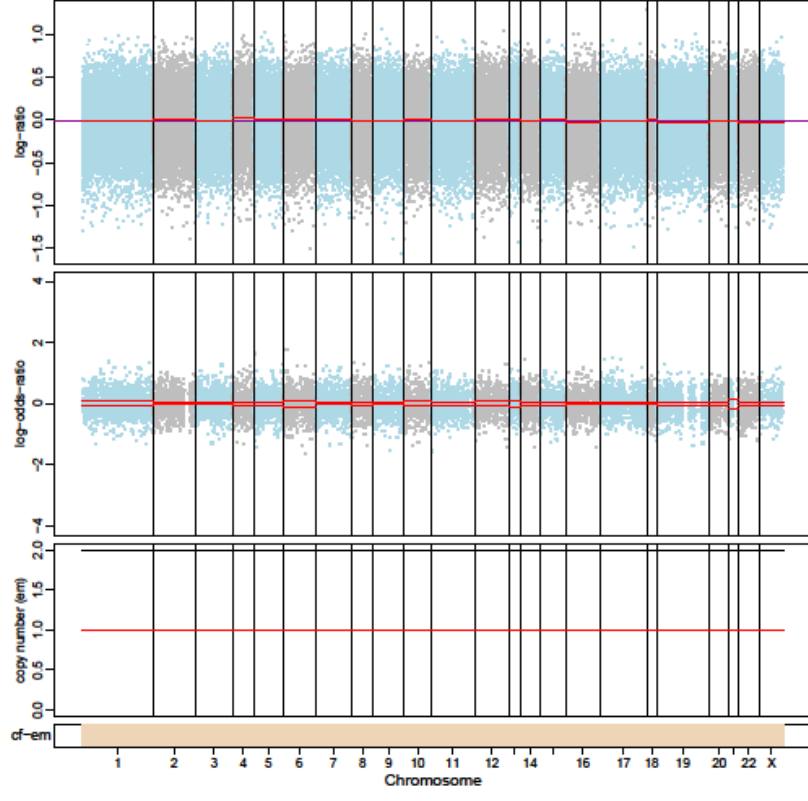

1188-P1

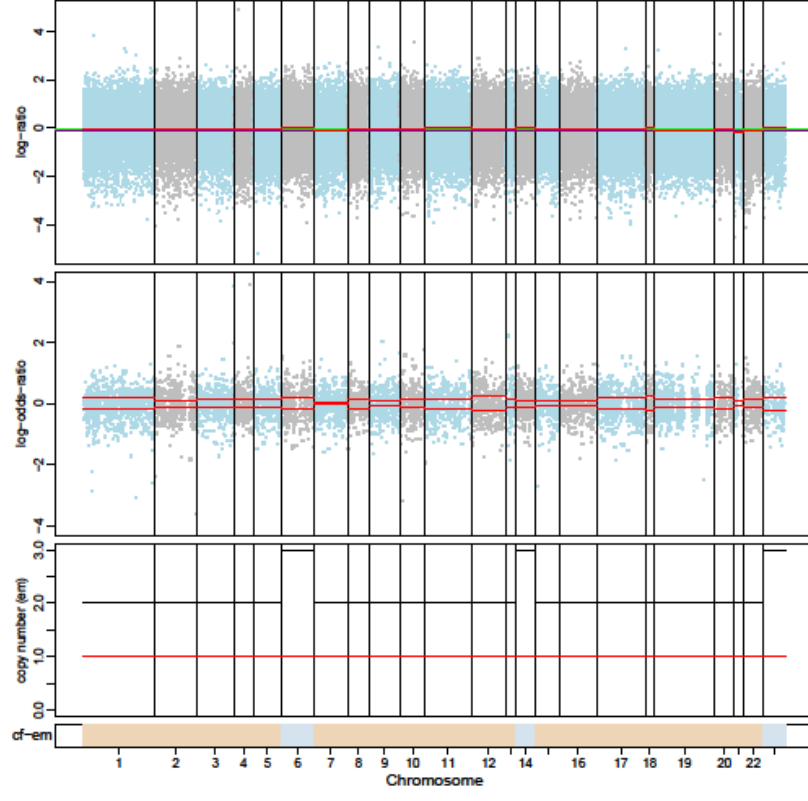

1188-P2

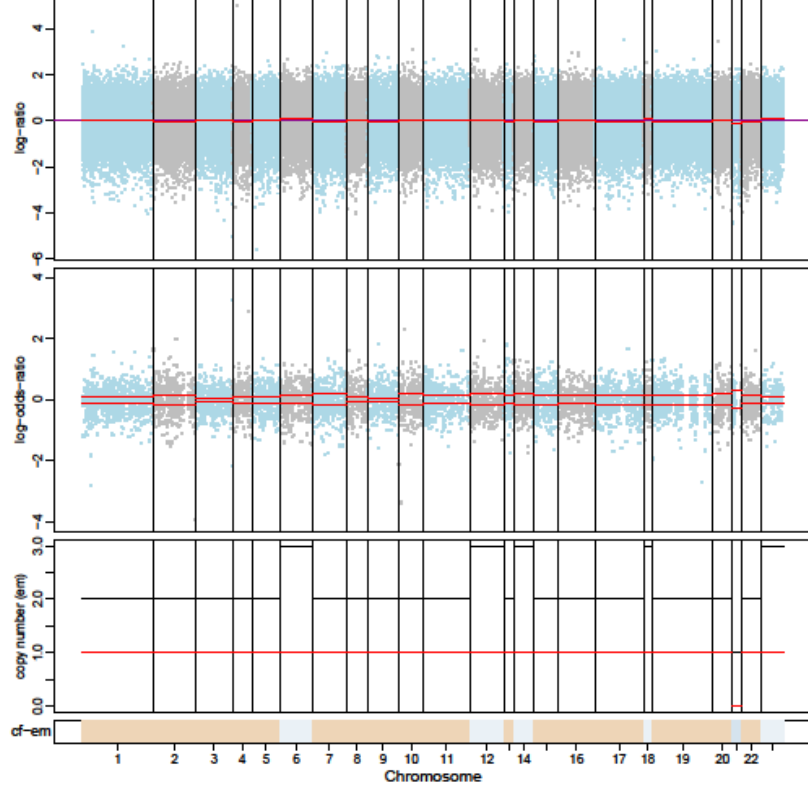

1189-P0

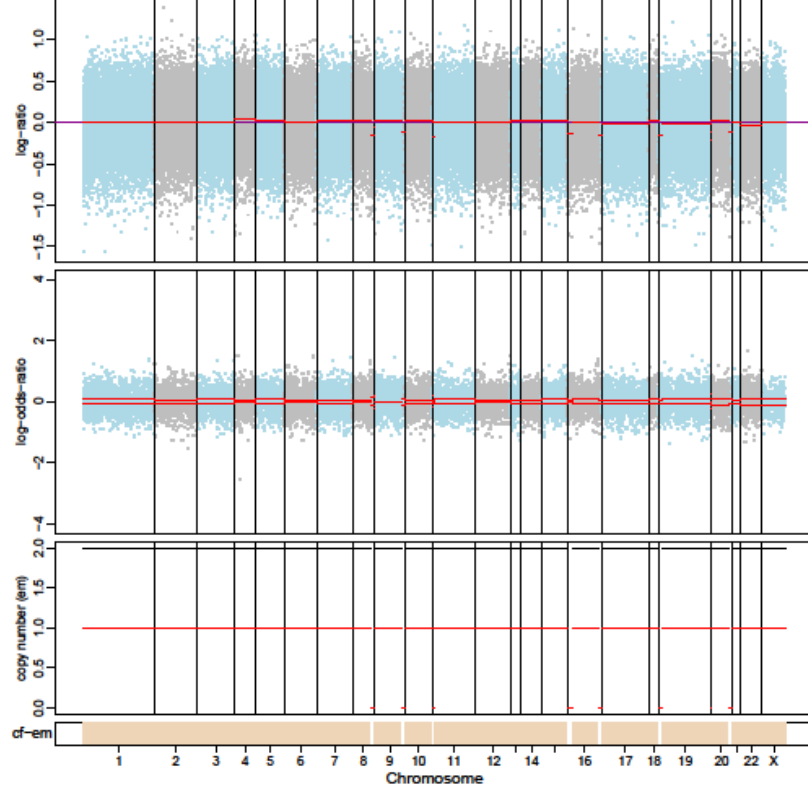

1189-P1

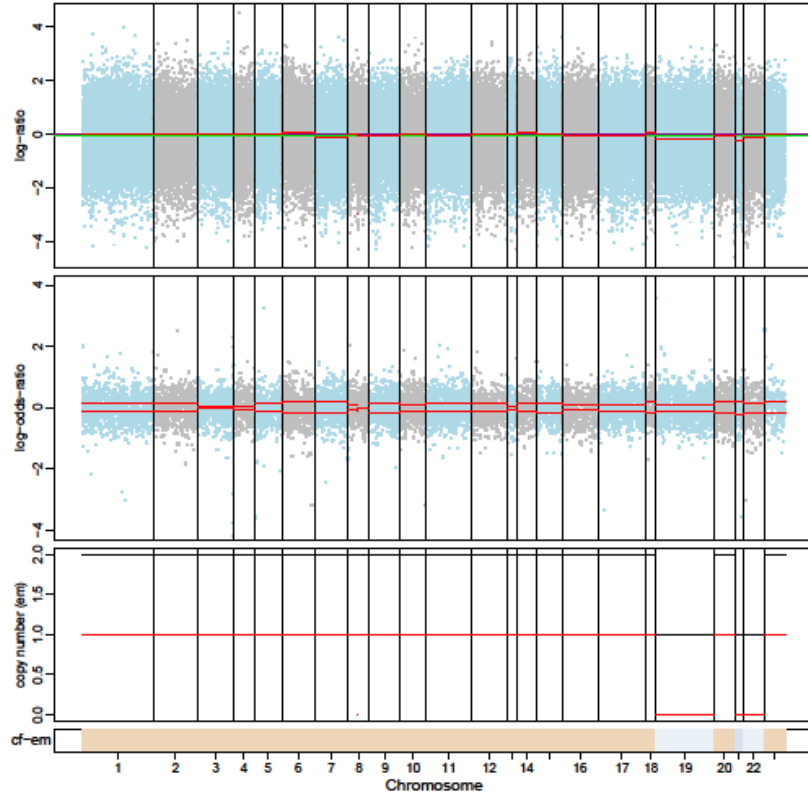

1189-P2

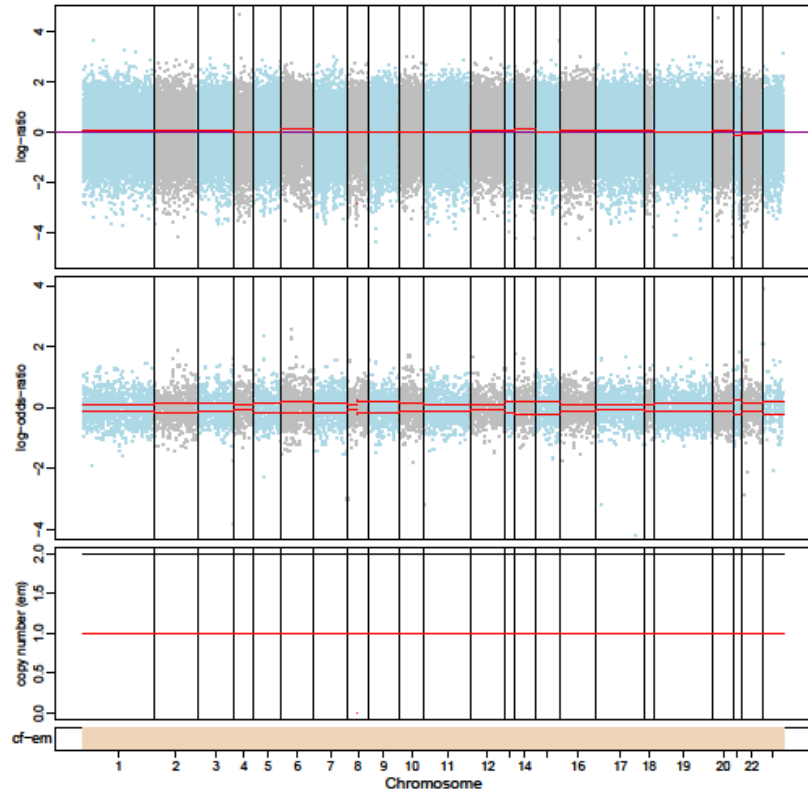

1191-P0

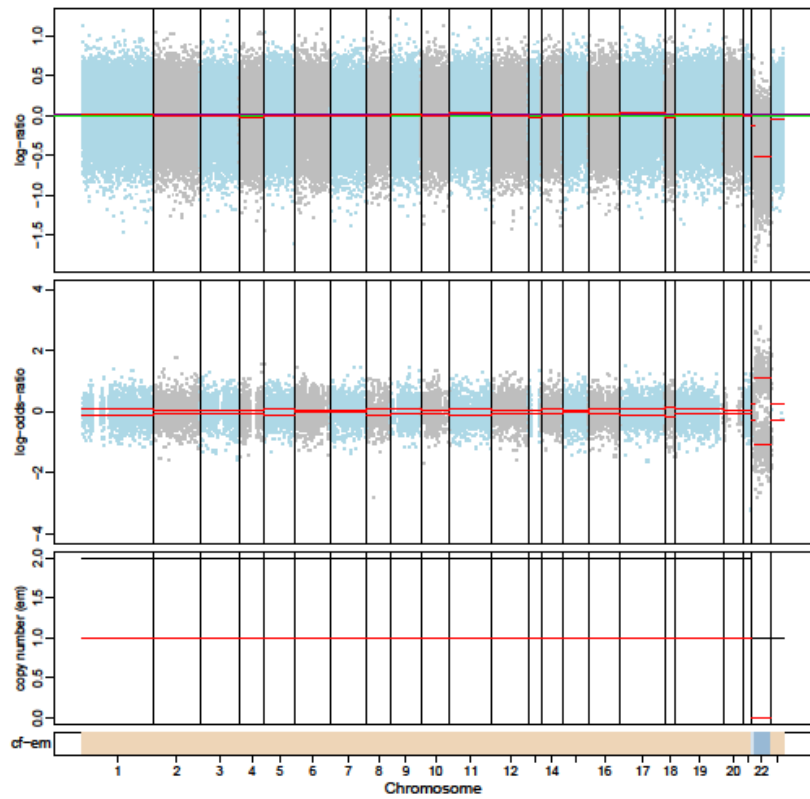

1191-P1

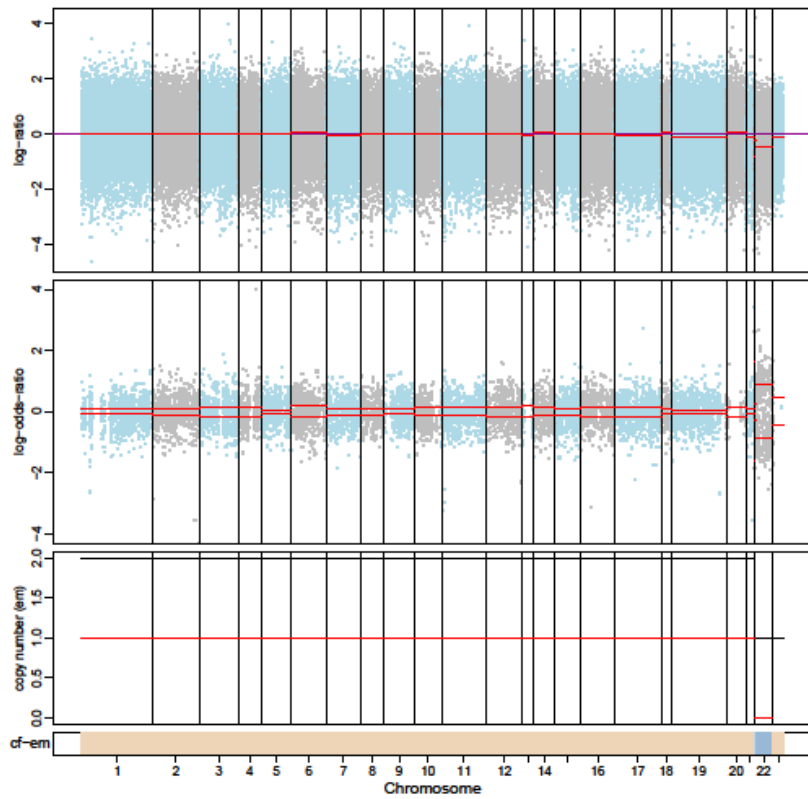

1191-P2

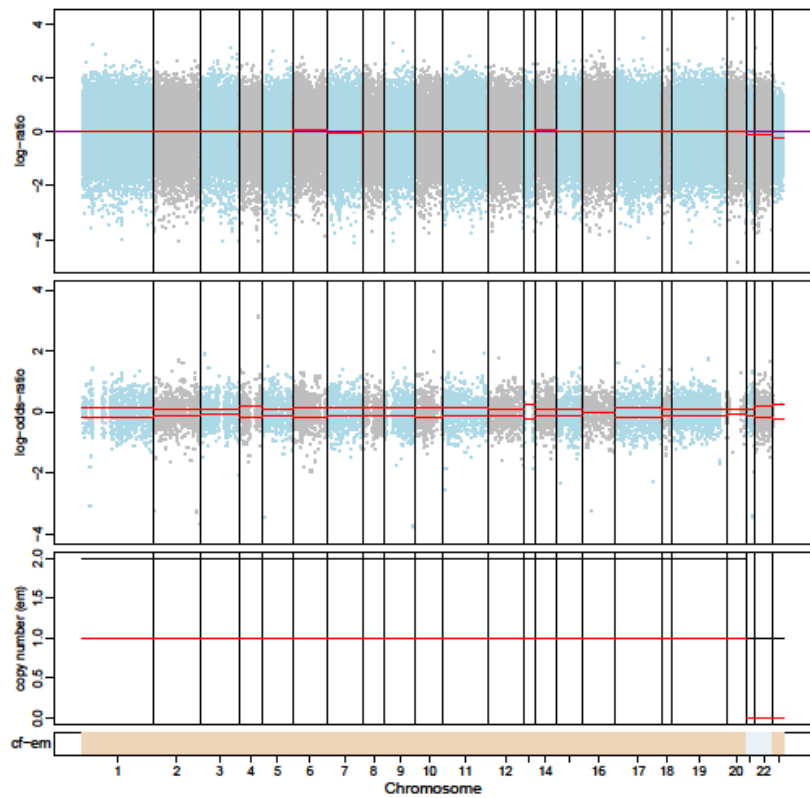

1195-P0

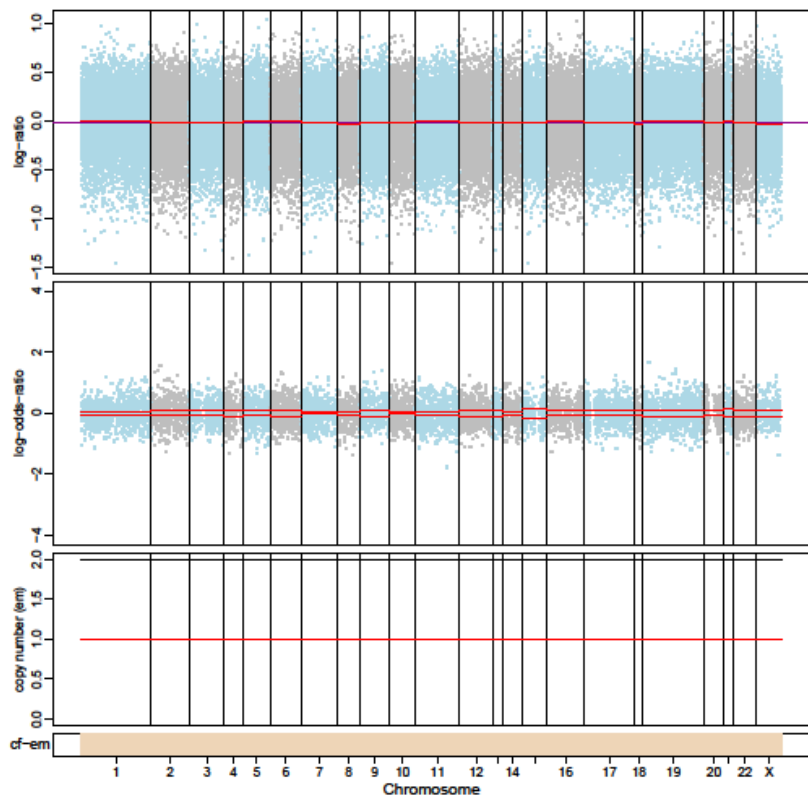

1195-P1

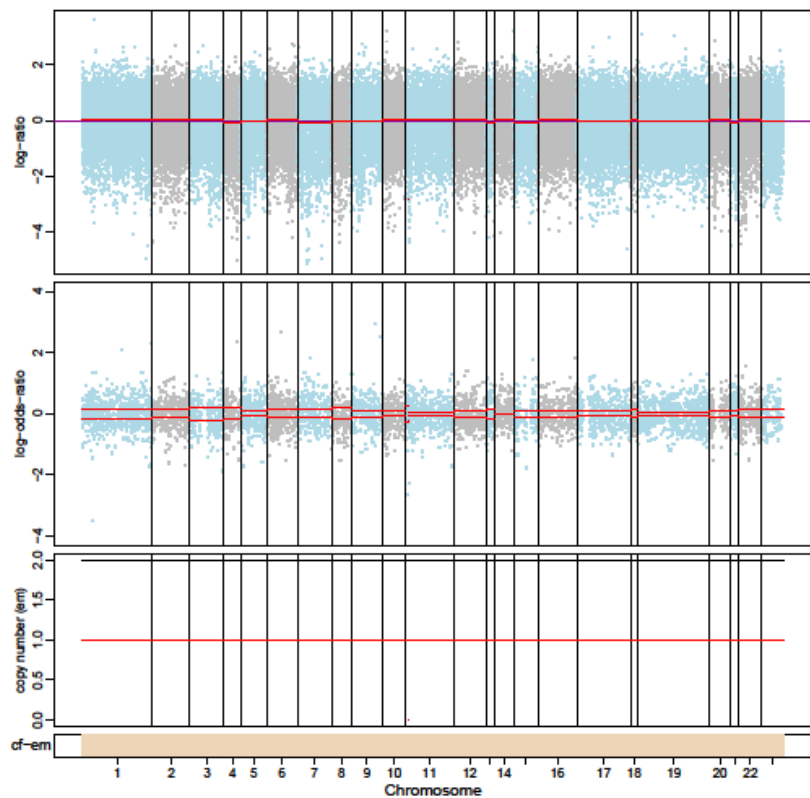

1195-P2

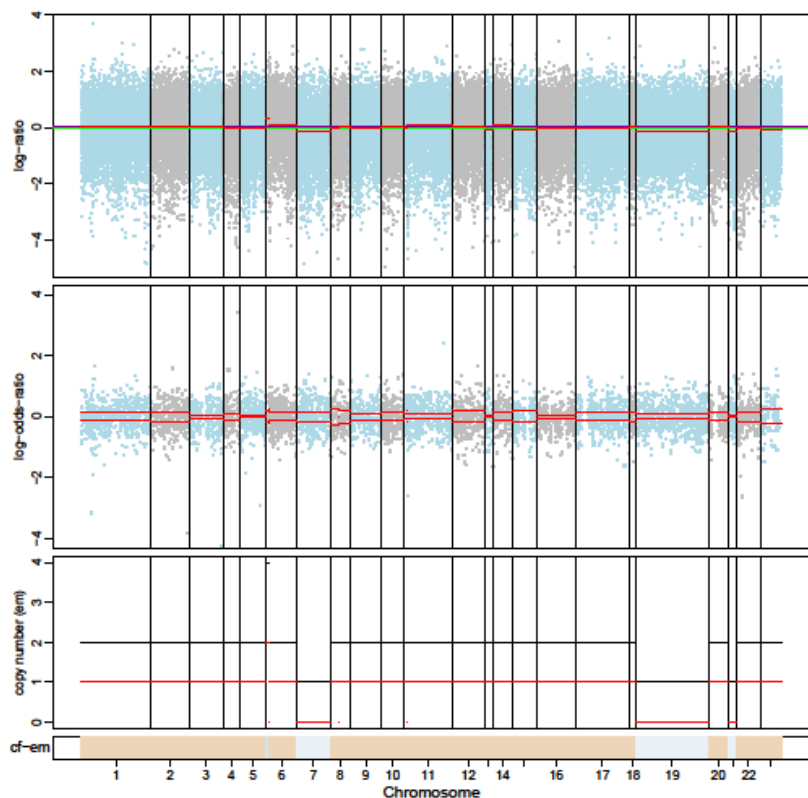

1196-P0

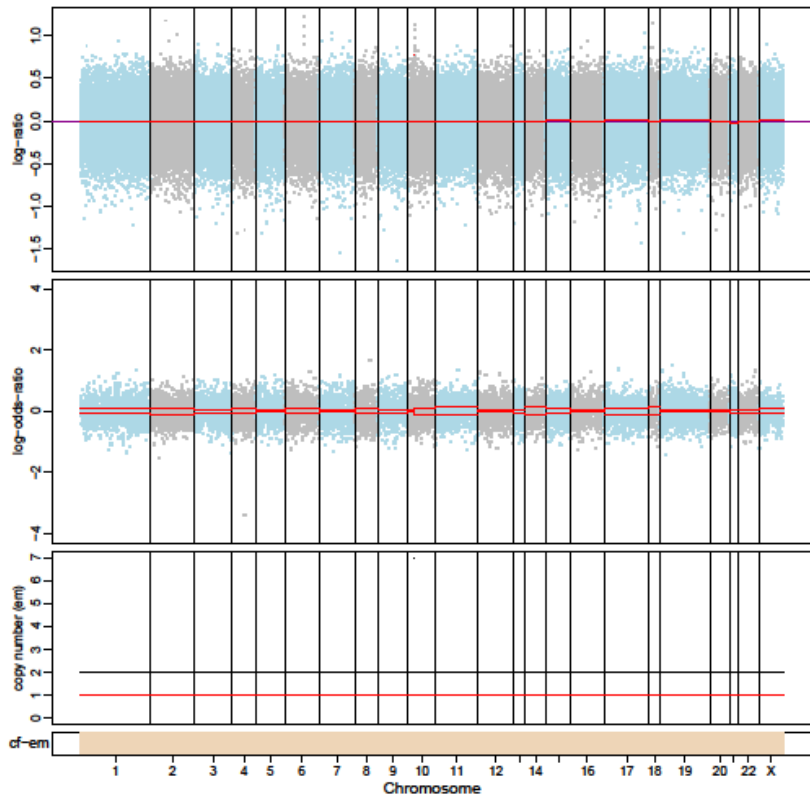

1196-P2

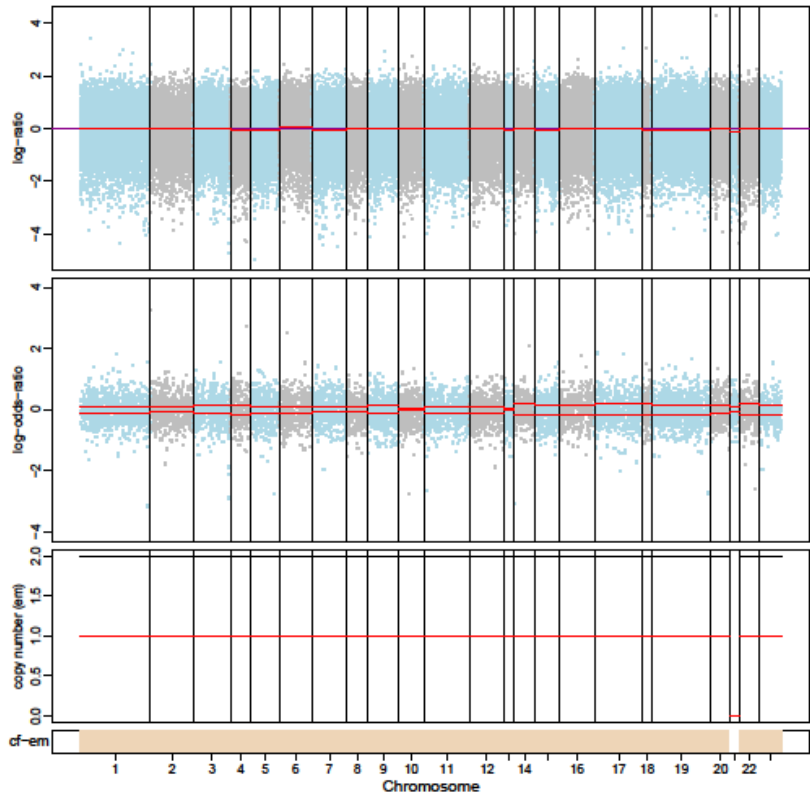

1198-P1

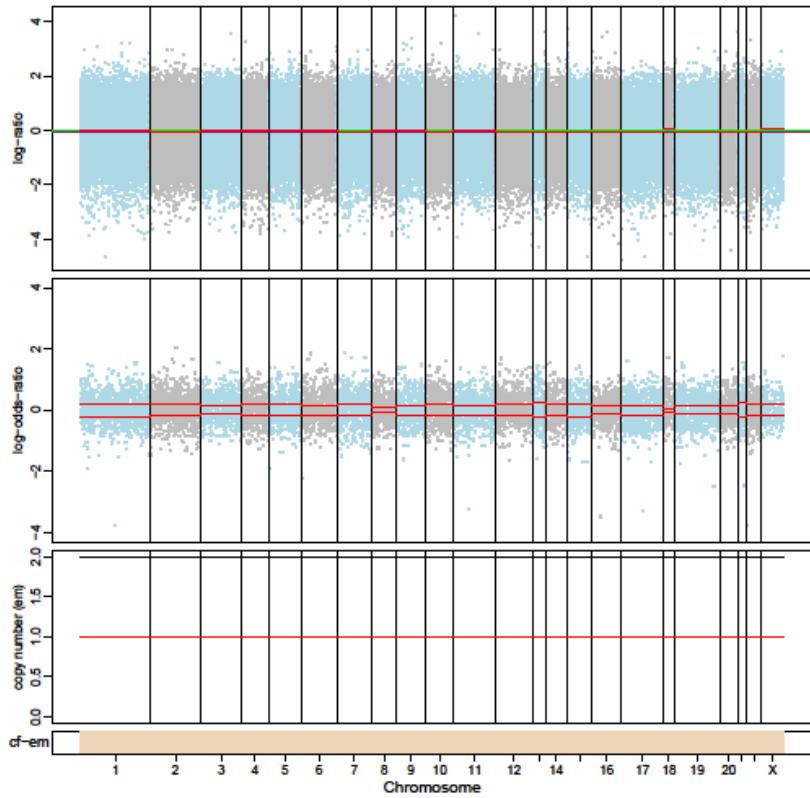

1196-P1

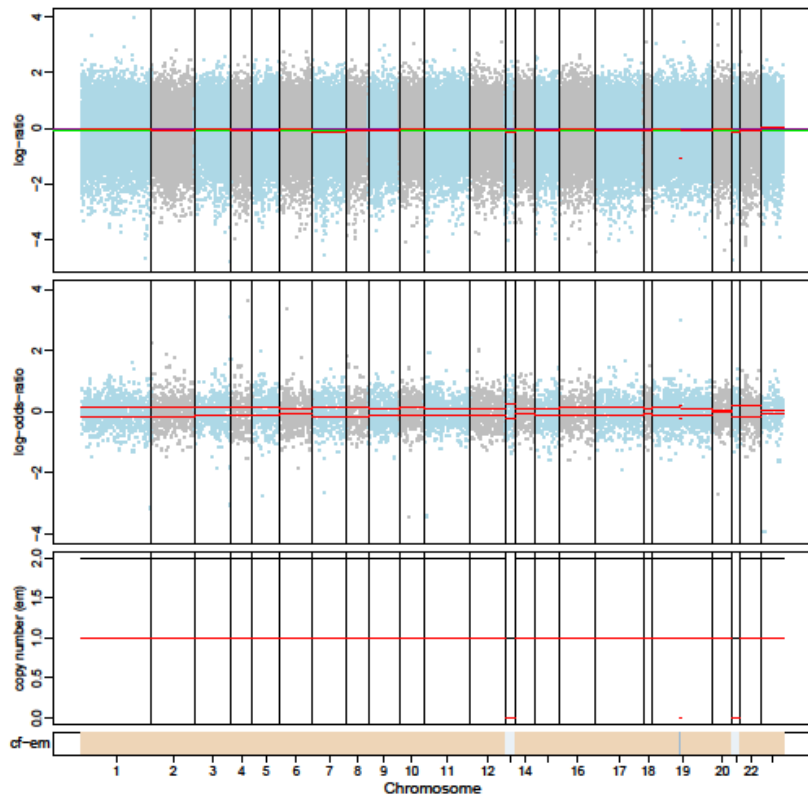

1198-P0

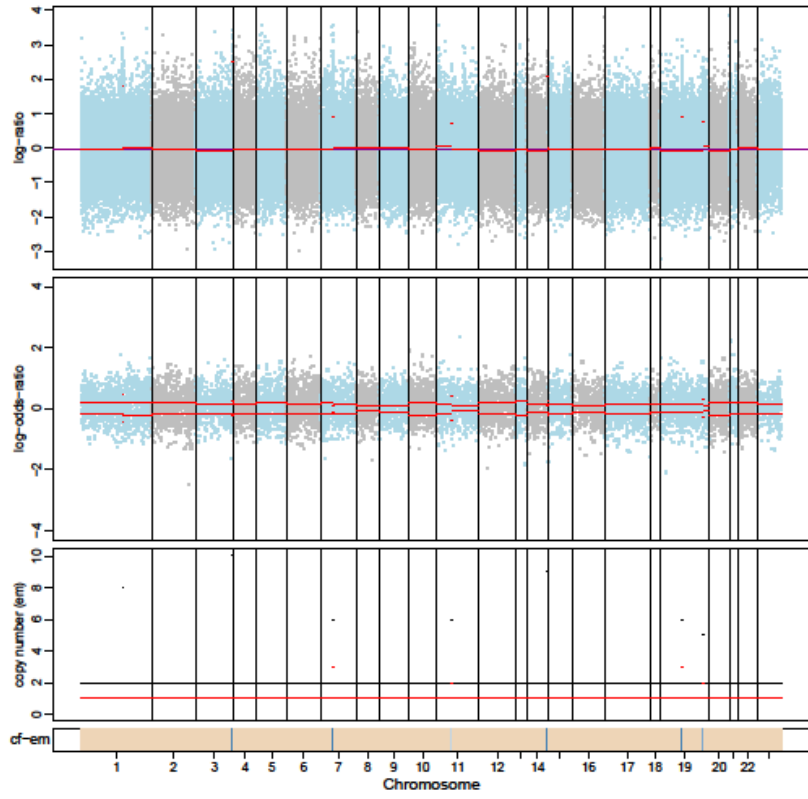

1198-P2

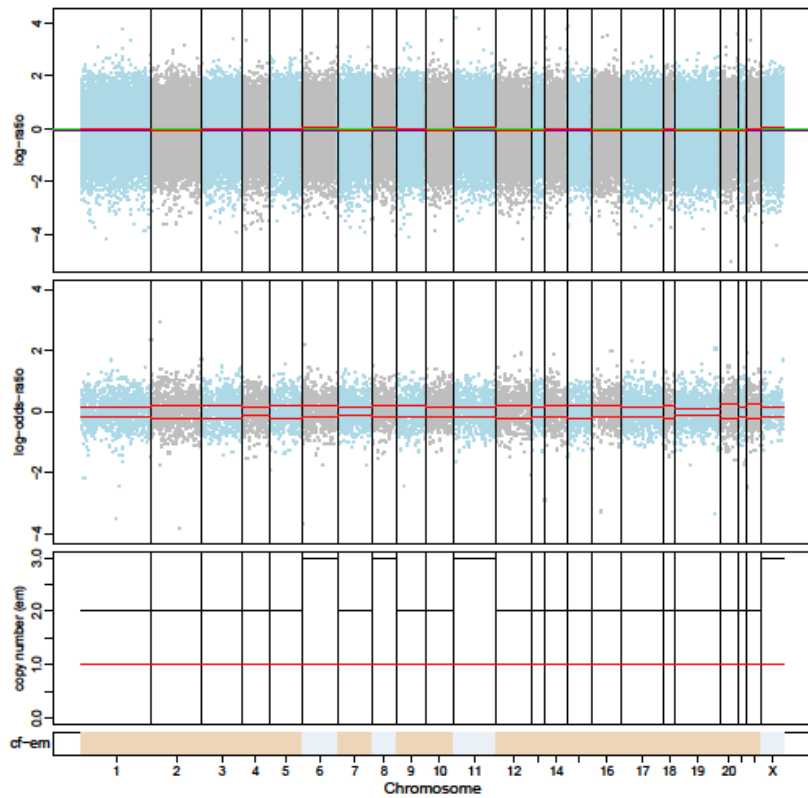

1199-P0

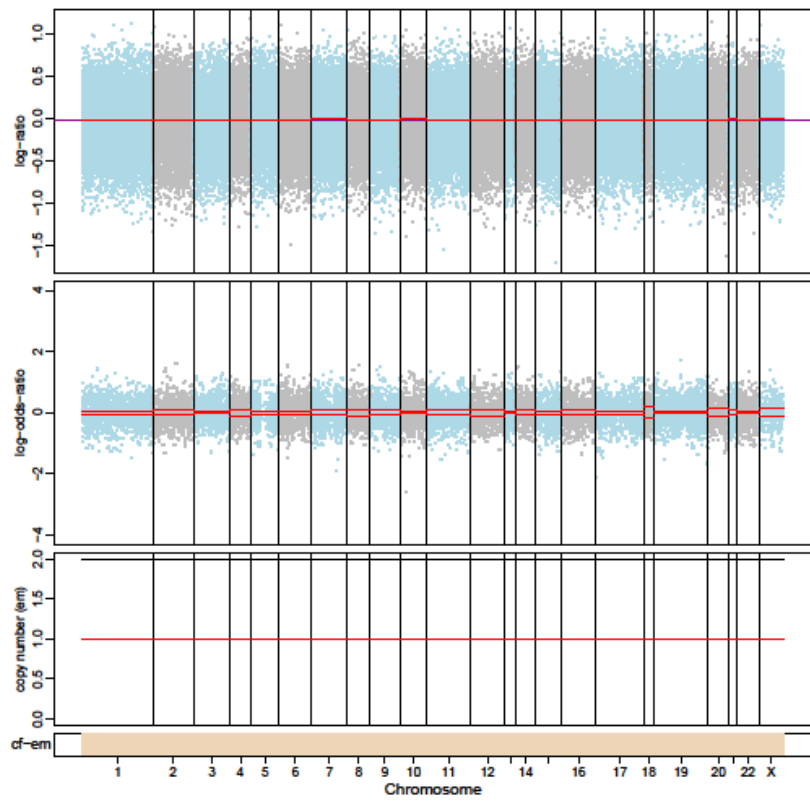

1199-P2

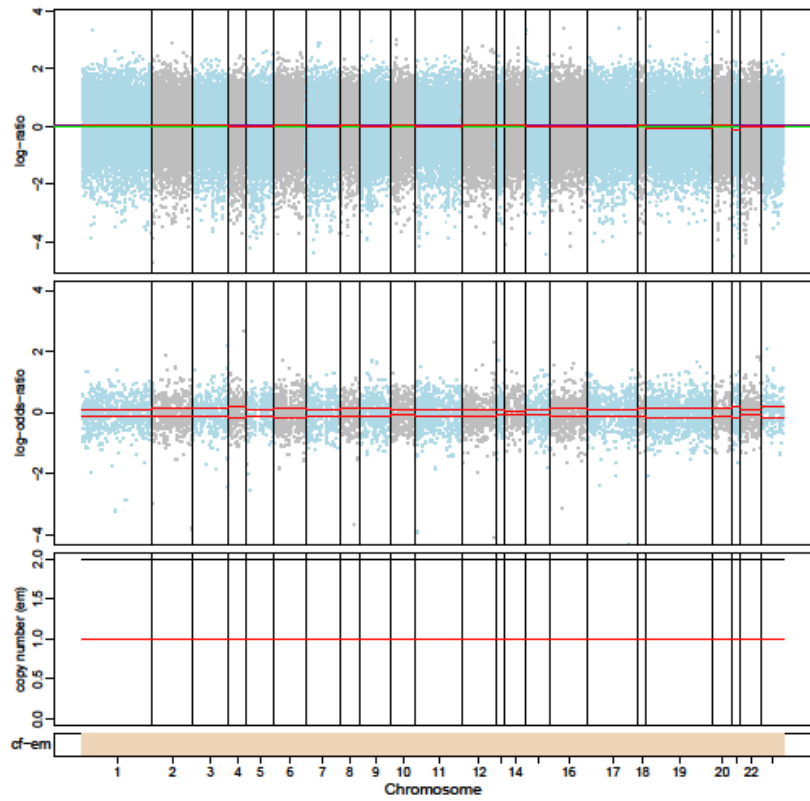

1200-P1

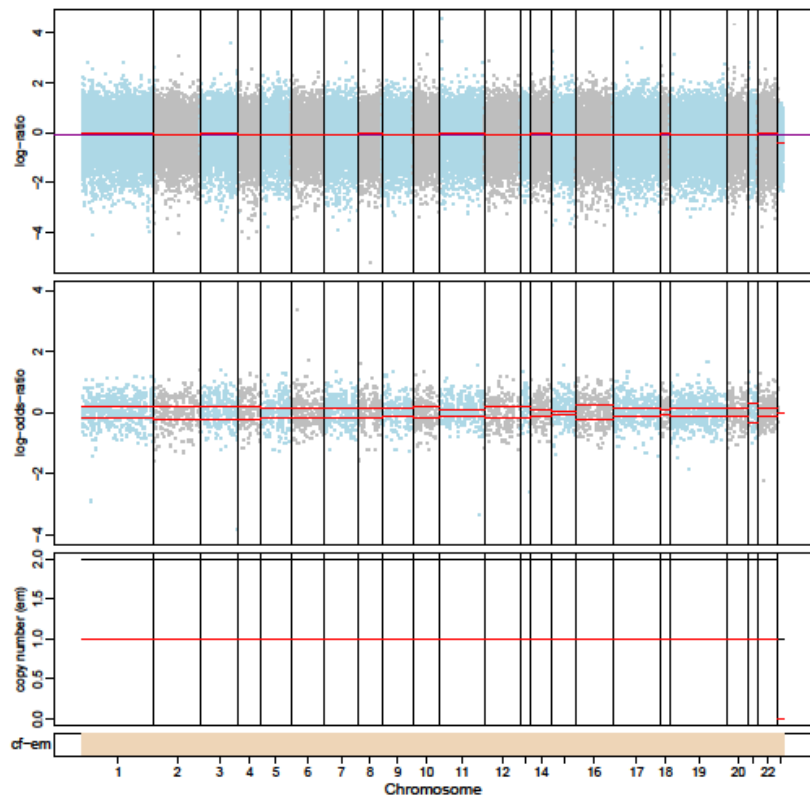

1199-P1

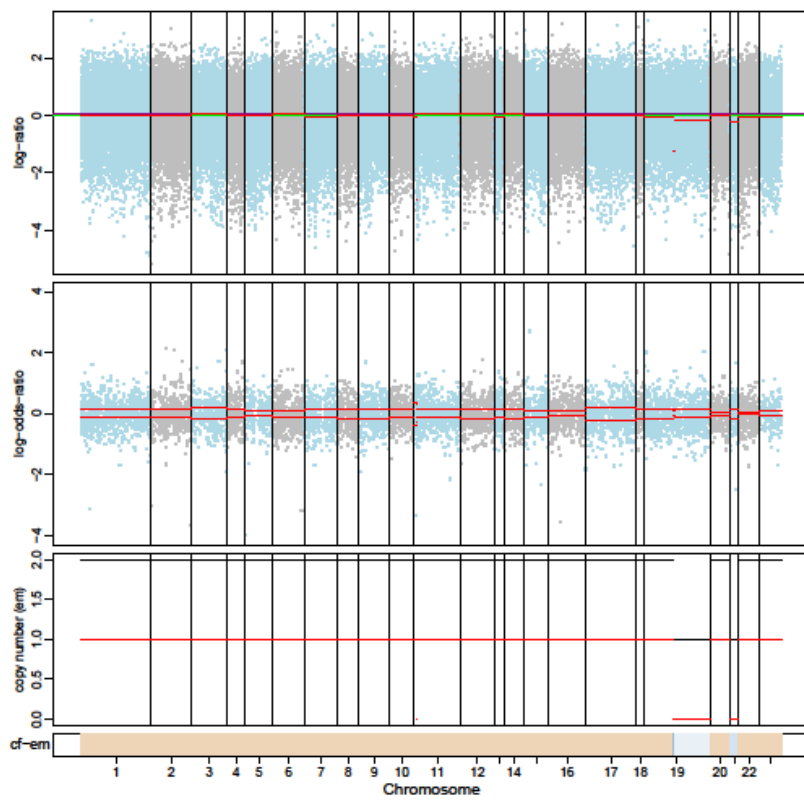

1200-P0

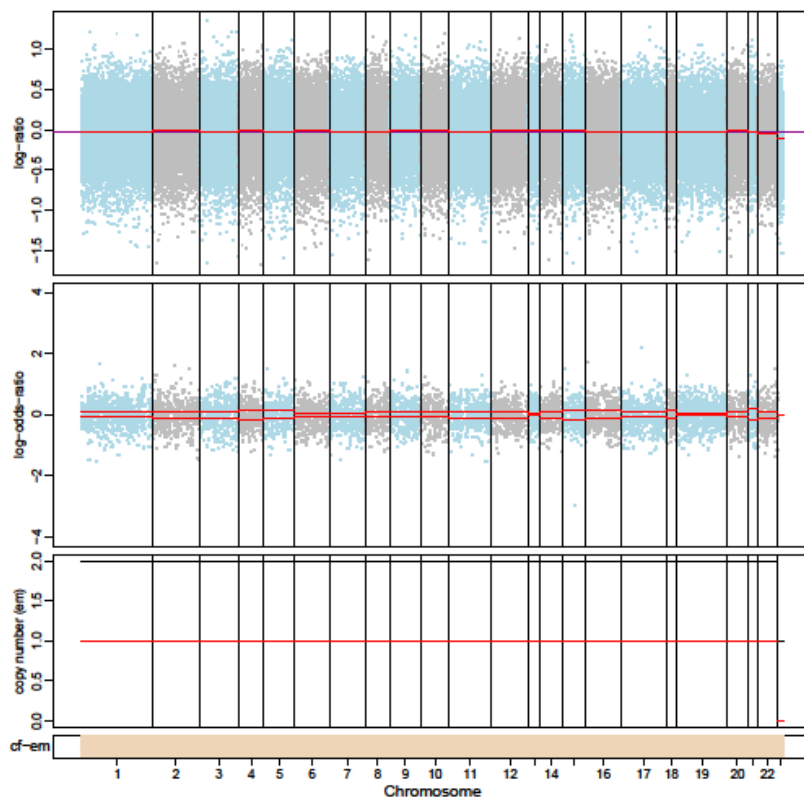

1200-P2

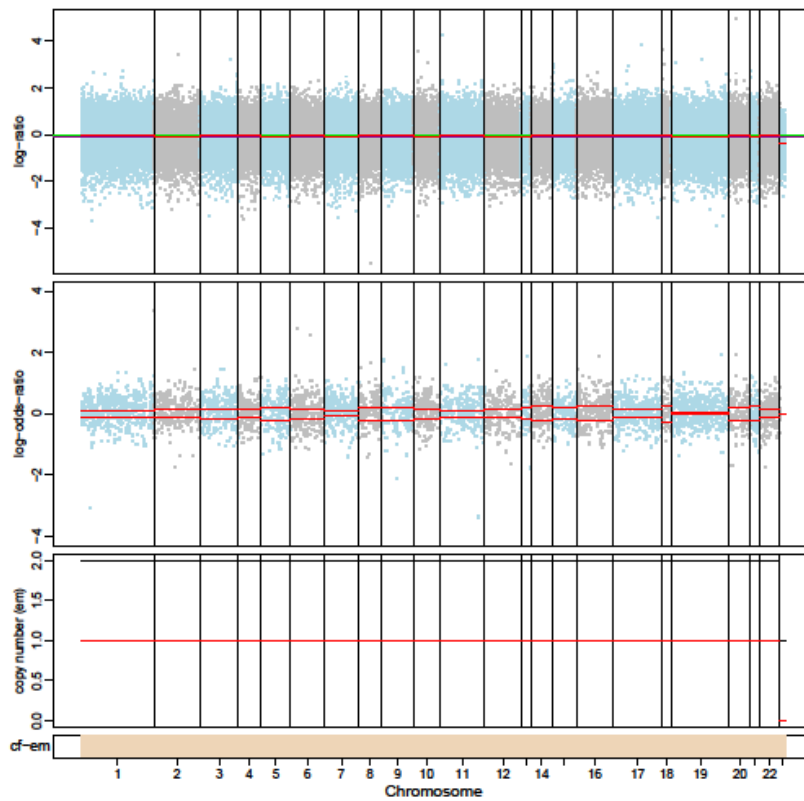

1201-P0

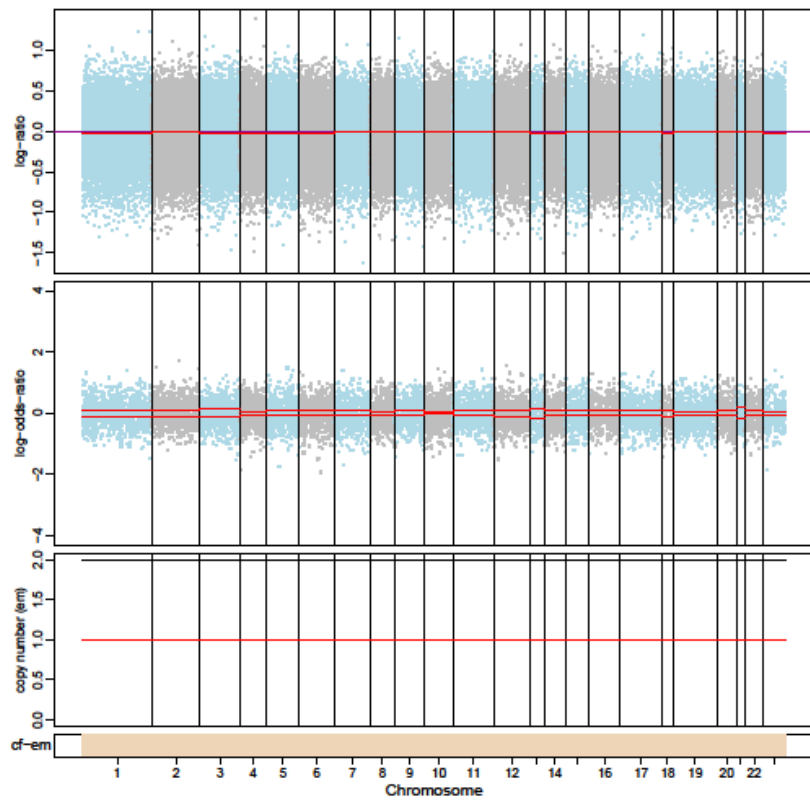

1201-P2

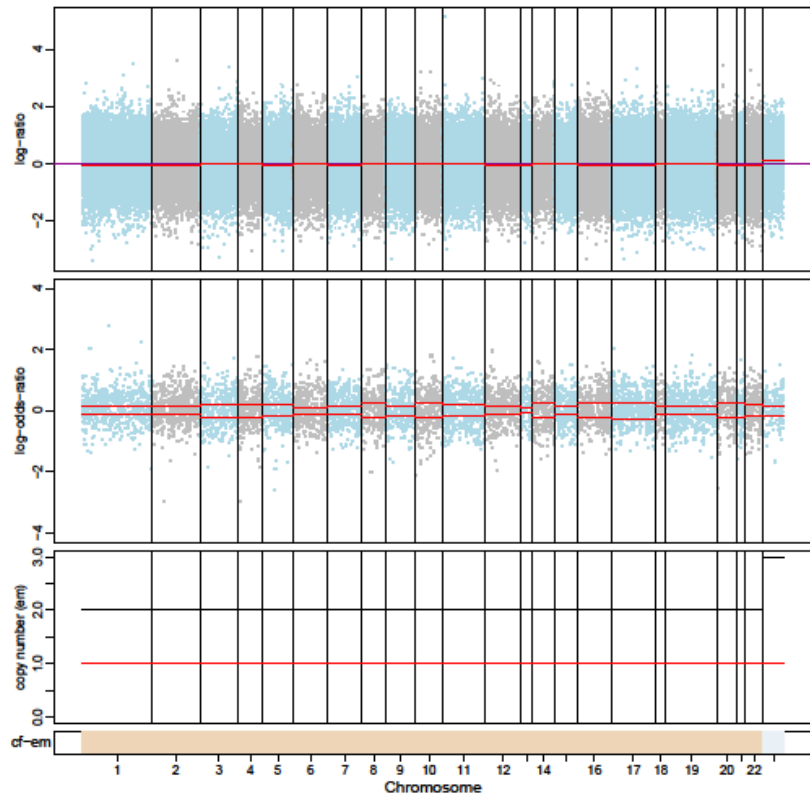

1400-P1

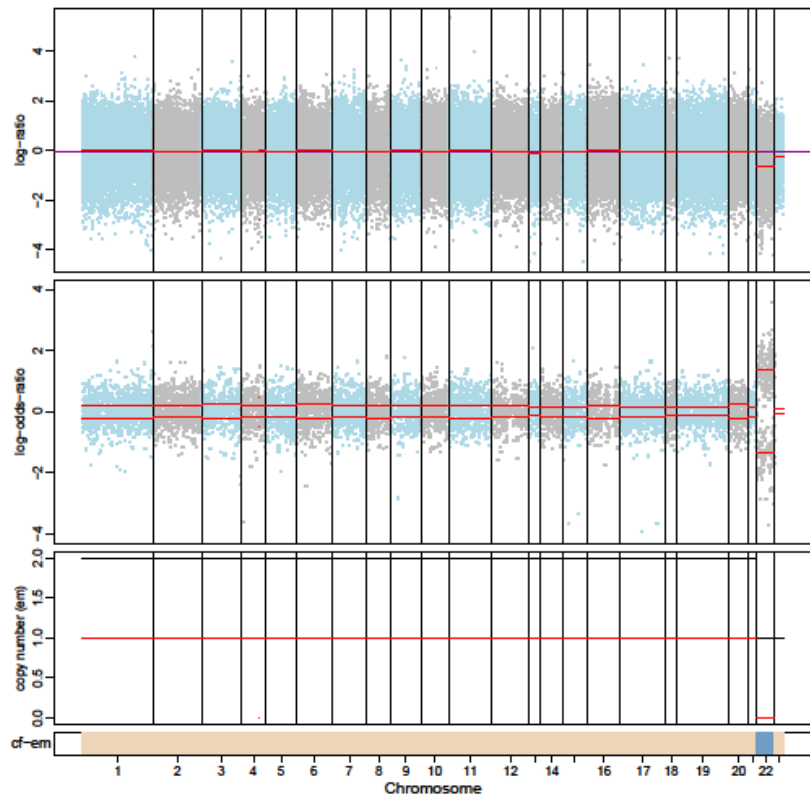

1201-P1

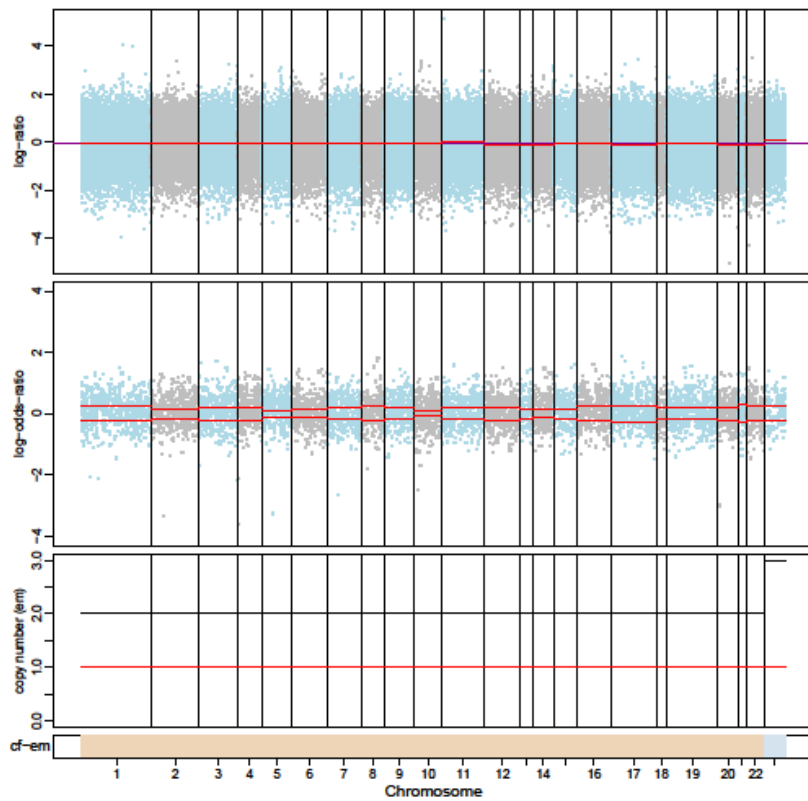

1400-P0

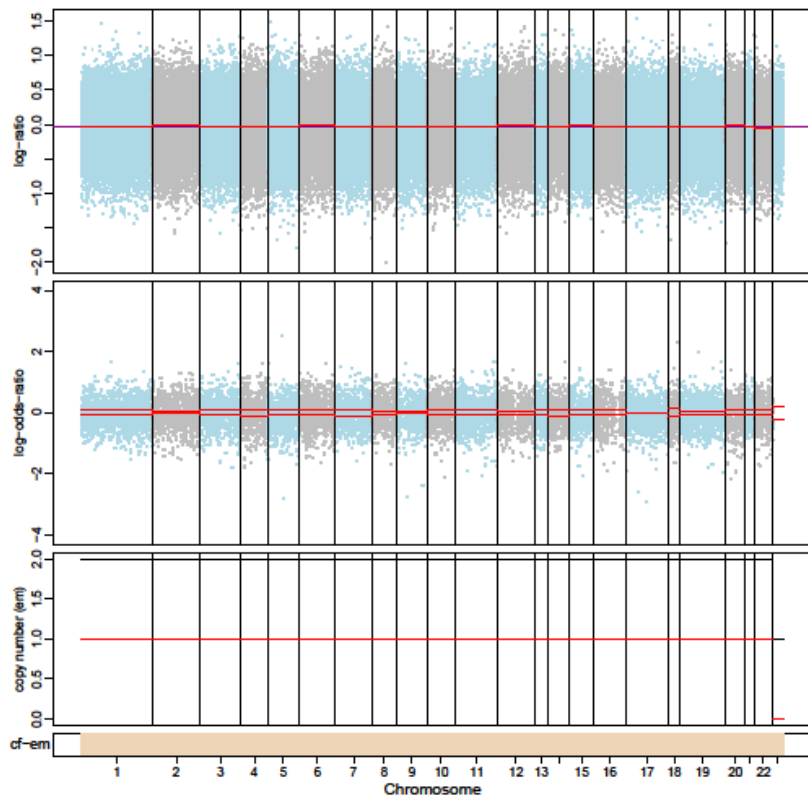

1400-P2

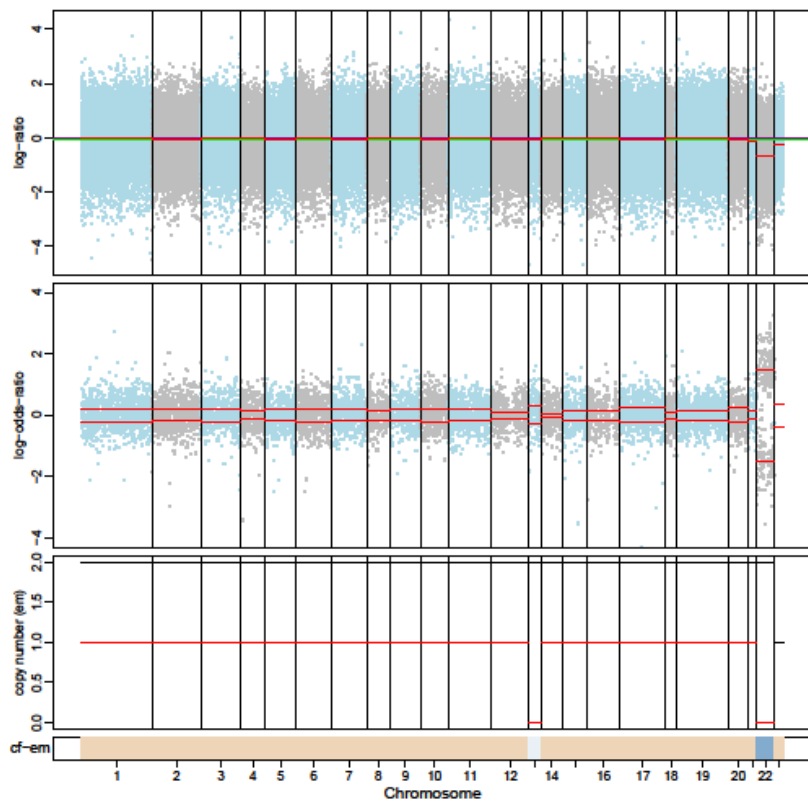



1403-P0

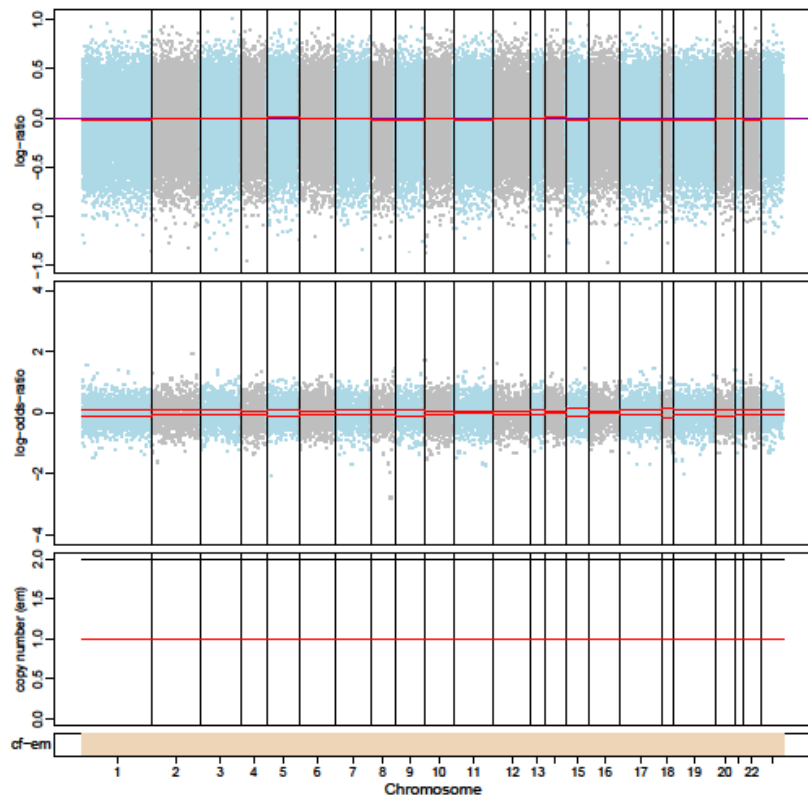

1403-P1

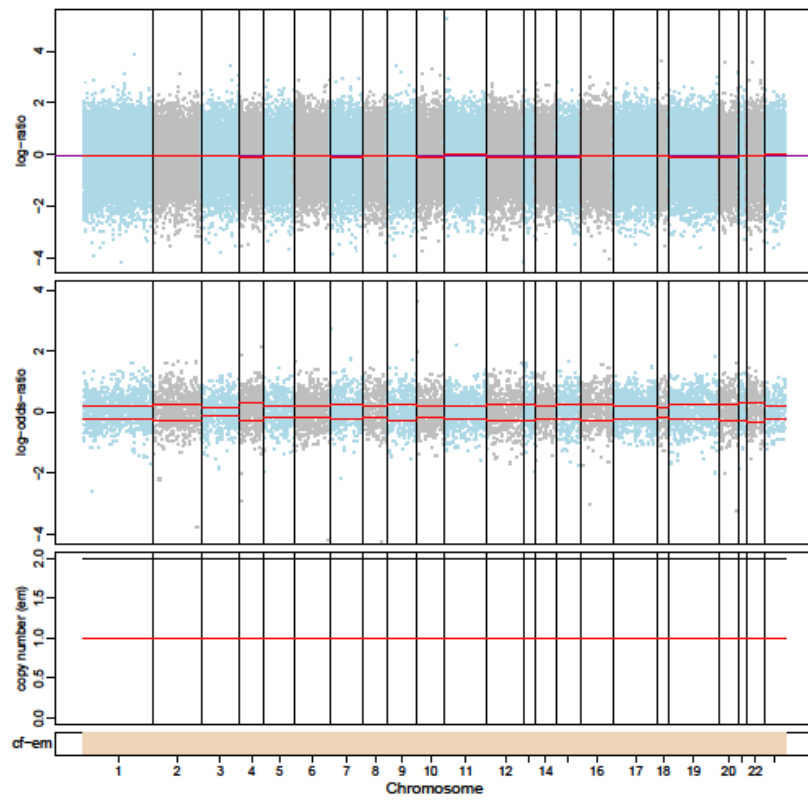

1403-P2

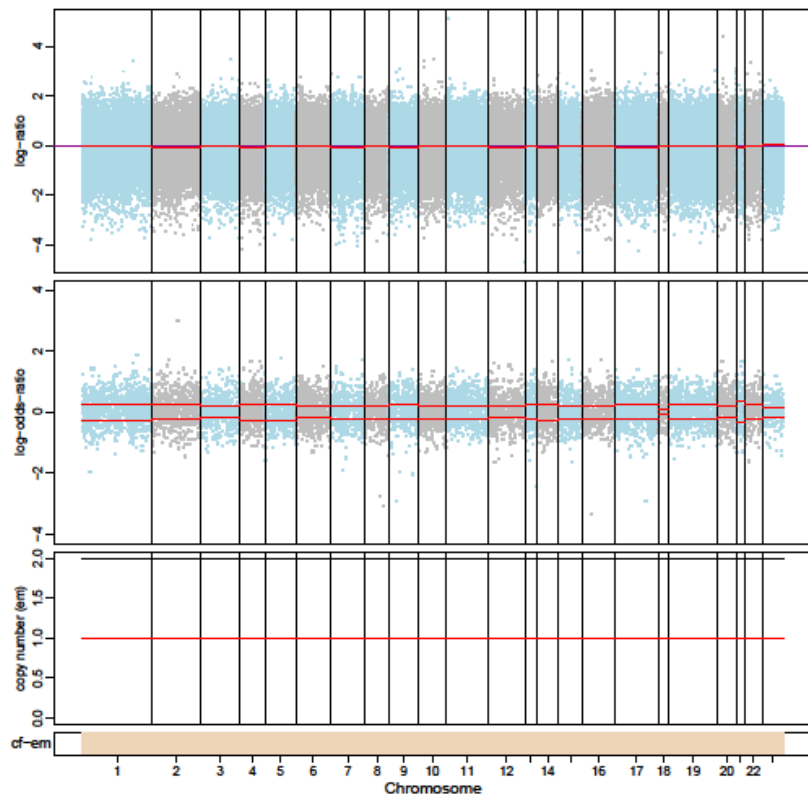

1426-P0

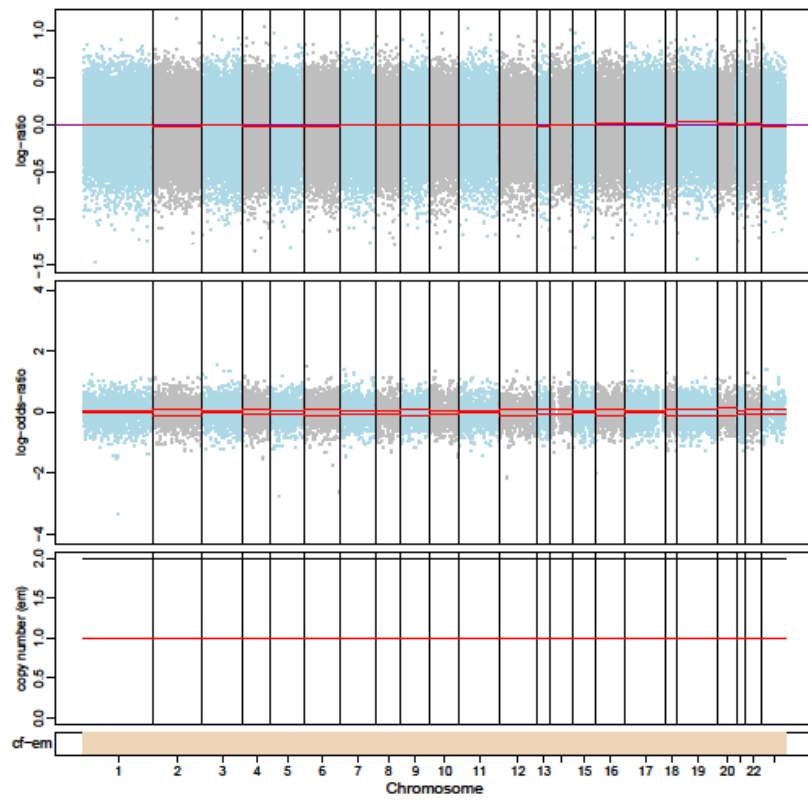

1426-P1

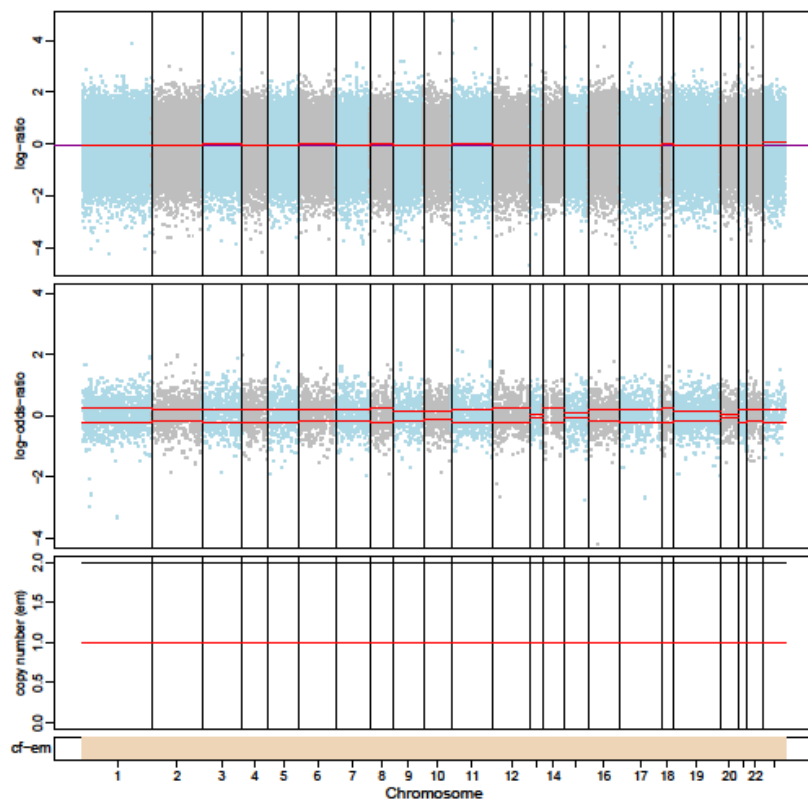

1426-P2

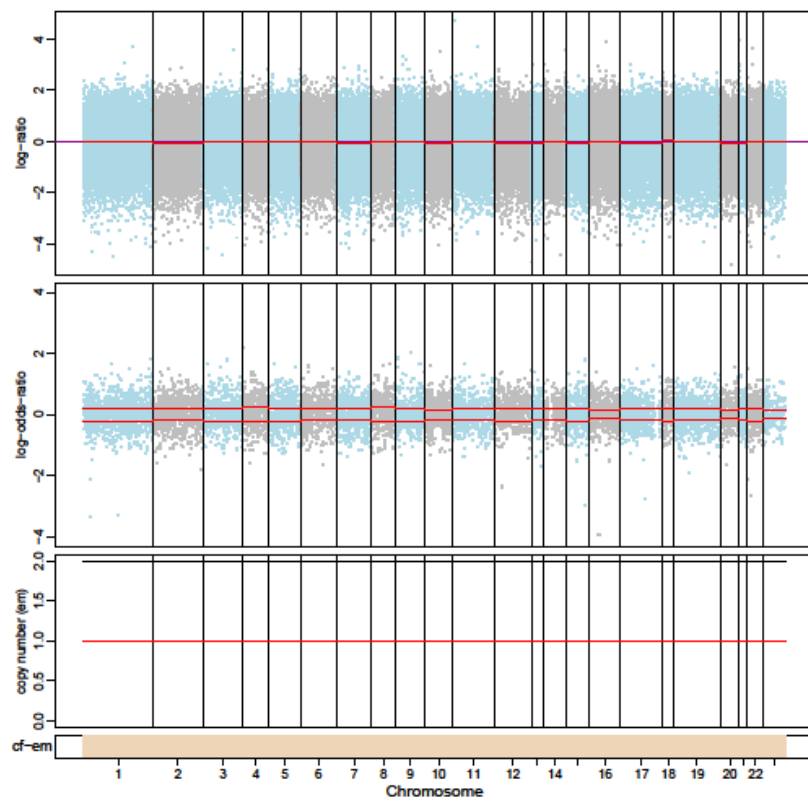

1428-P0

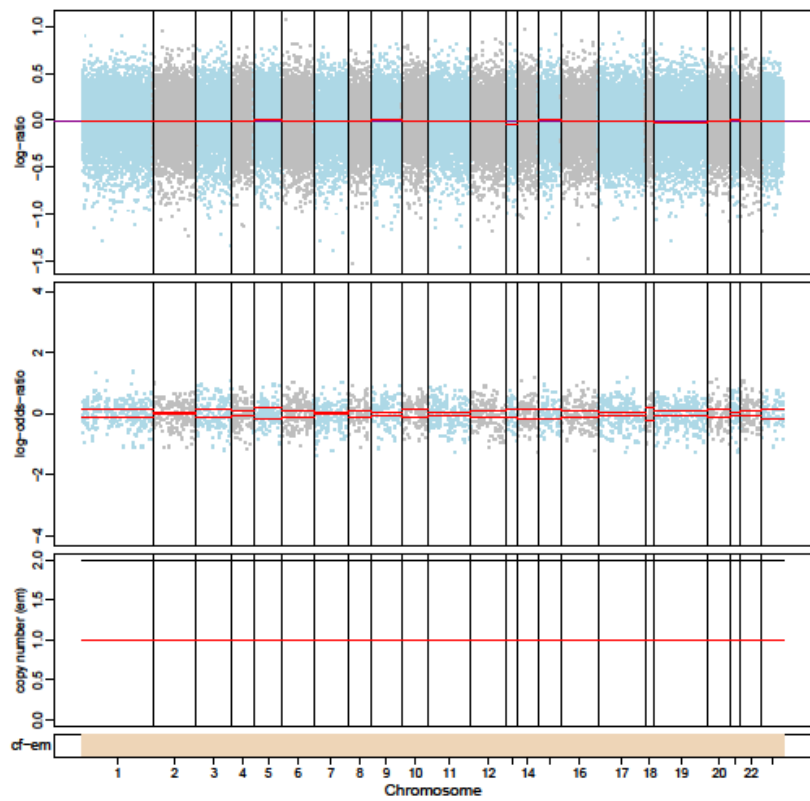

1428-P1

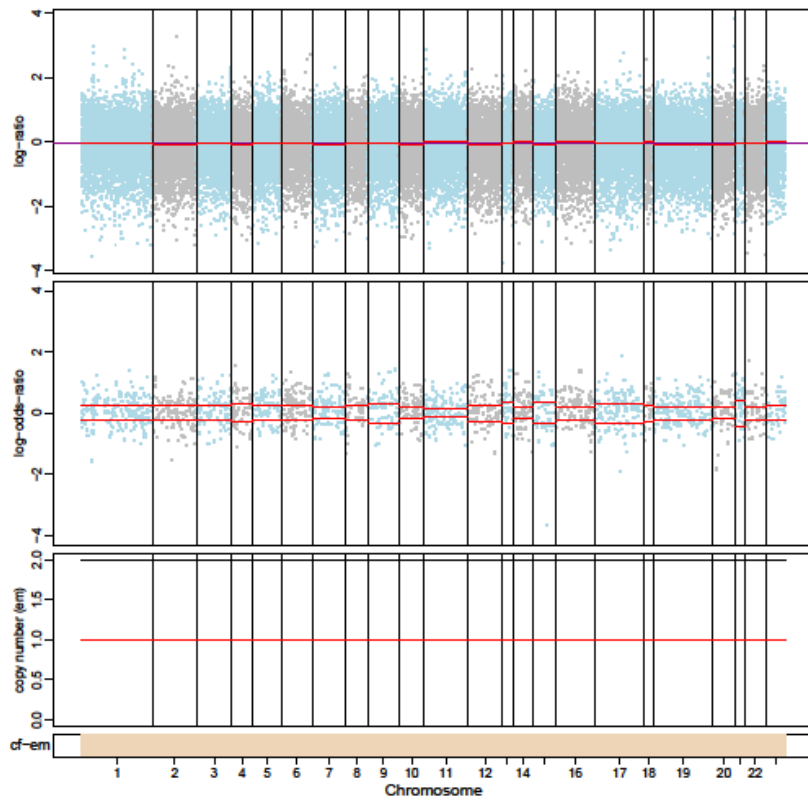

1428-P2

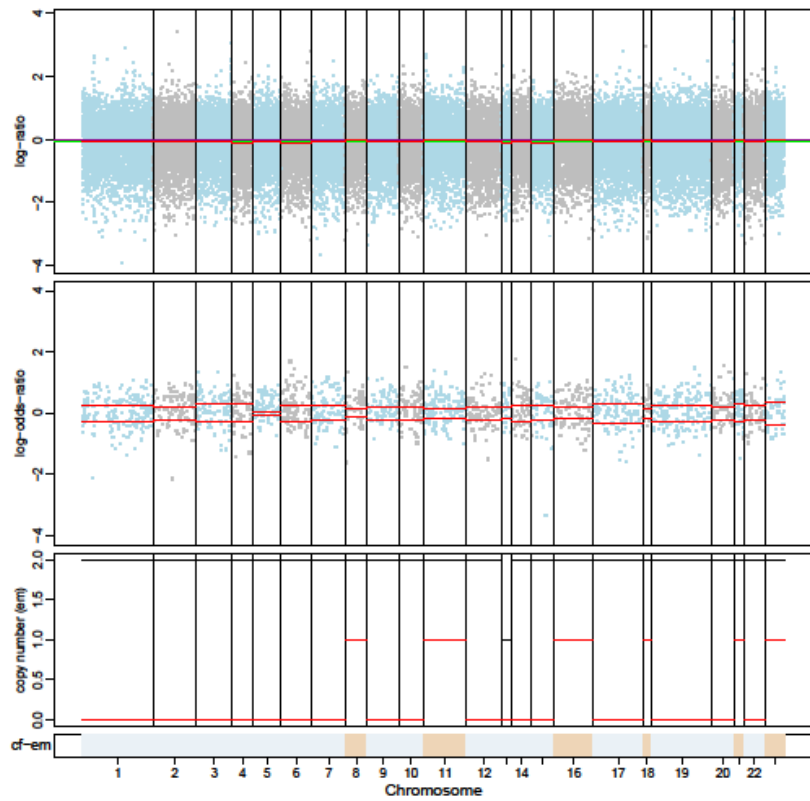

1437-P0

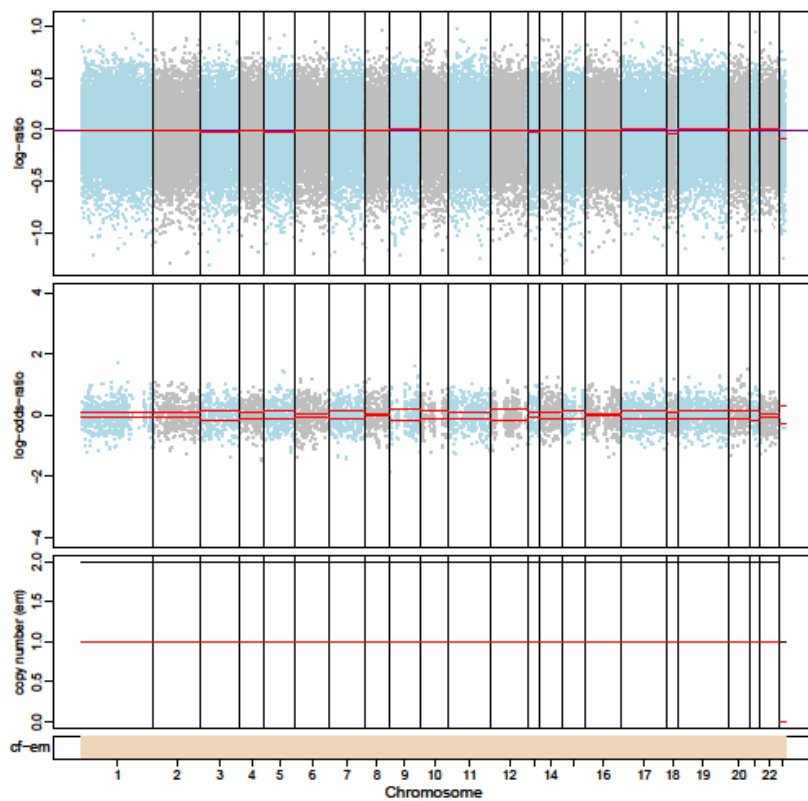

1437-P1

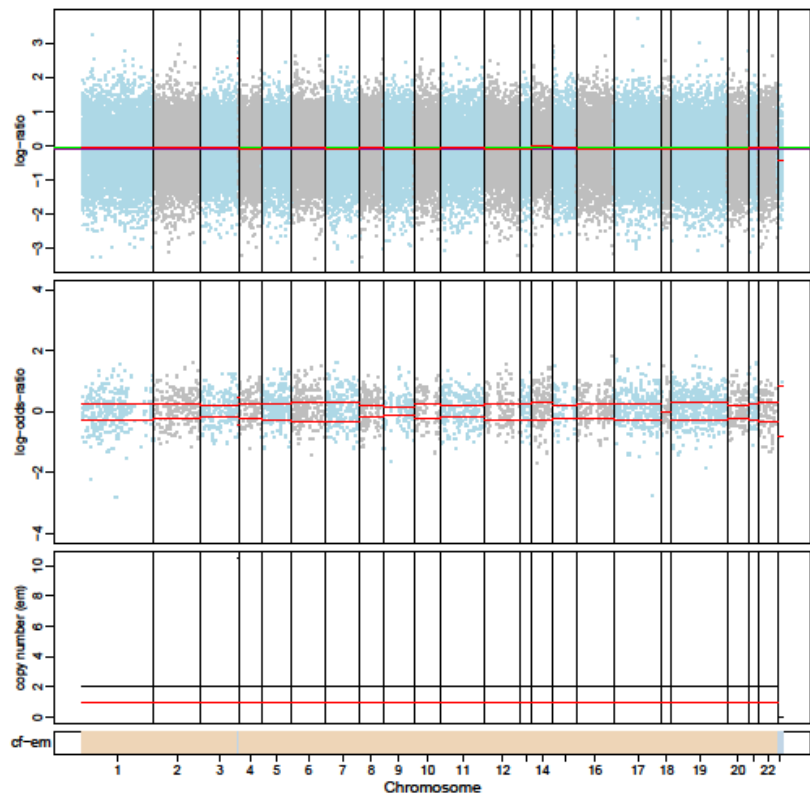

1437-P2

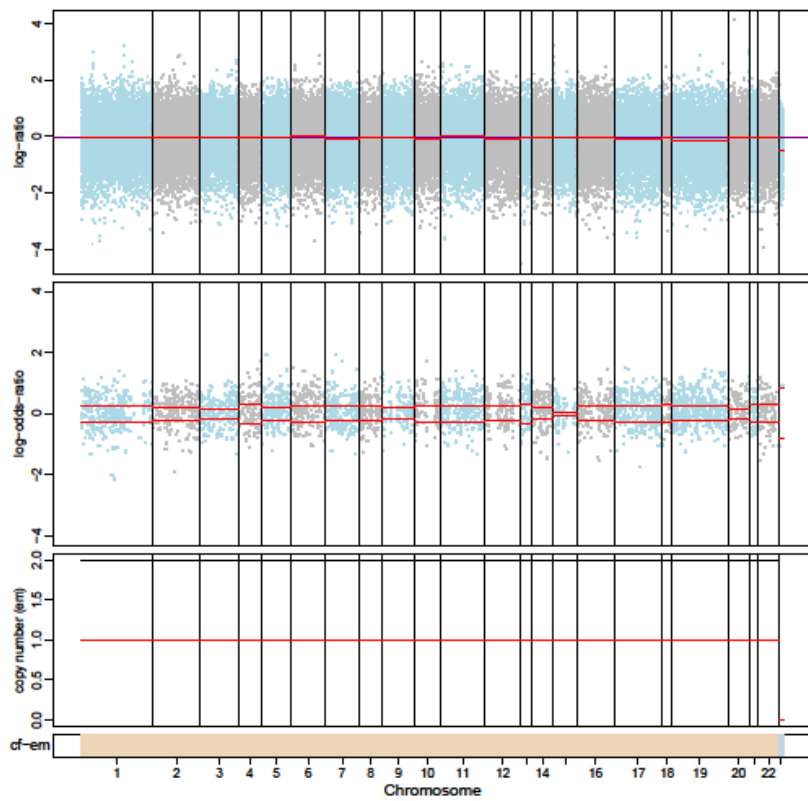

1438-P0

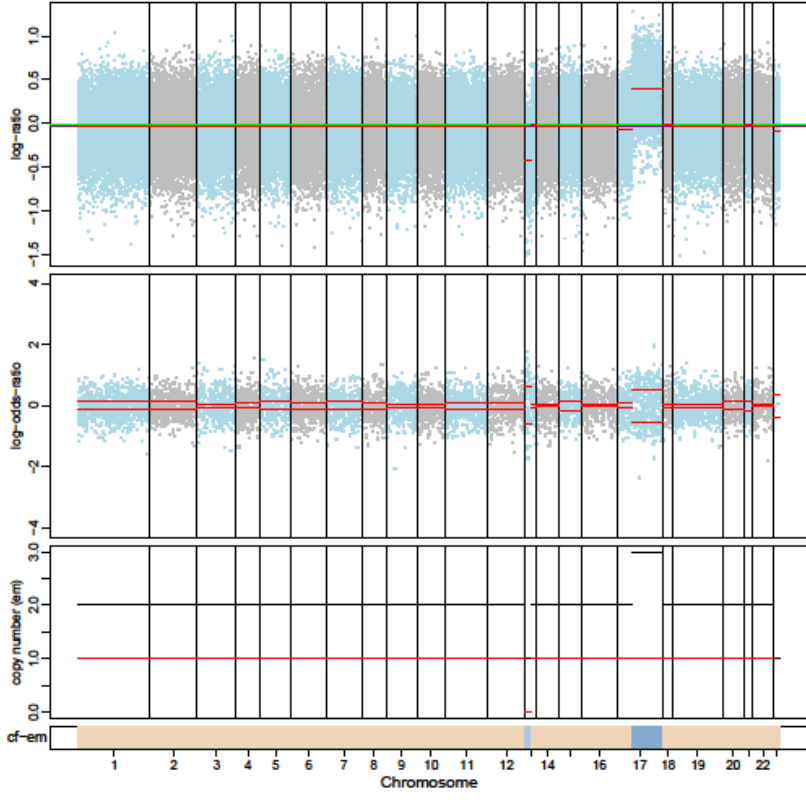

1438-P1

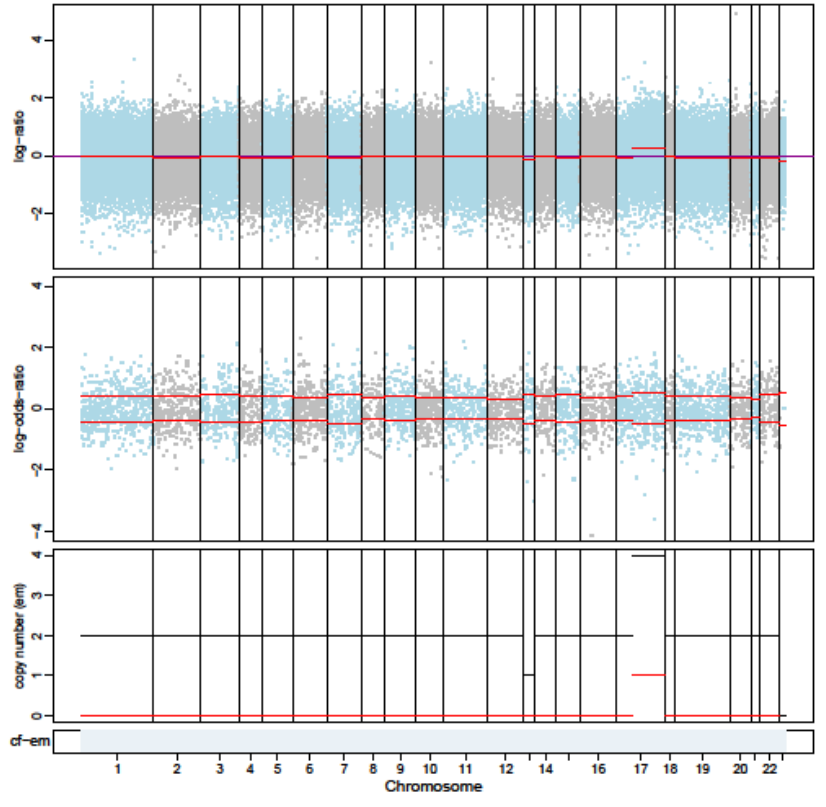

1438-P2

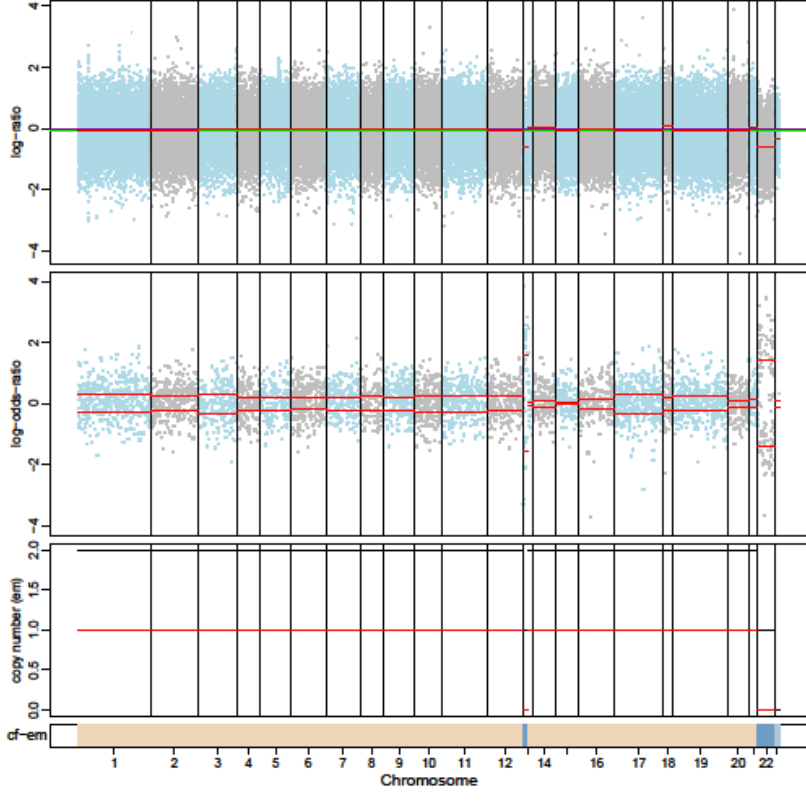

1443-P0

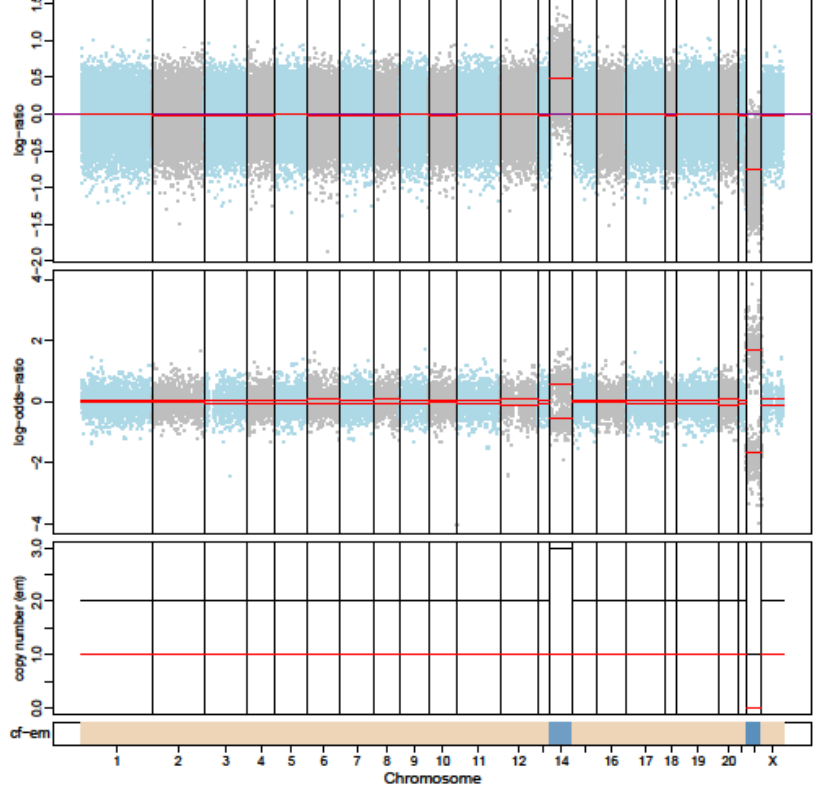

1443-P1

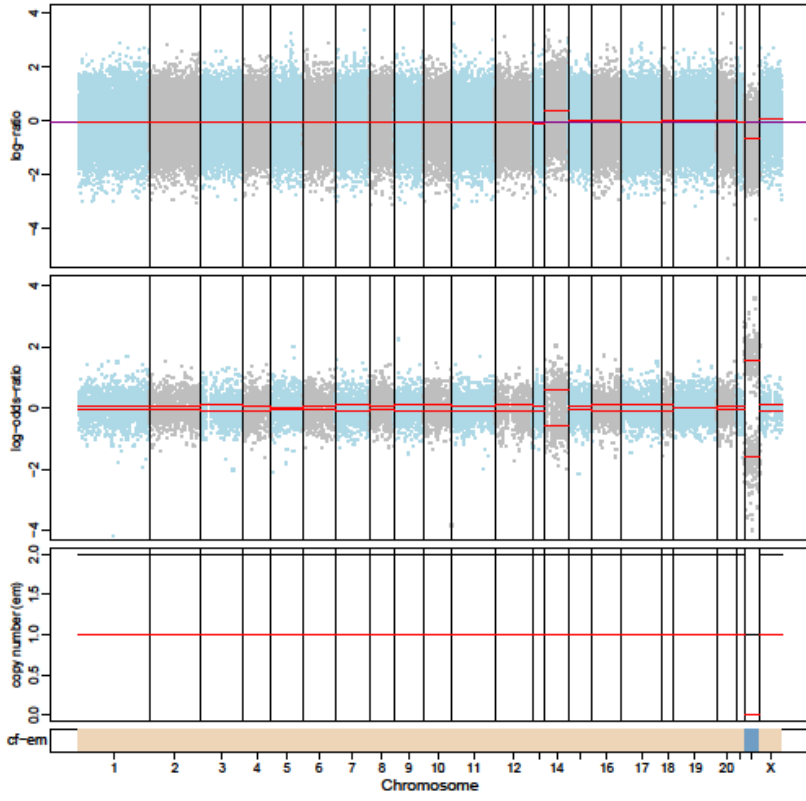

1443-P2

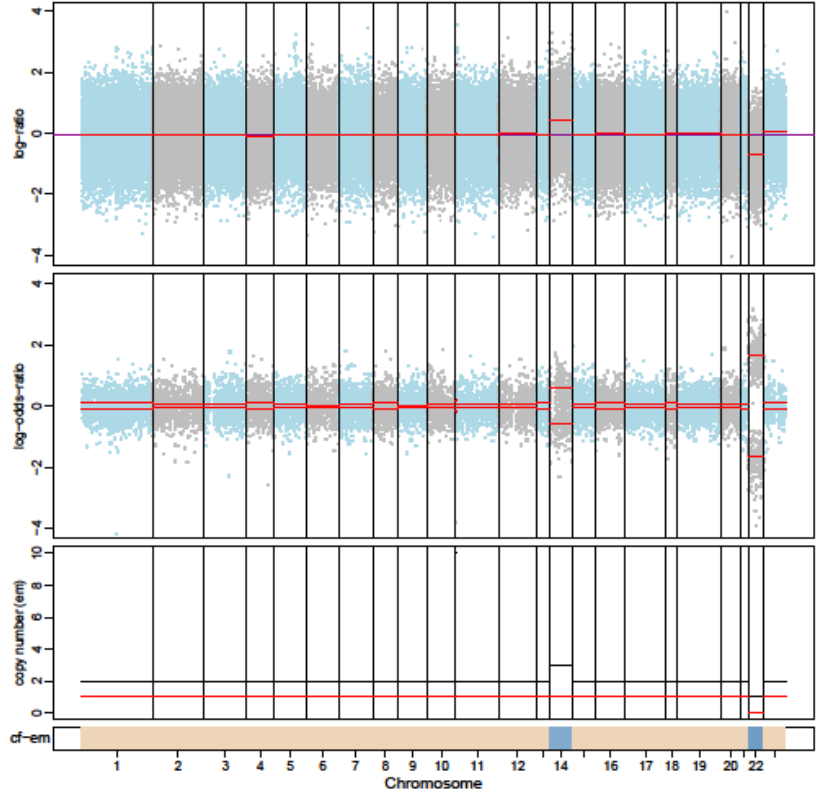

1454-P0

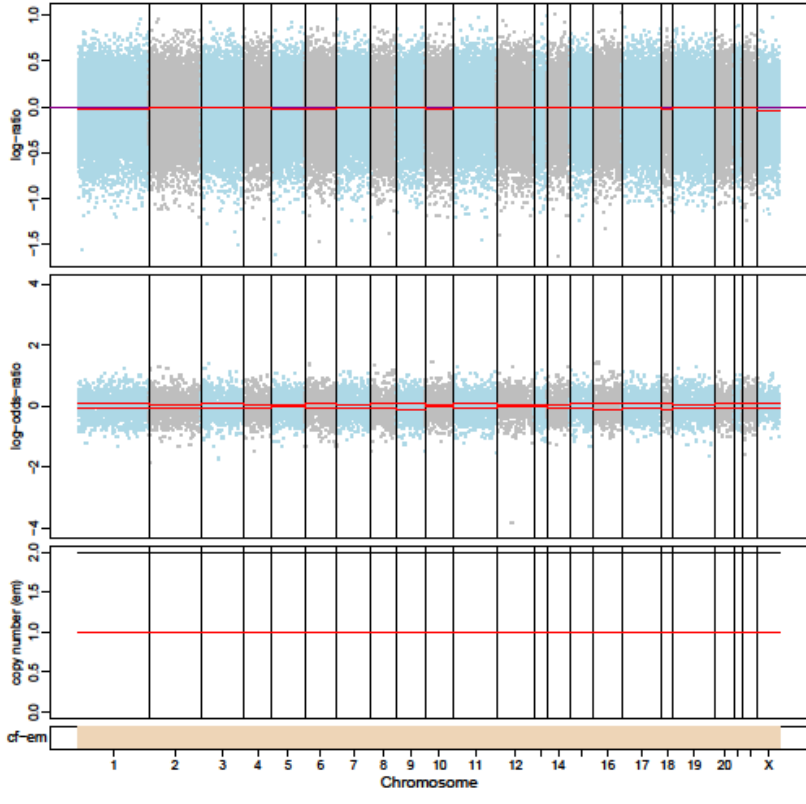

1454-P1

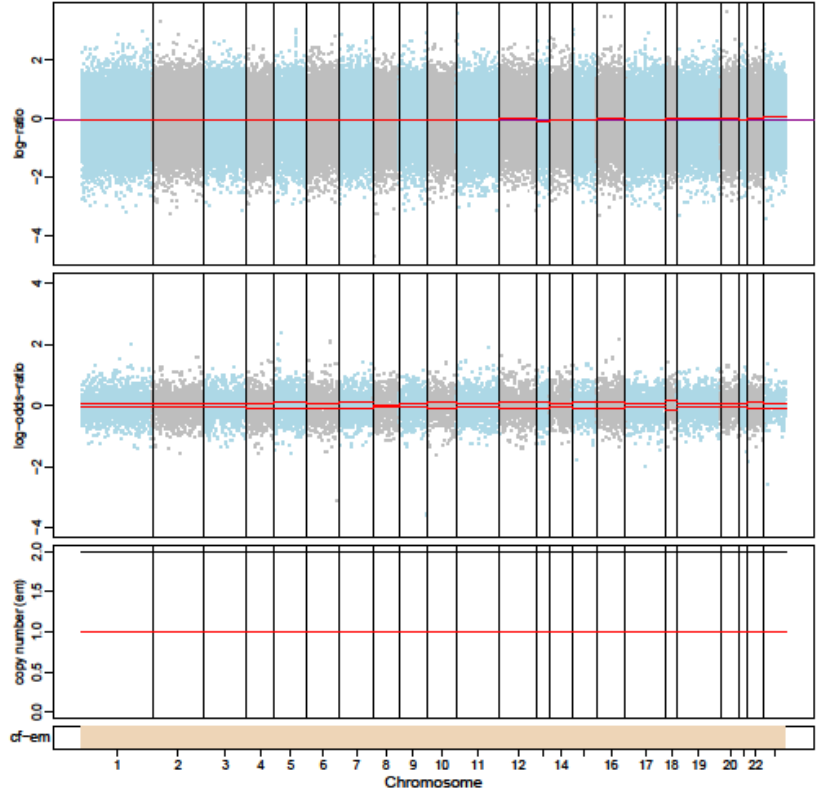

1454-P2

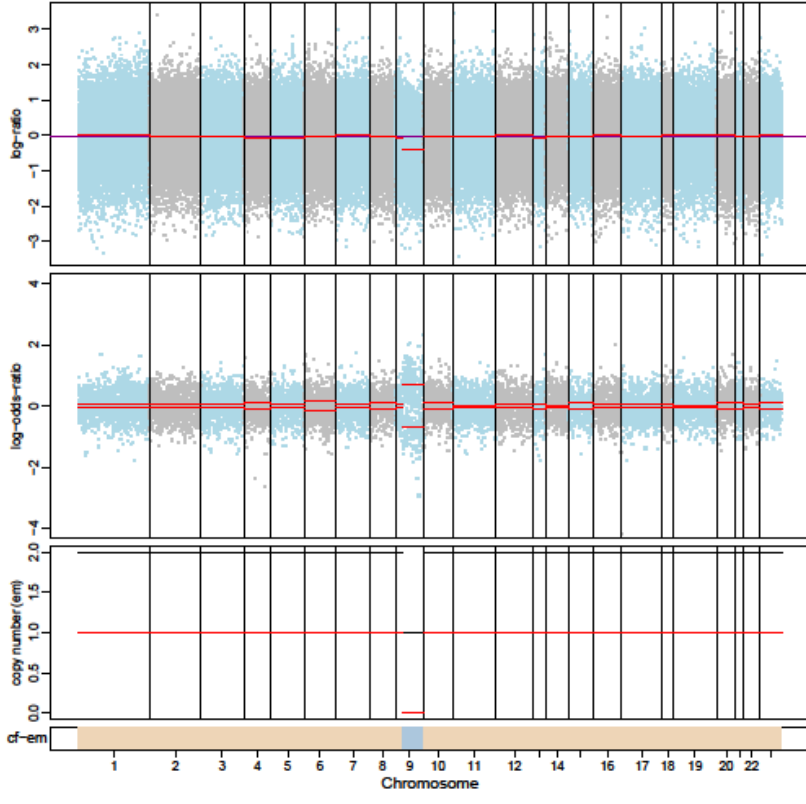

1458-P0

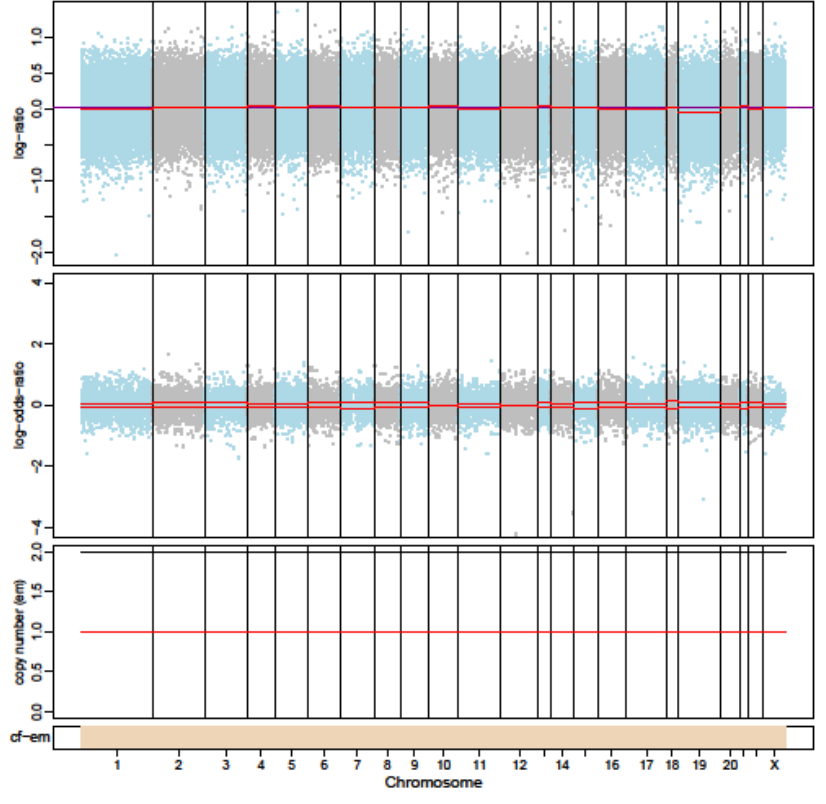

1458-P1

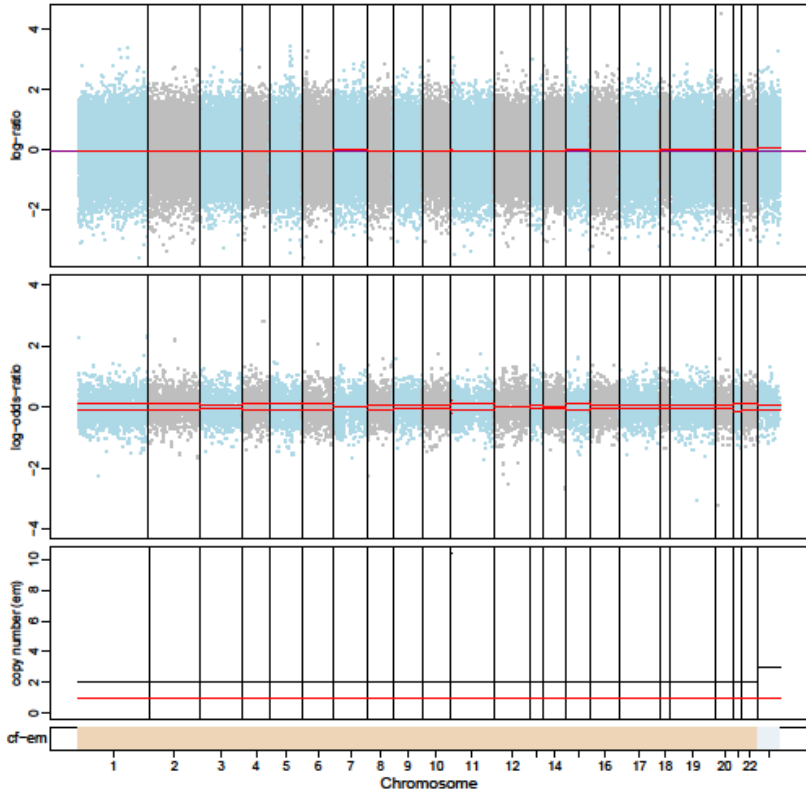

1458-P2

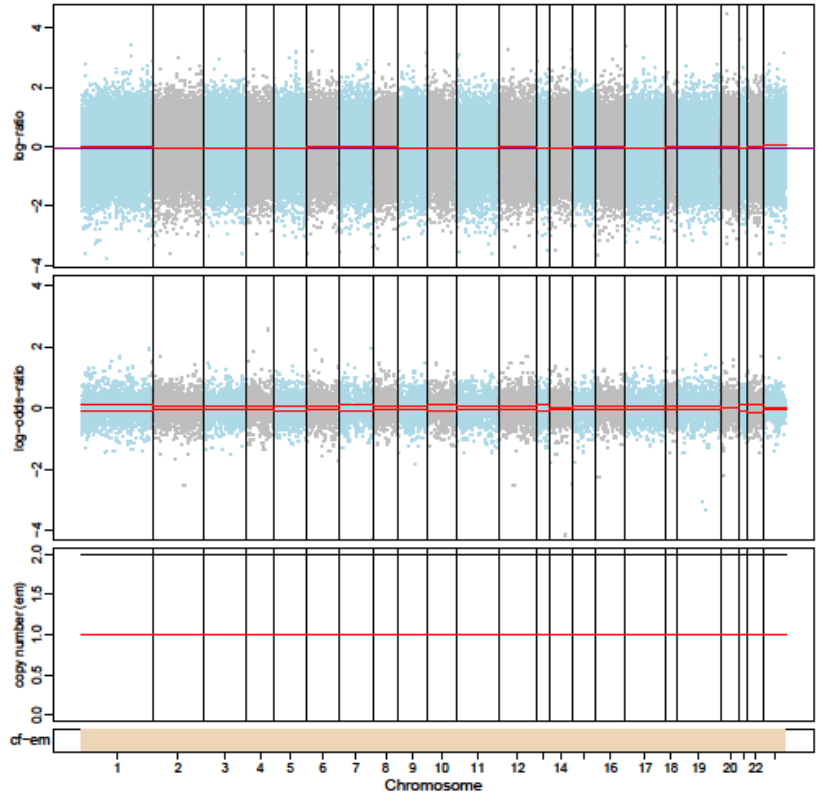

1182-P0

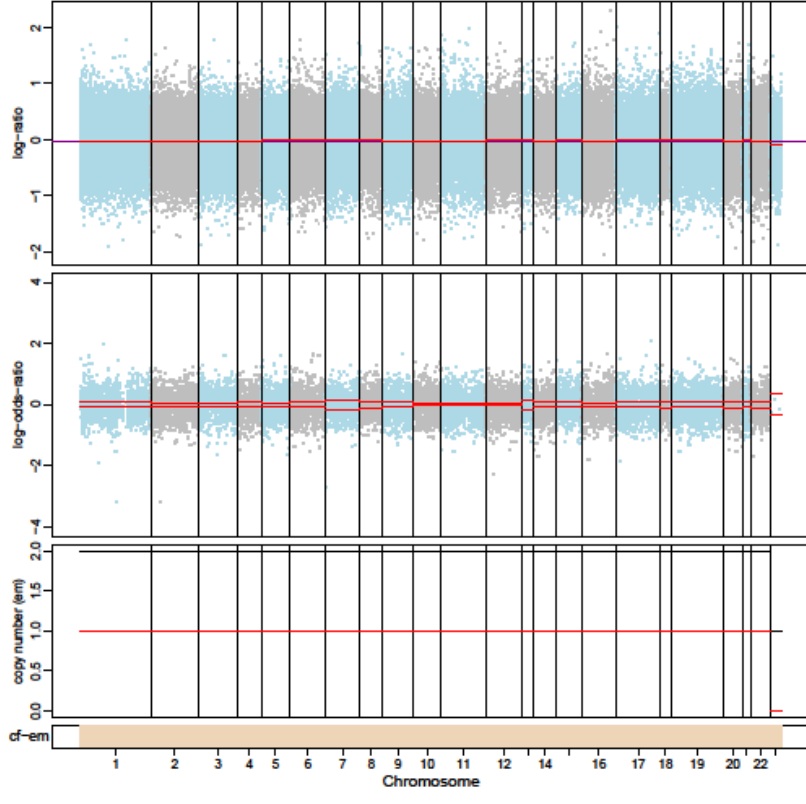

1182-P1

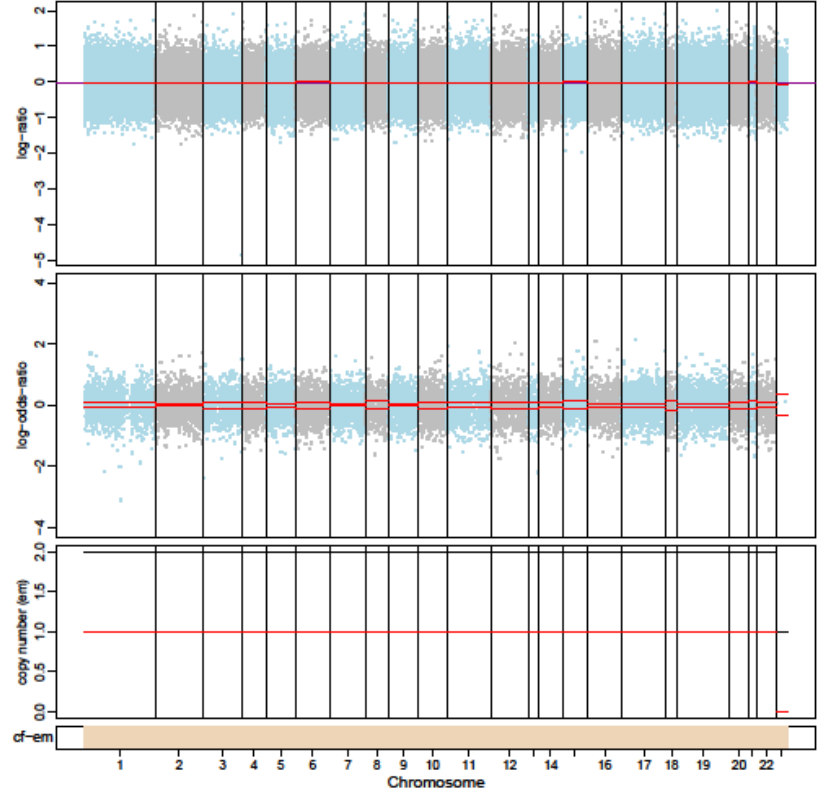

1482-P0

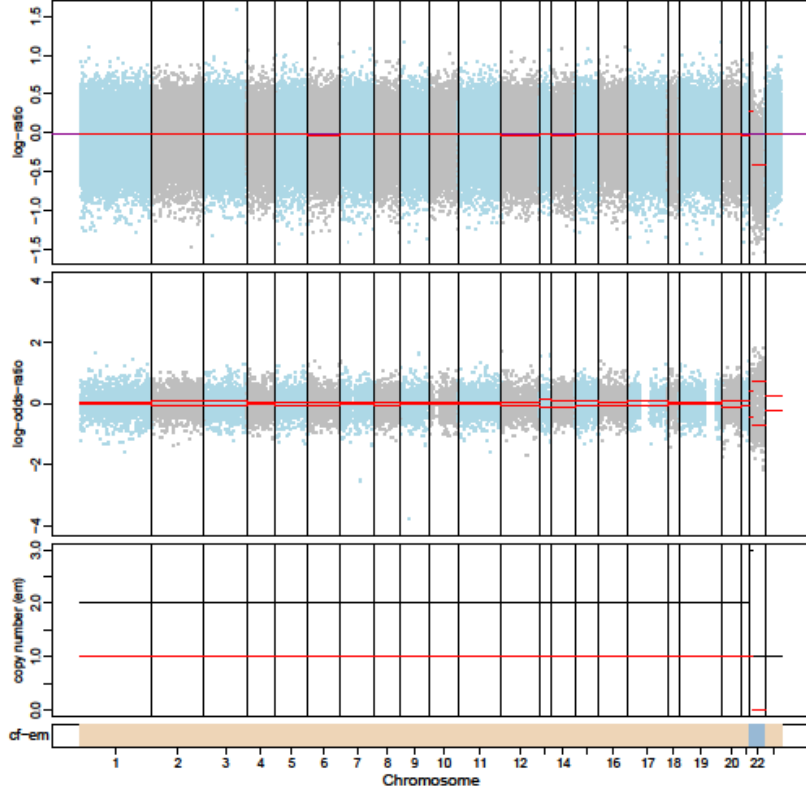

1482-P1

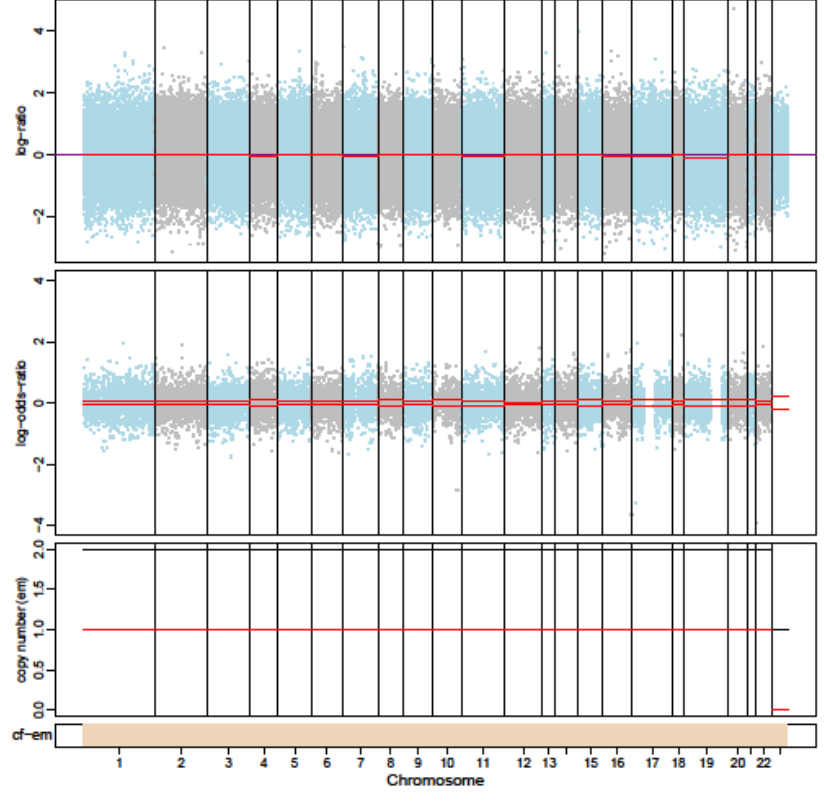

1482-P2

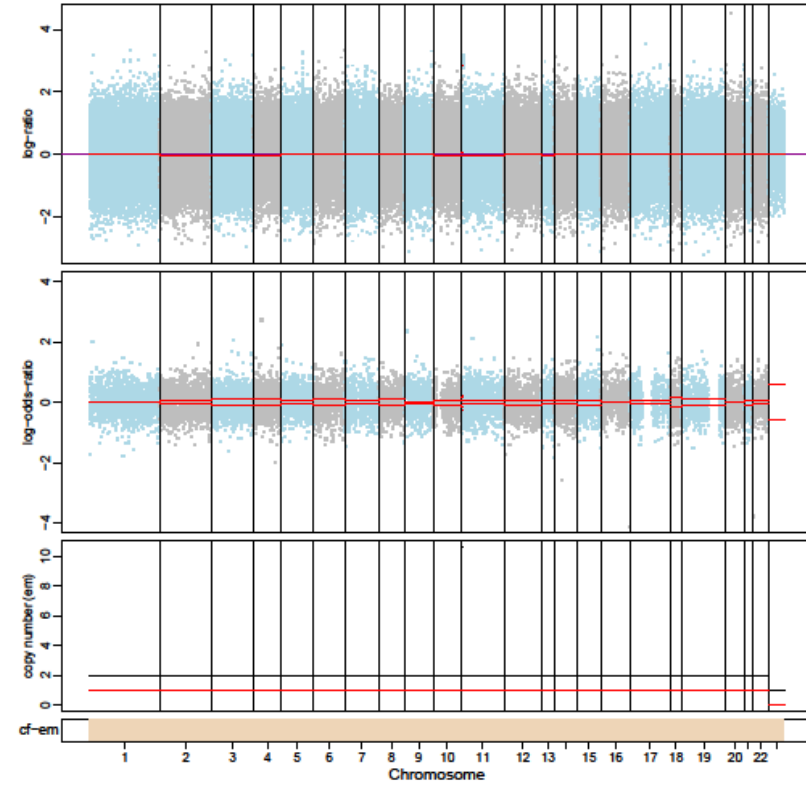

1491-P0

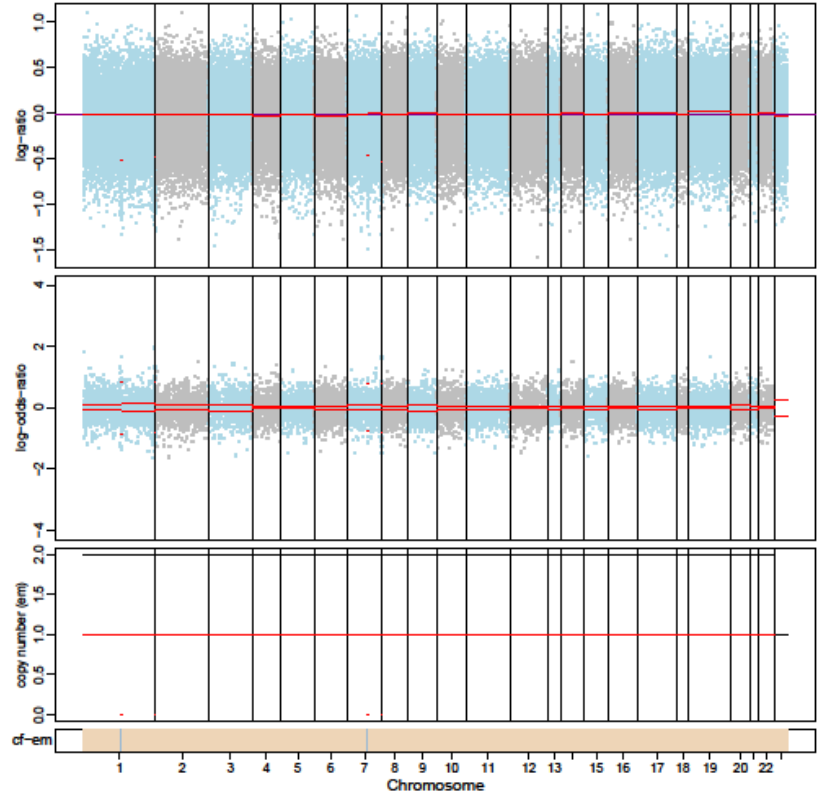

1491-P1

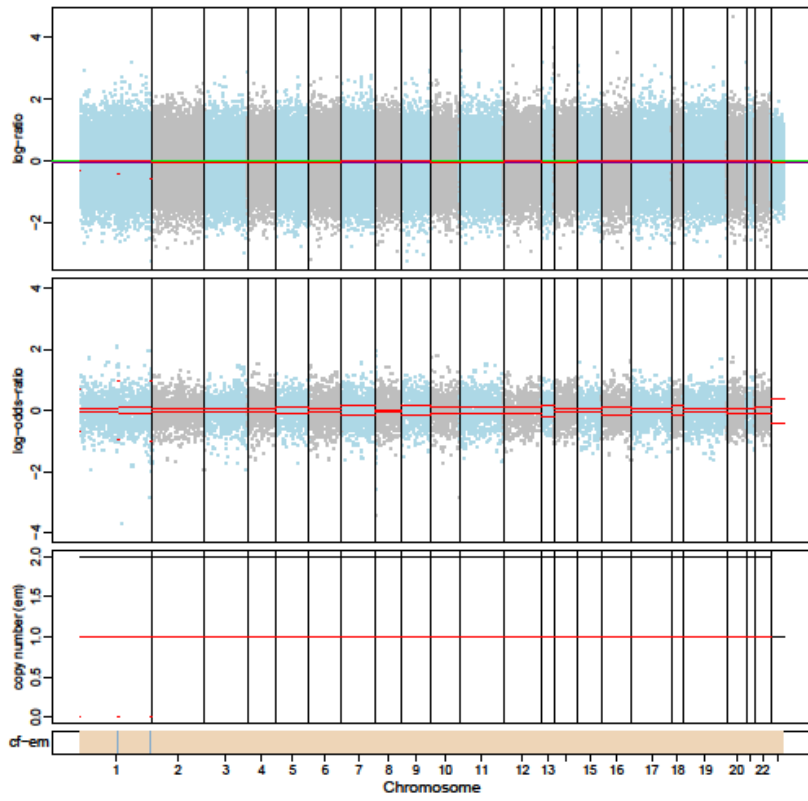

1491-P2

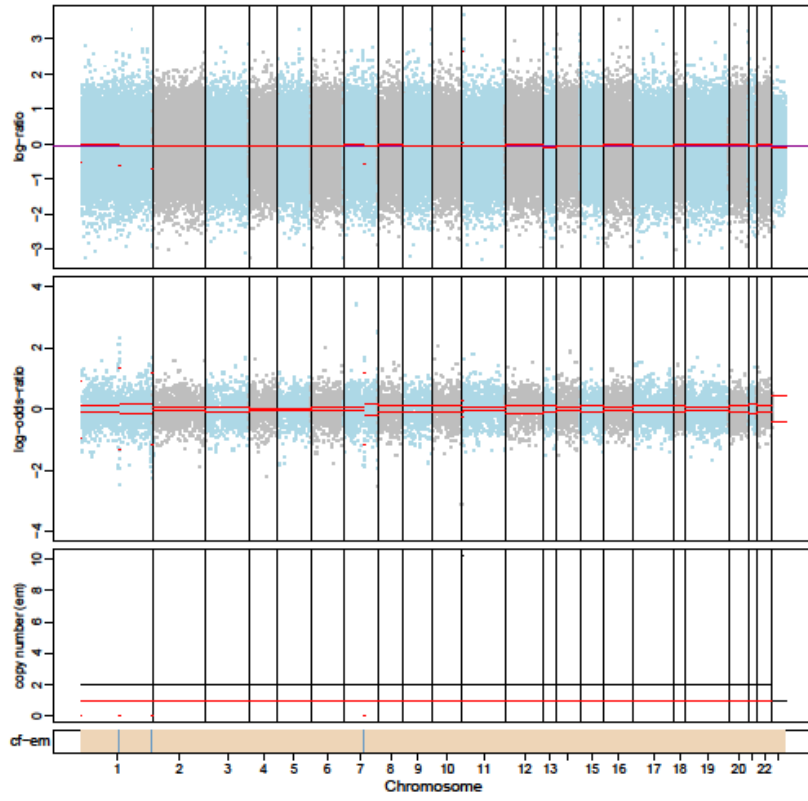

1497-P0

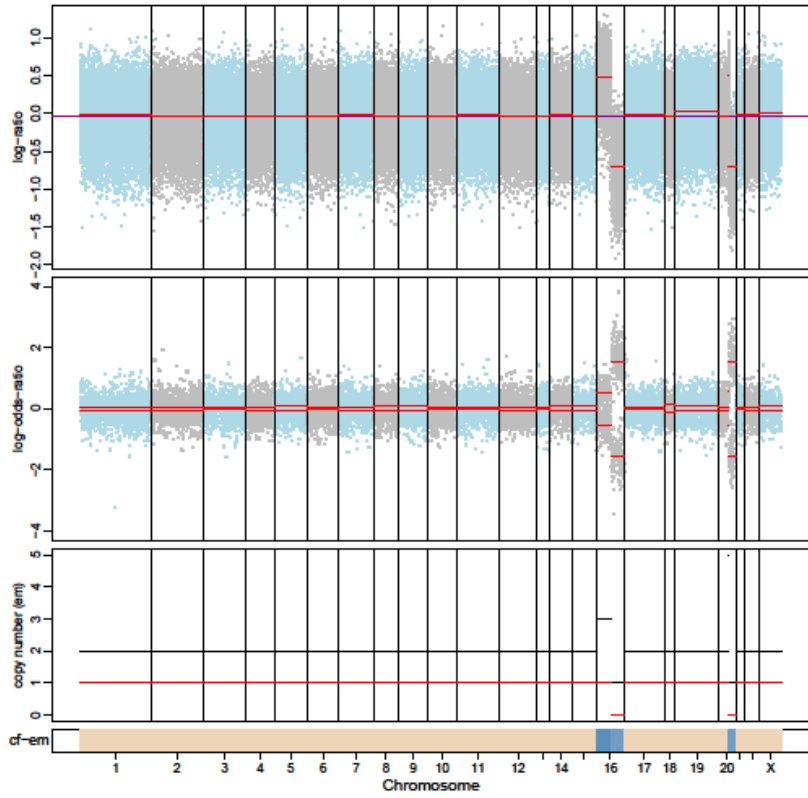

1497-P2

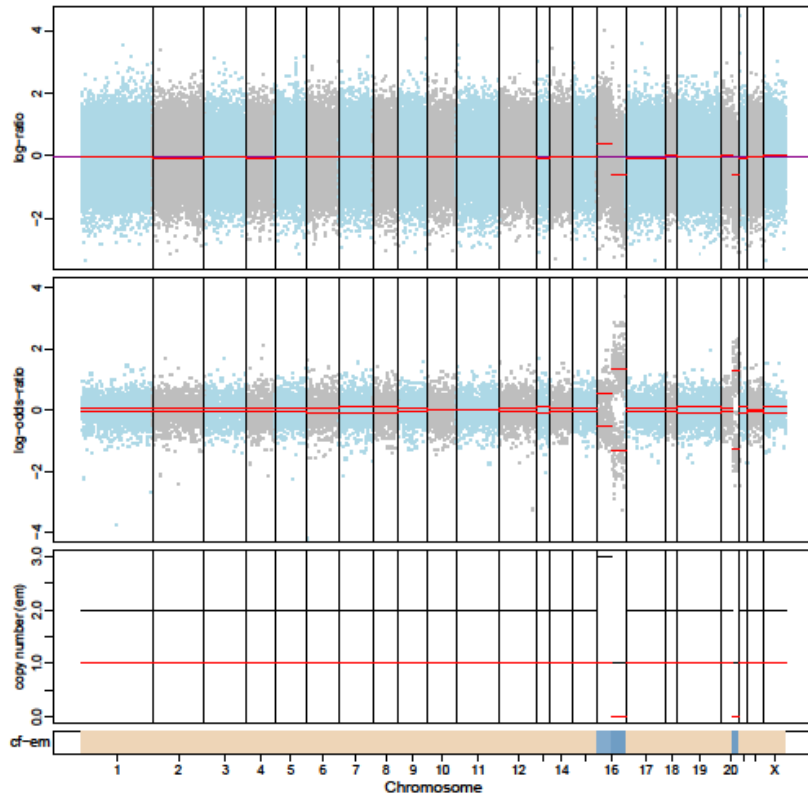

1499-P0

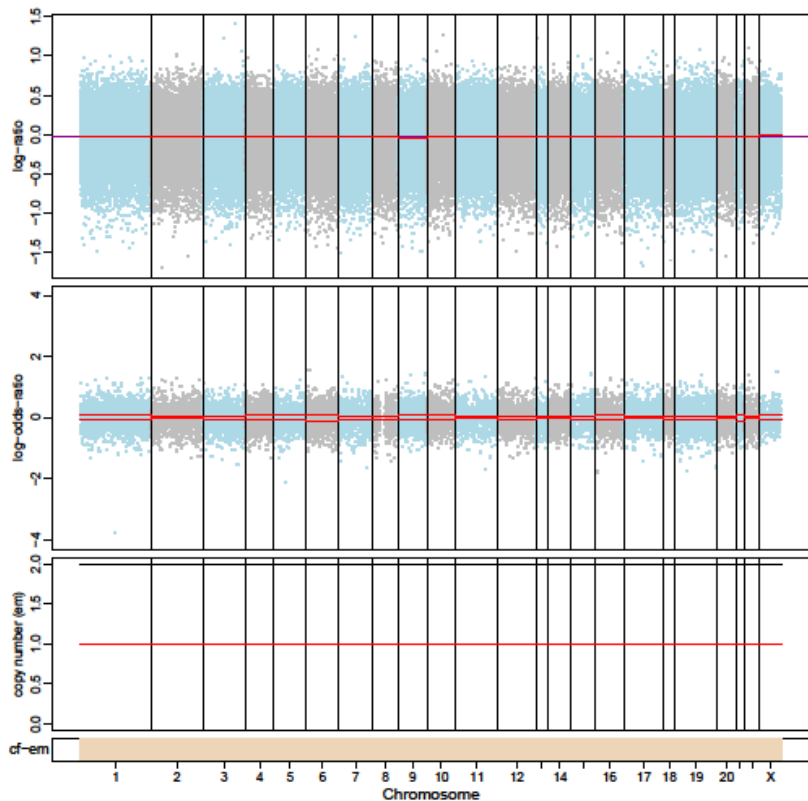

1499-P1

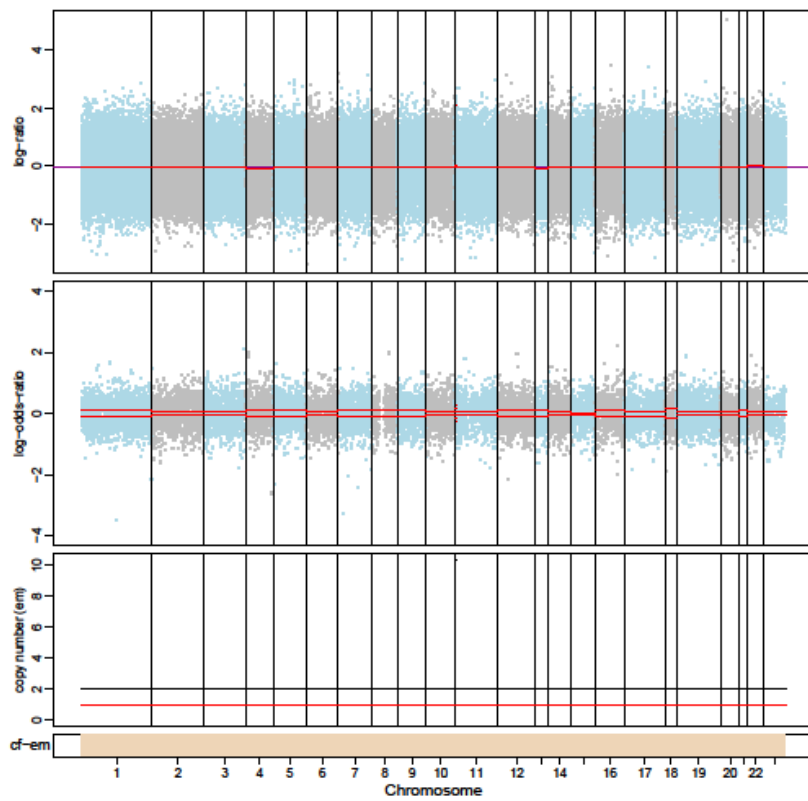

1499-P2

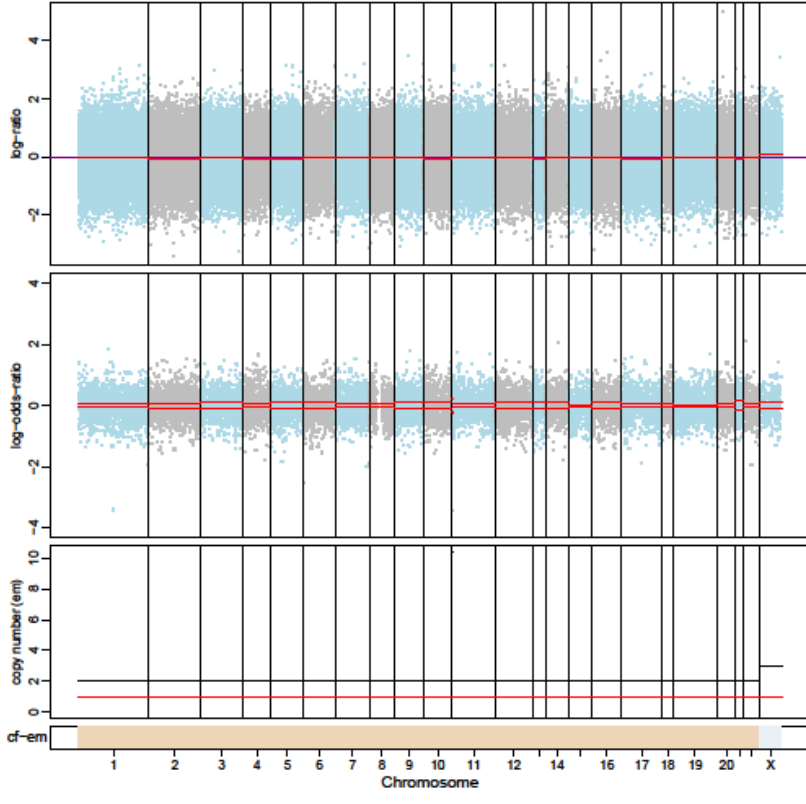

1502-P0

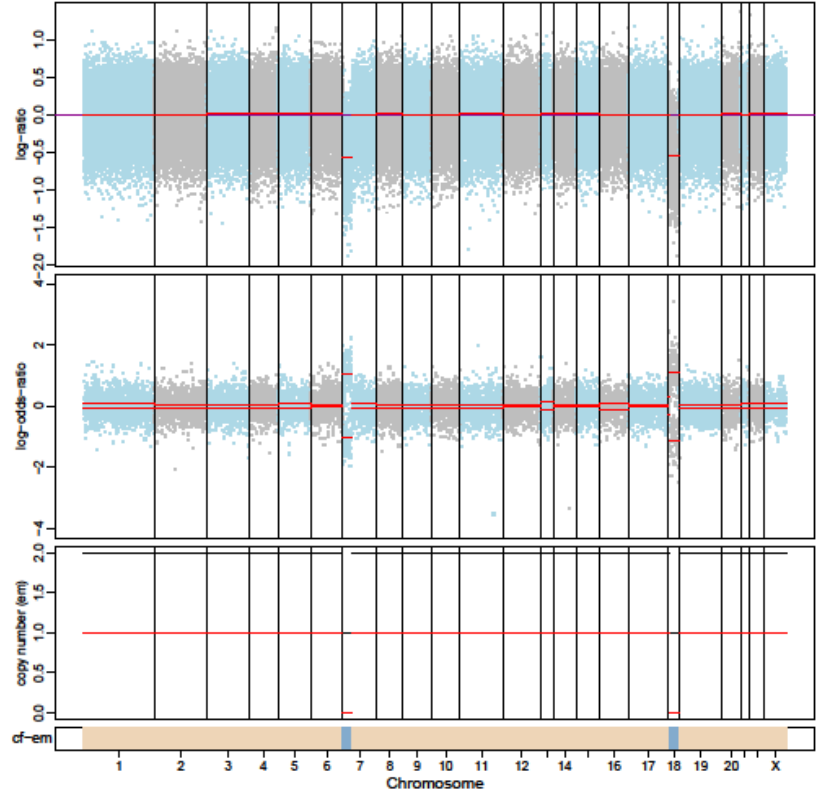

1502-P1

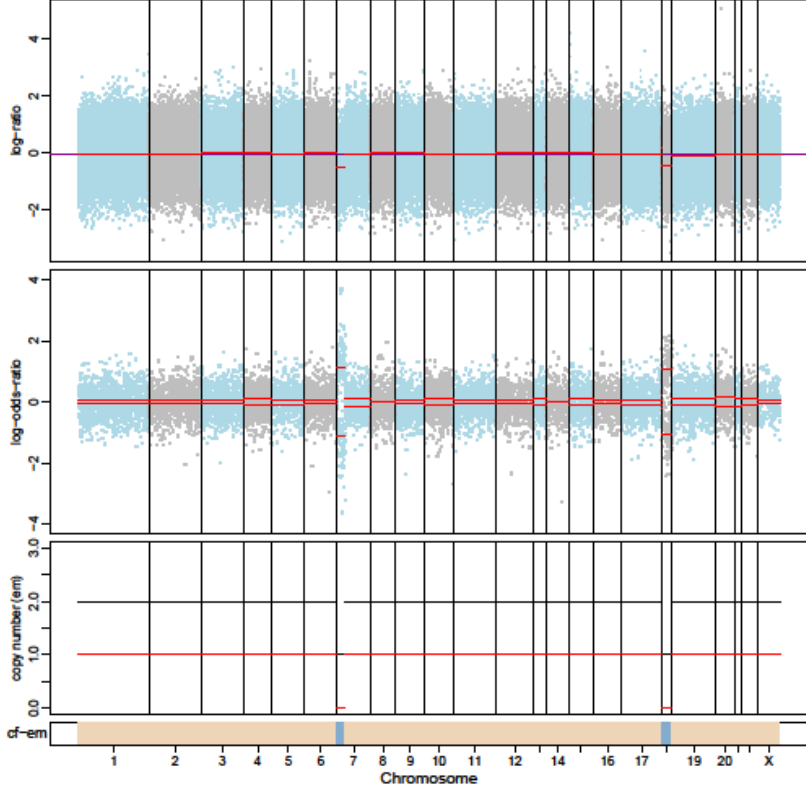

1502-P2

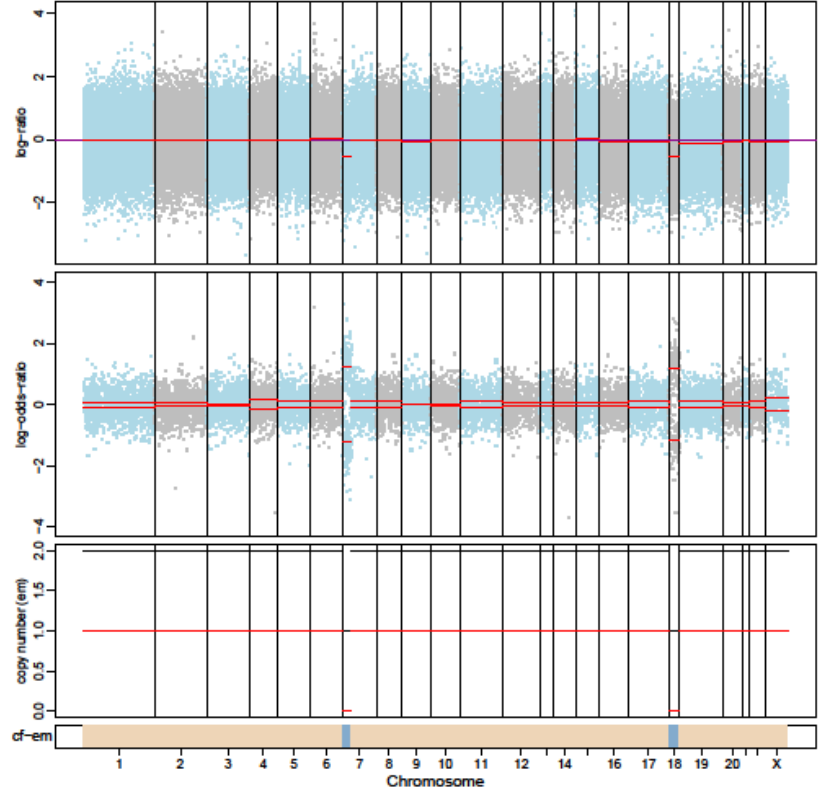

1504-P0

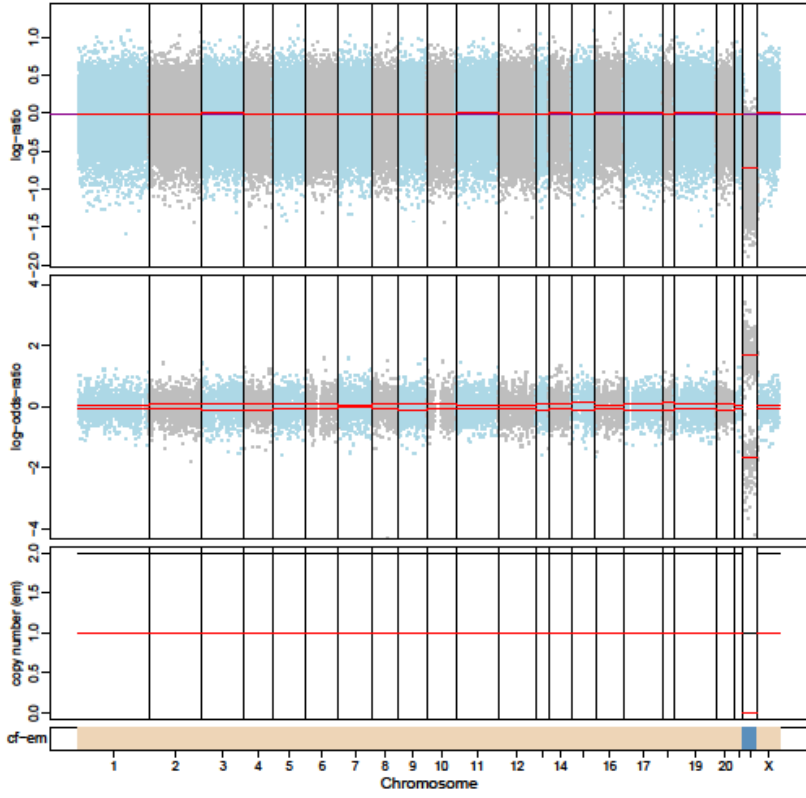

1504-P1

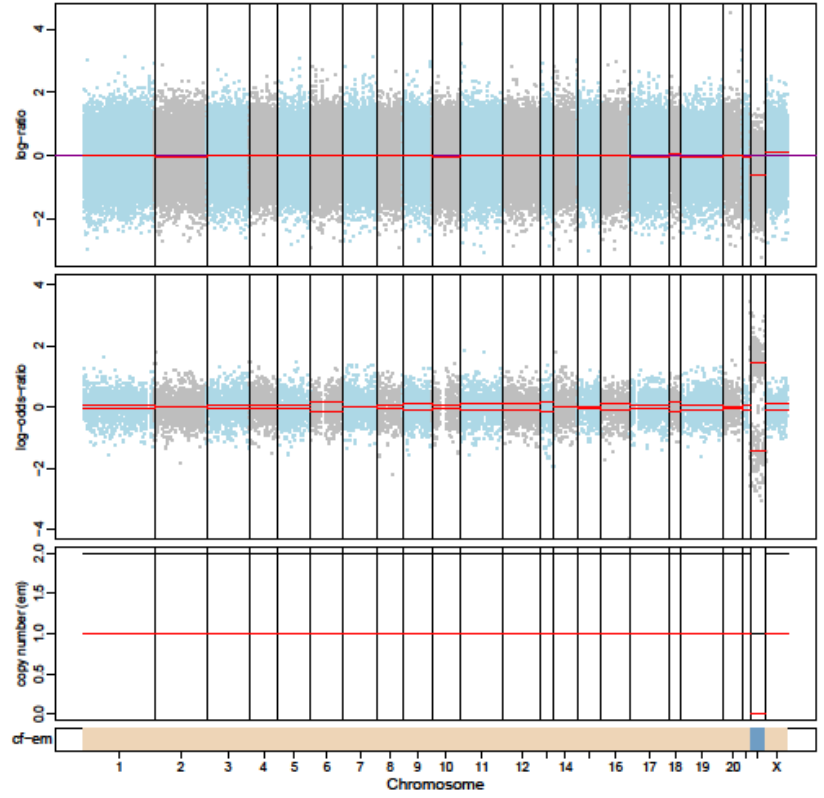

1504-P2

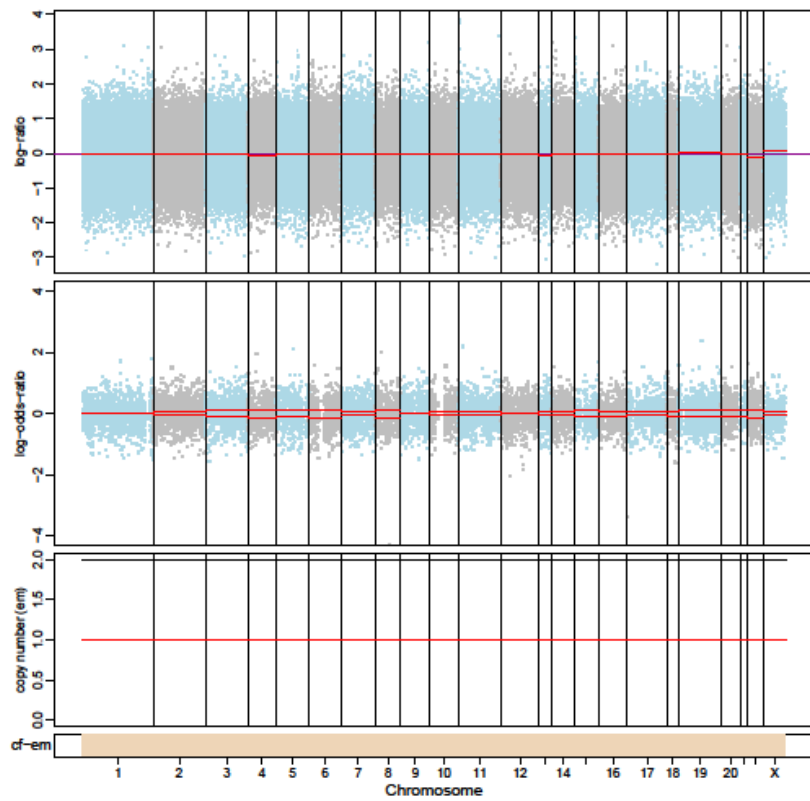

1508-P0

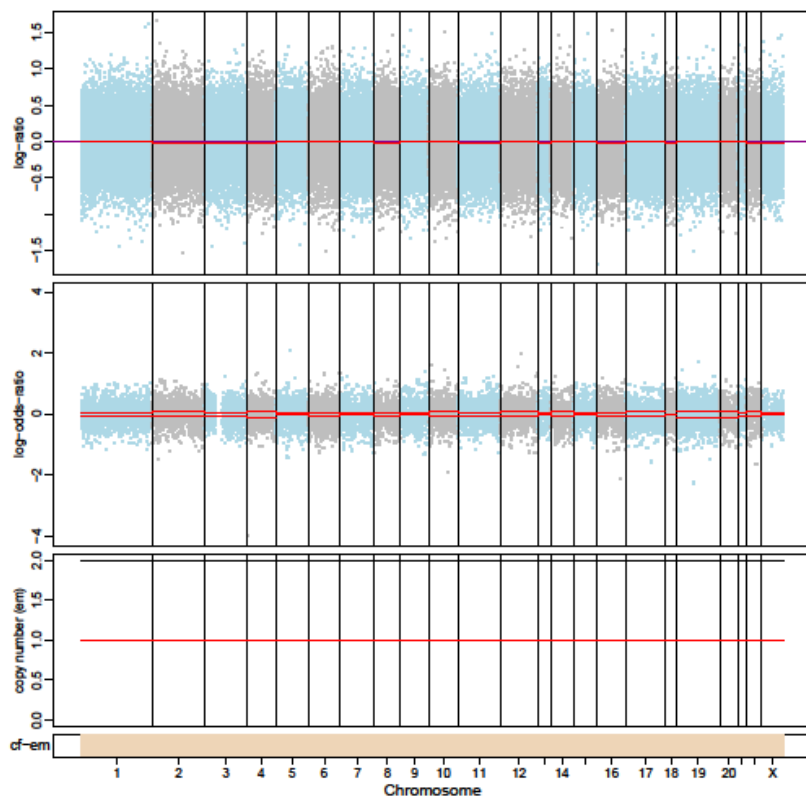

1508-P1

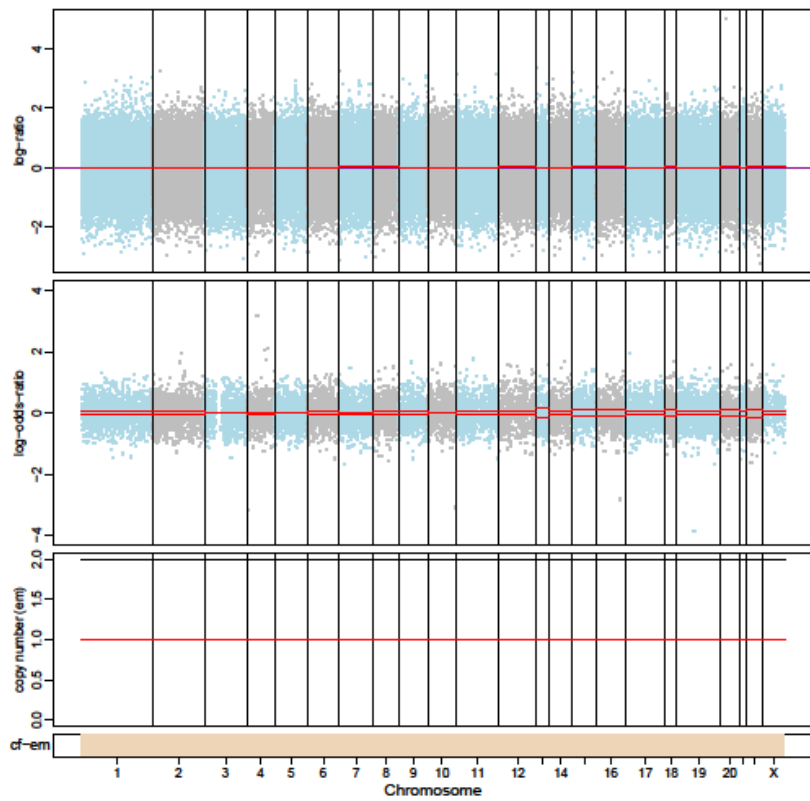

1508-P2

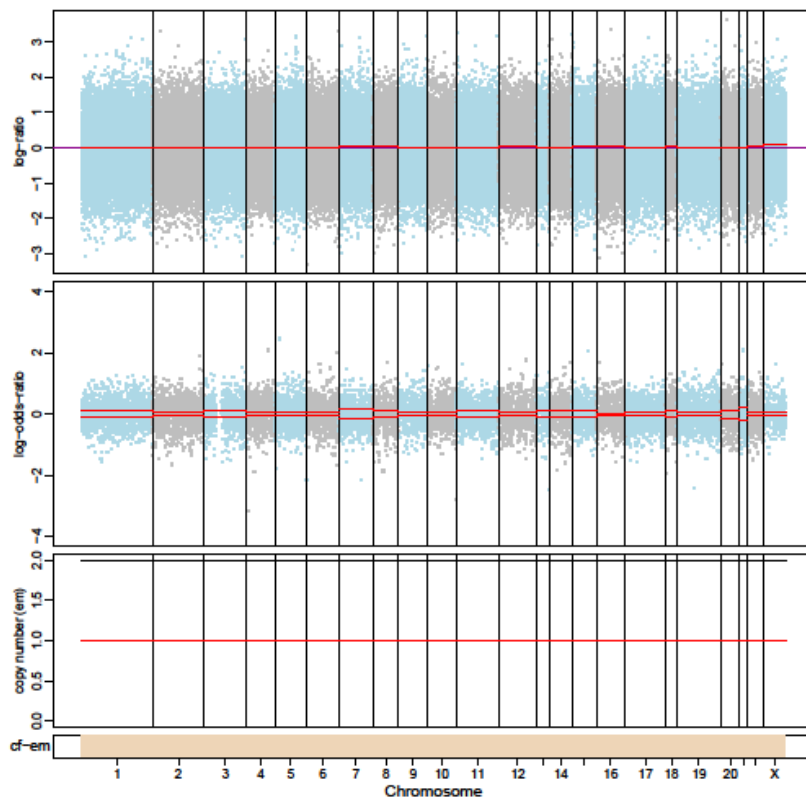

1510-P0

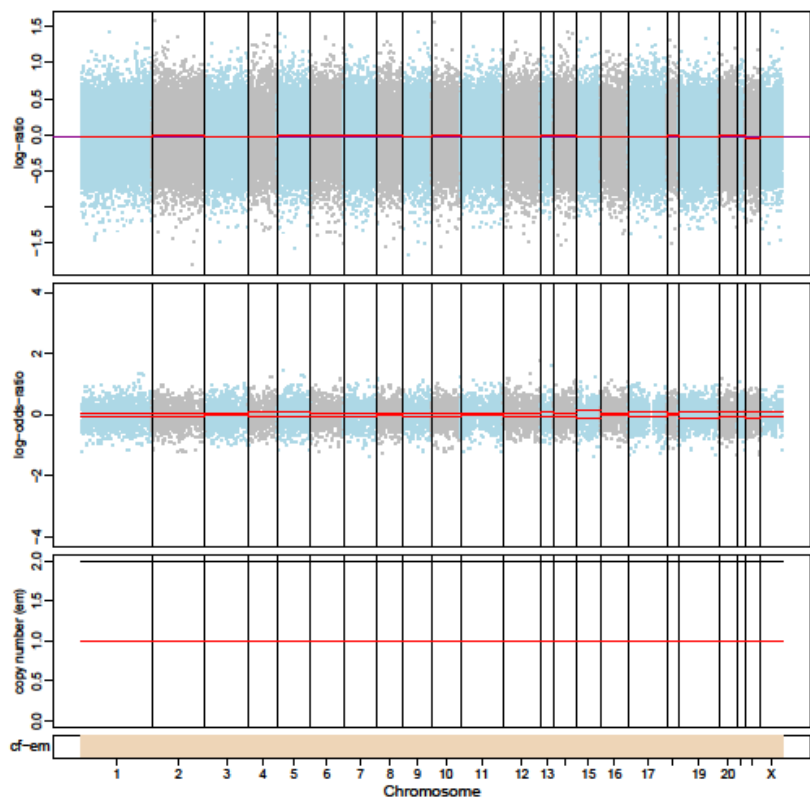

1510-P1

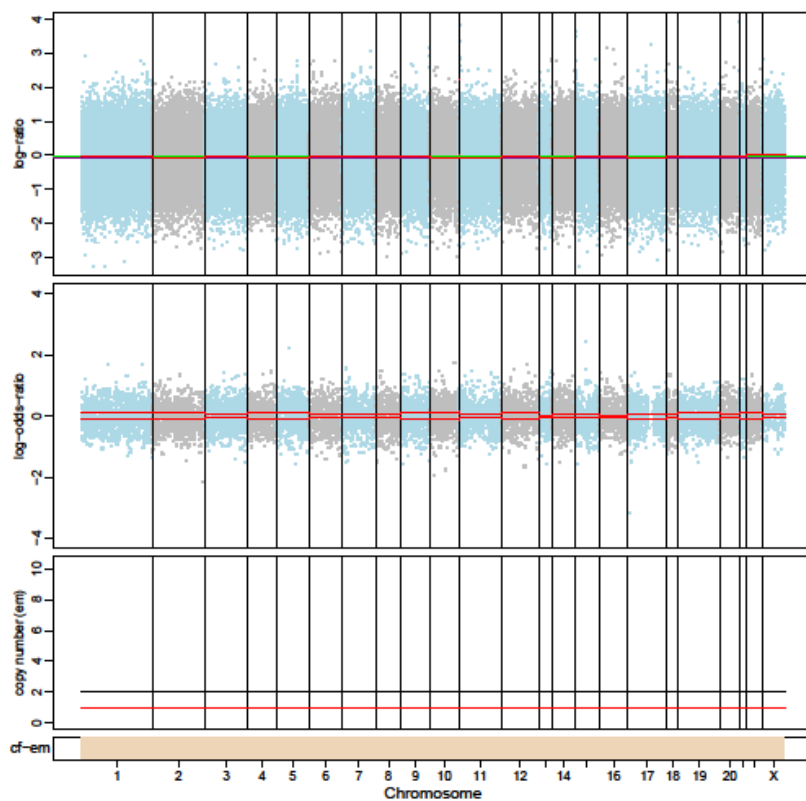



1510-P2

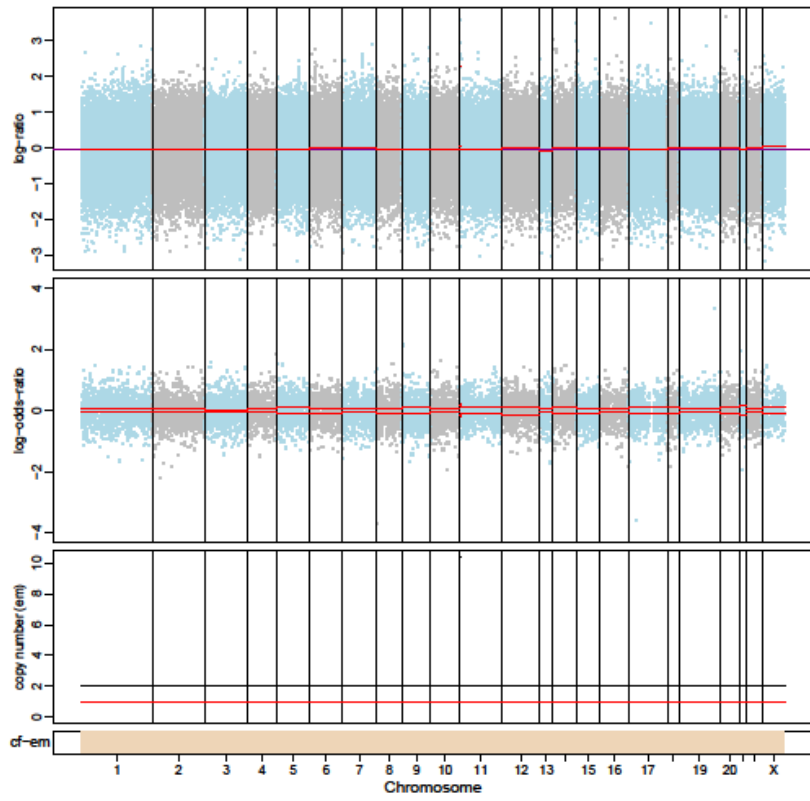

1526-P1

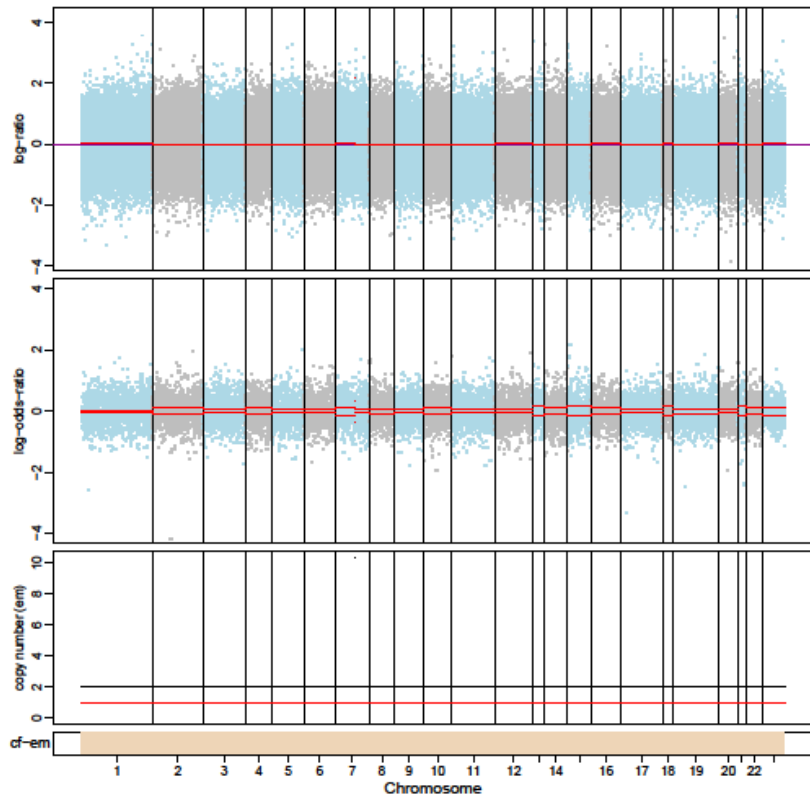

1537-P0

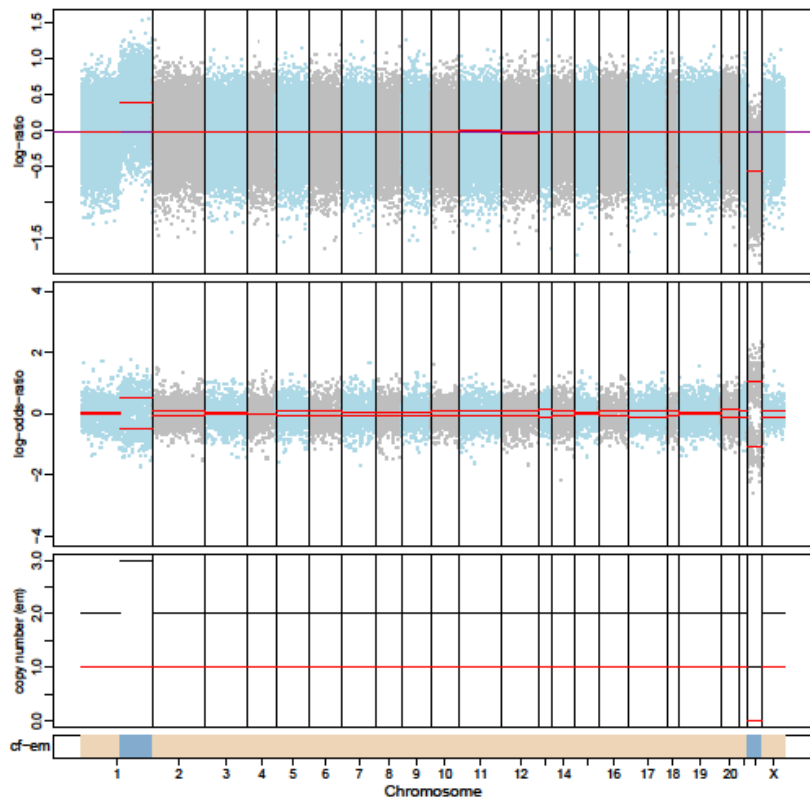

1526-P0

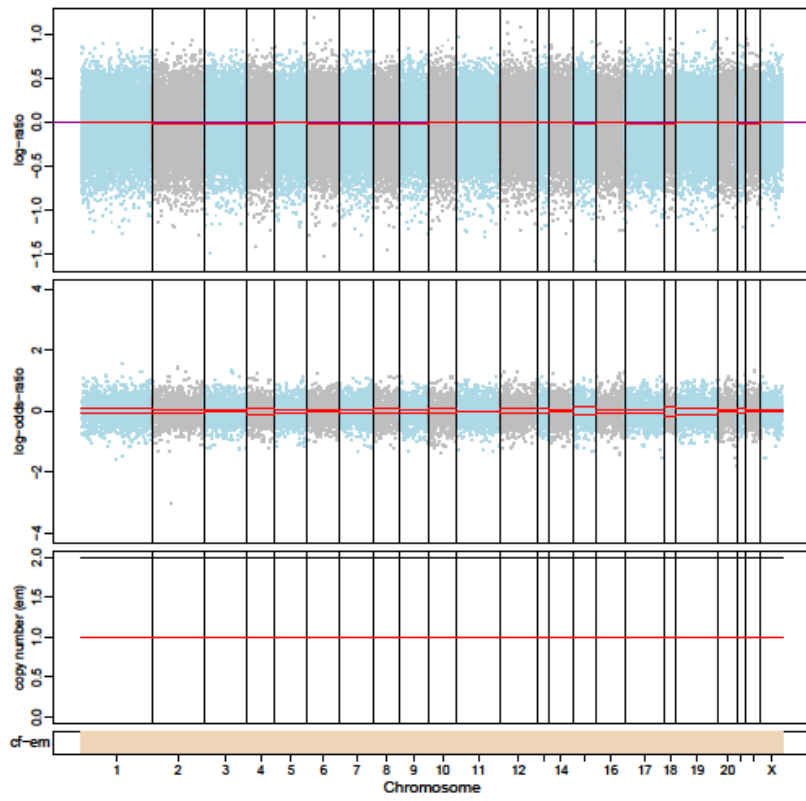

1526-P2

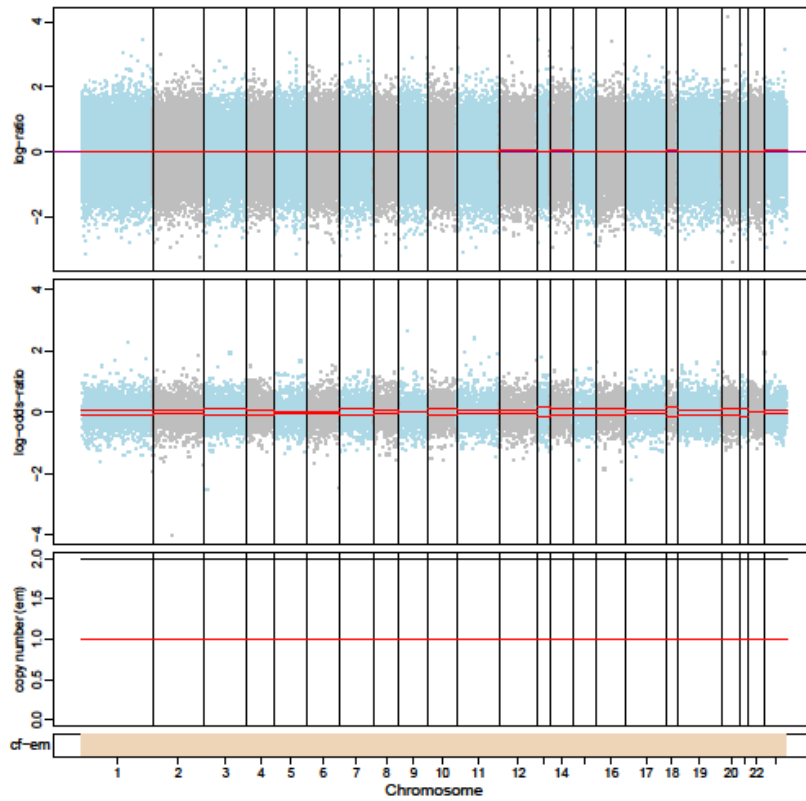

1537-P1

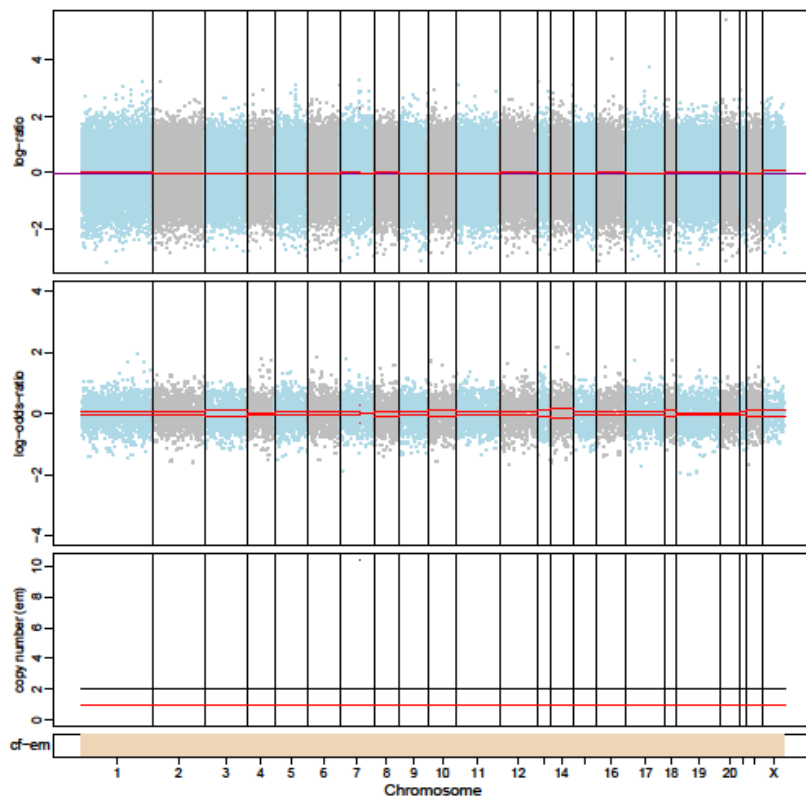

1537-P2

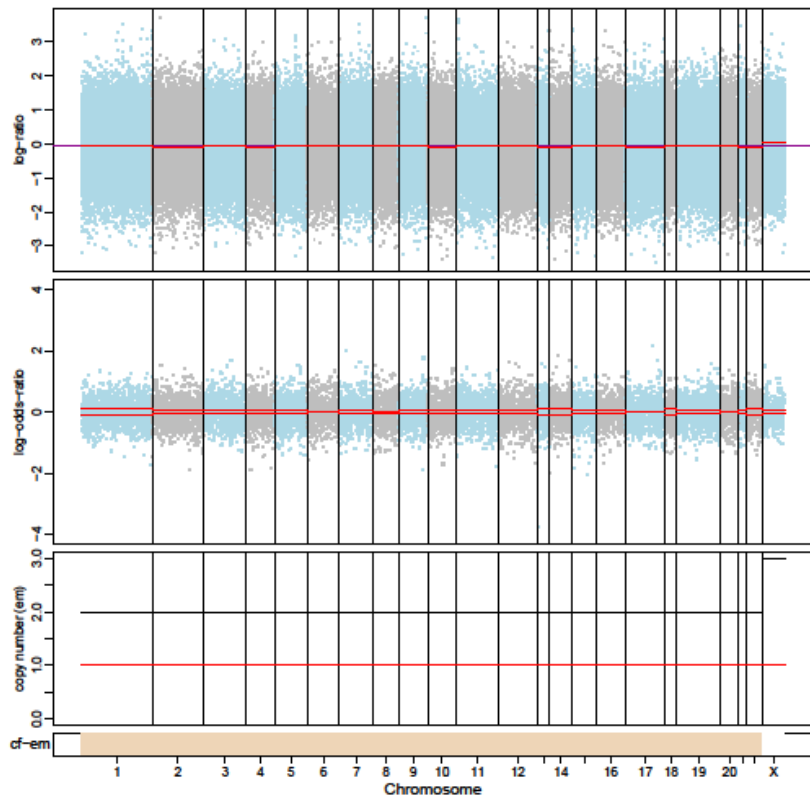

1542-P0

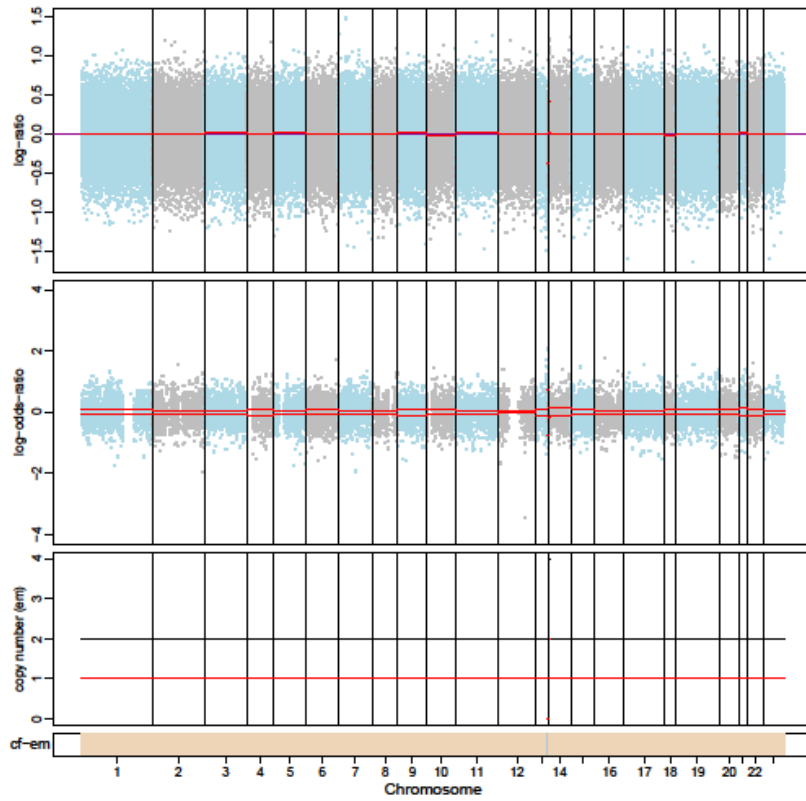

1542-P1

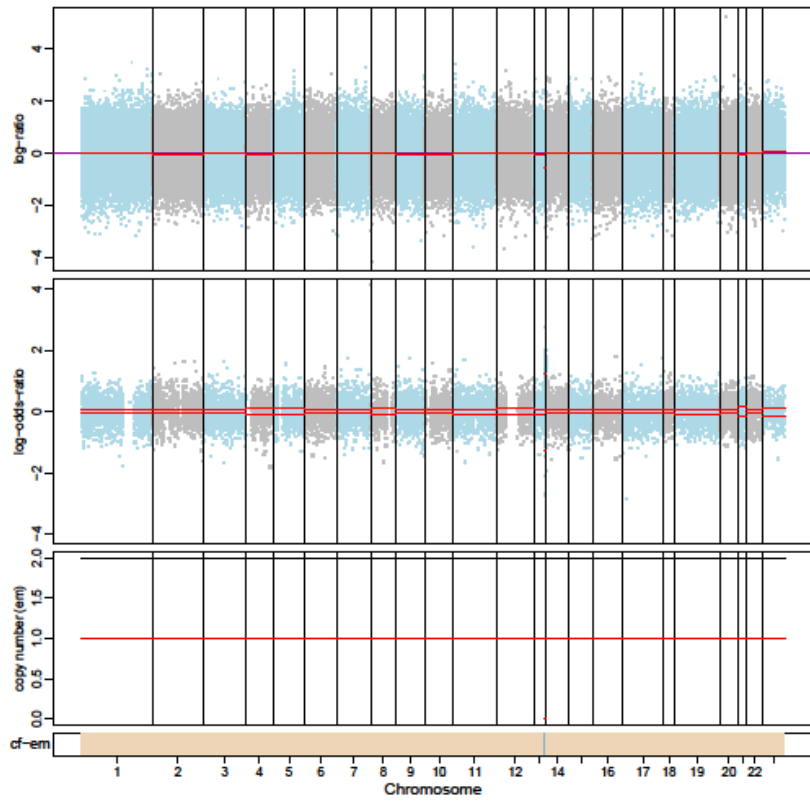

1542-P2

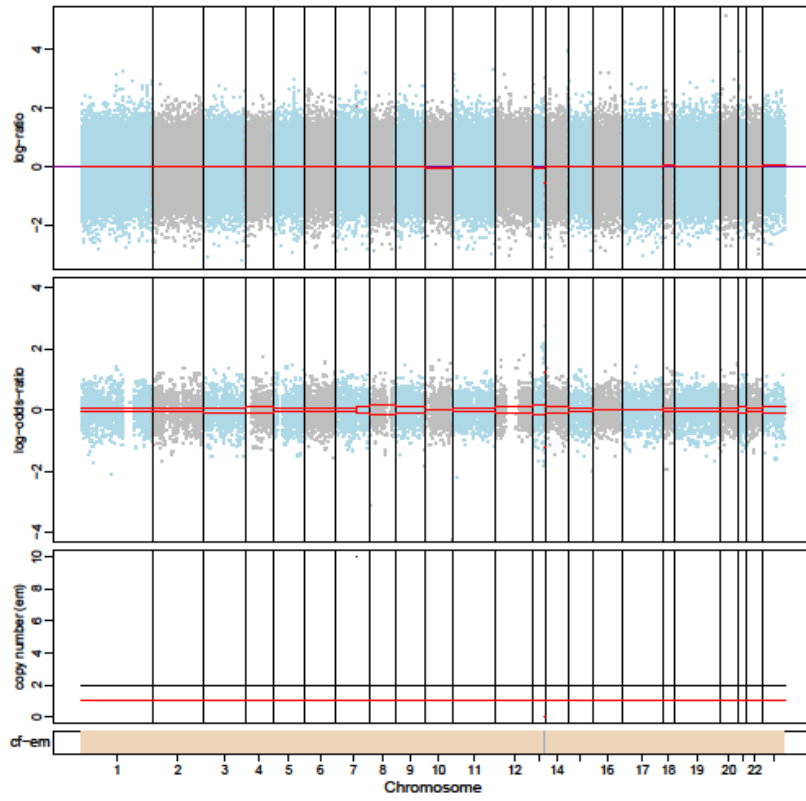

1544-P0

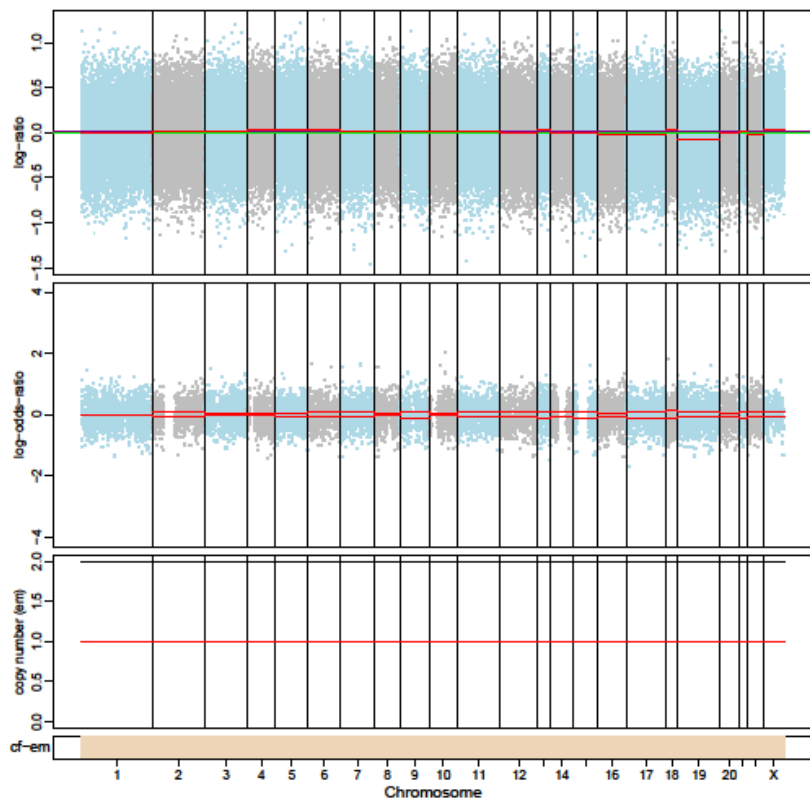

1544-P1

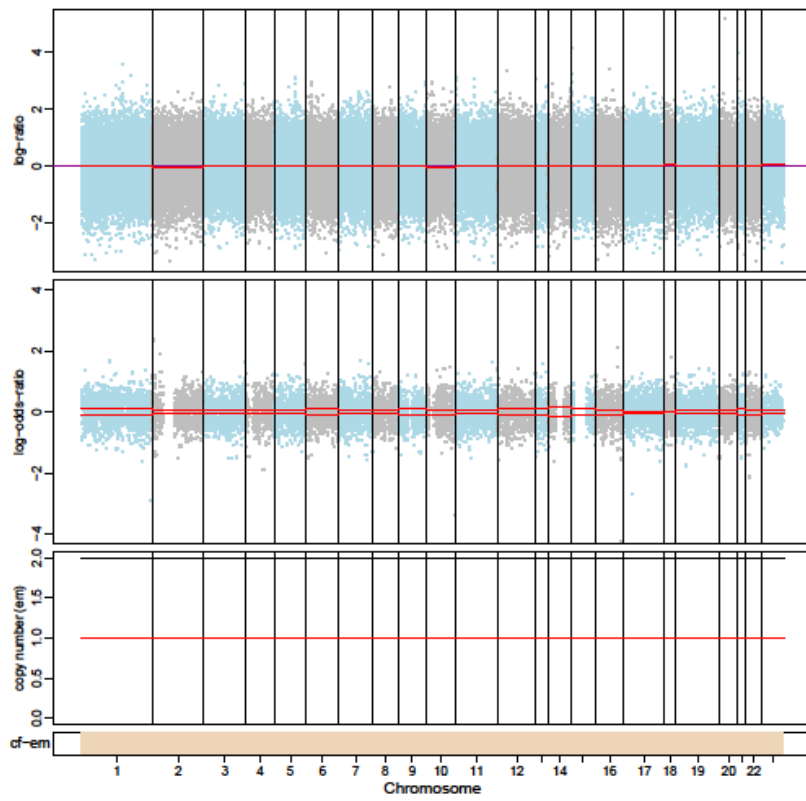

1544-P2

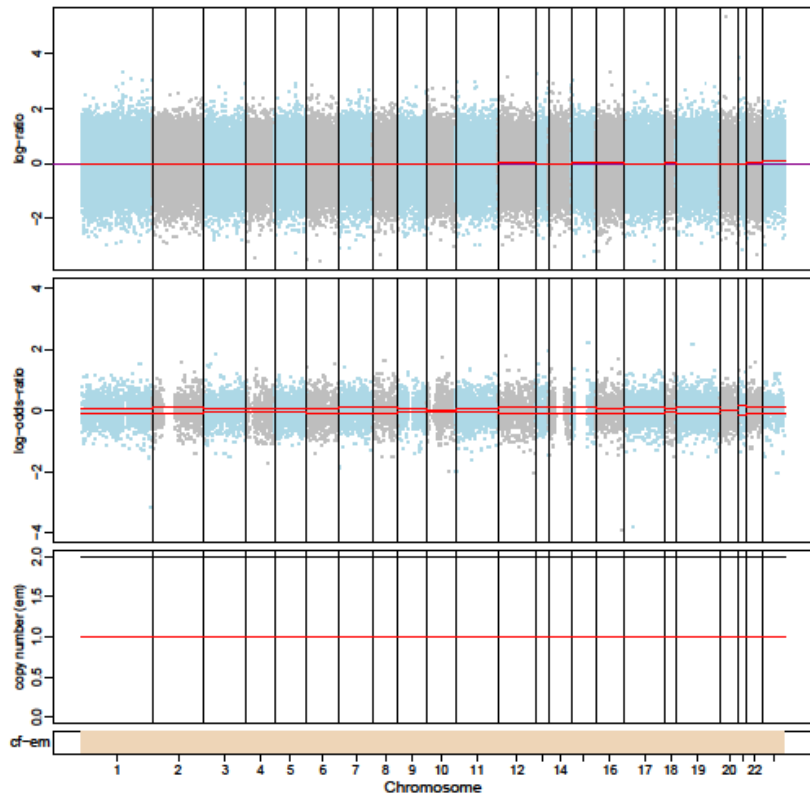

1560-P0

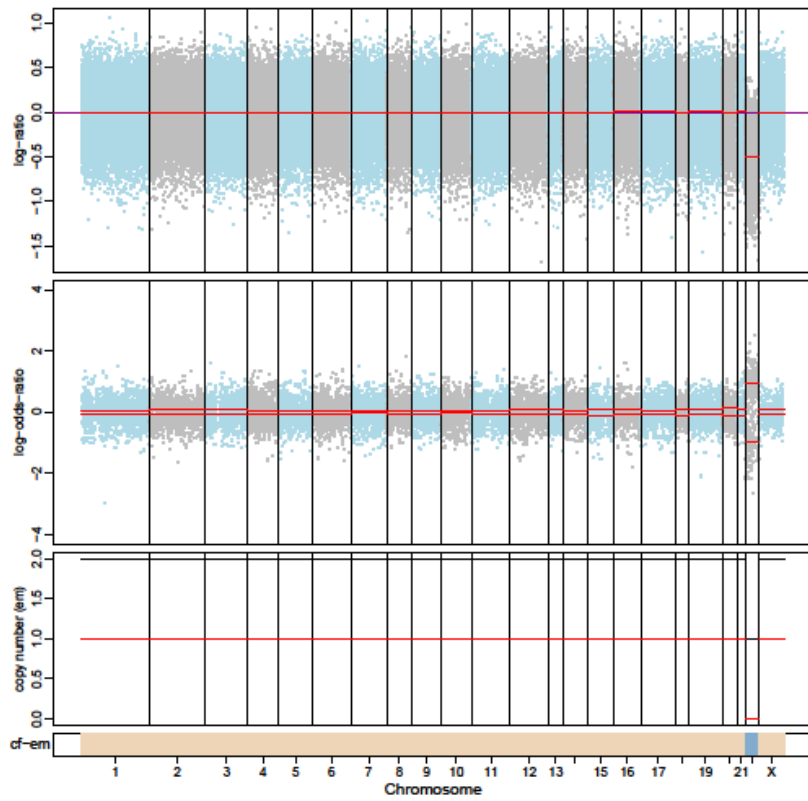

1560-P1

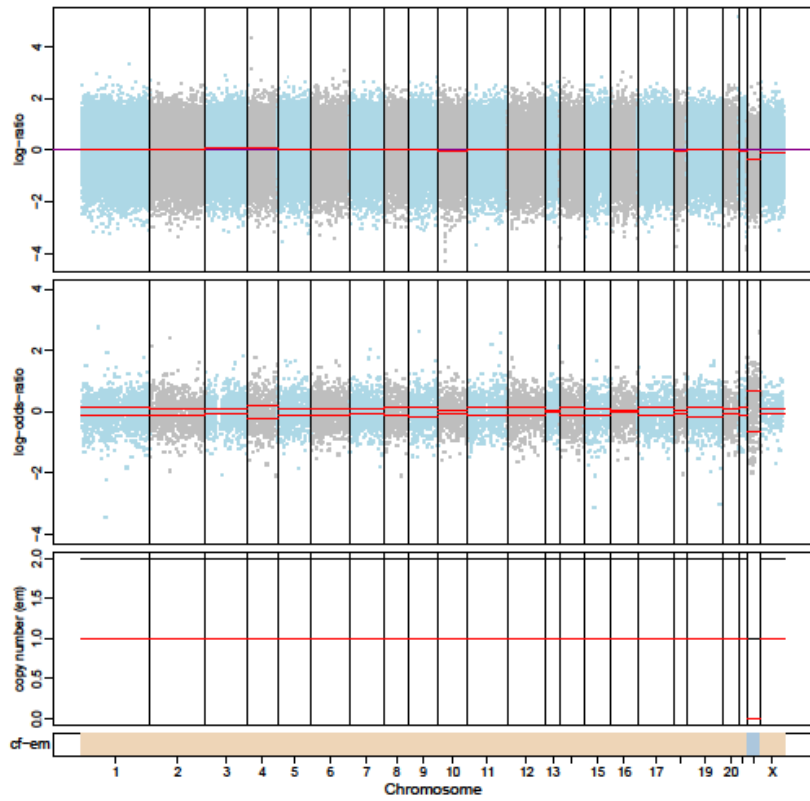

1560-P2

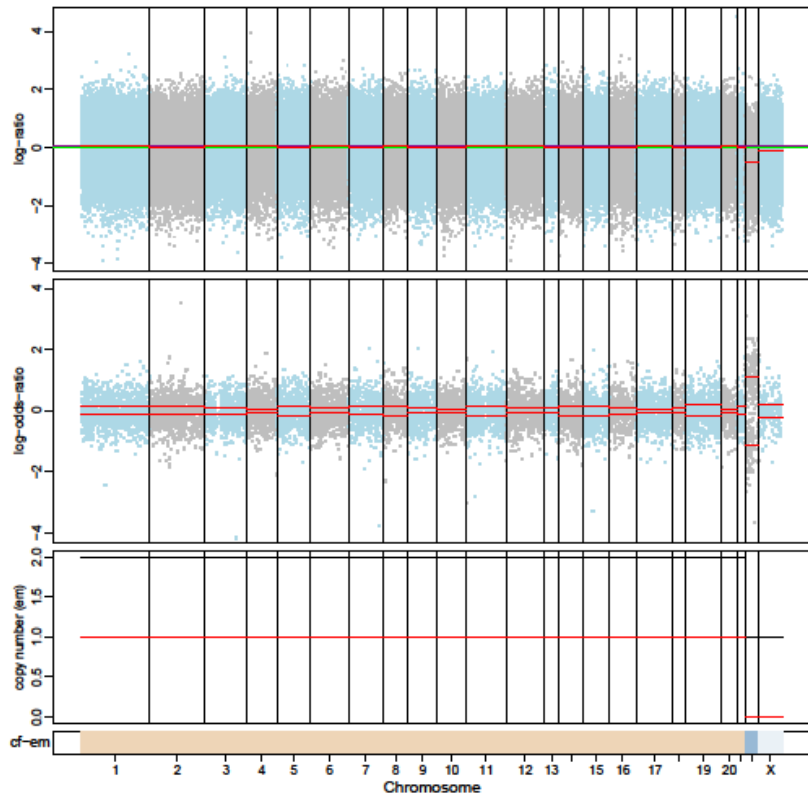

1565-P0

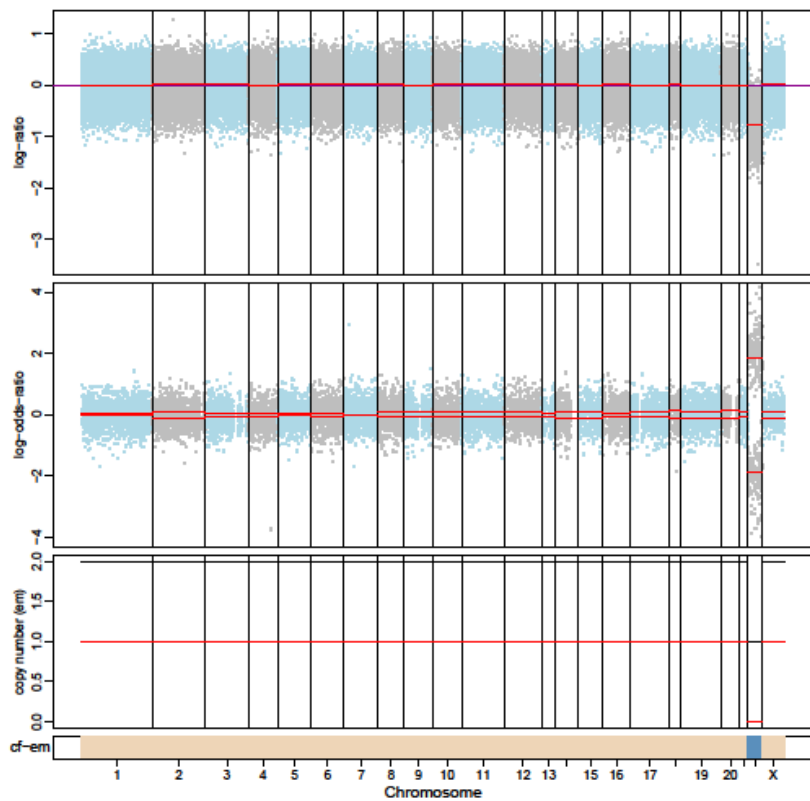

1565-P1

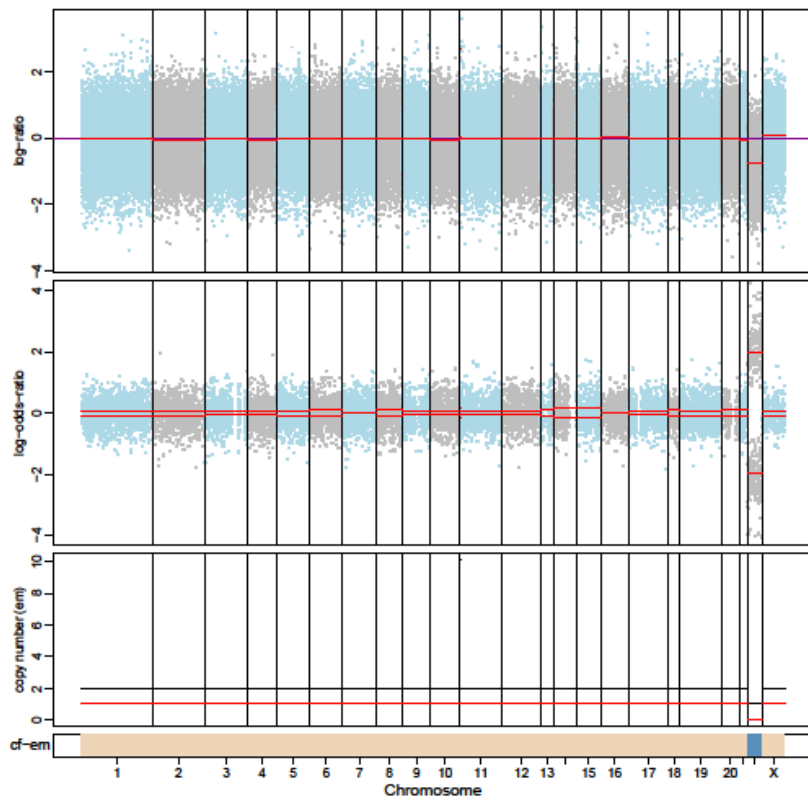

1565-P2

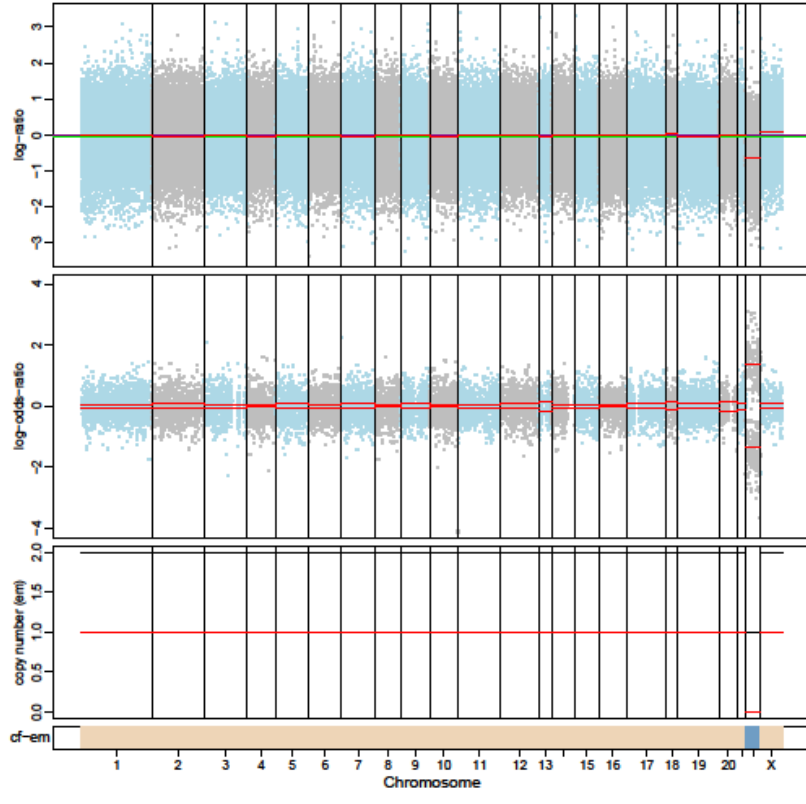

1575-P0

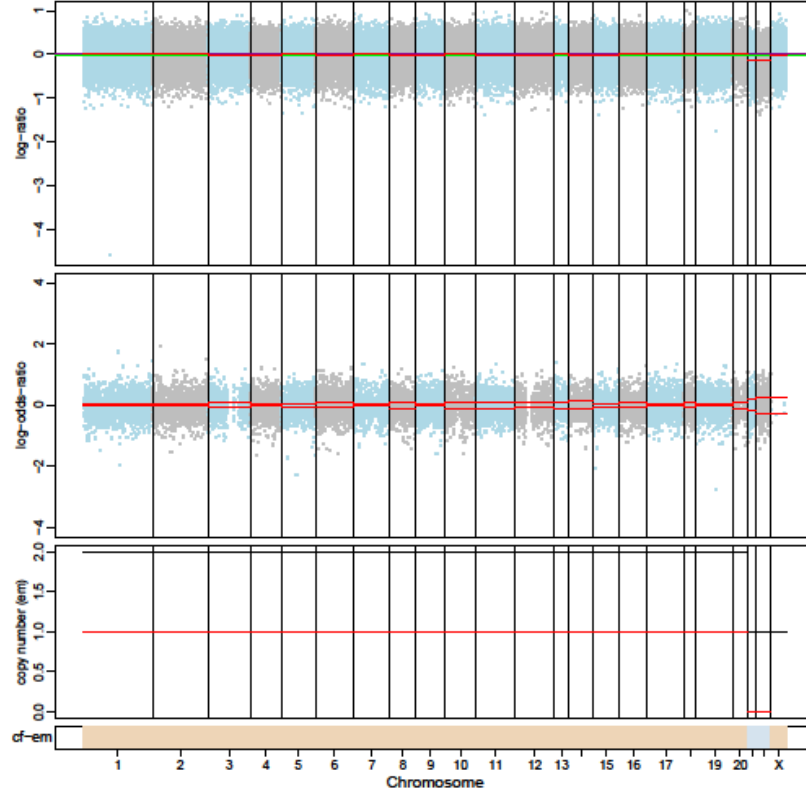

1575-P1

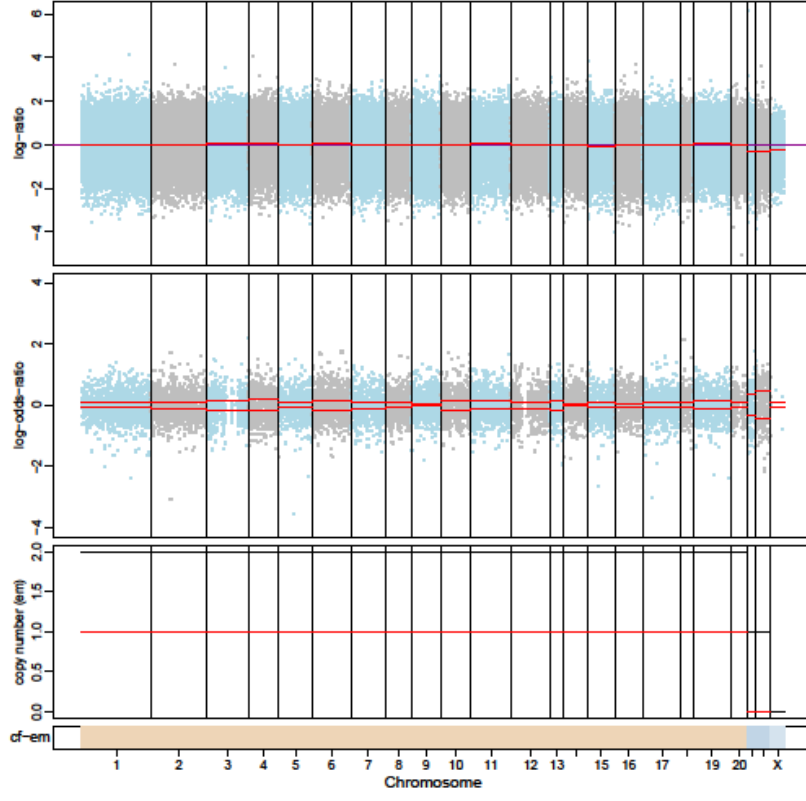

1575-P2

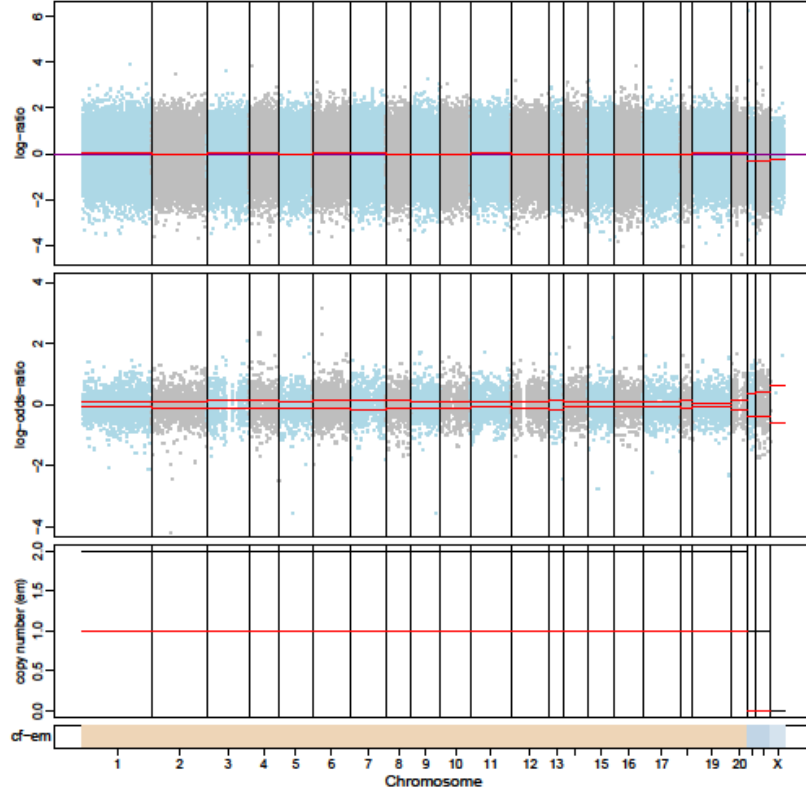

1182-P2

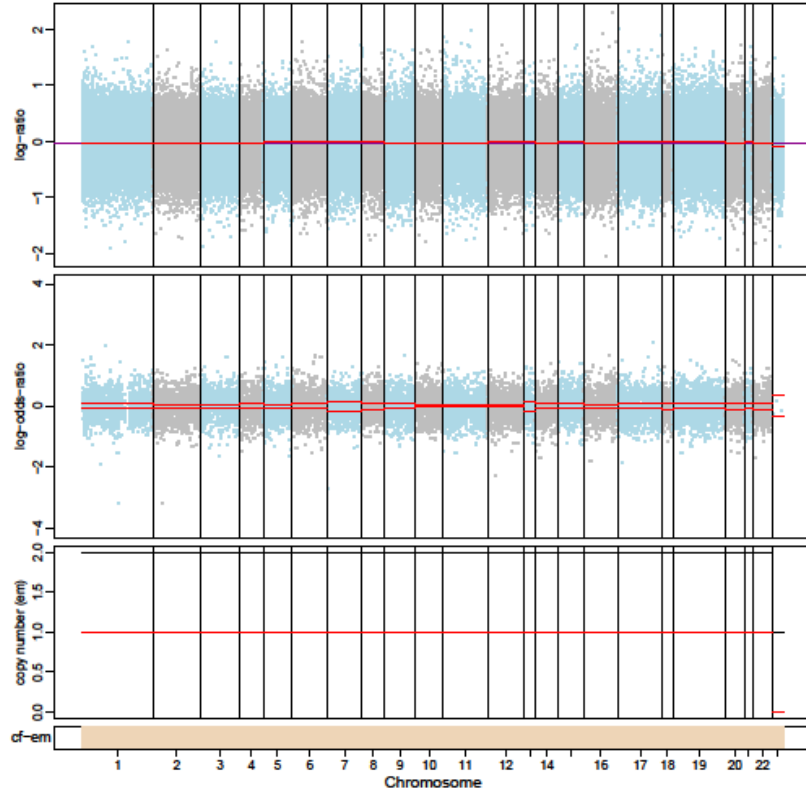

1168-P2

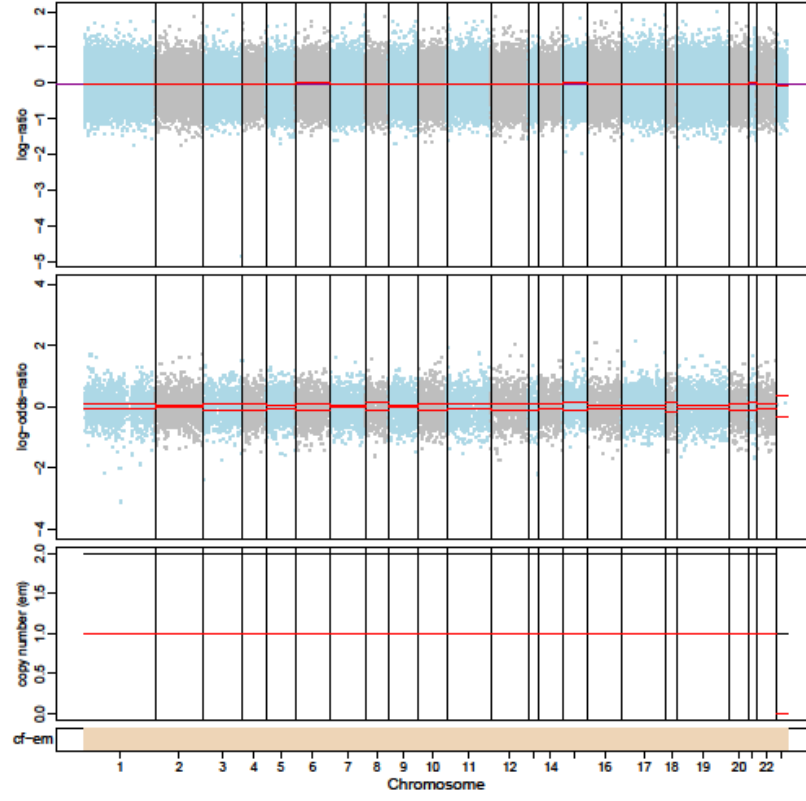

**Figure S1: Copy number plots.** Raw copy number plots using Facets. The top panel in each case is the total copy number log-ratio (logR), and the second panel is allele-specific log-odds-ratio data (logOR) with chromosomes in blue and gray color. Third panel is the plot of corresponding integer (total, minor) copy number changes.

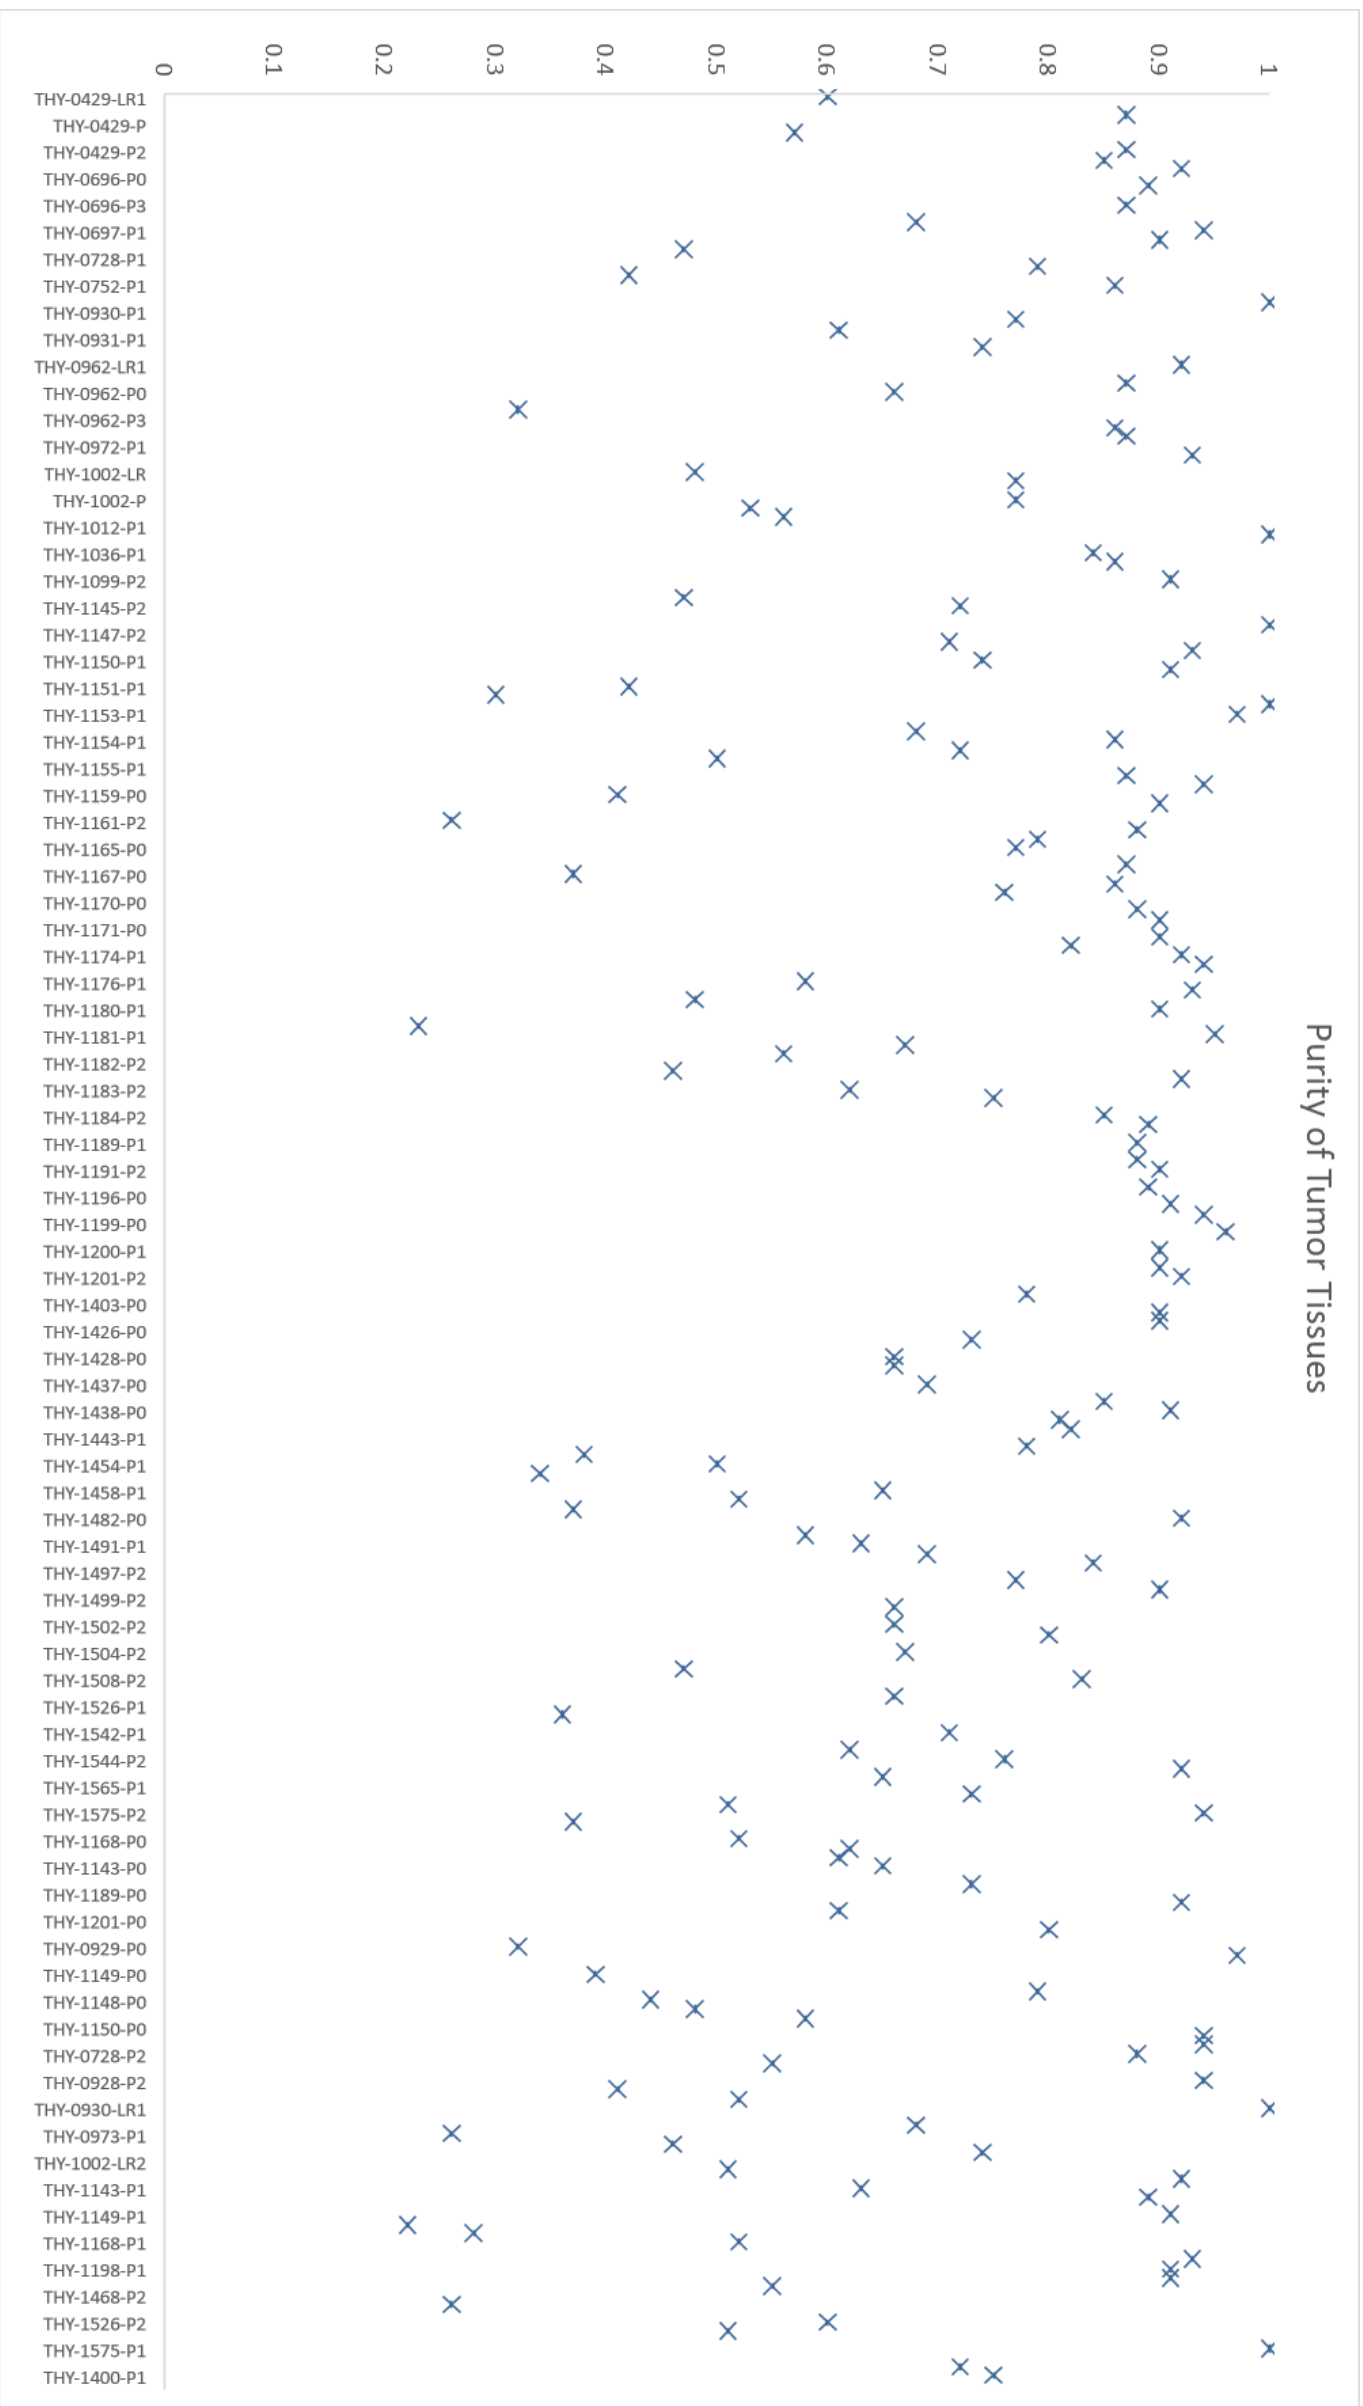

**Figure S2: Purity estimation in PTC cohort. Purity estimation of each cancer tissue.**

# A Relapse cases

429

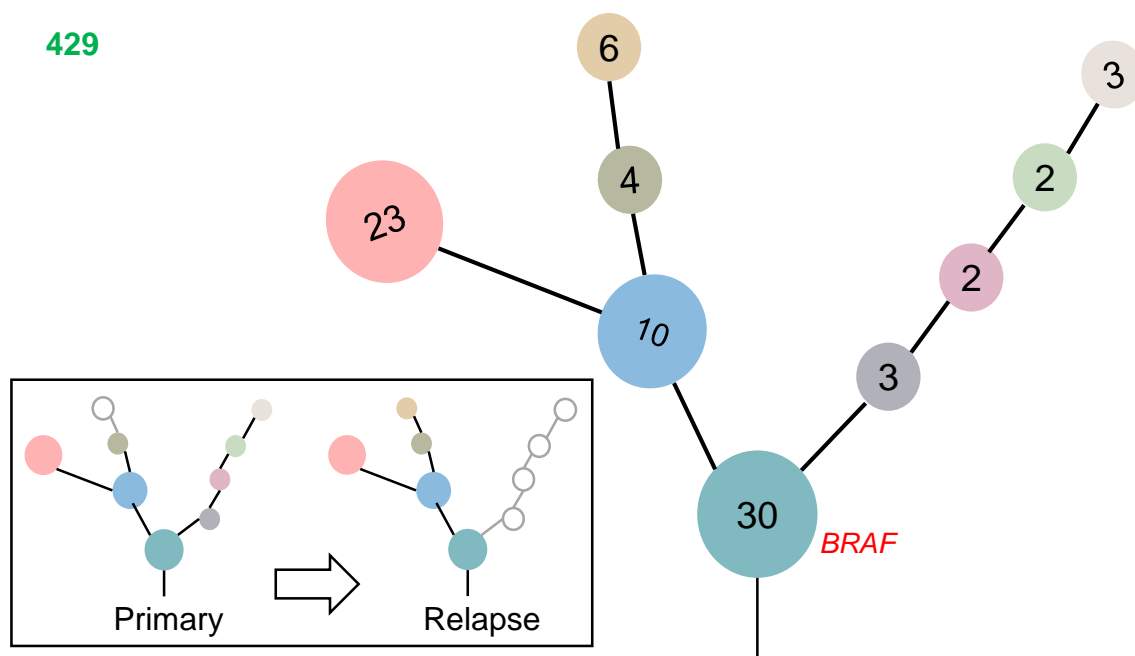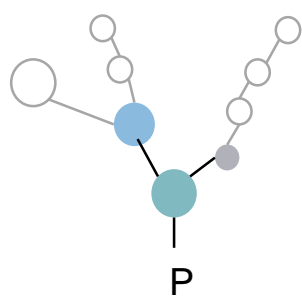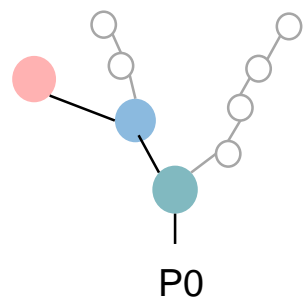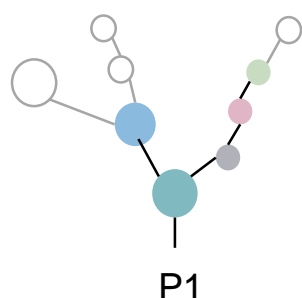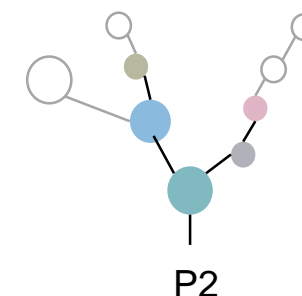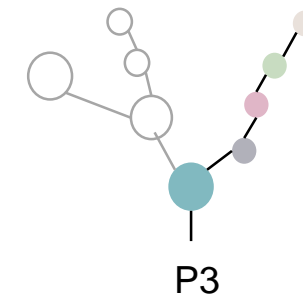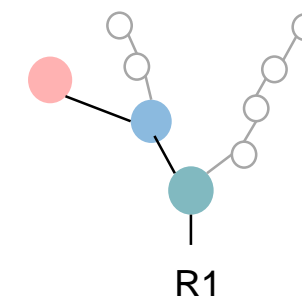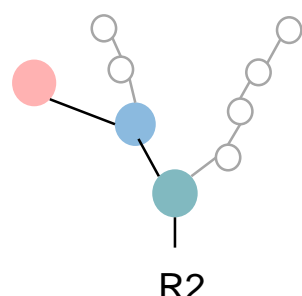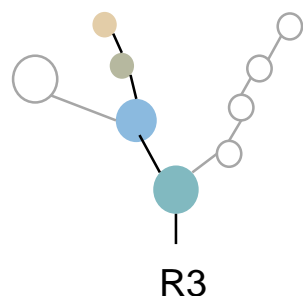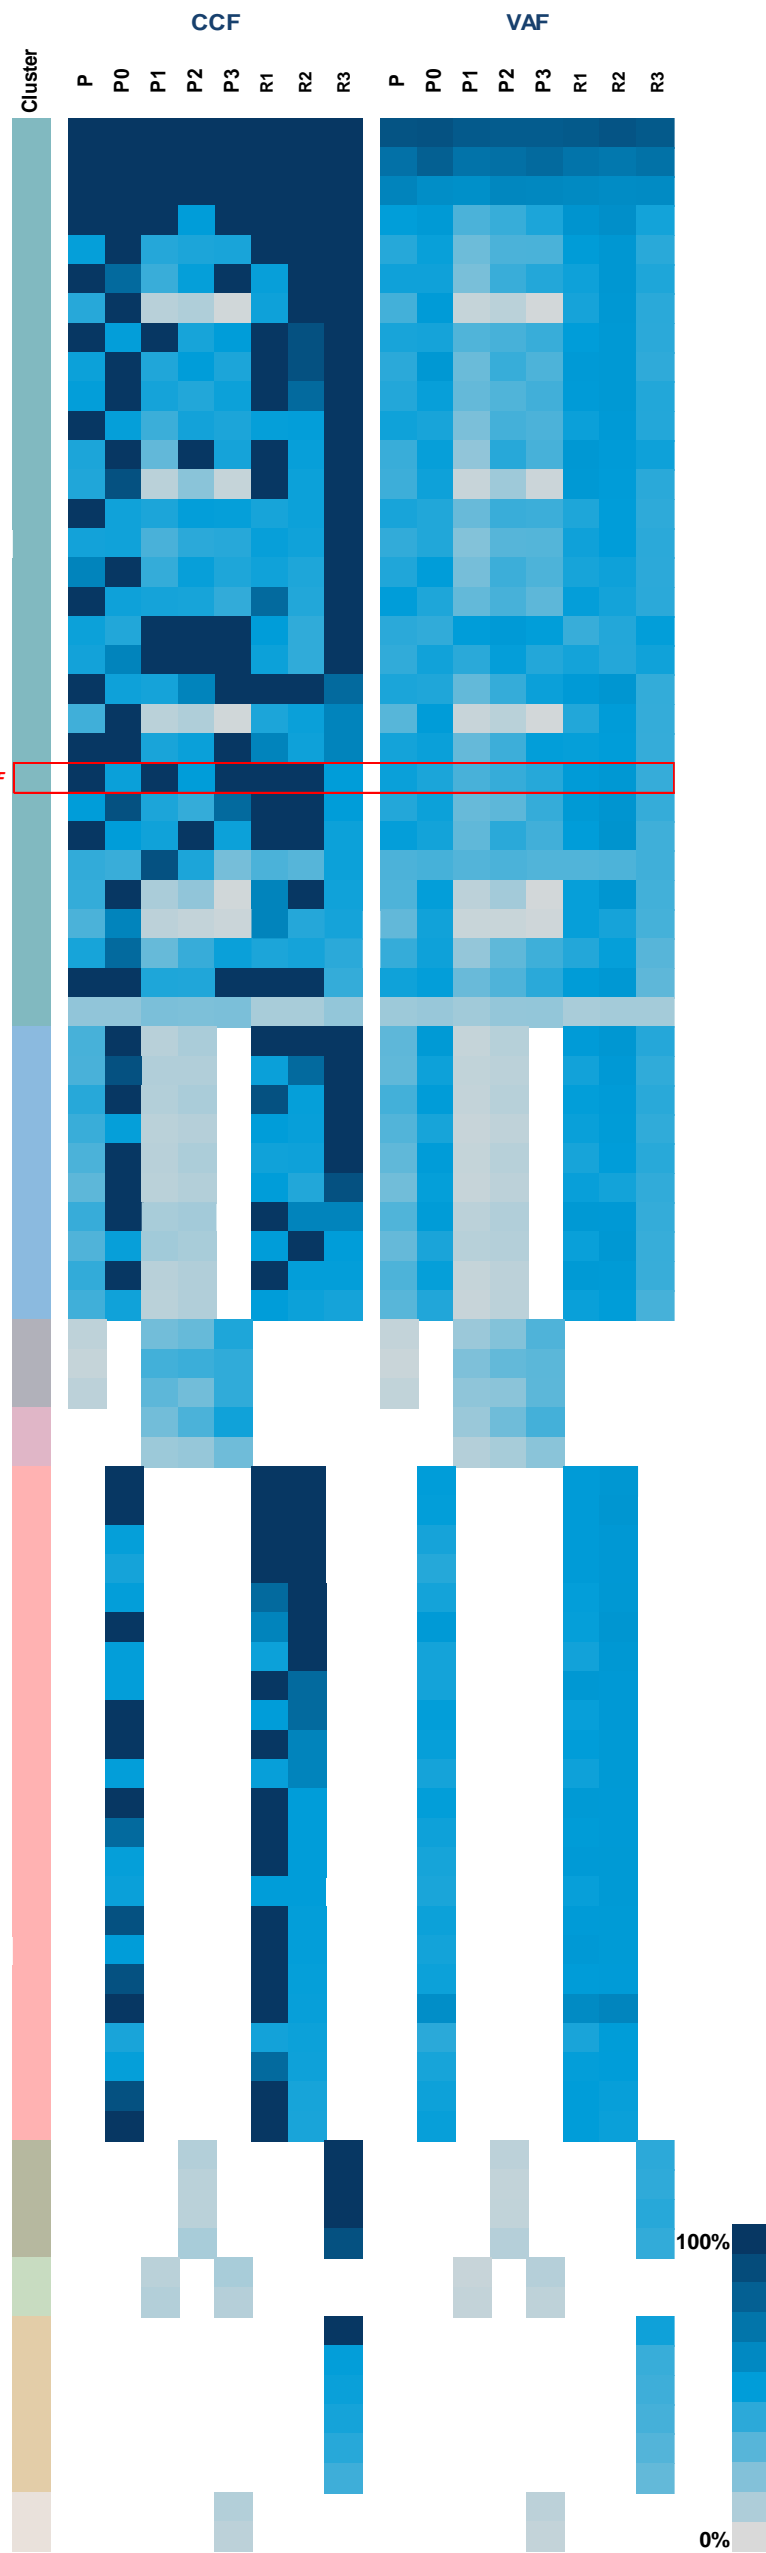

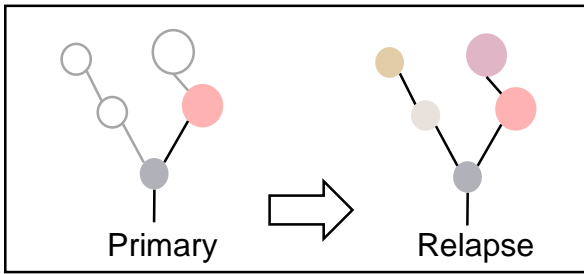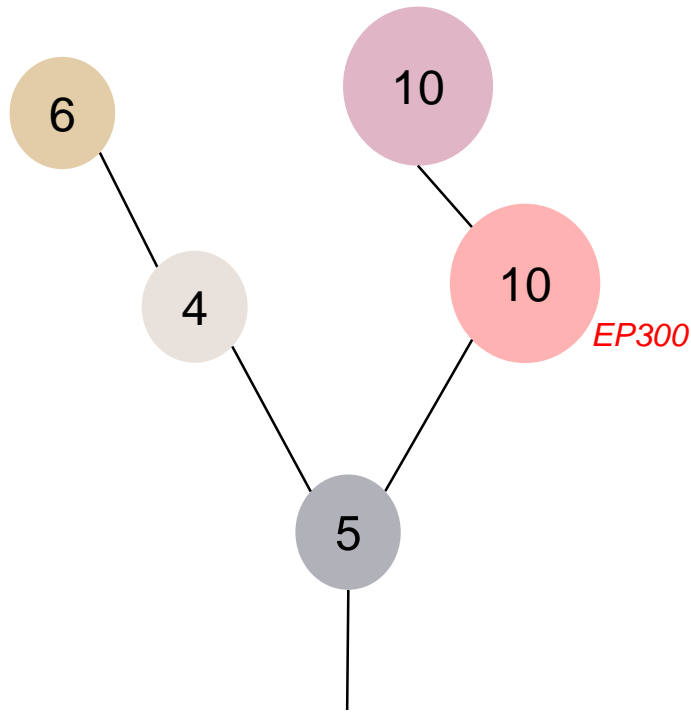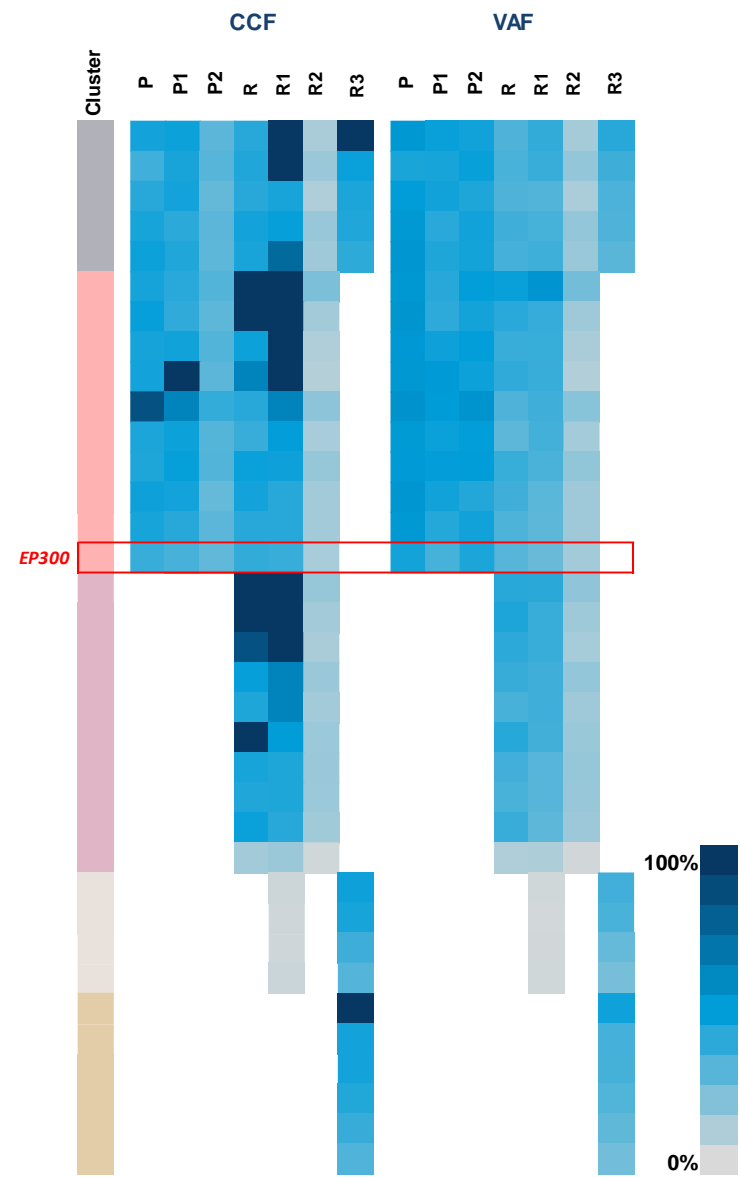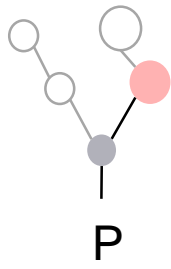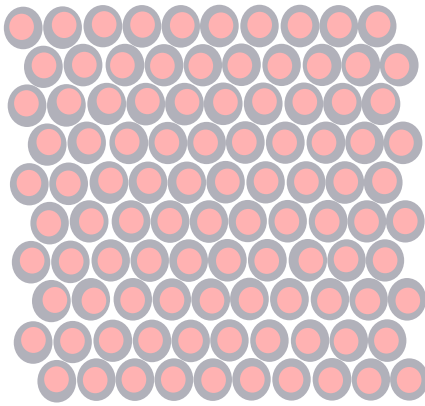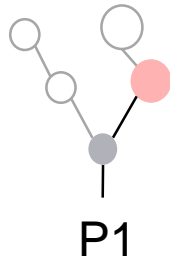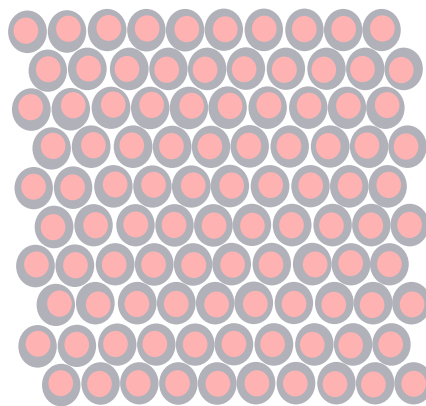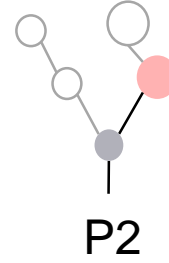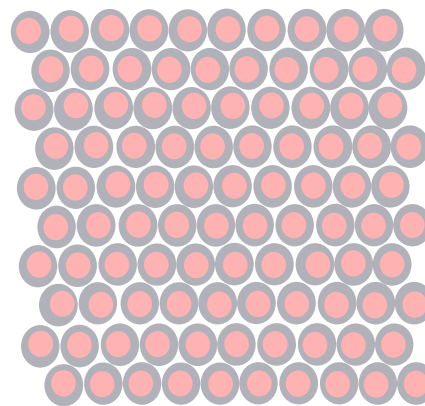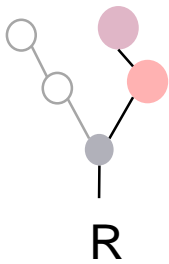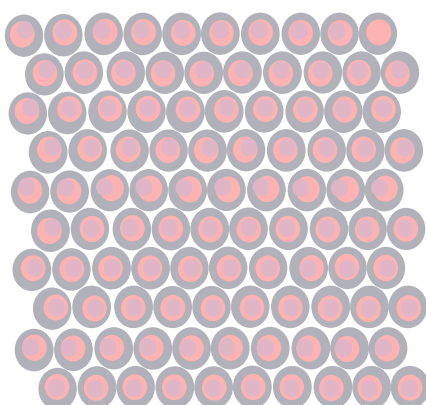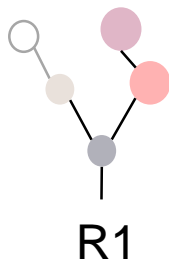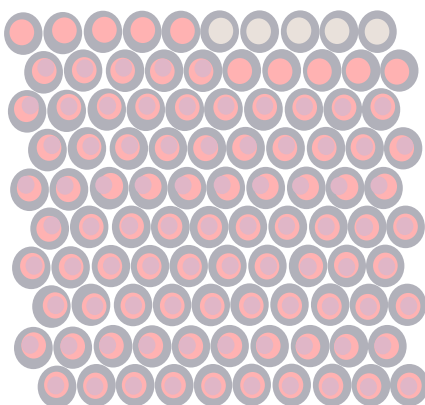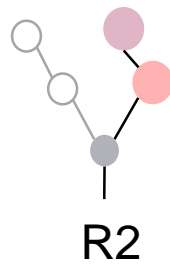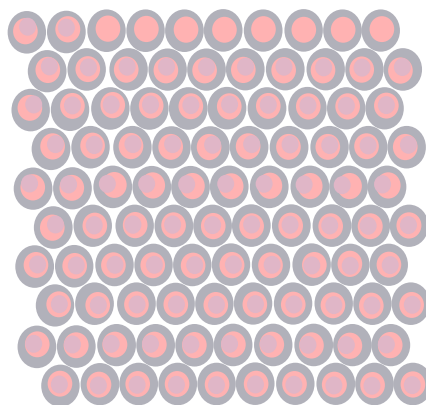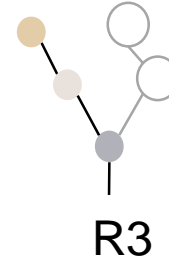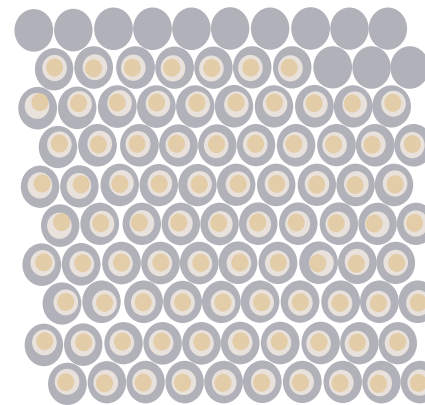



| Cluster | Gene          | Type |
|---------|---------------|------|
| ■       | <i>MUC4</i>   | Amp  |
| ■       | <i>CTNND2</i> | Amp  |
| ■       | <i>IL7R</i>   | Amp  |
| ■       | <i>LIFR</i>   | Amp  |

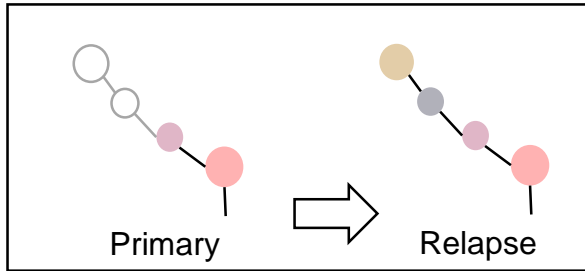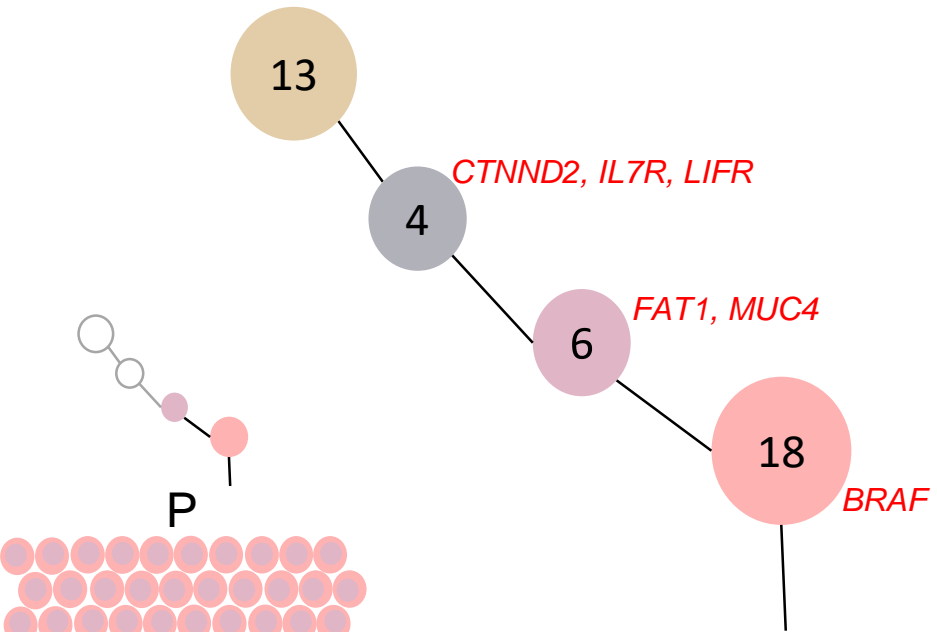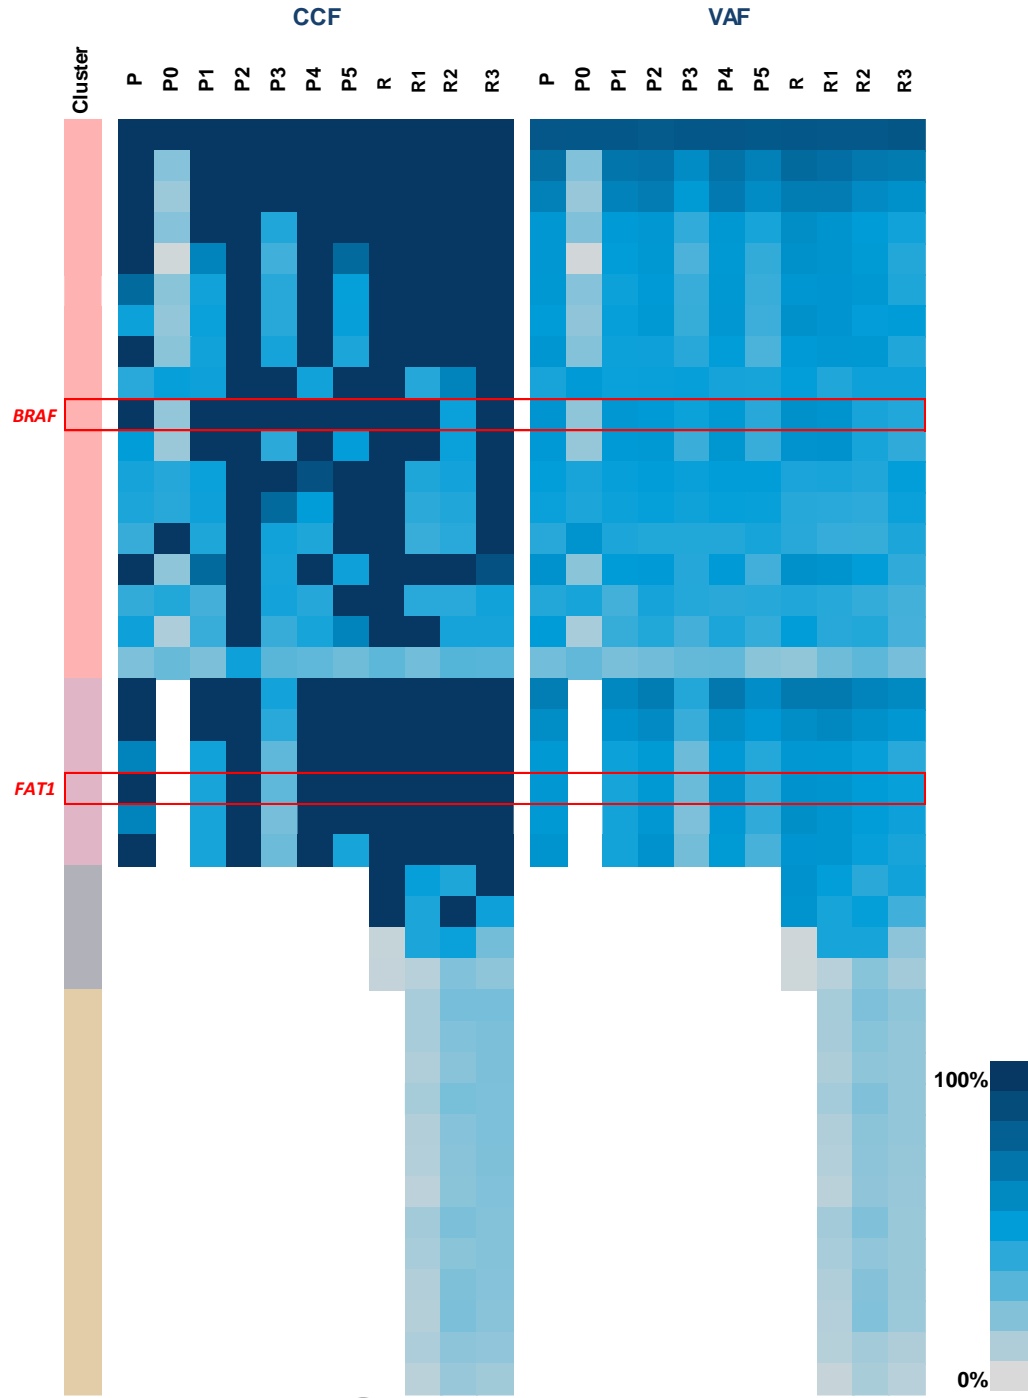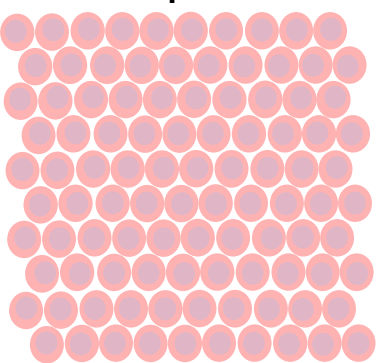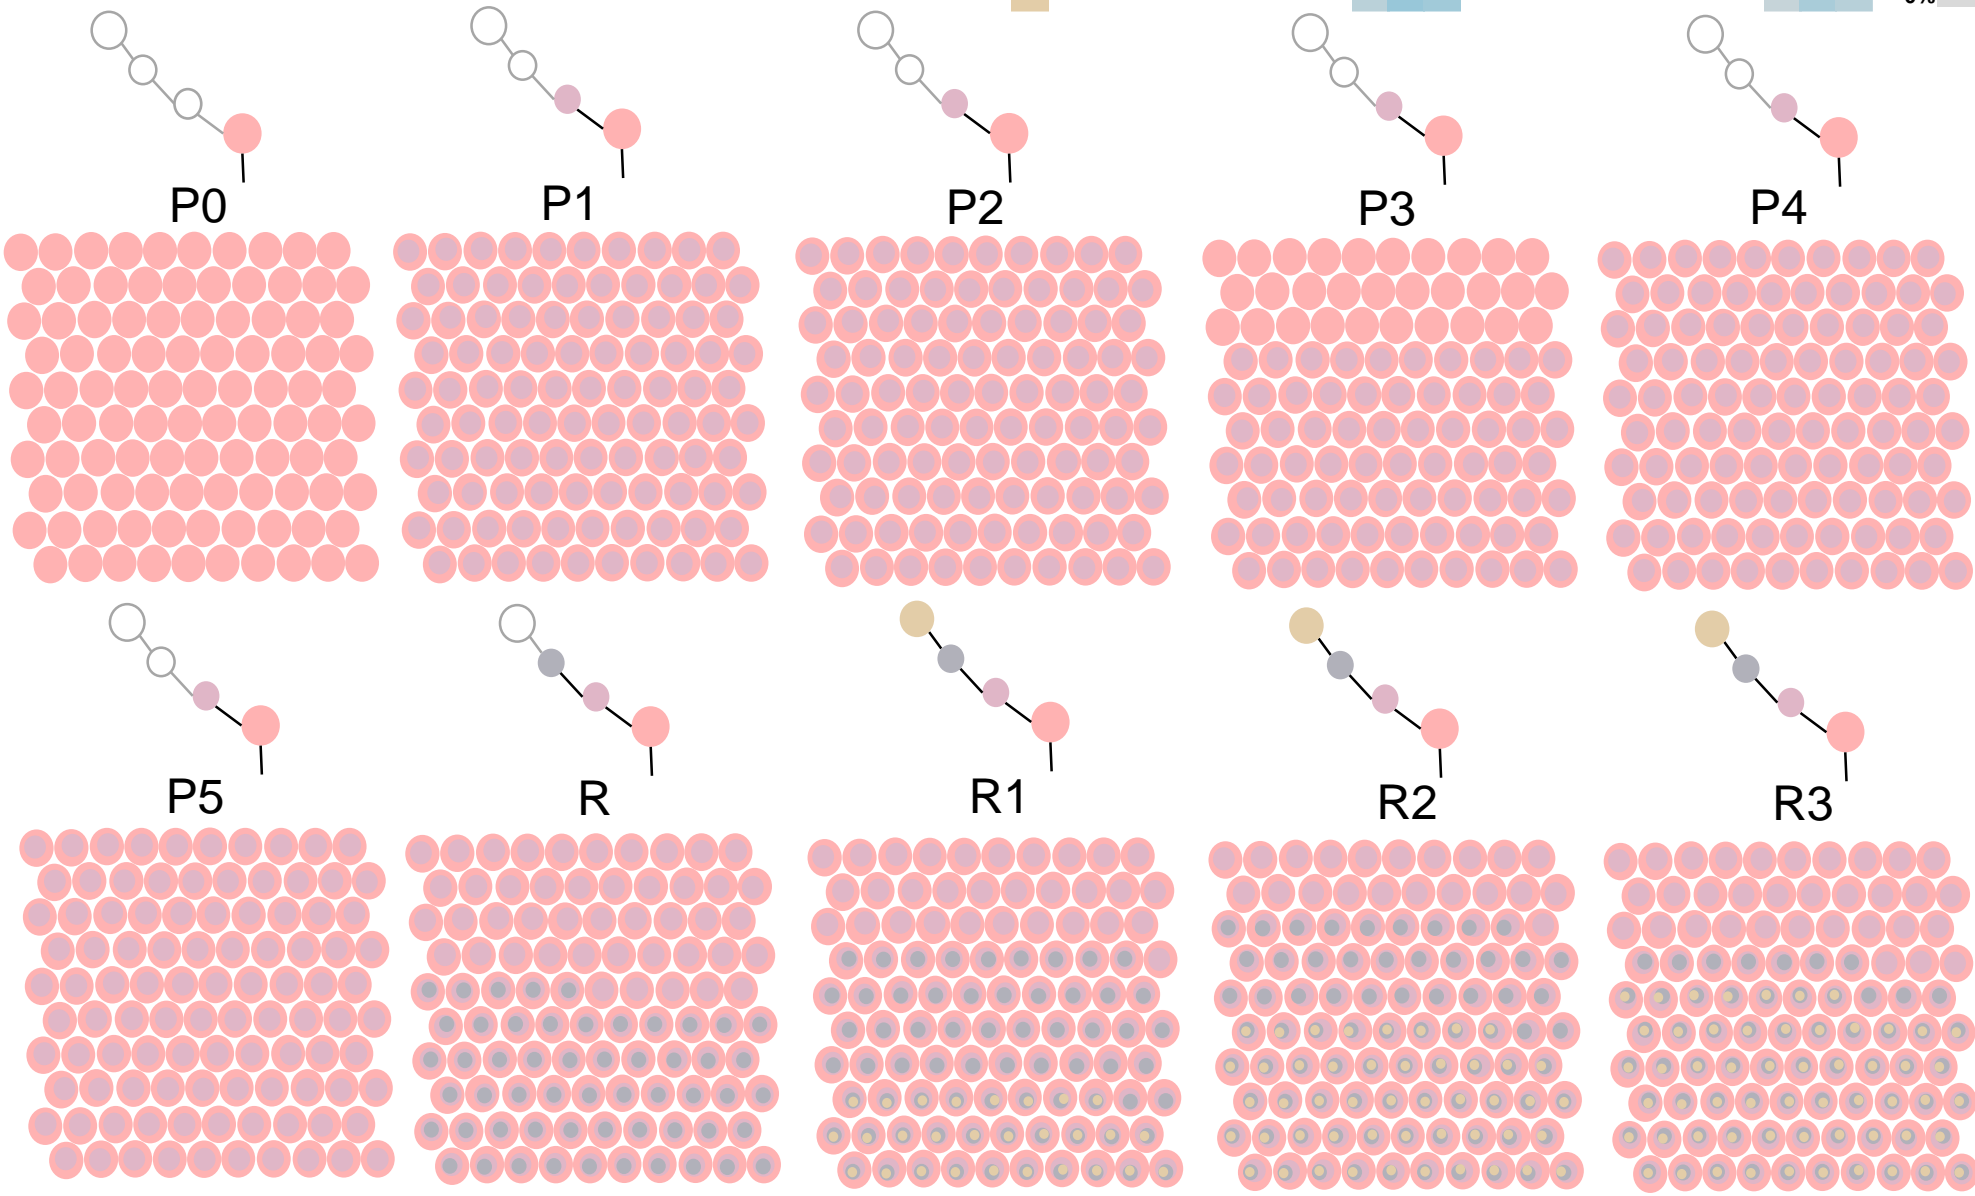

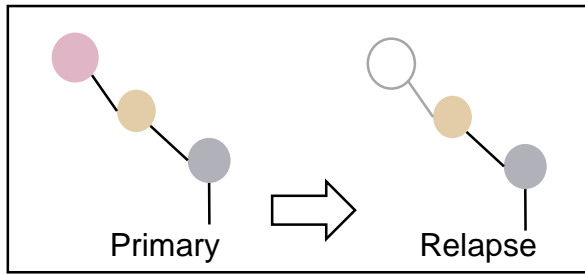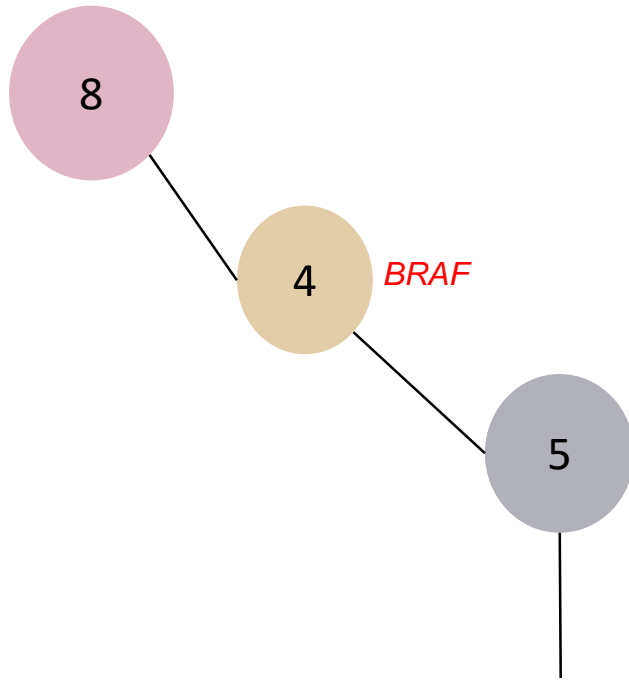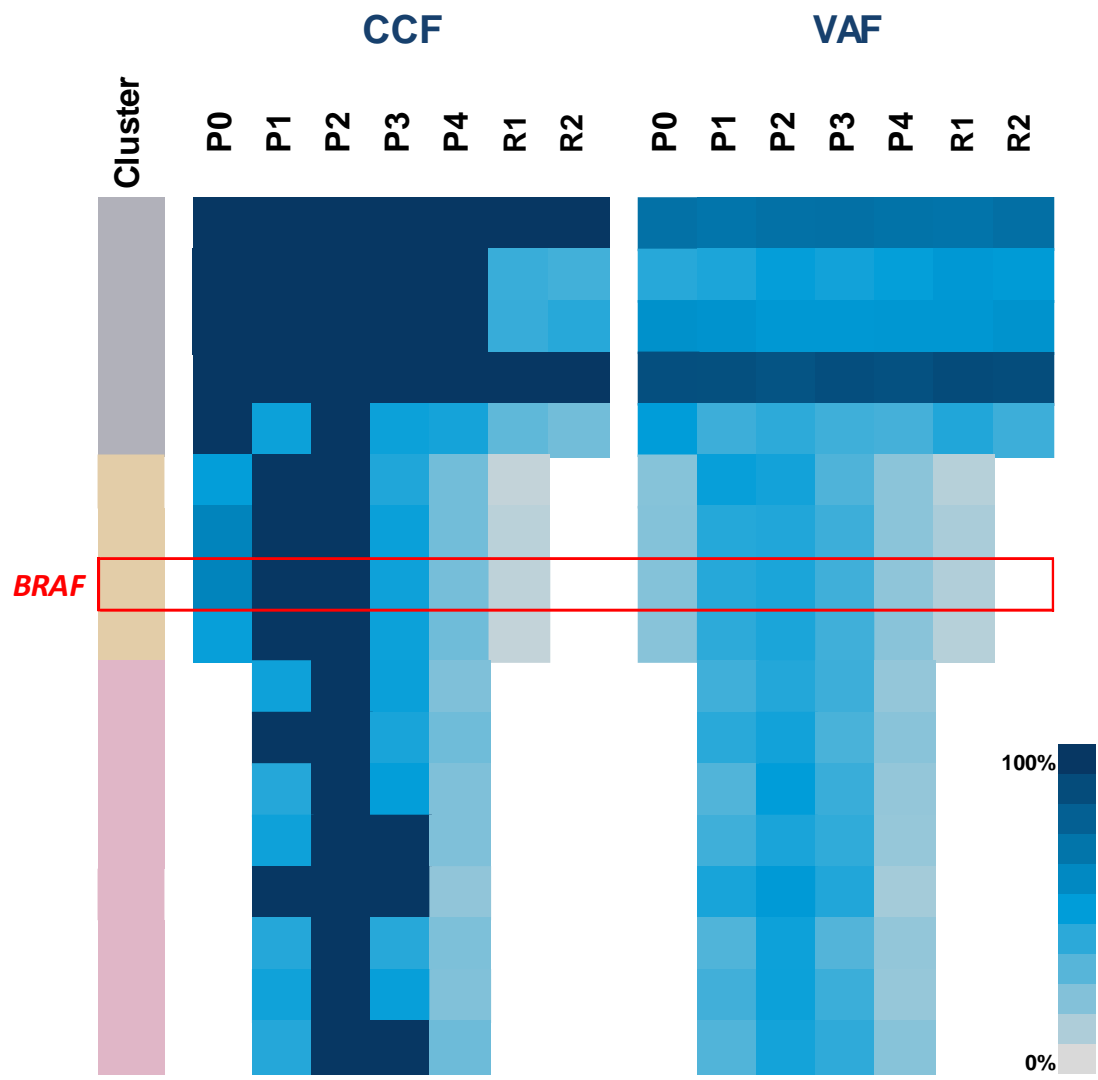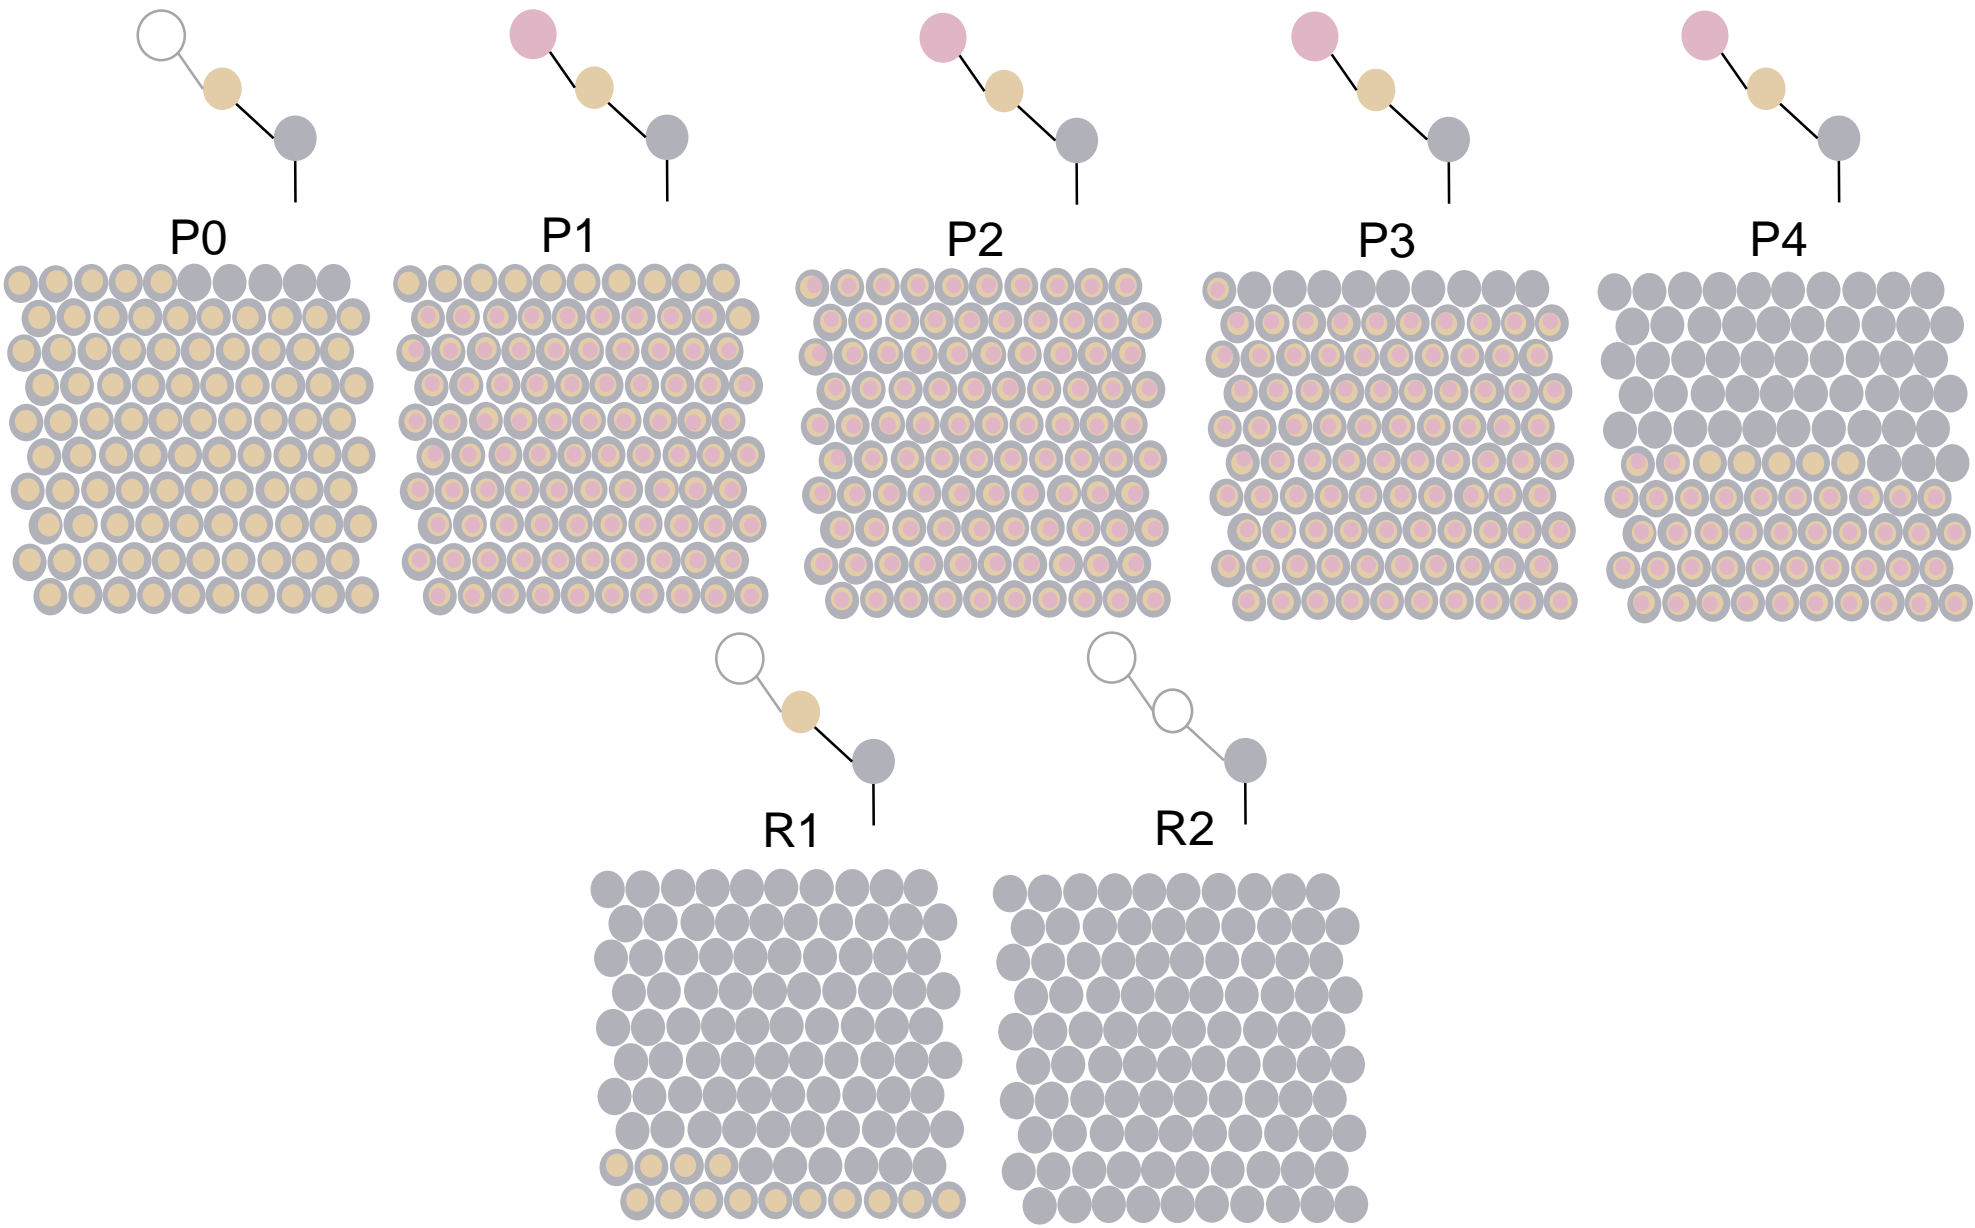

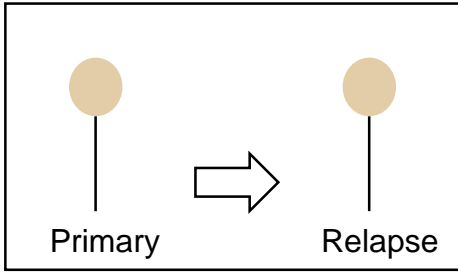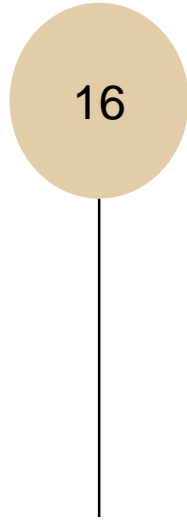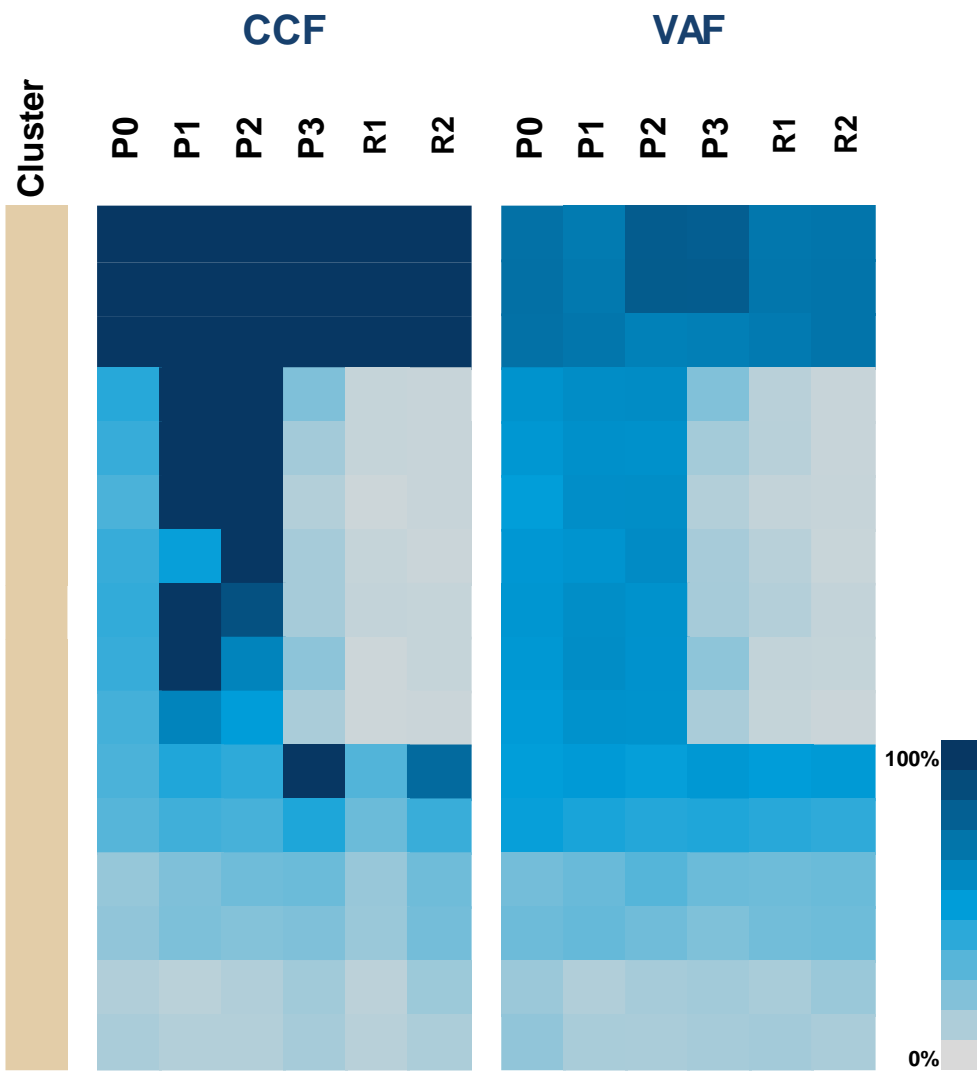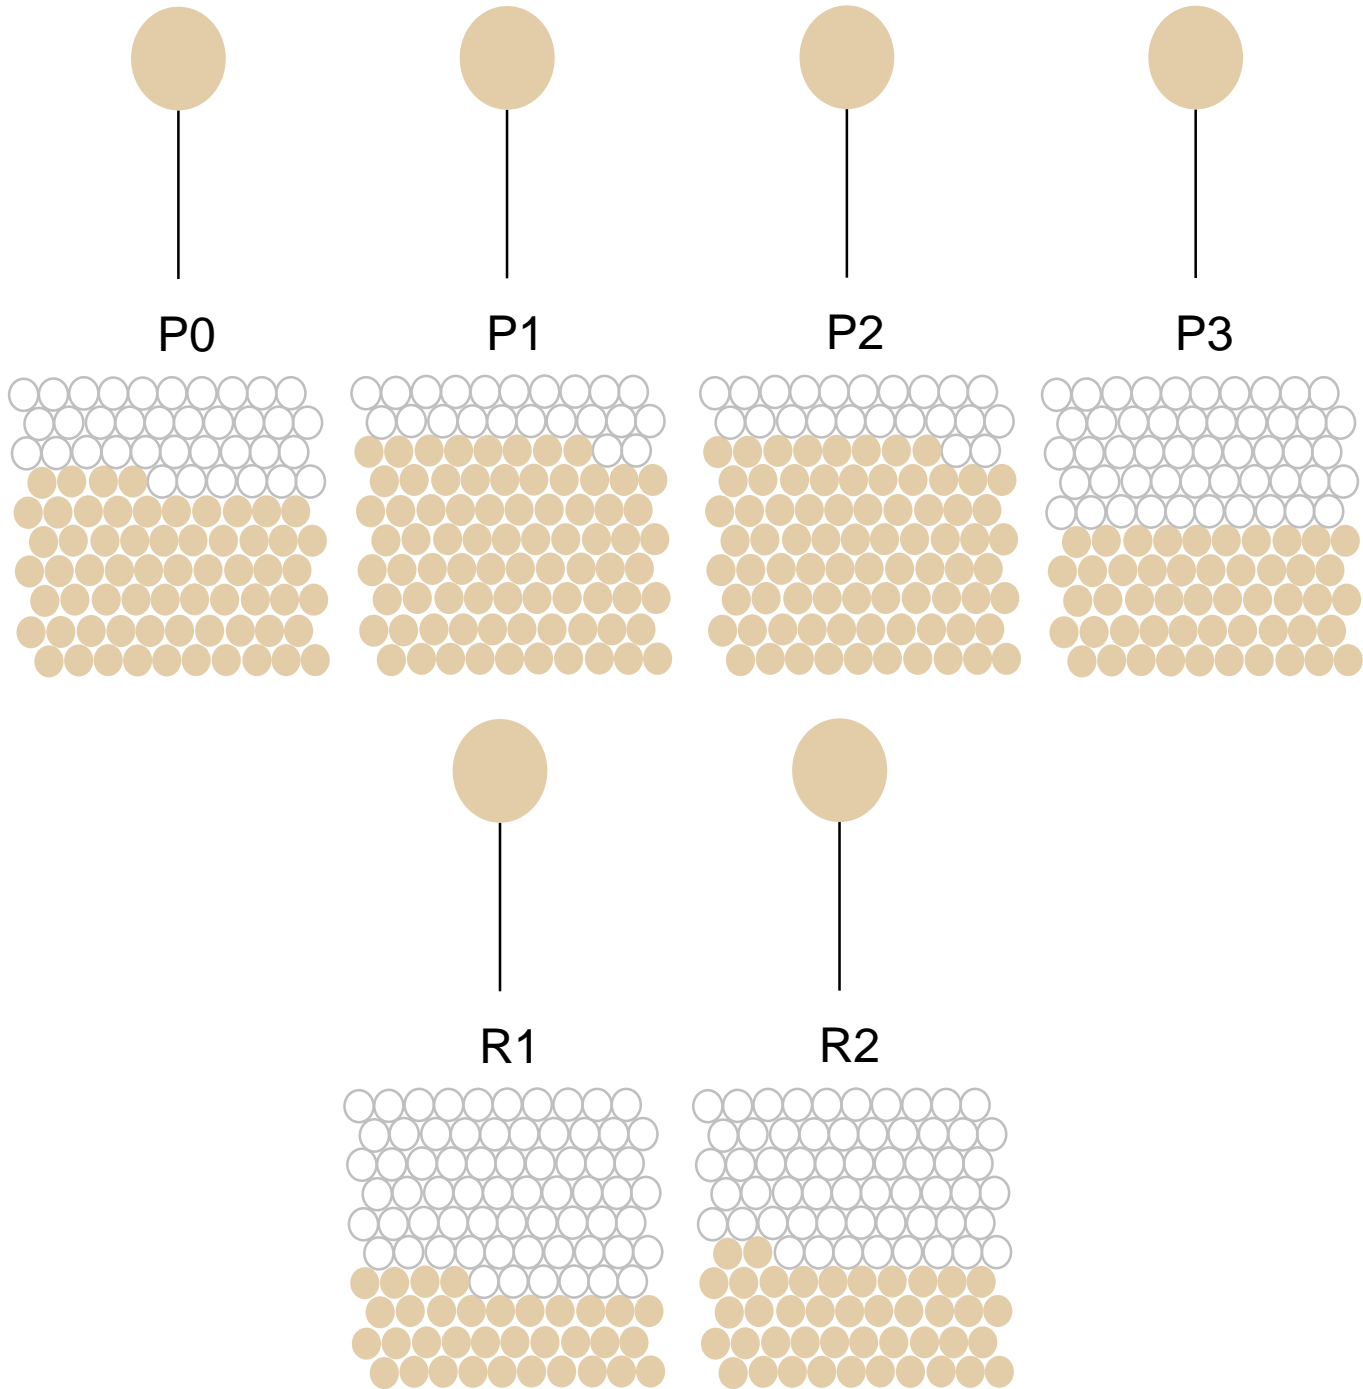

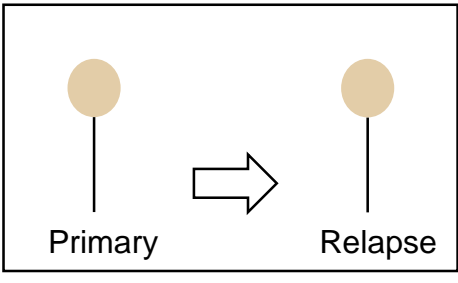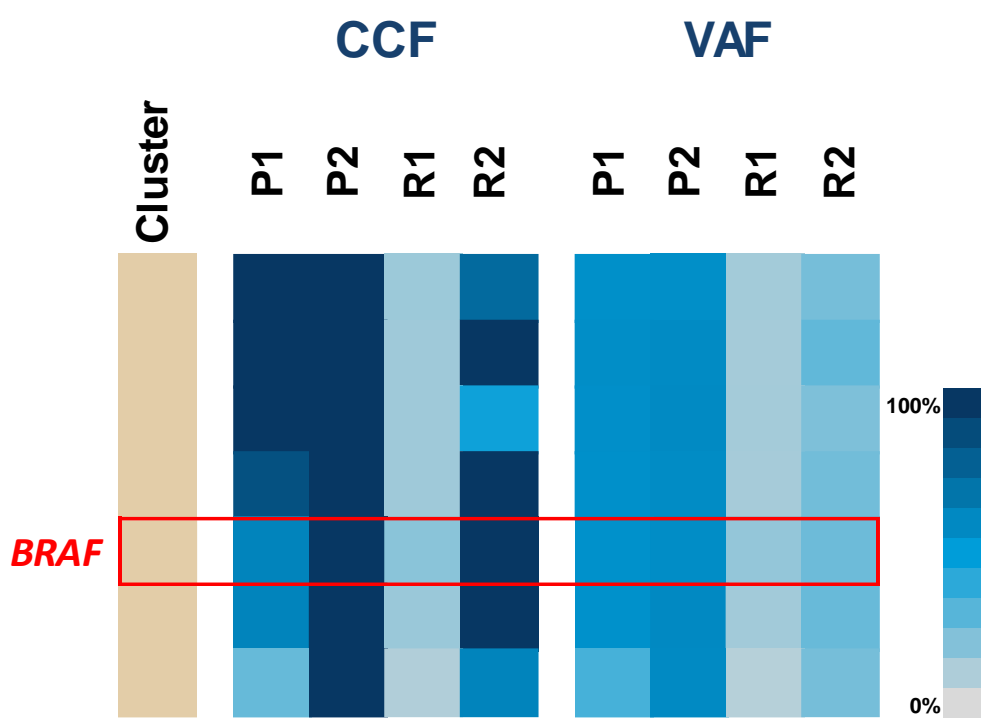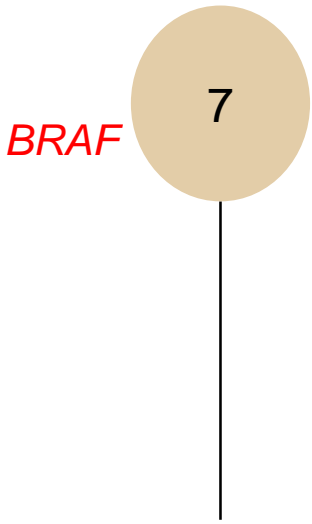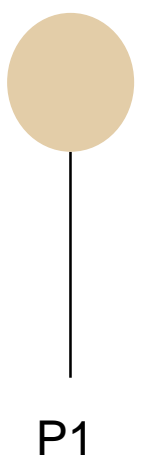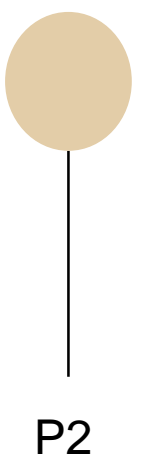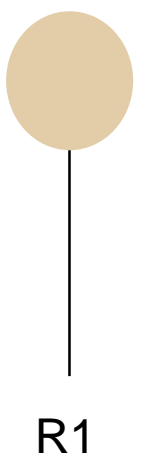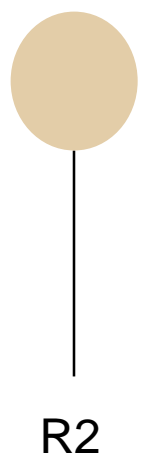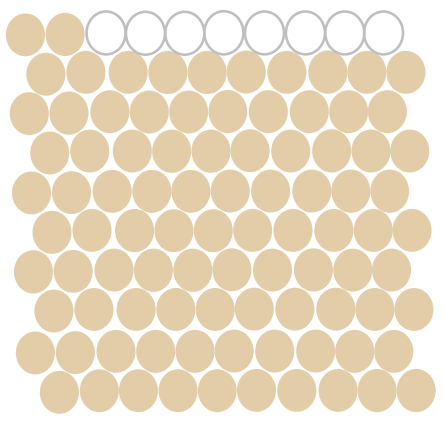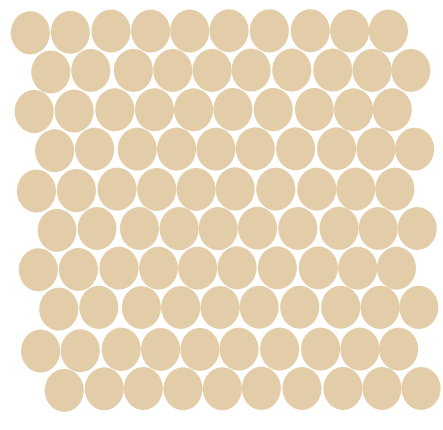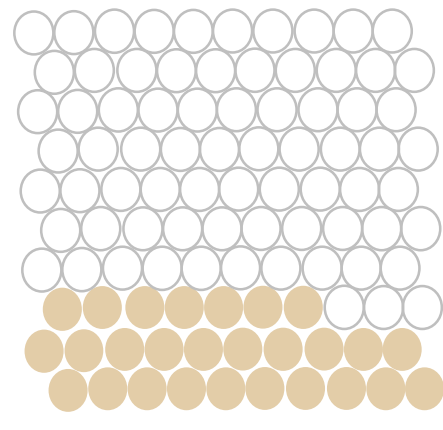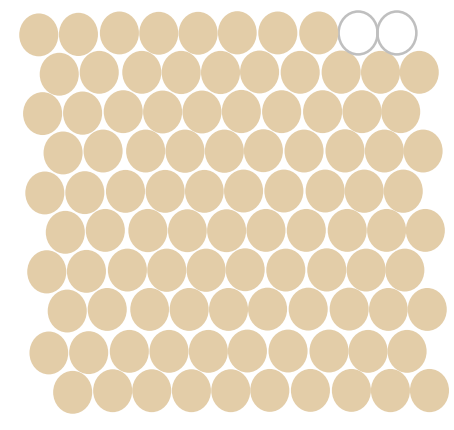

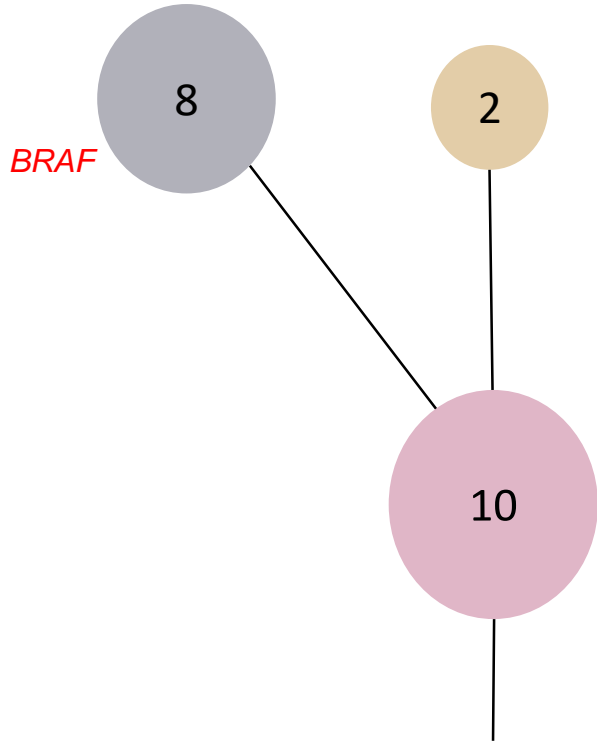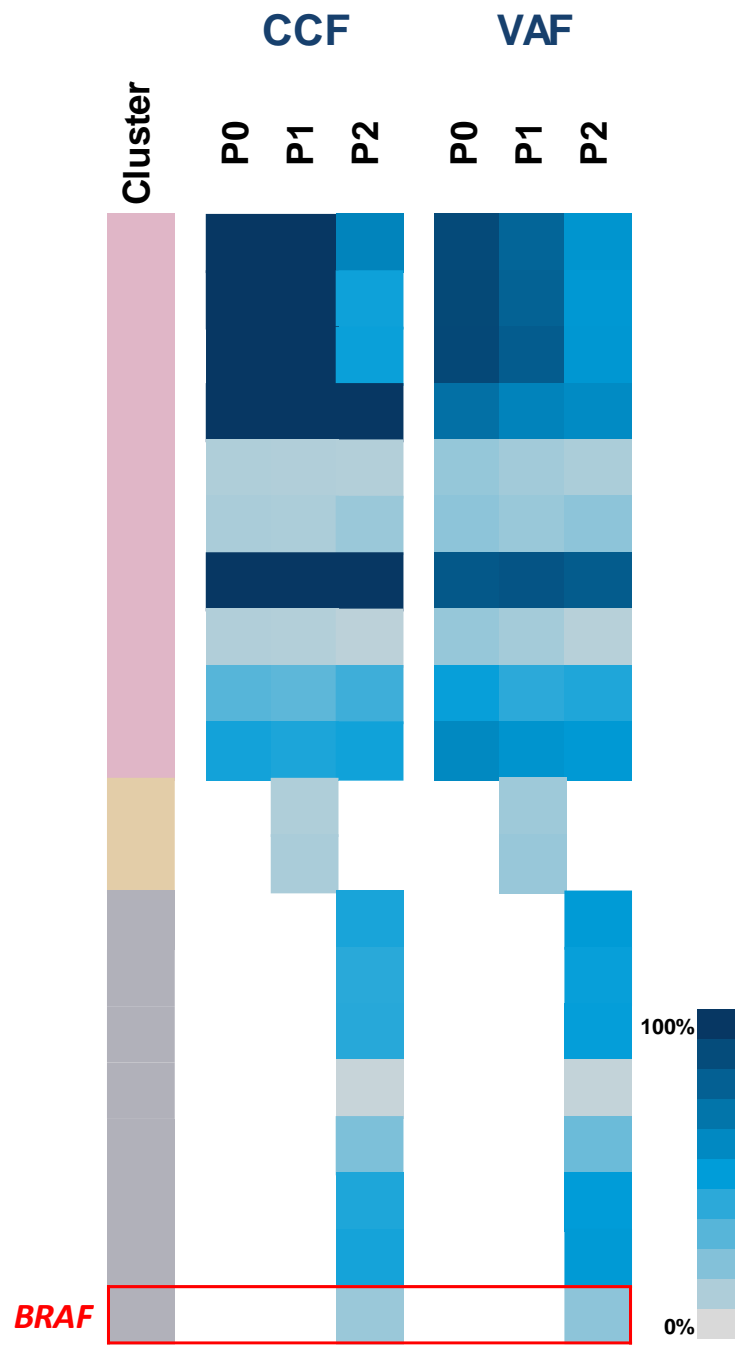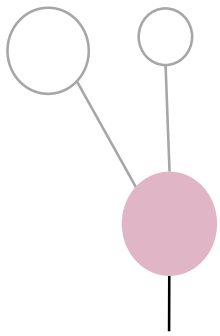

P0

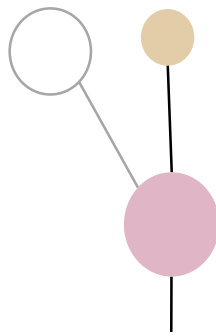

P1

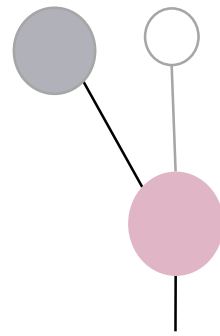

P2

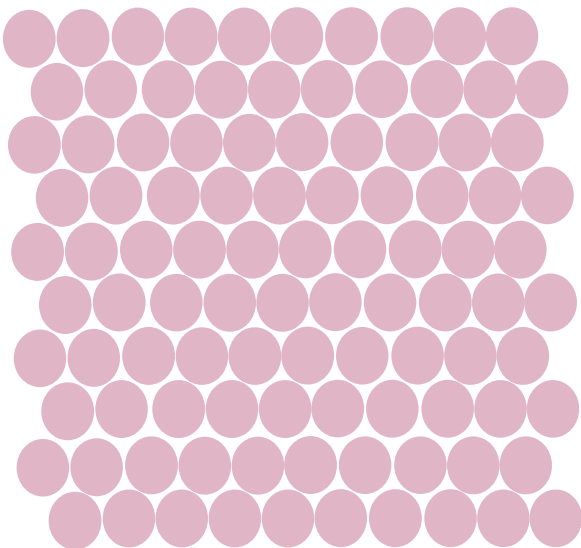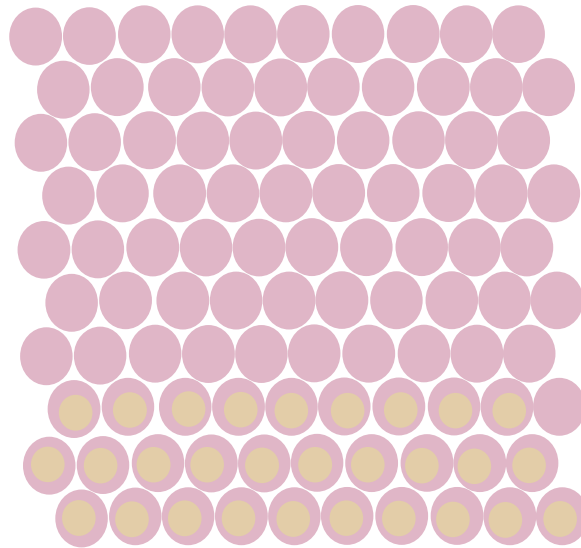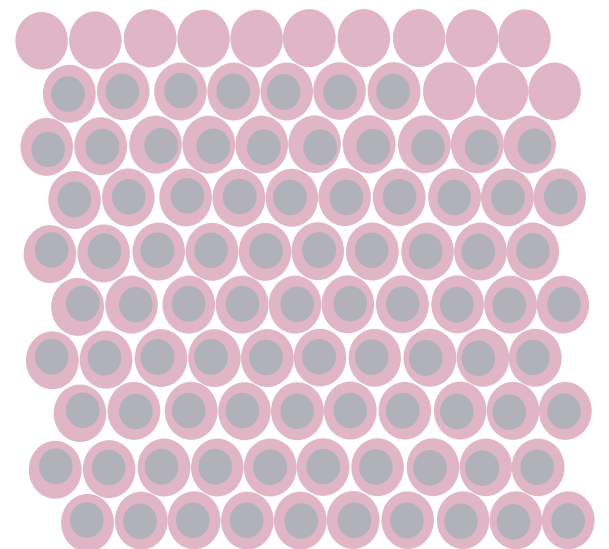

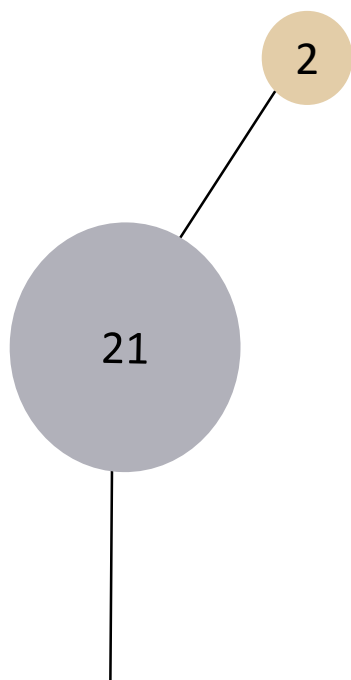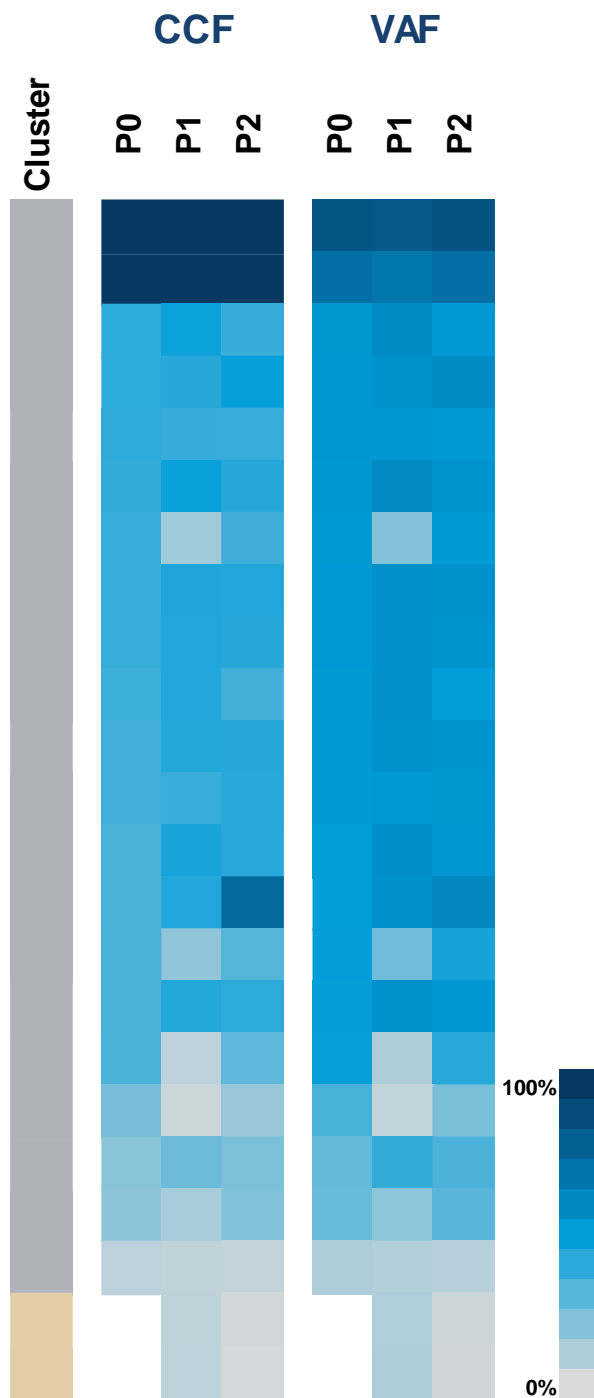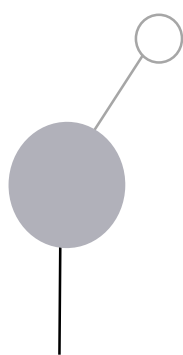

P0

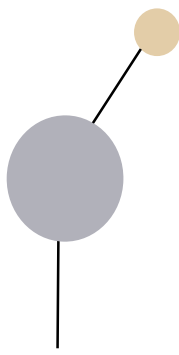

P1

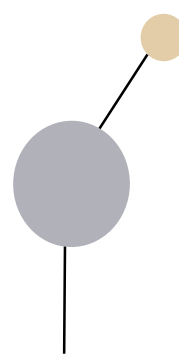

P2

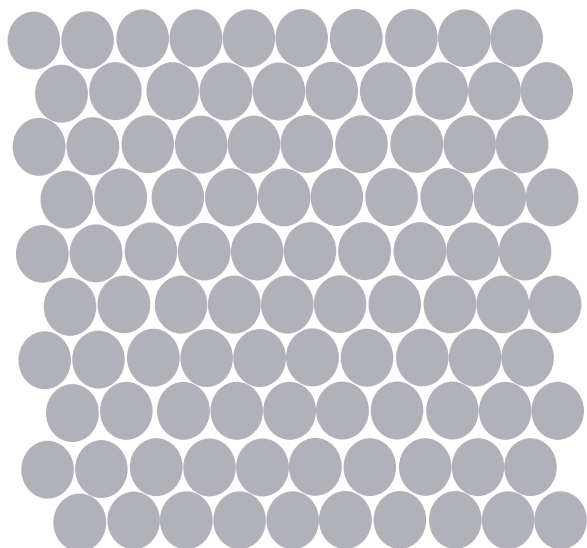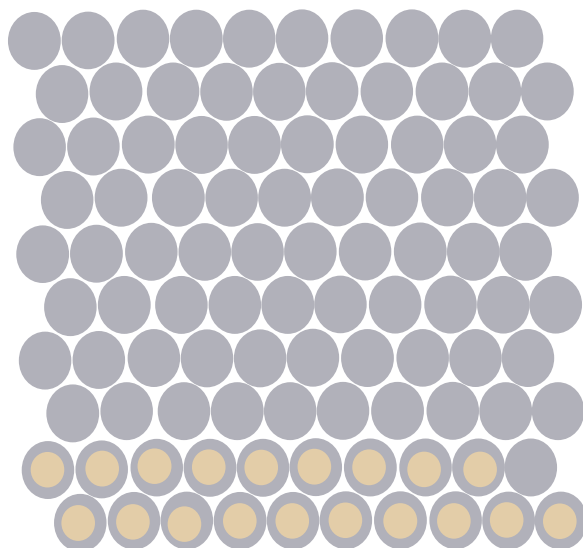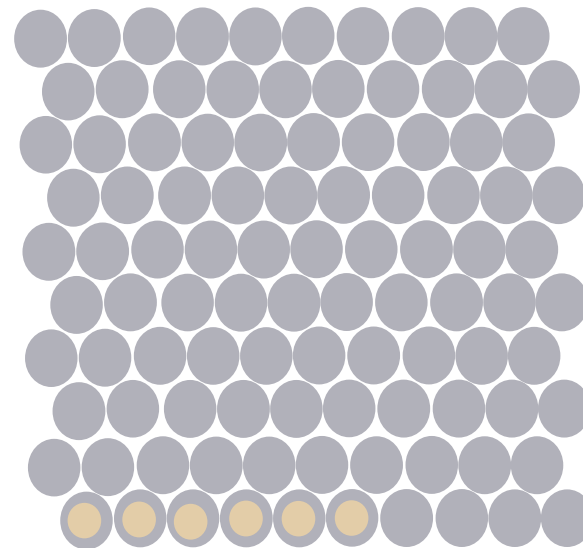

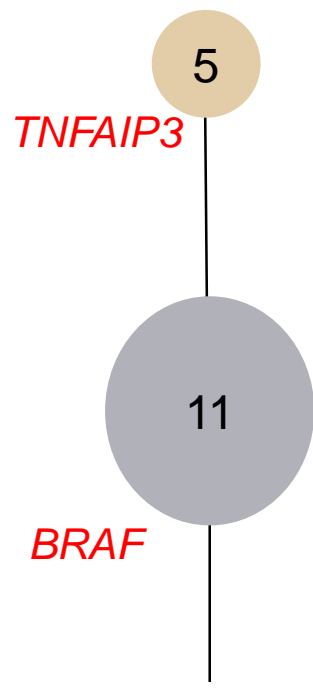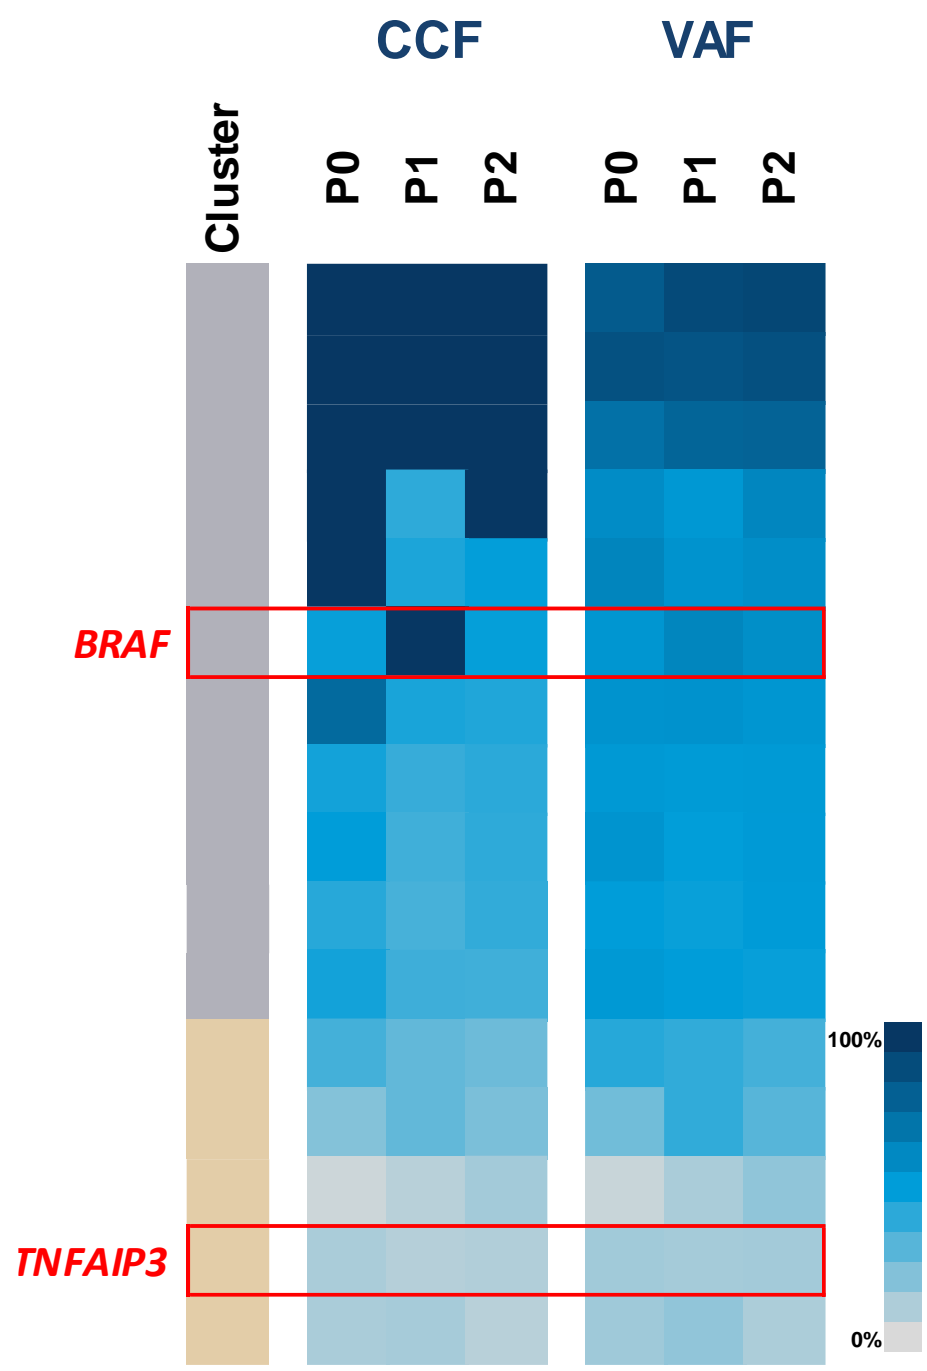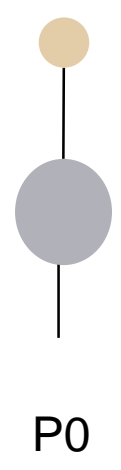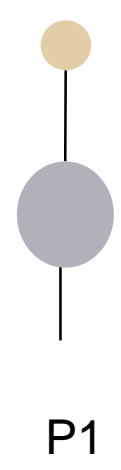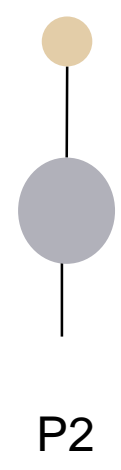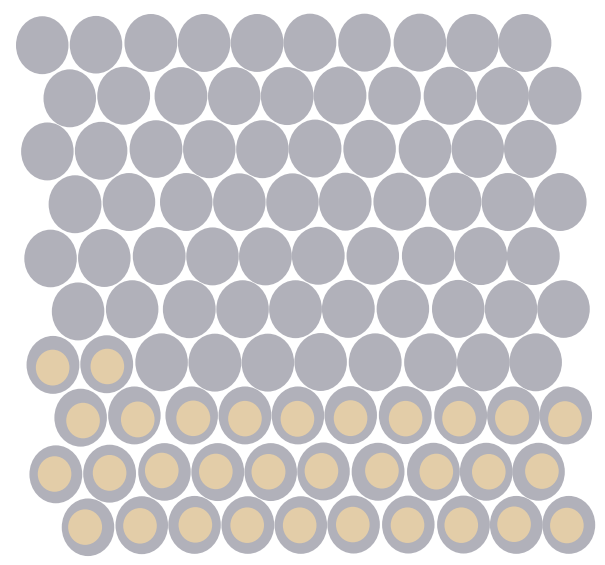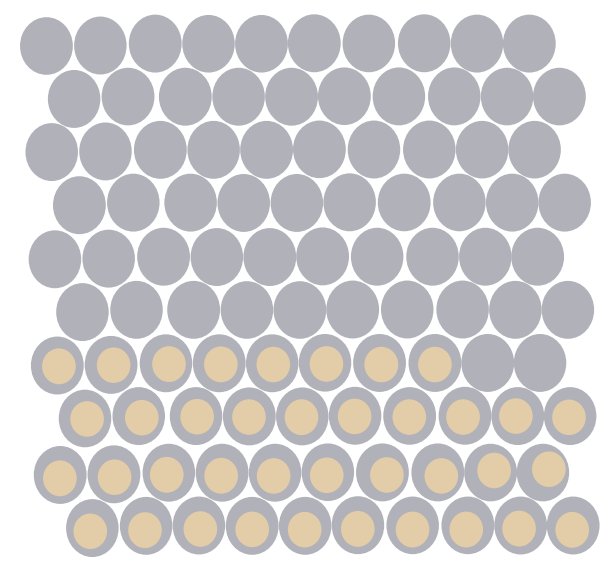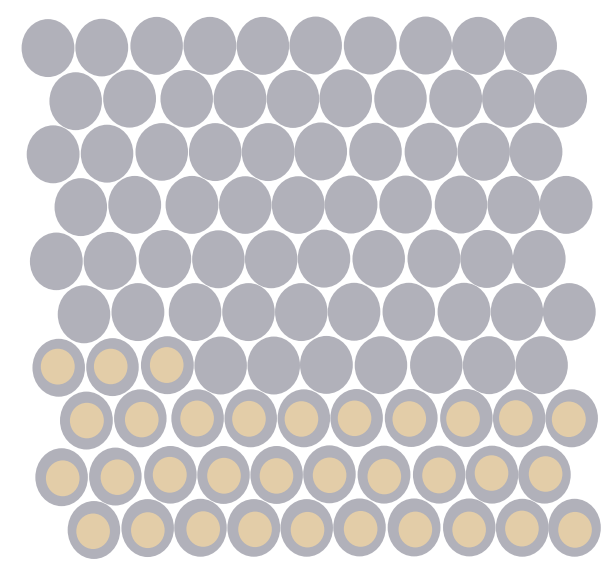

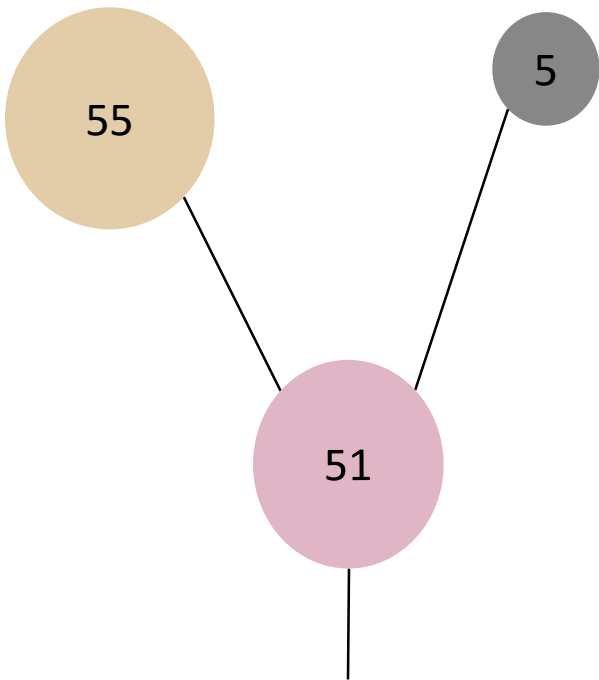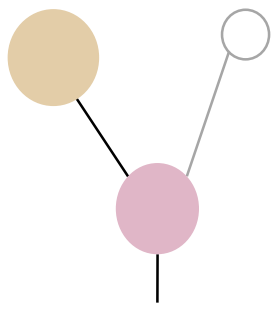

P0

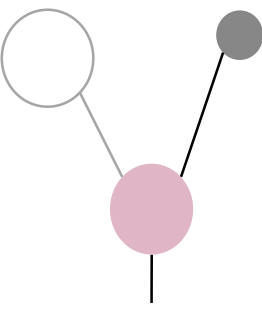

P1

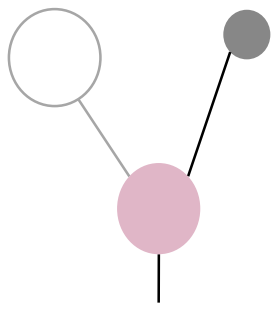

P2

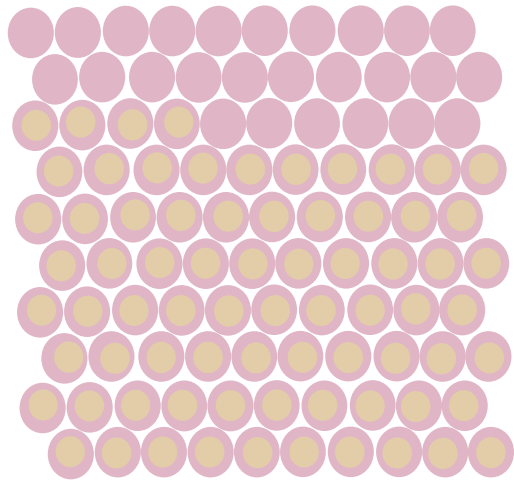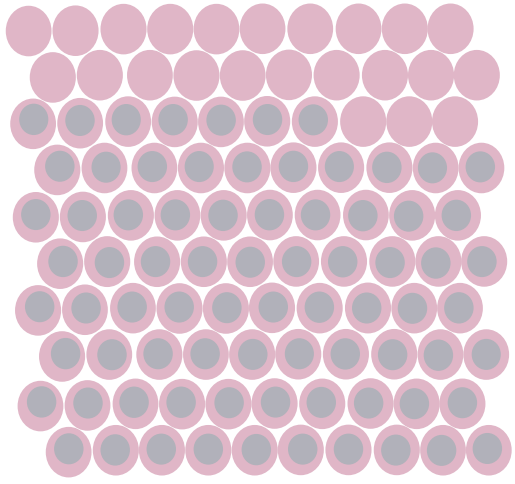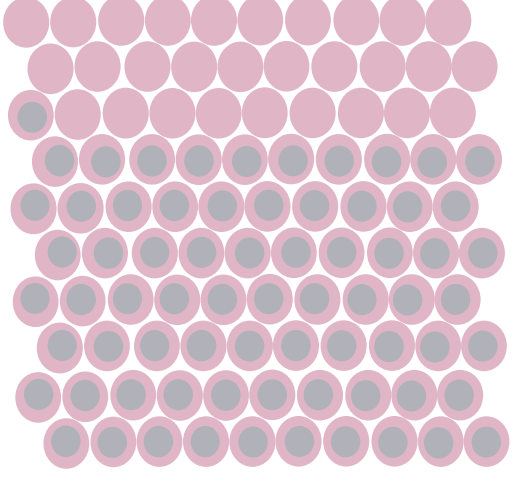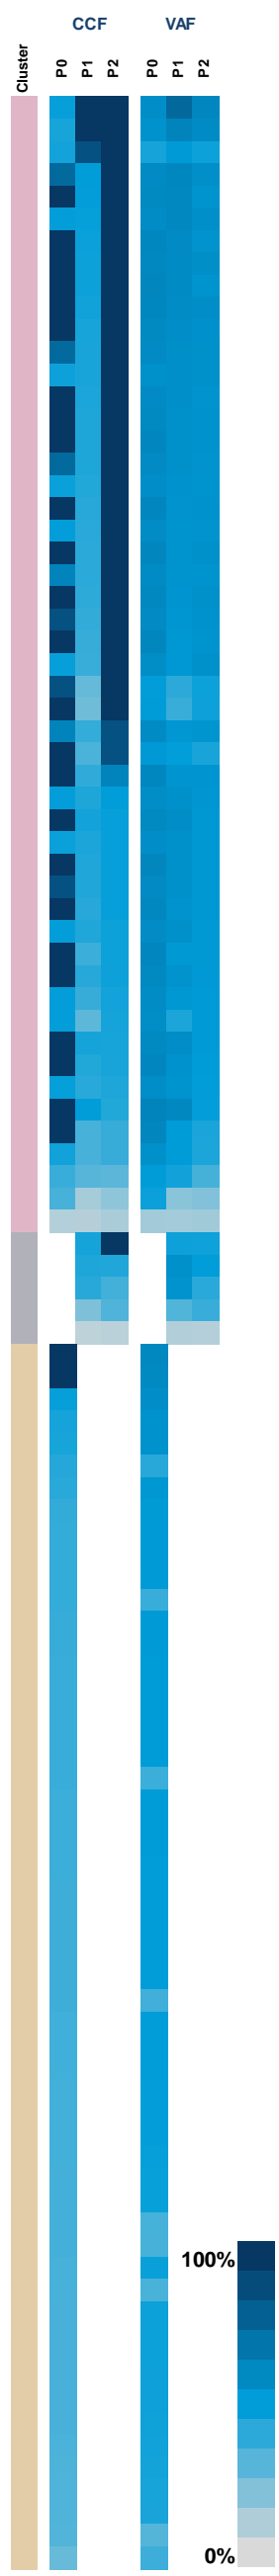





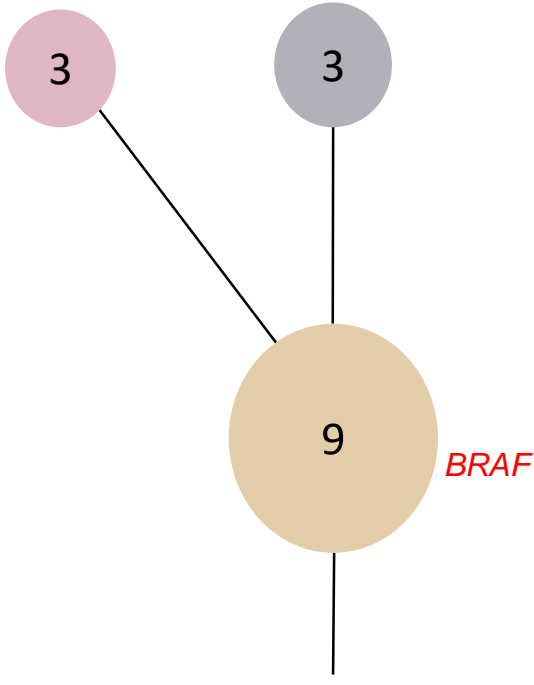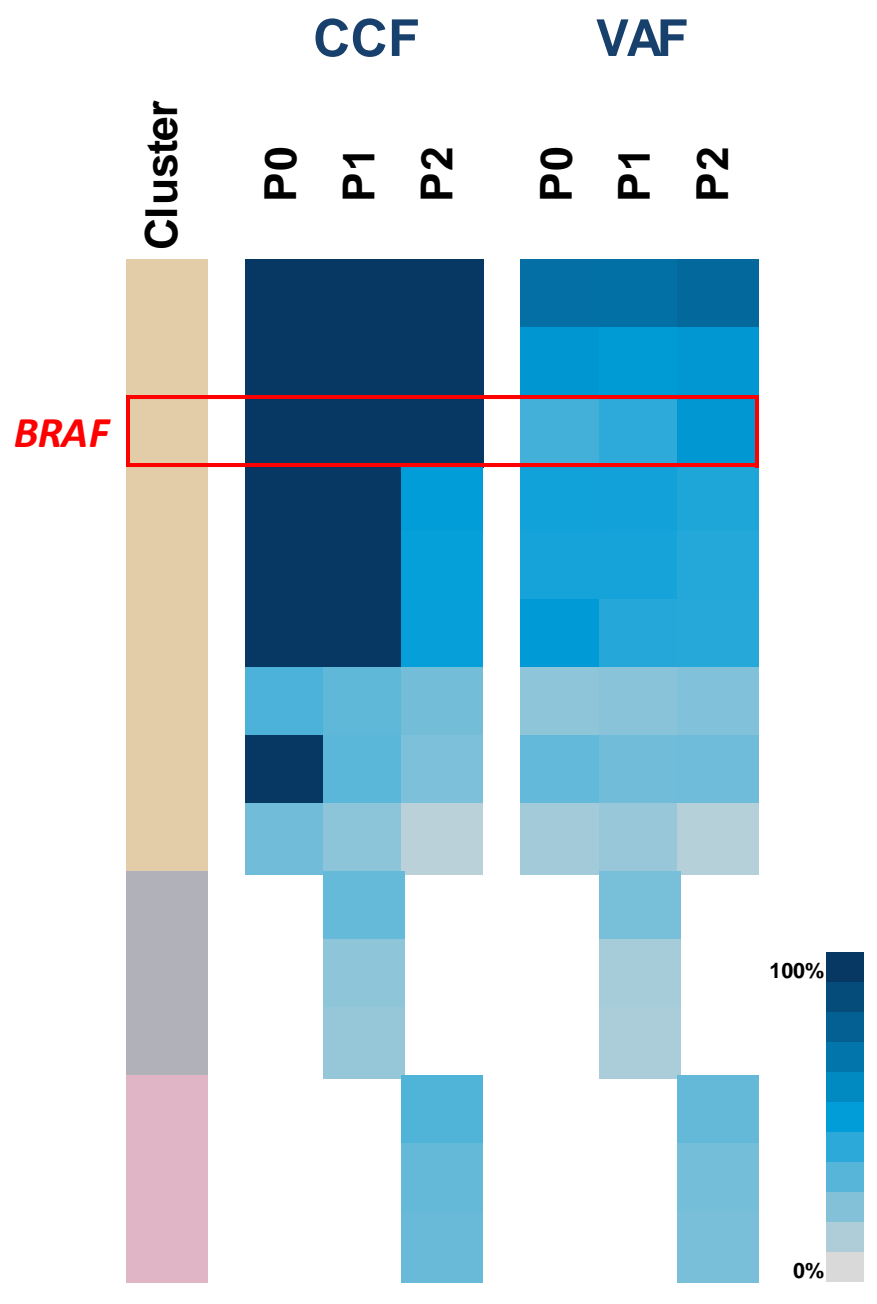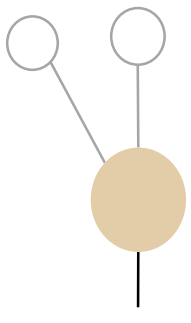

P0

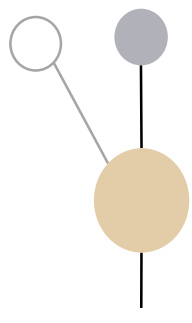

P1

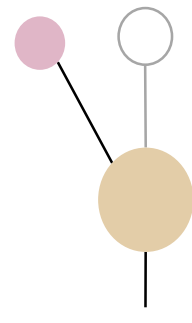

P2

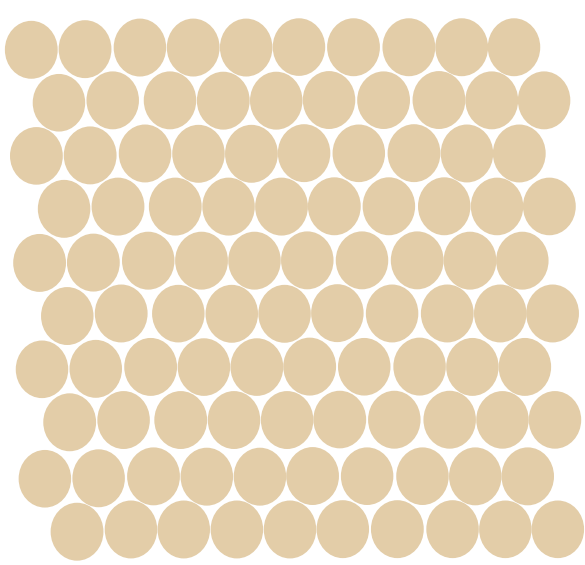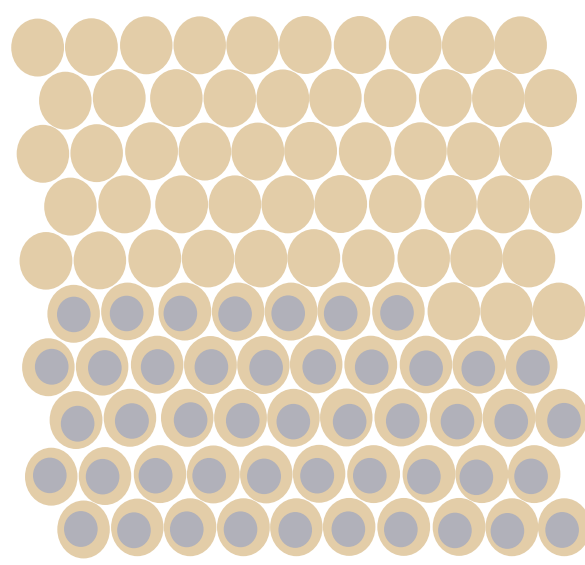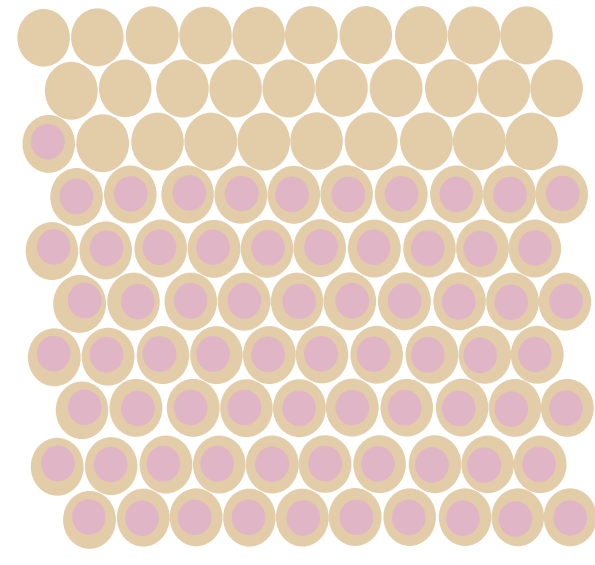

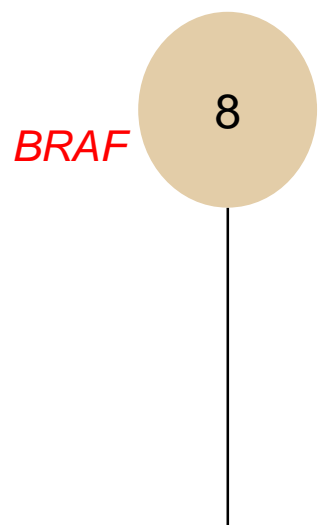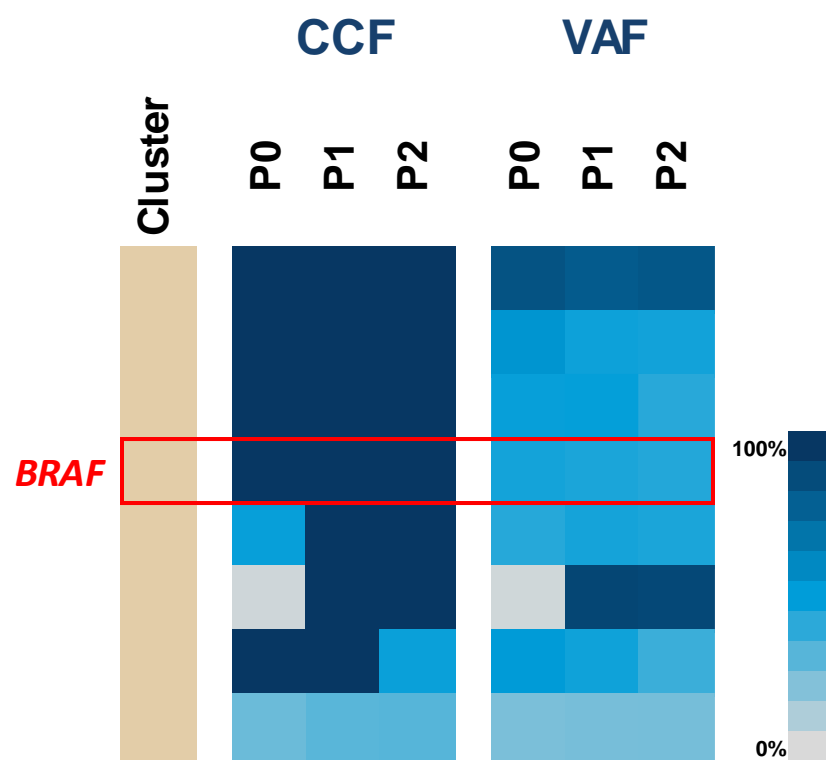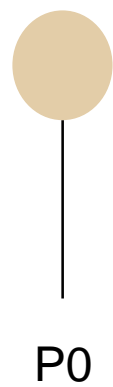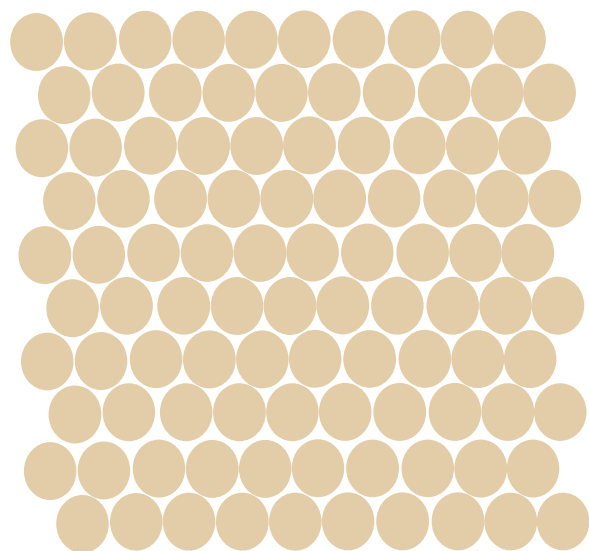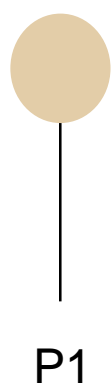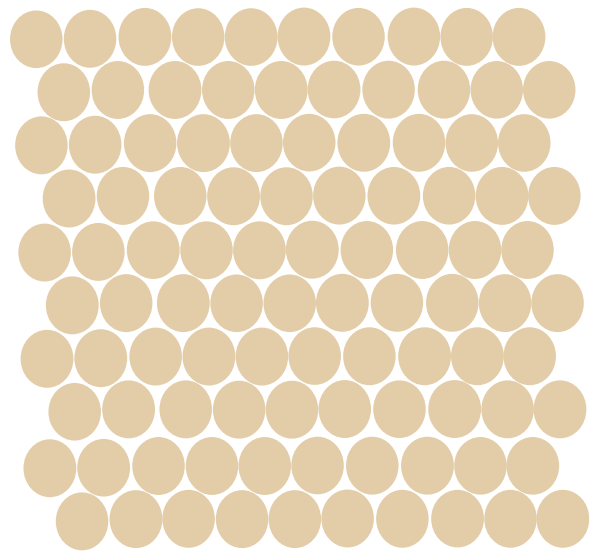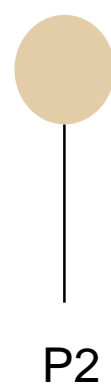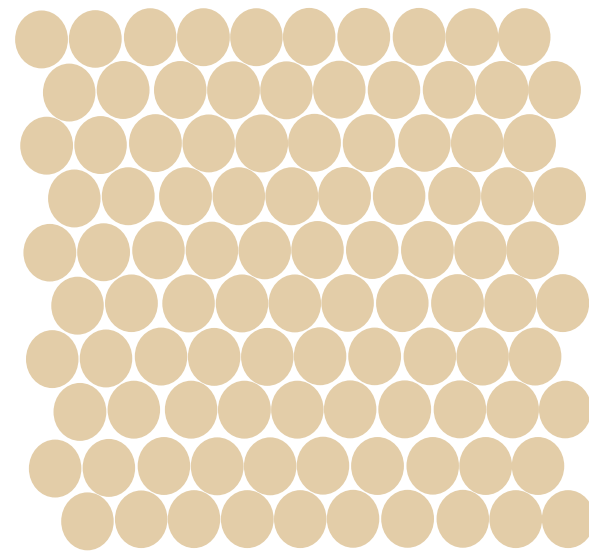



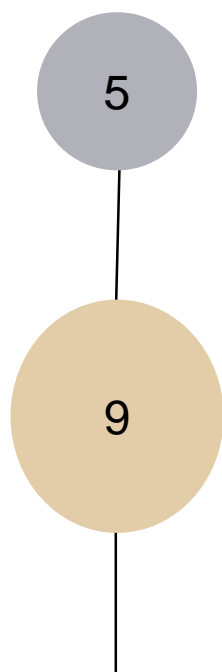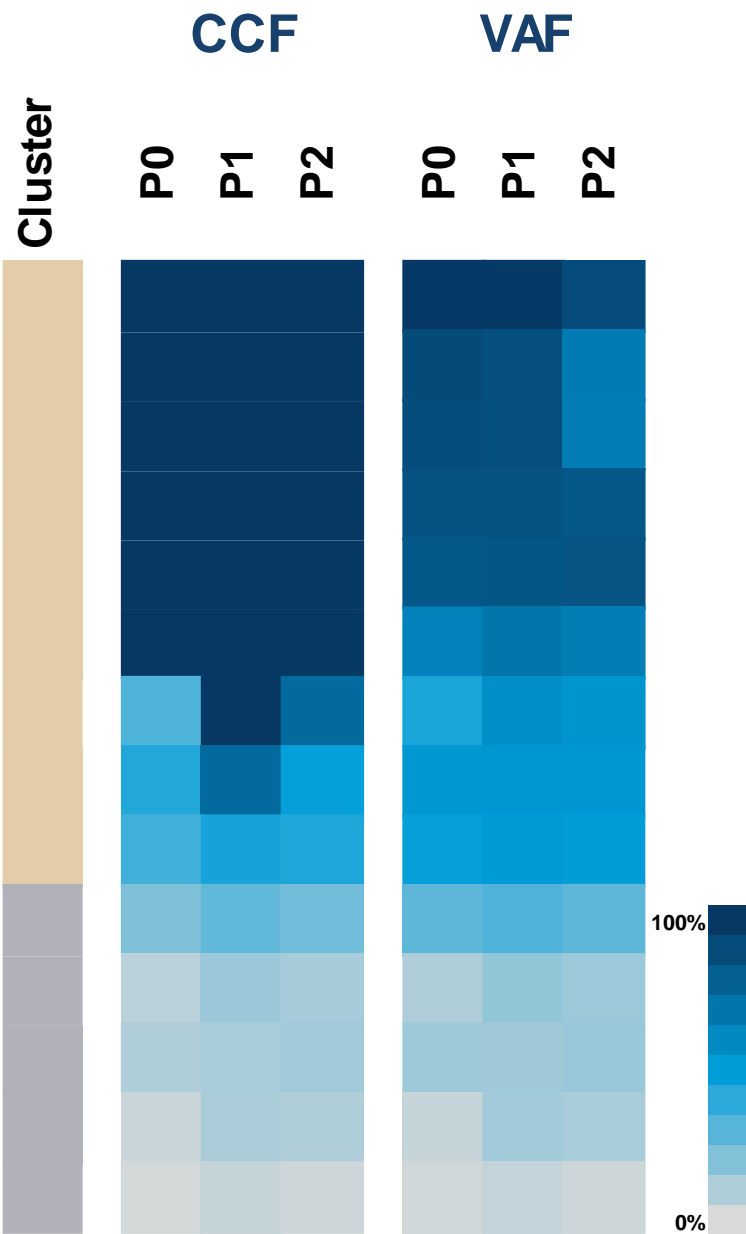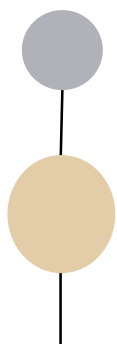

P0

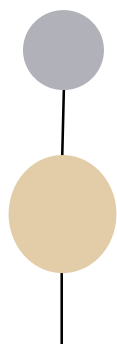

P1

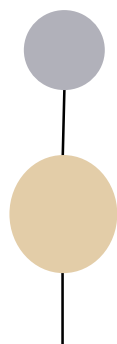

P2

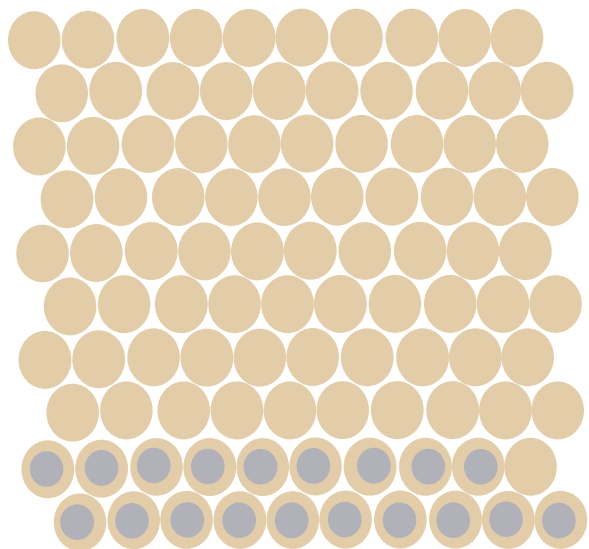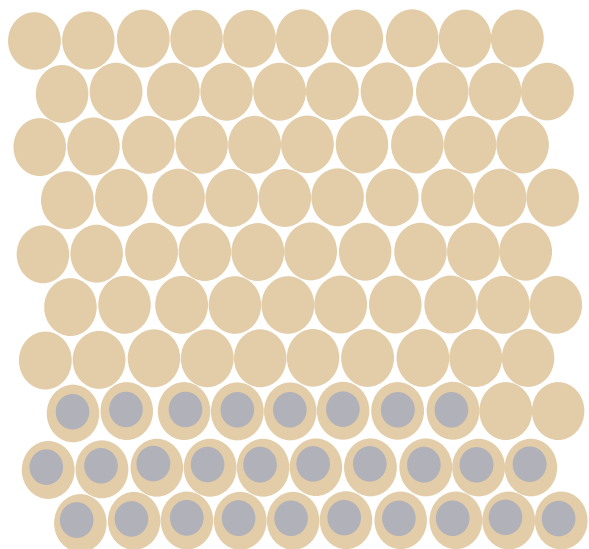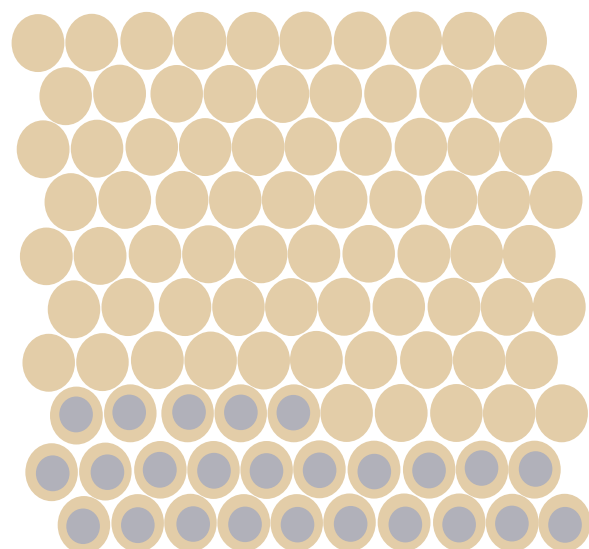

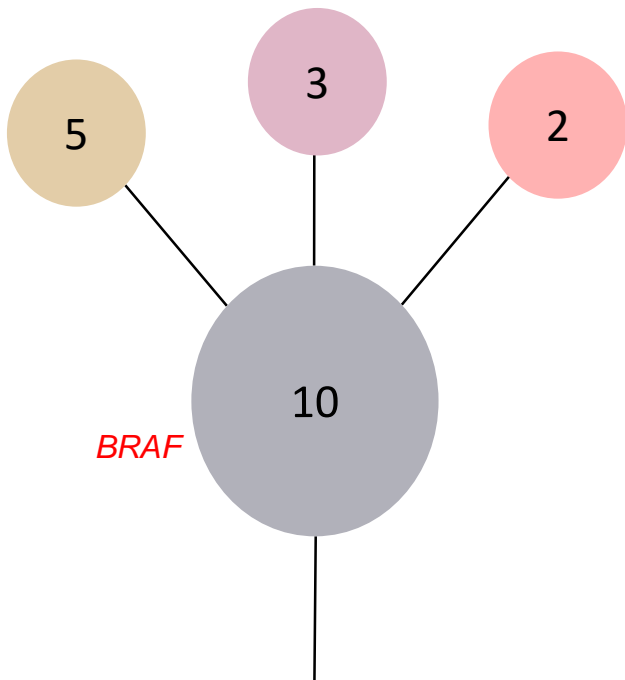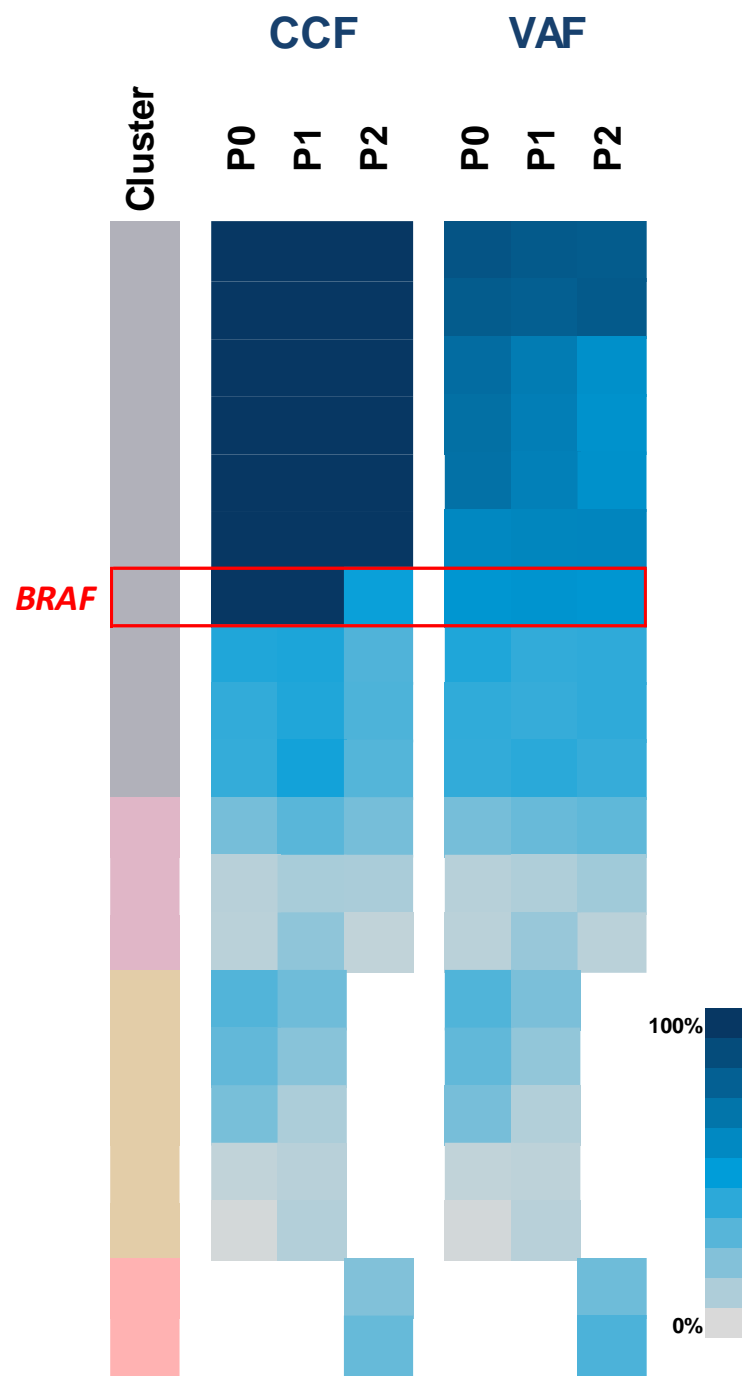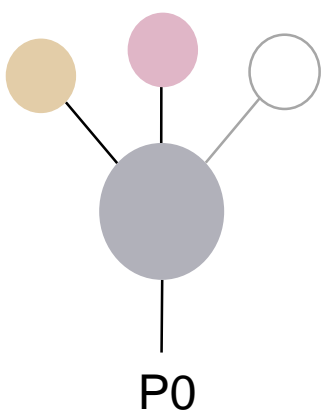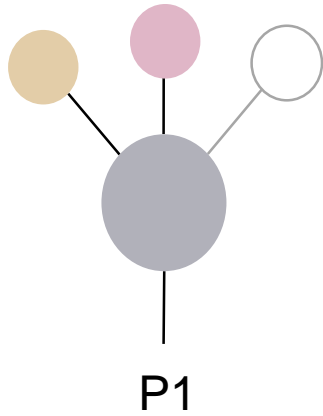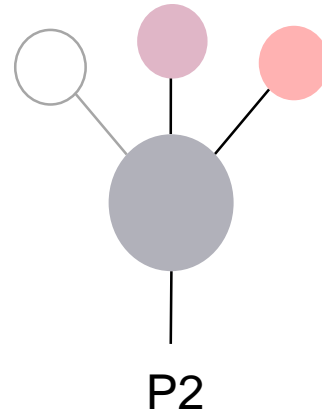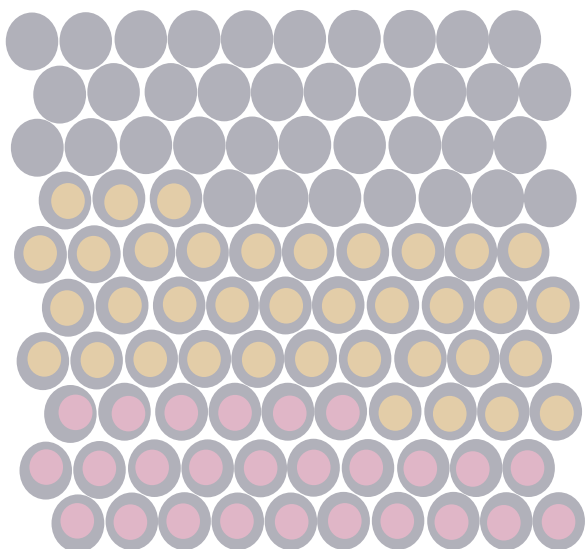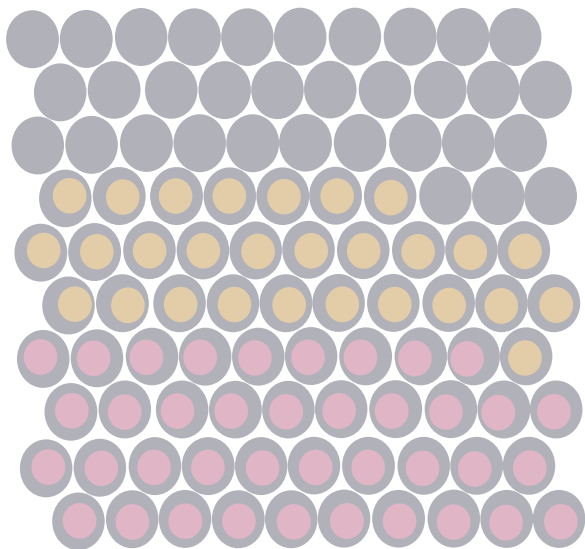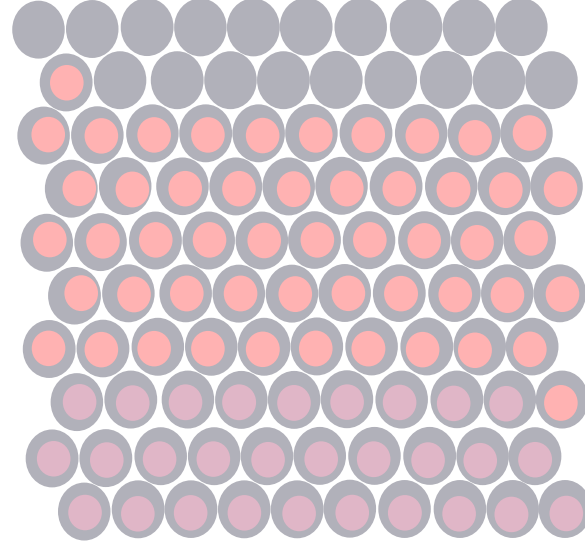

# B Non-relapse cases

697

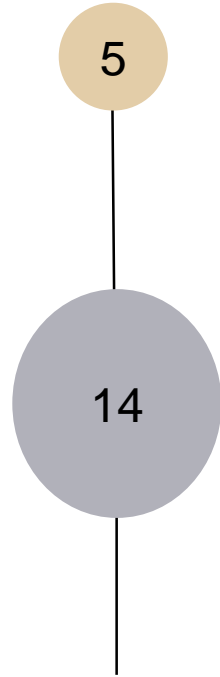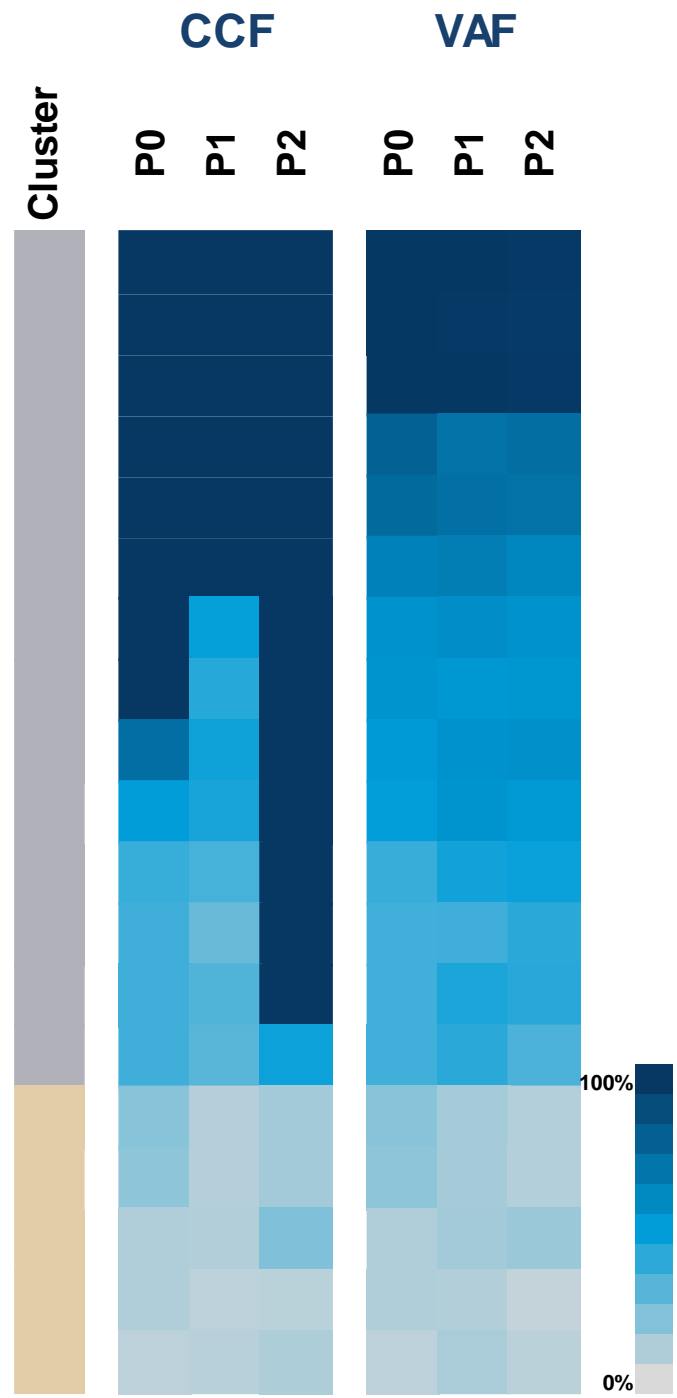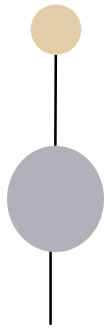

P0

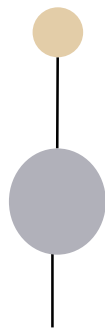

P1

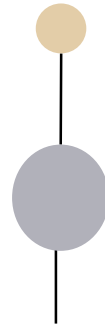

P2

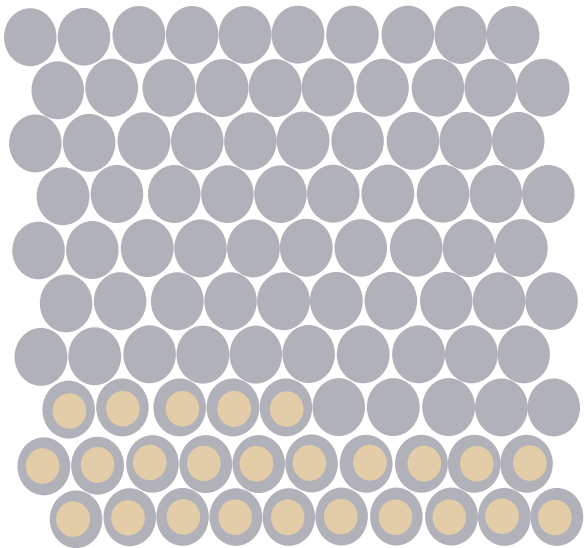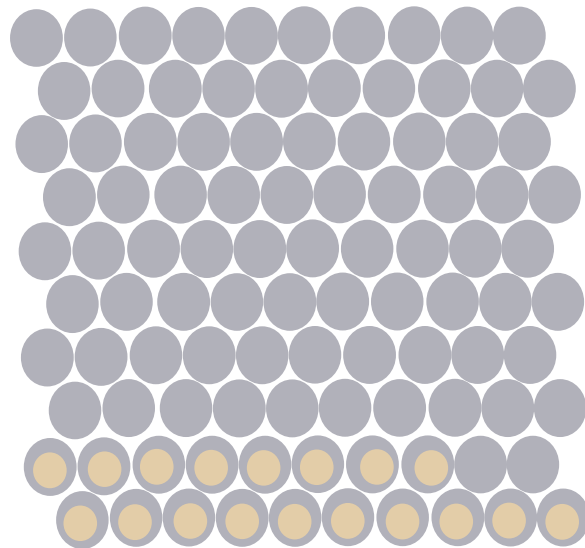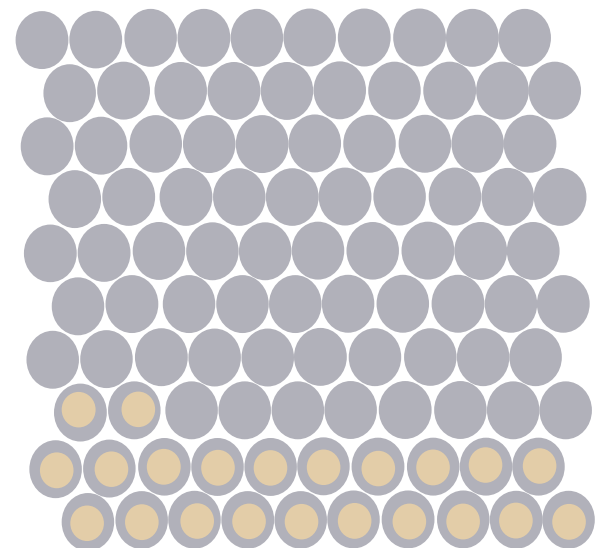

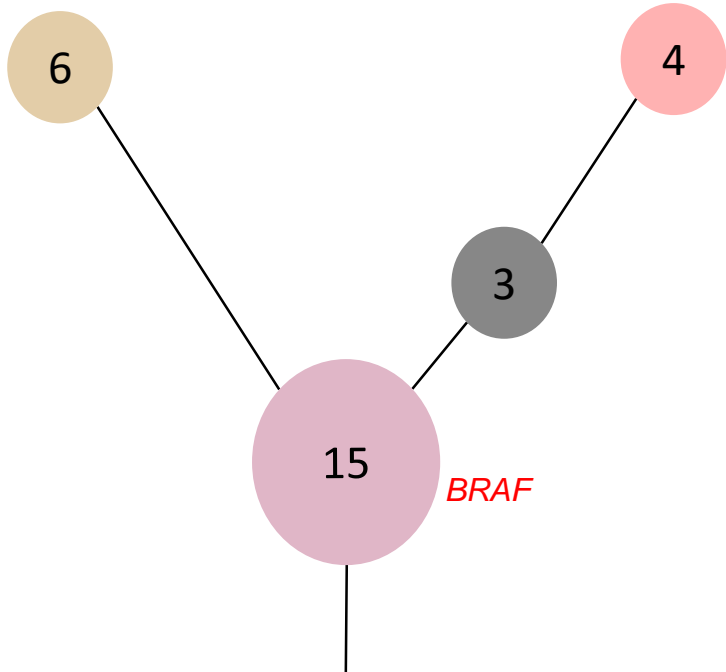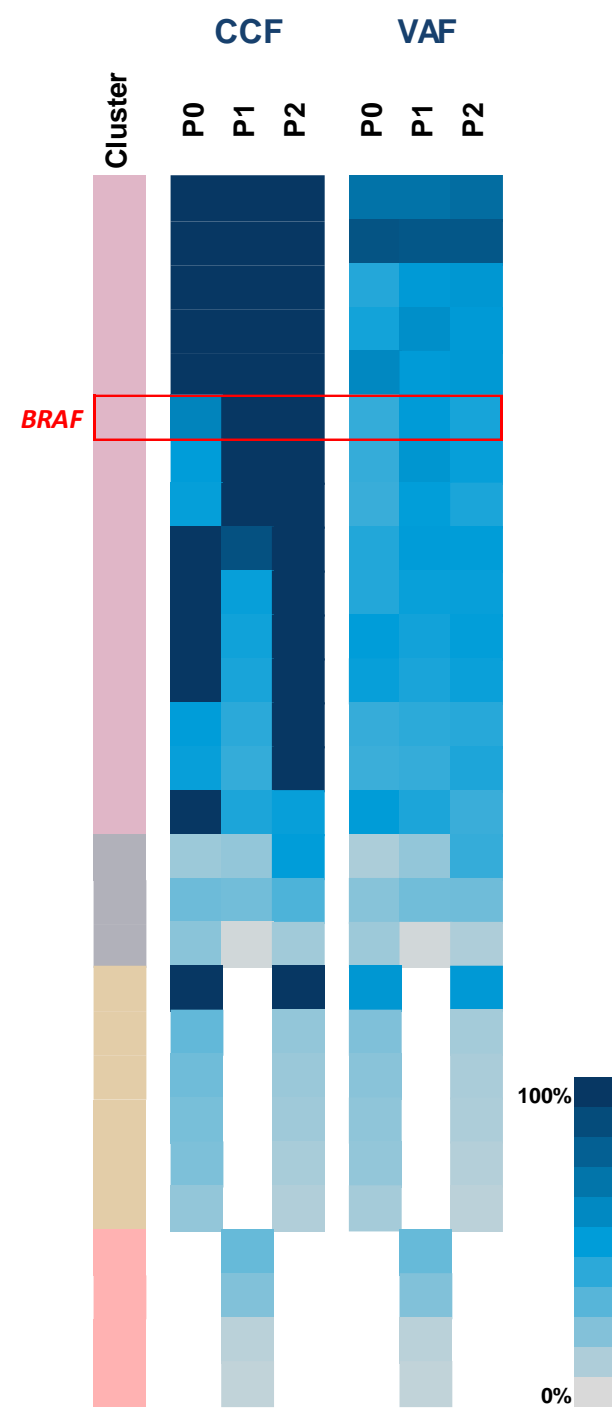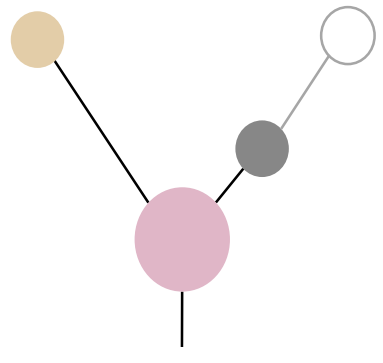

P0

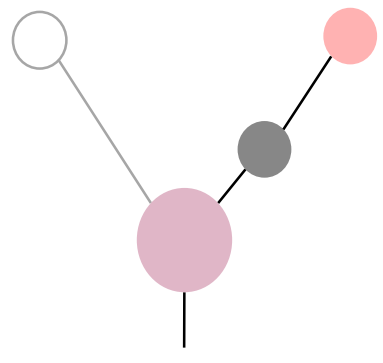

P1

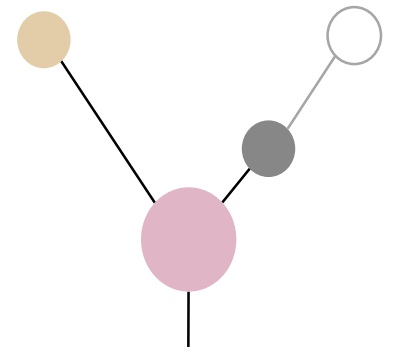

P2

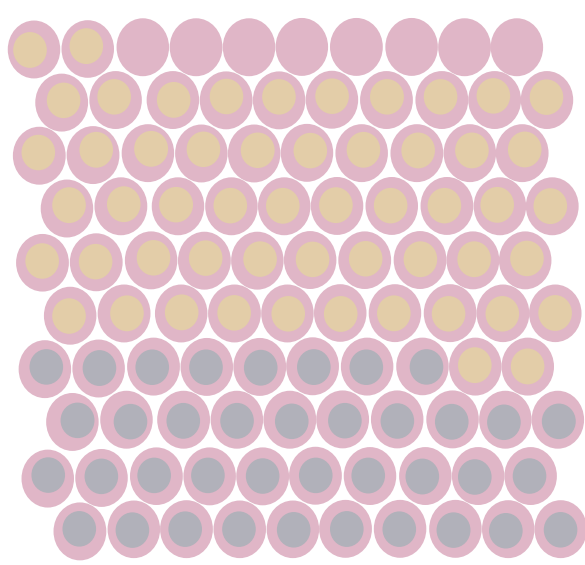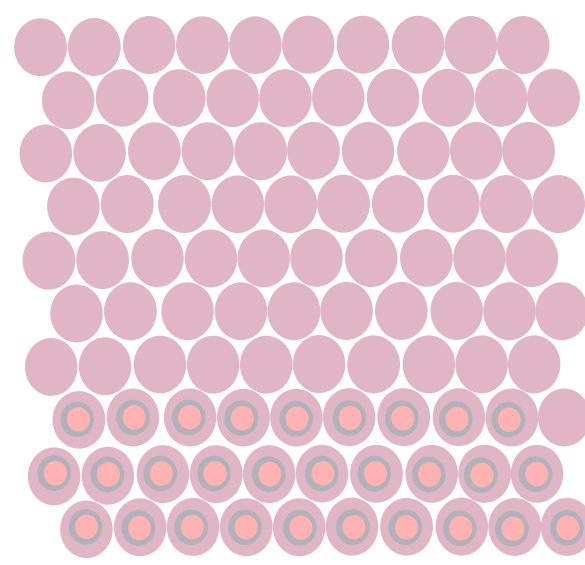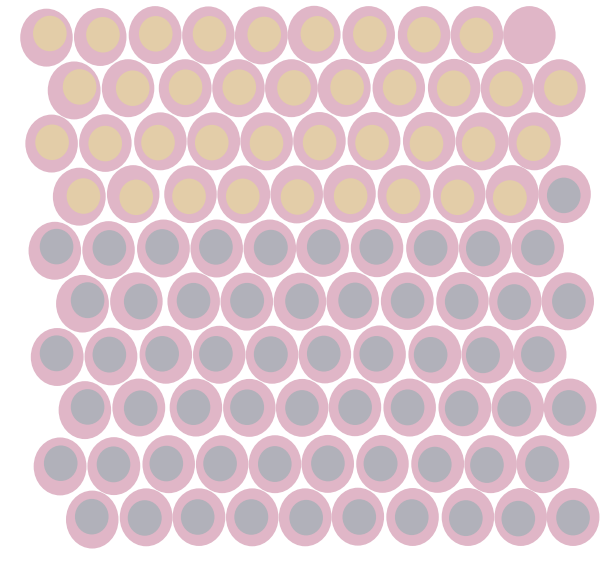



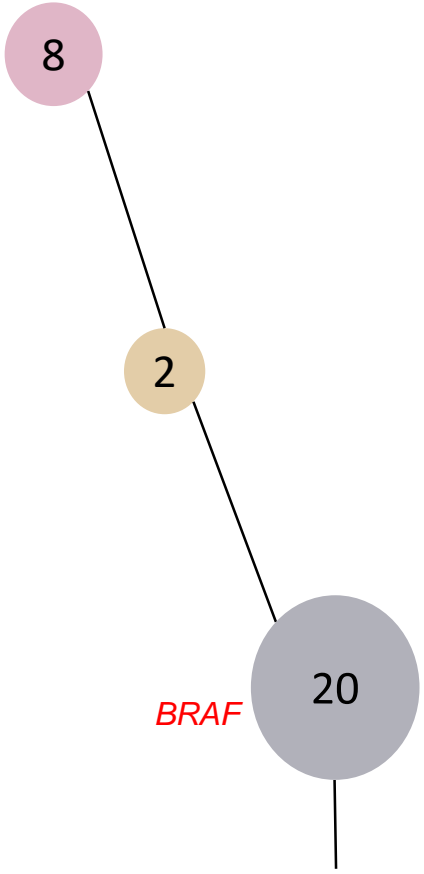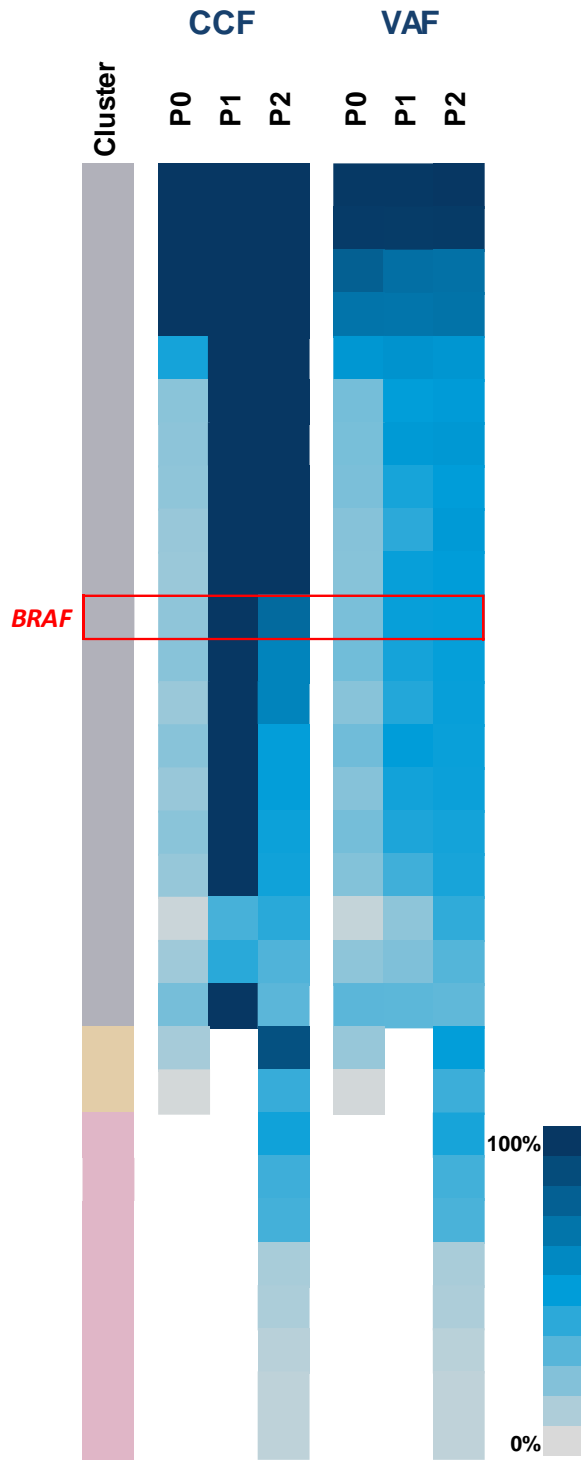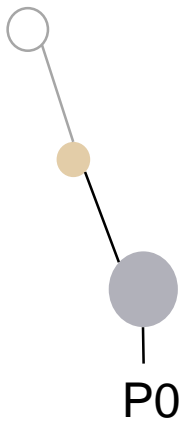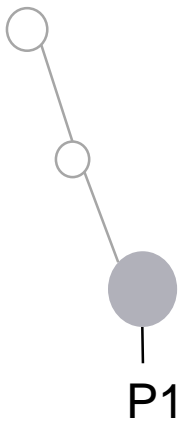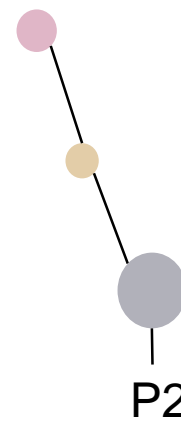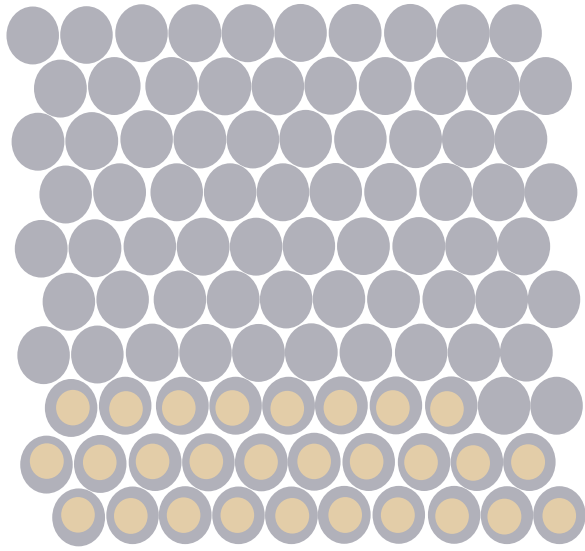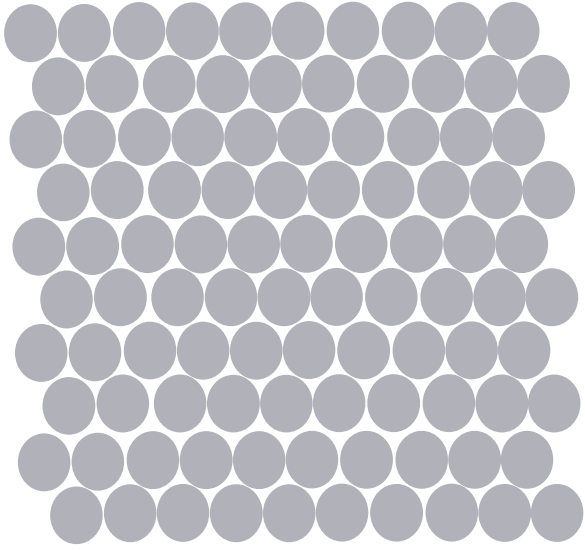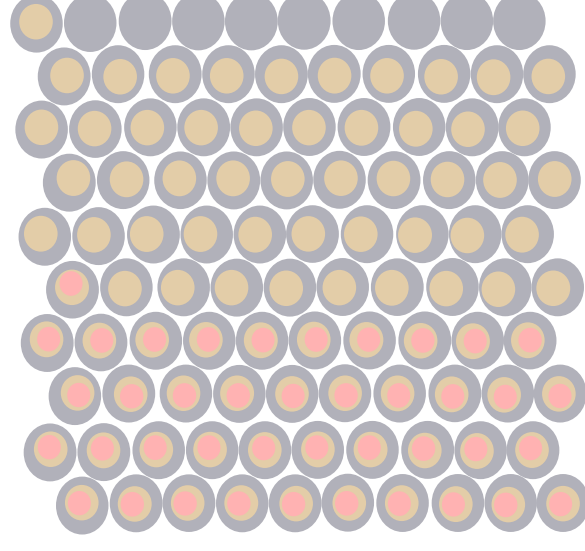

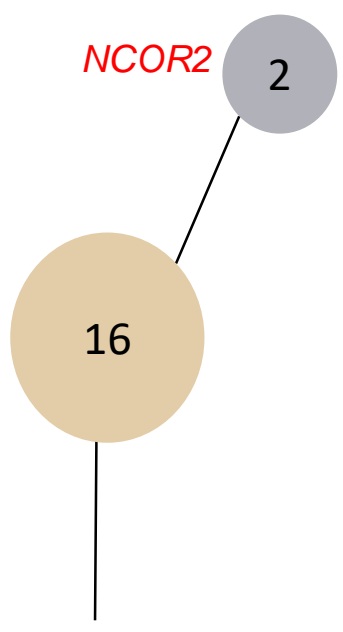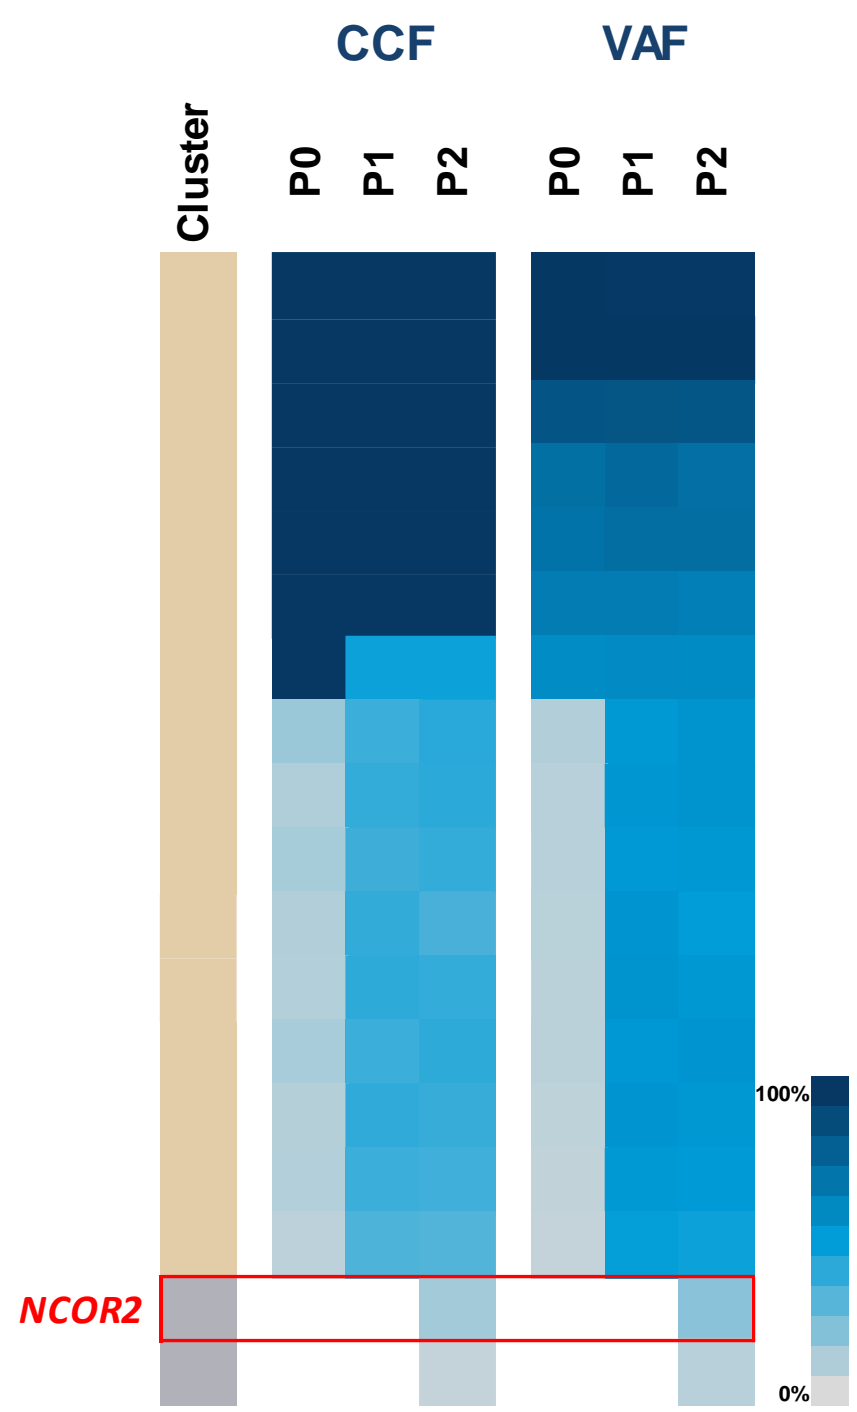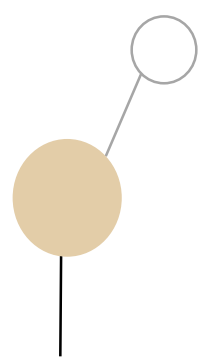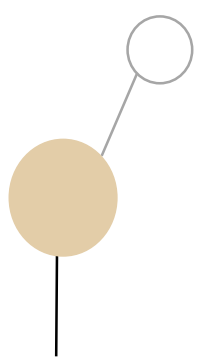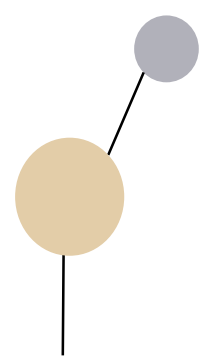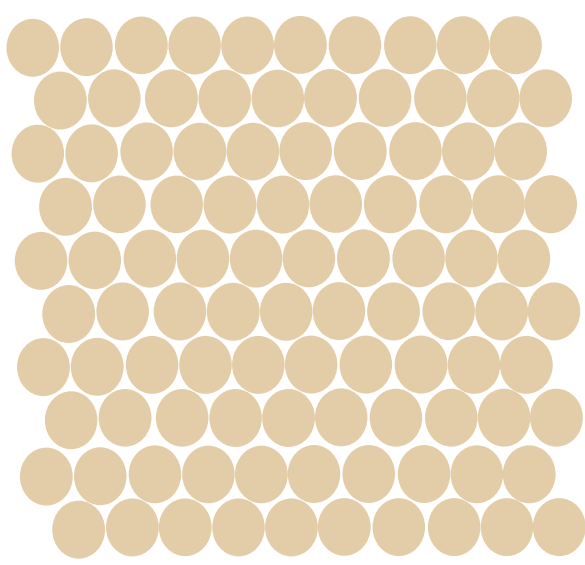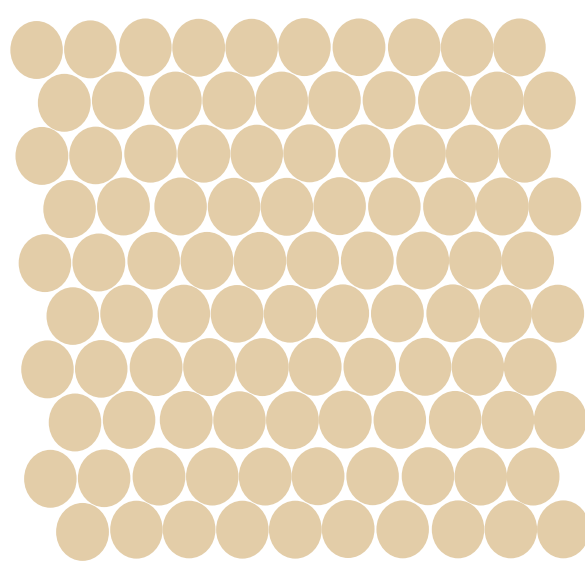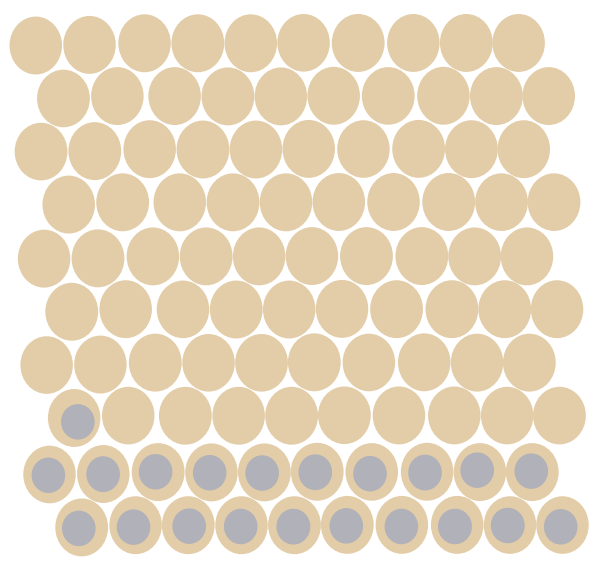

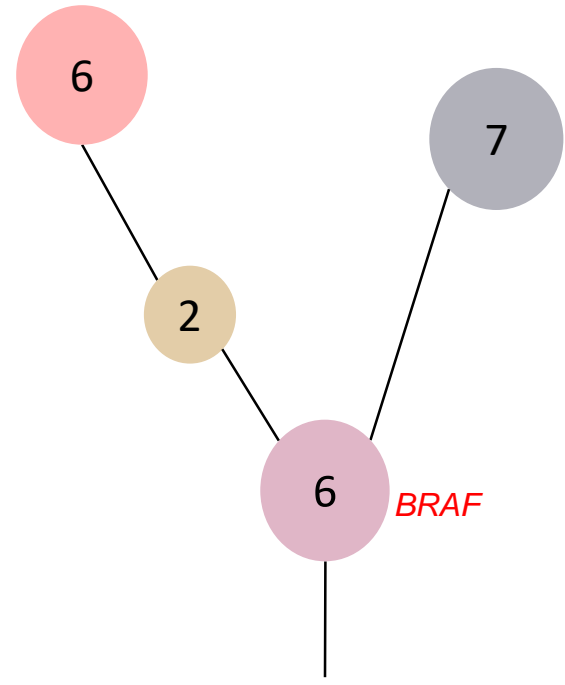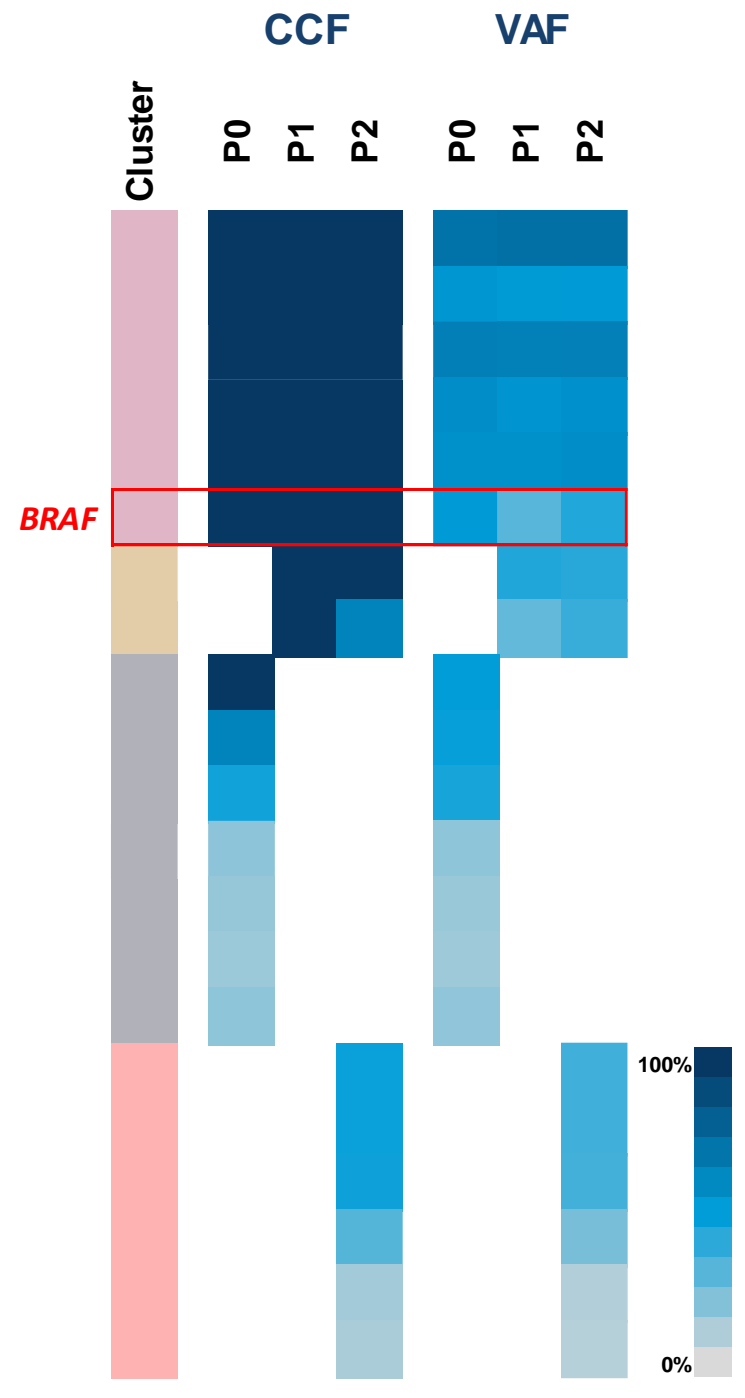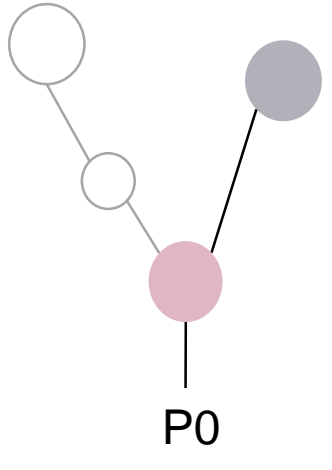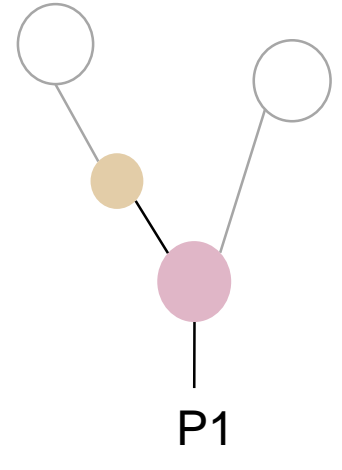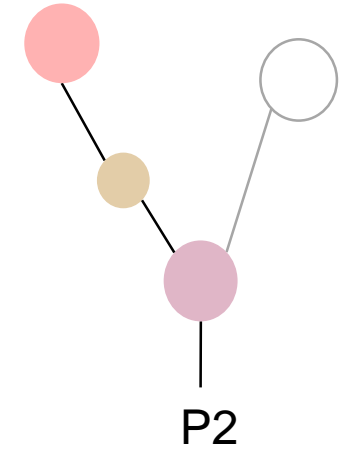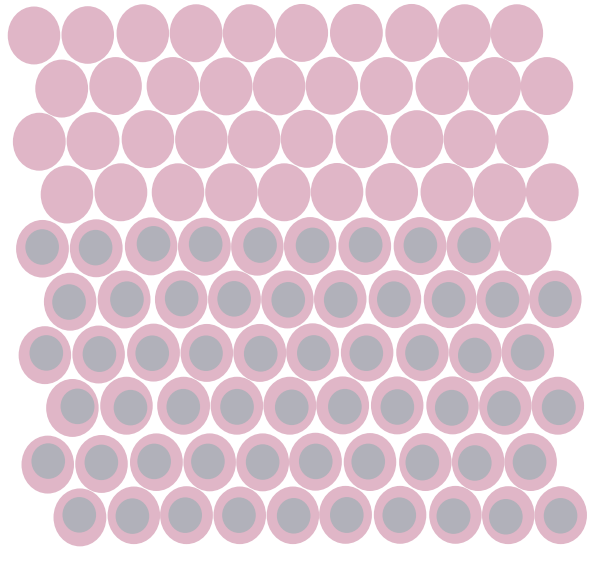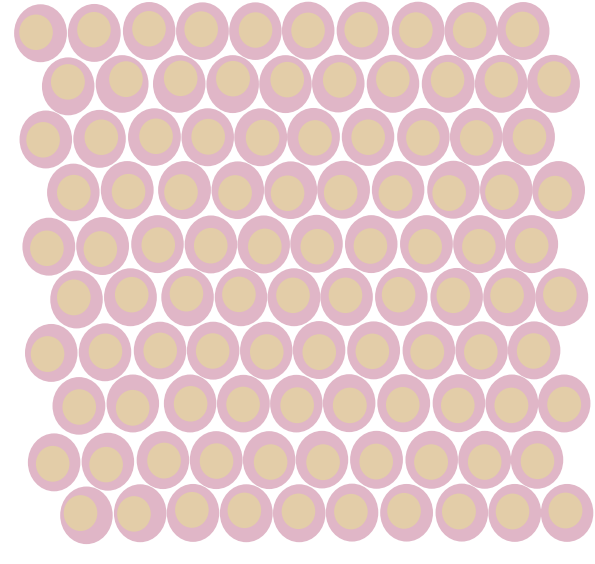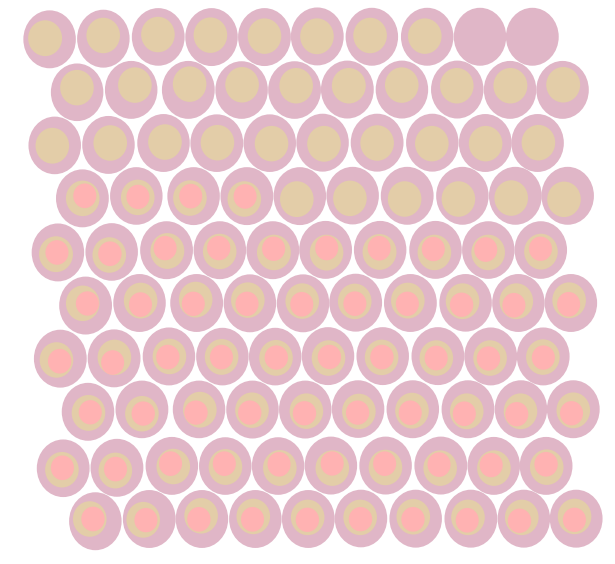

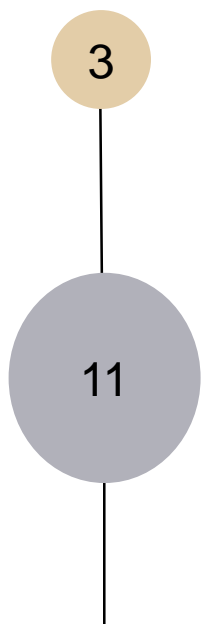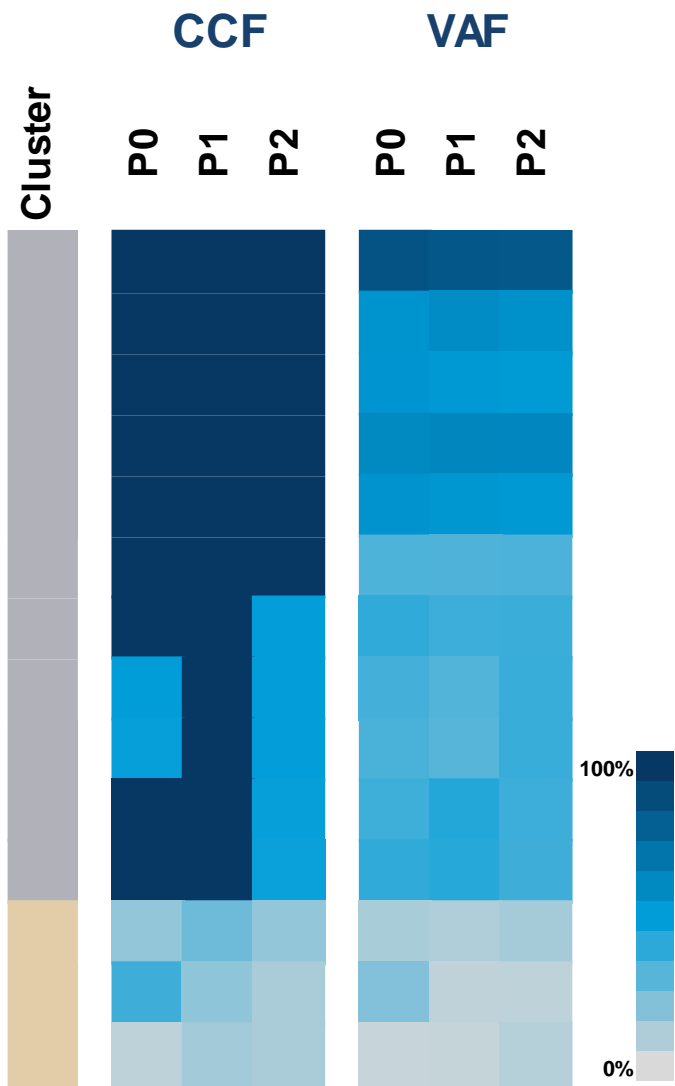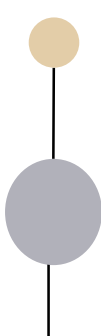

P0

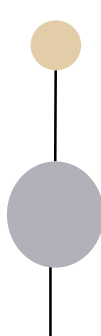

P1

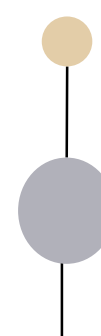

P2

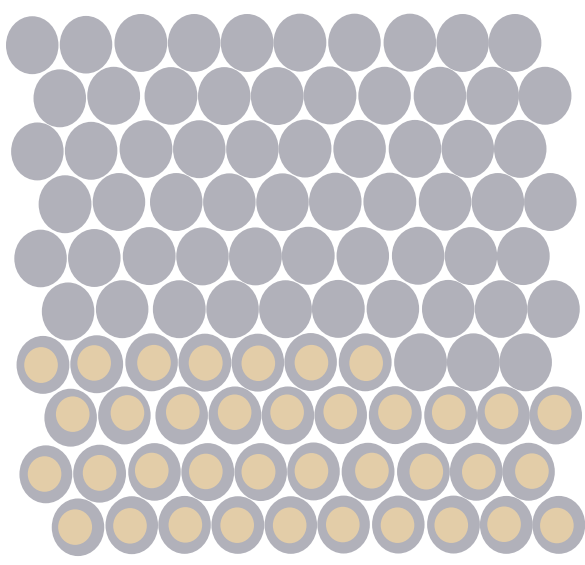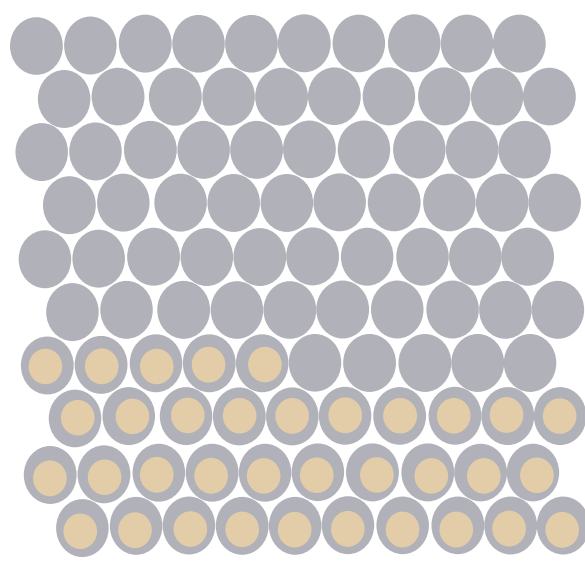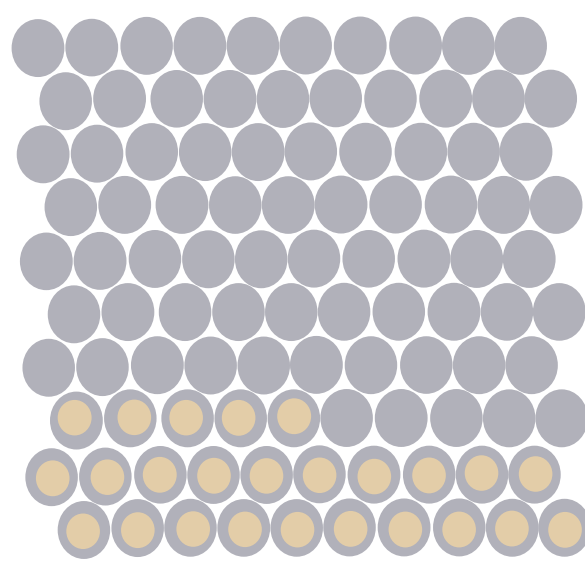

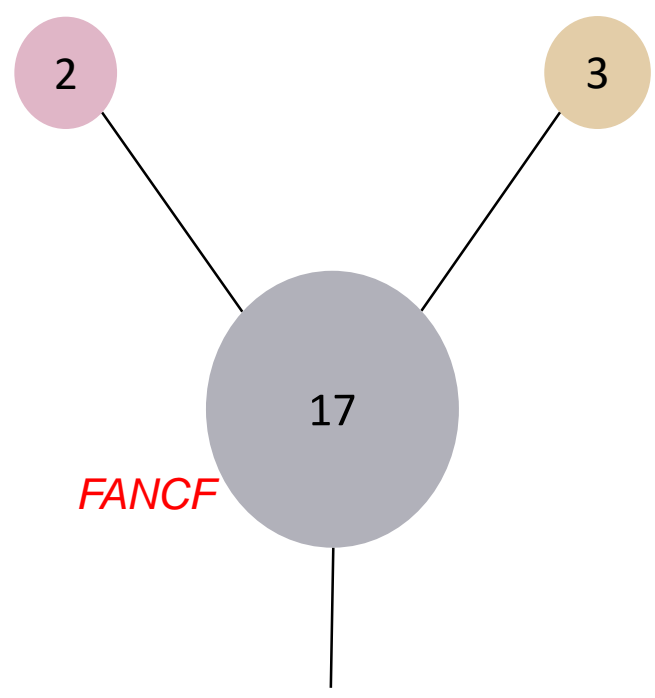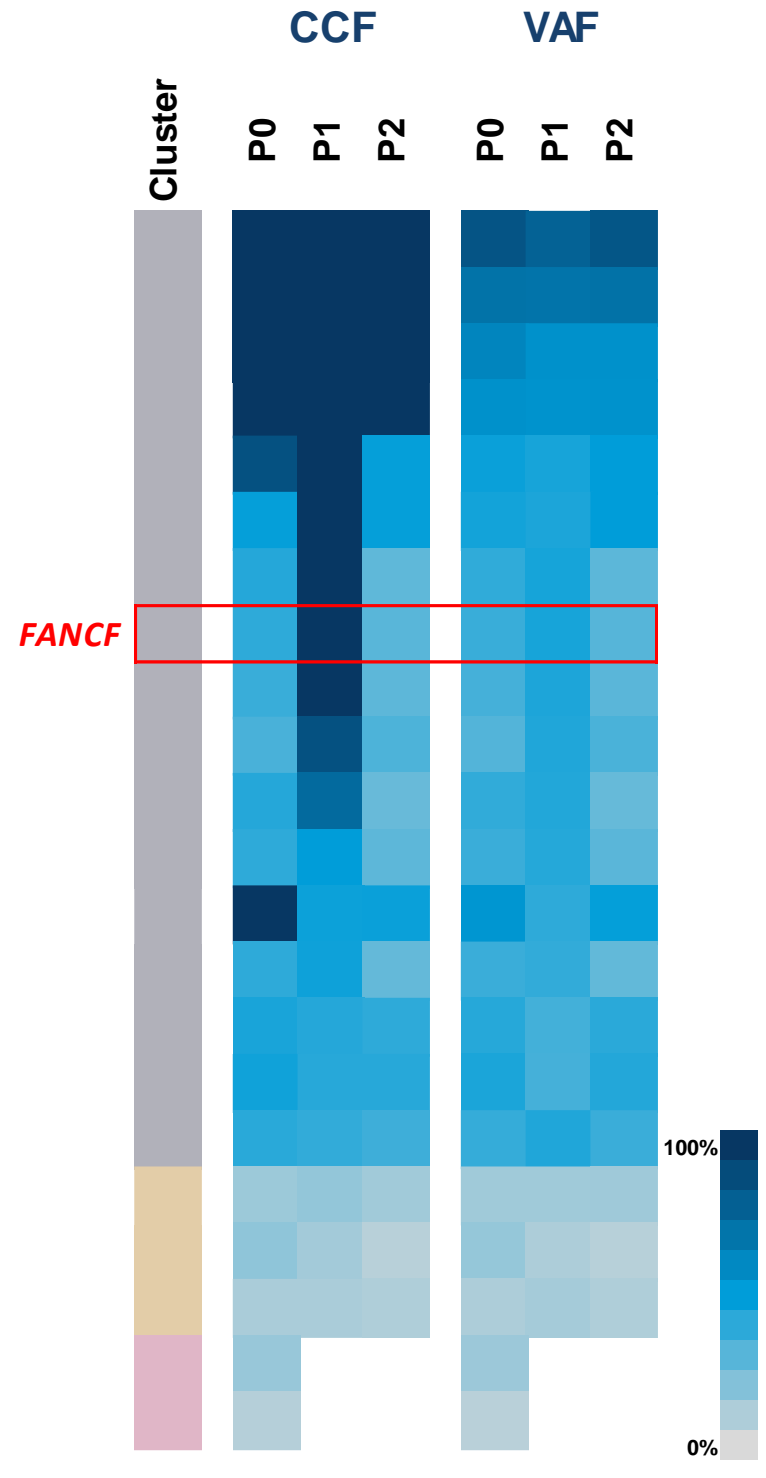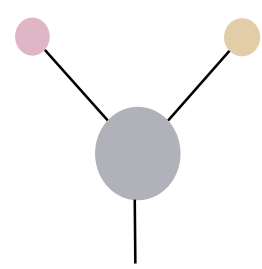

P0

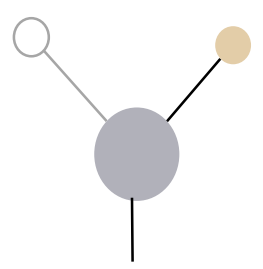

P1

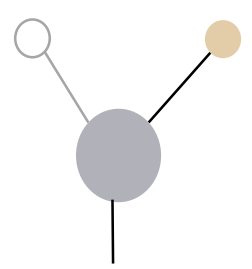

P2

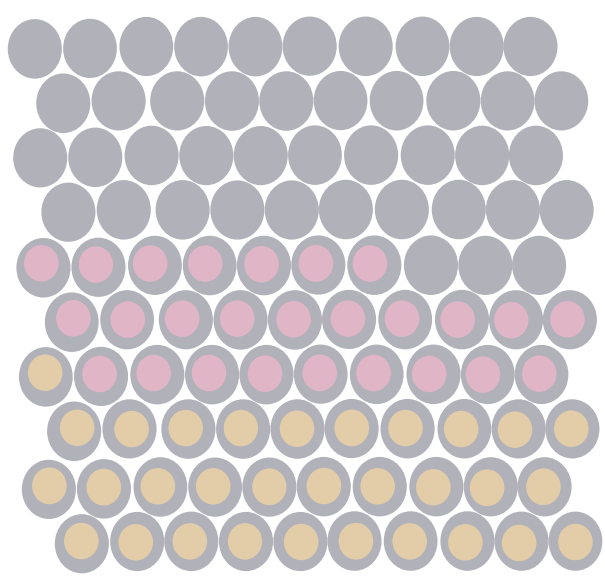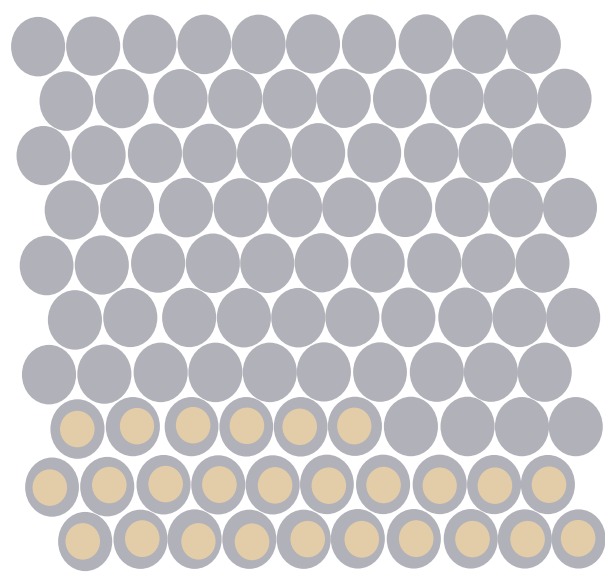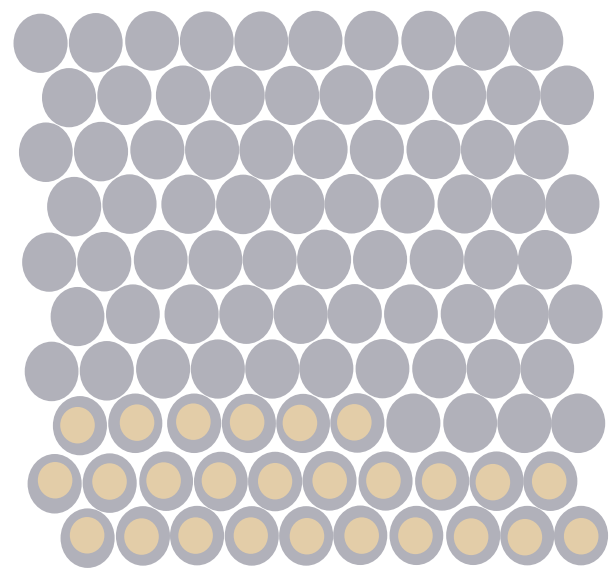

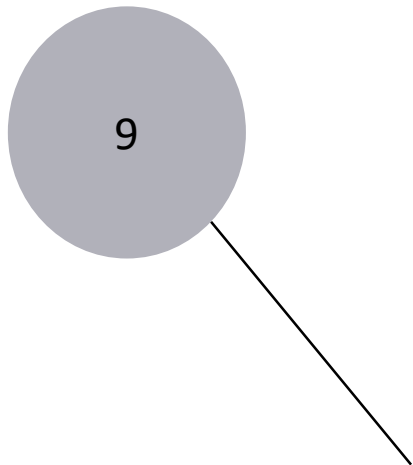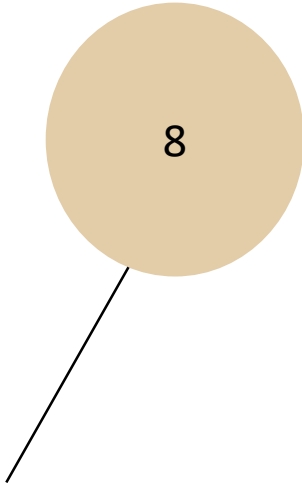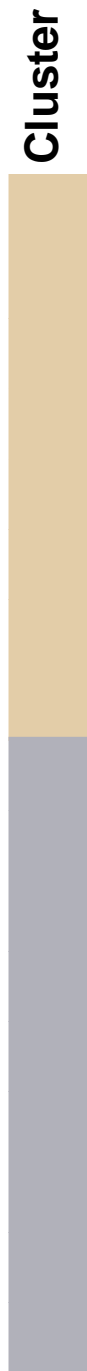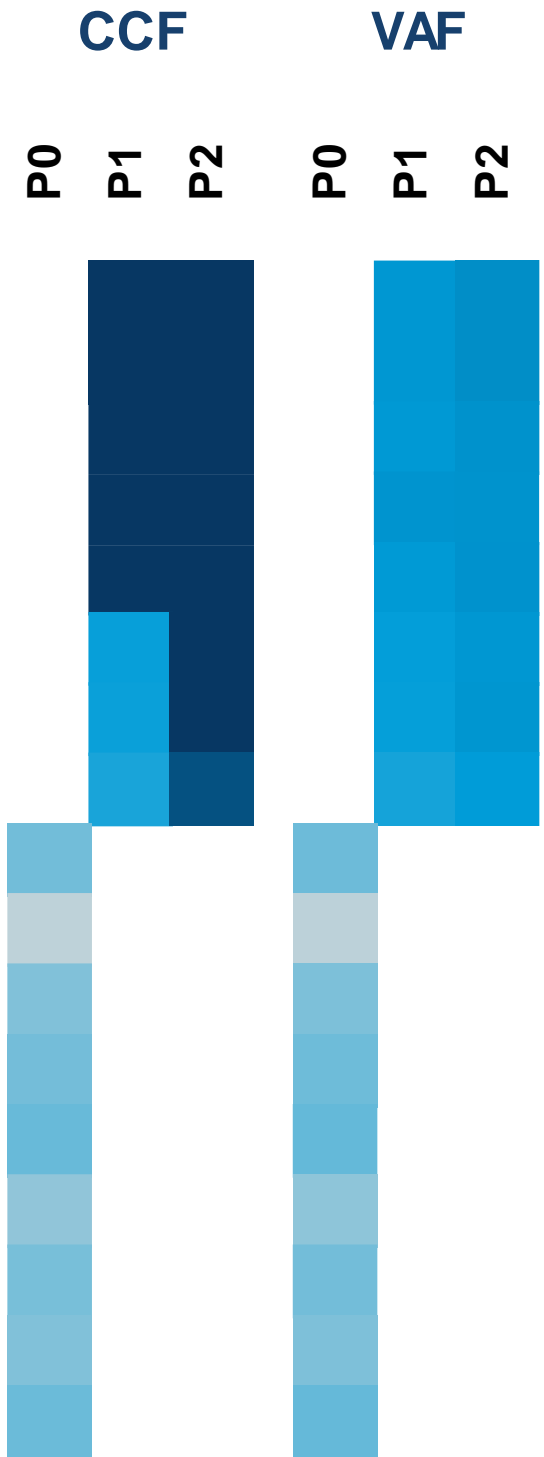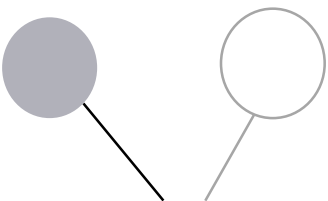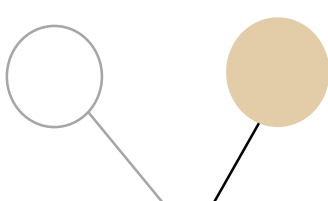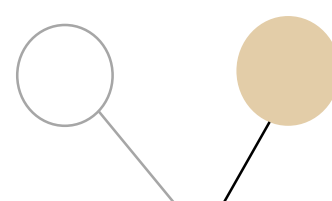

P0

P1

P2

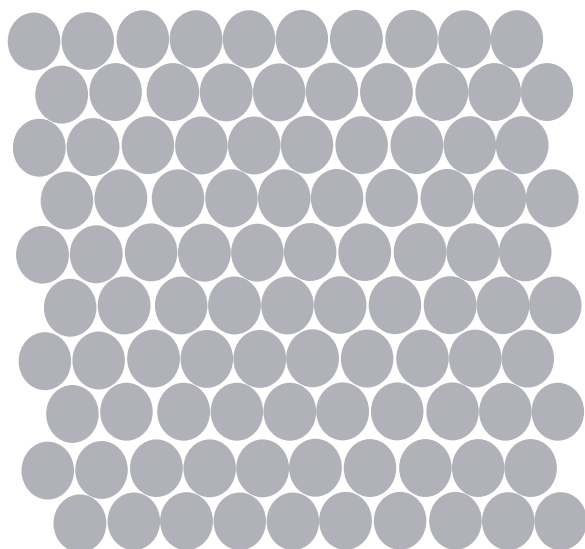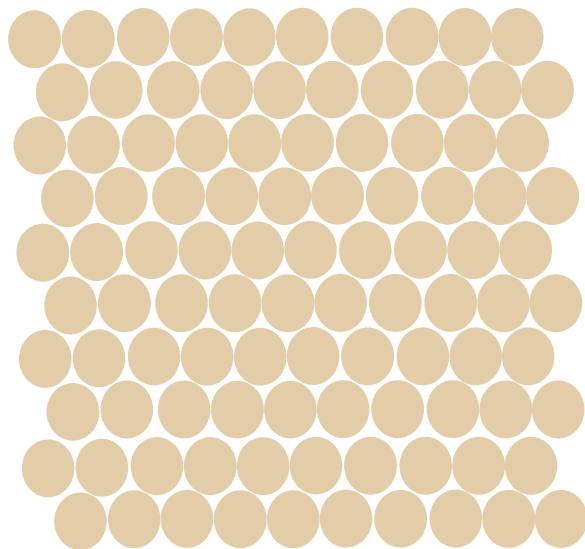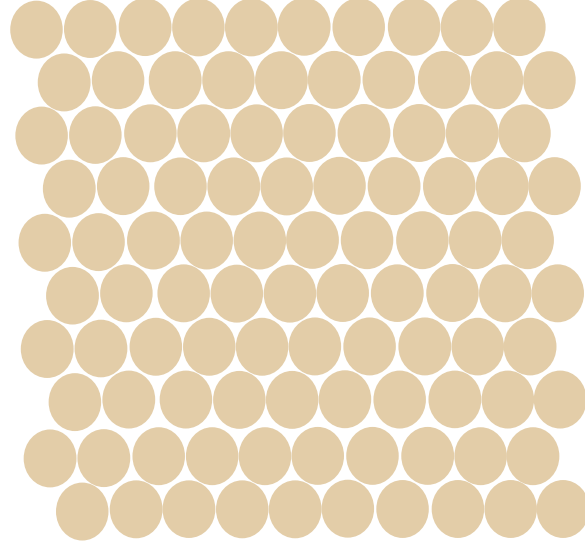

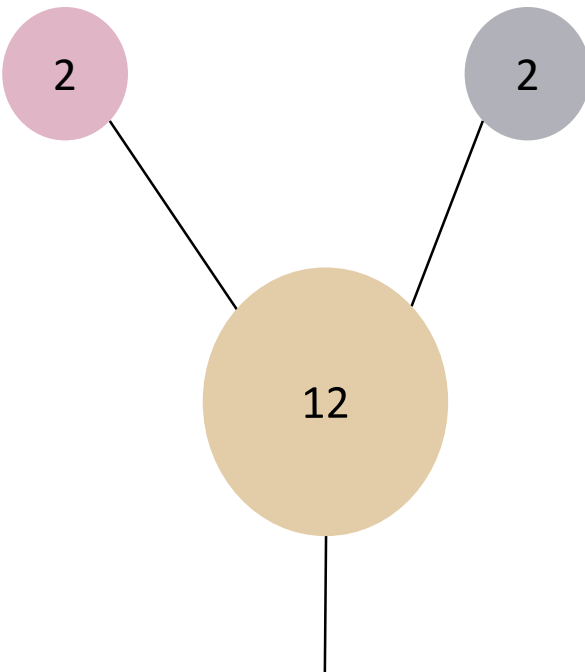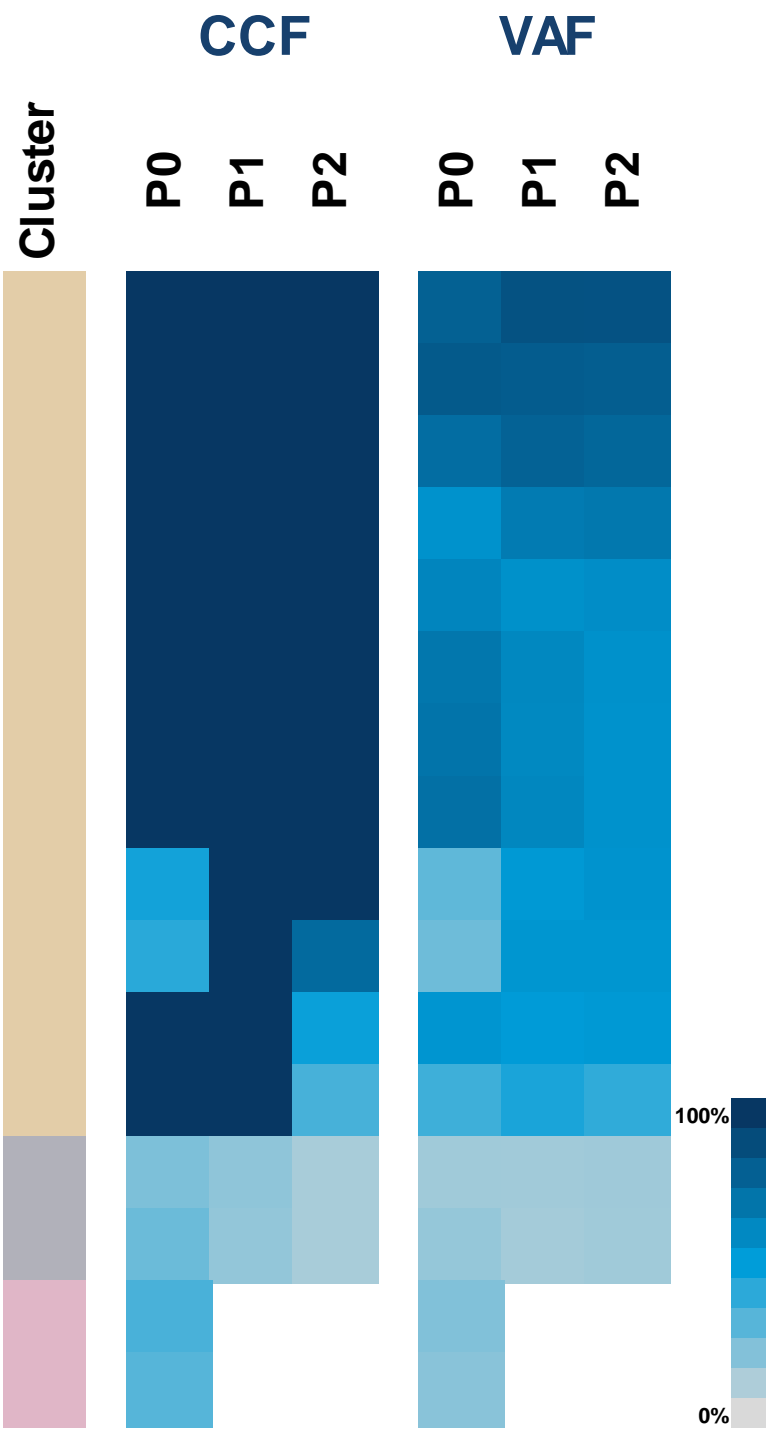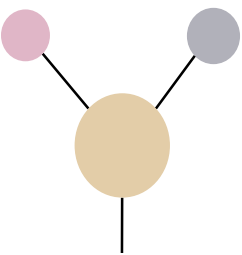

P0

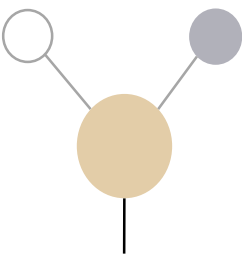

P1

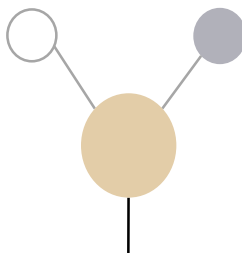

P2

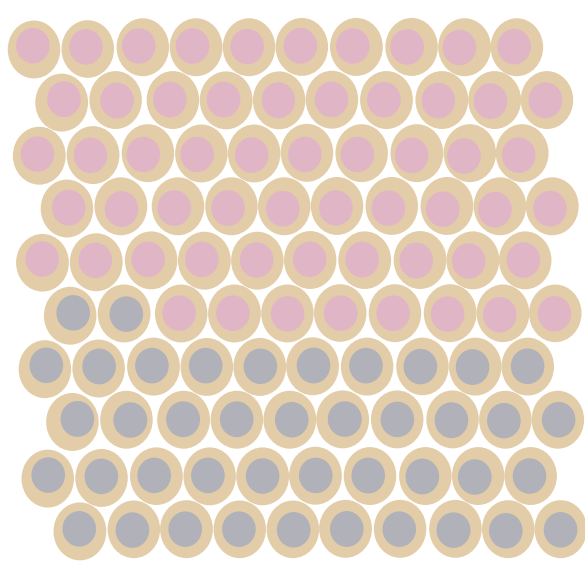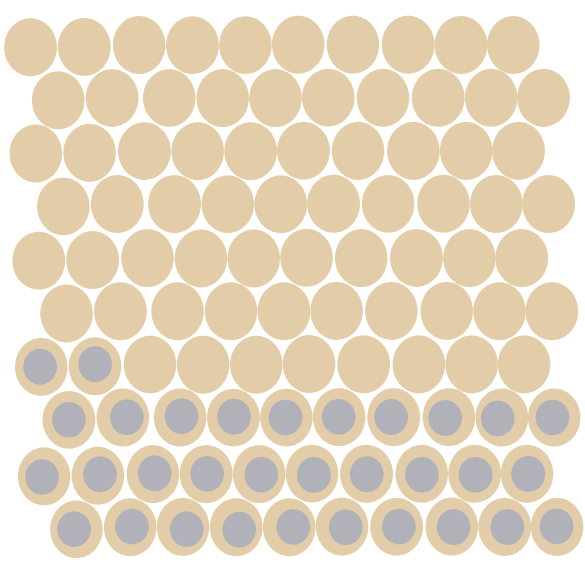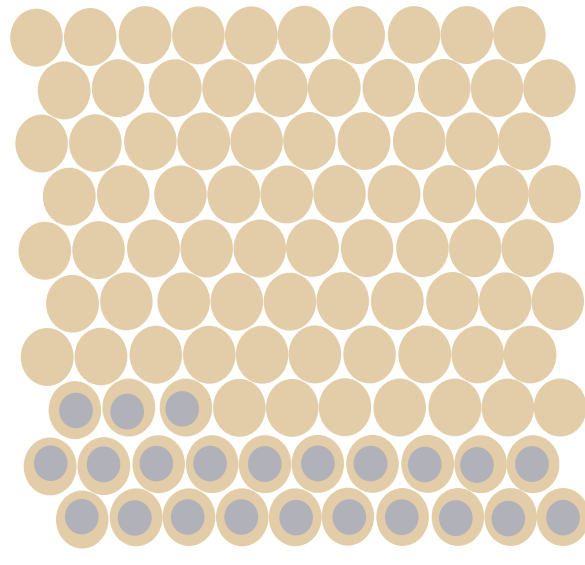

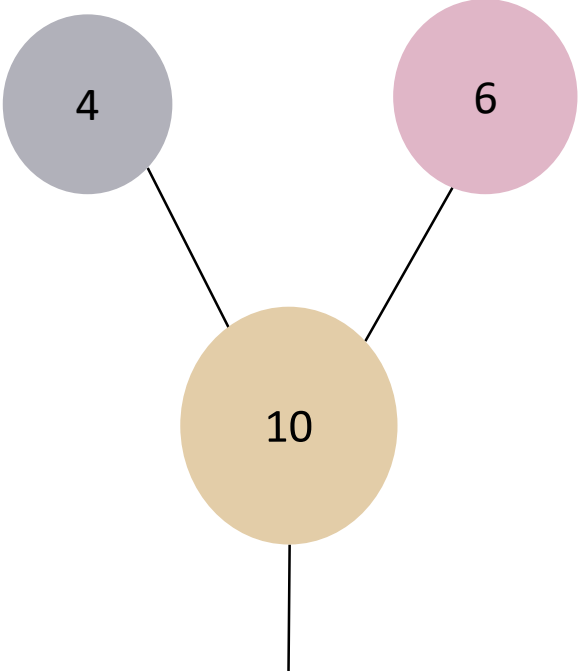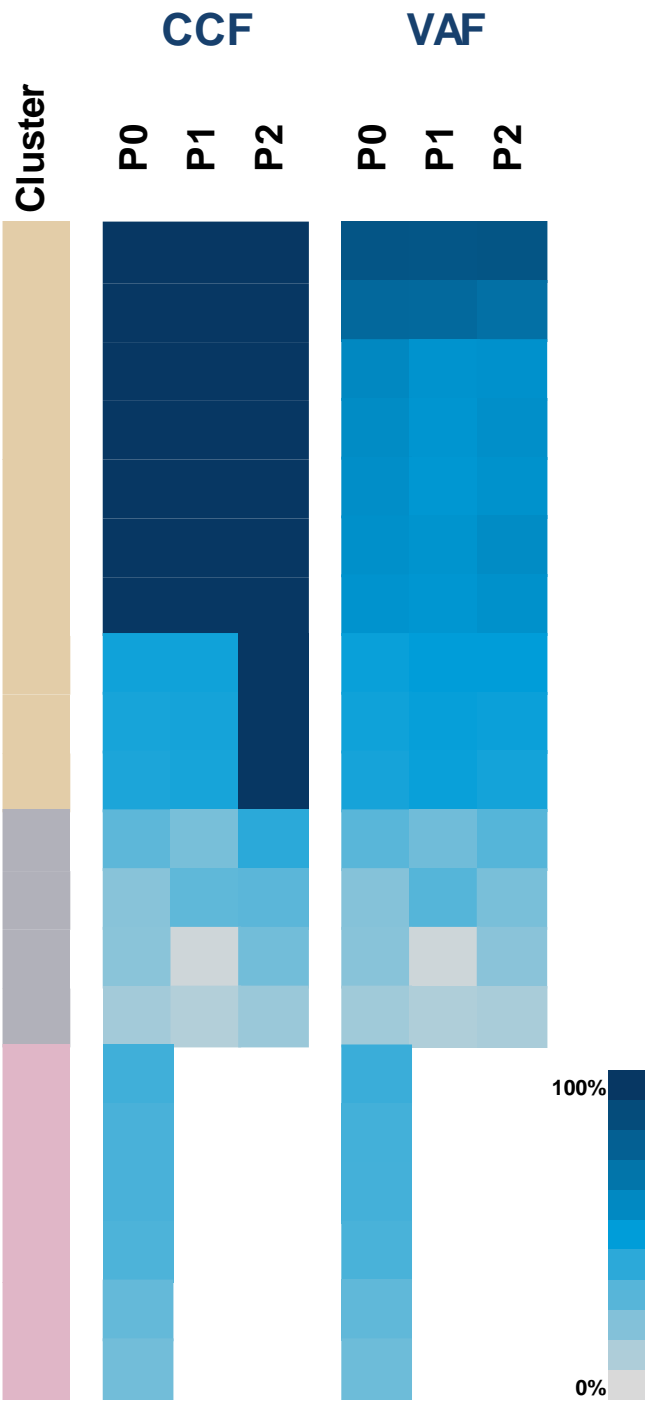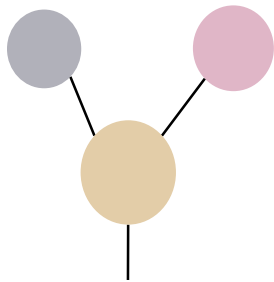

P0

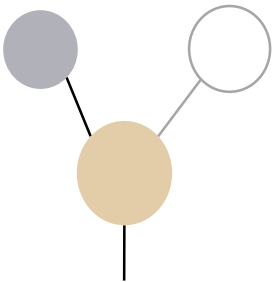

P1

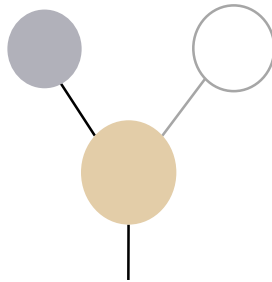

P2

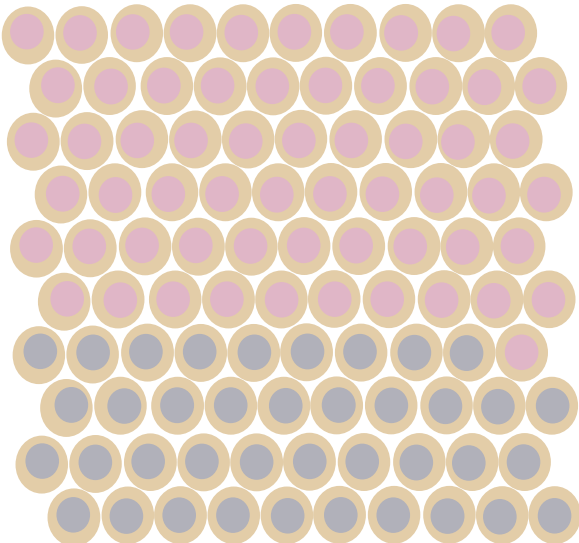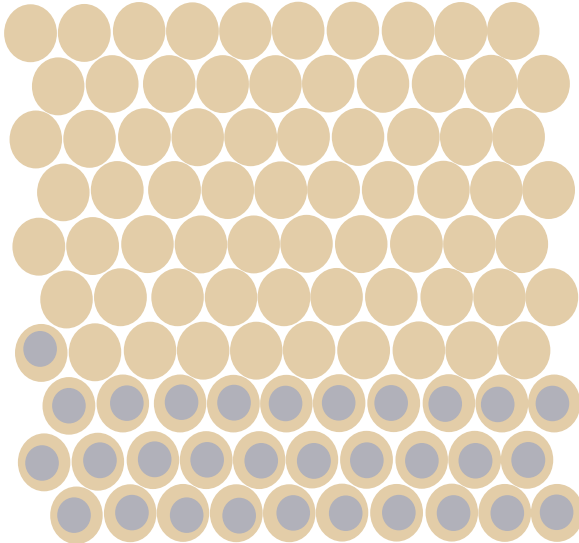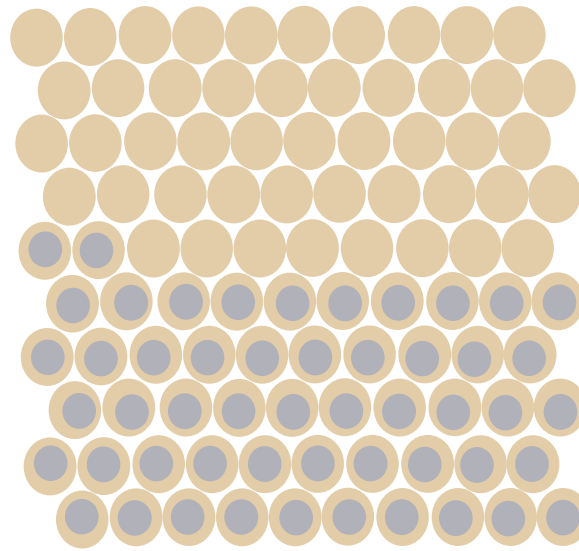



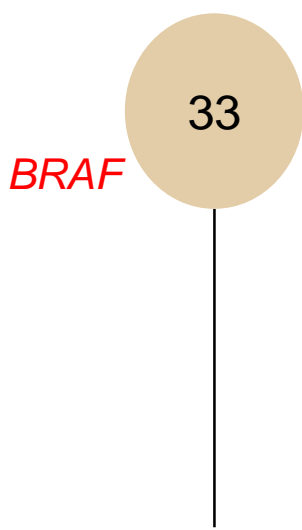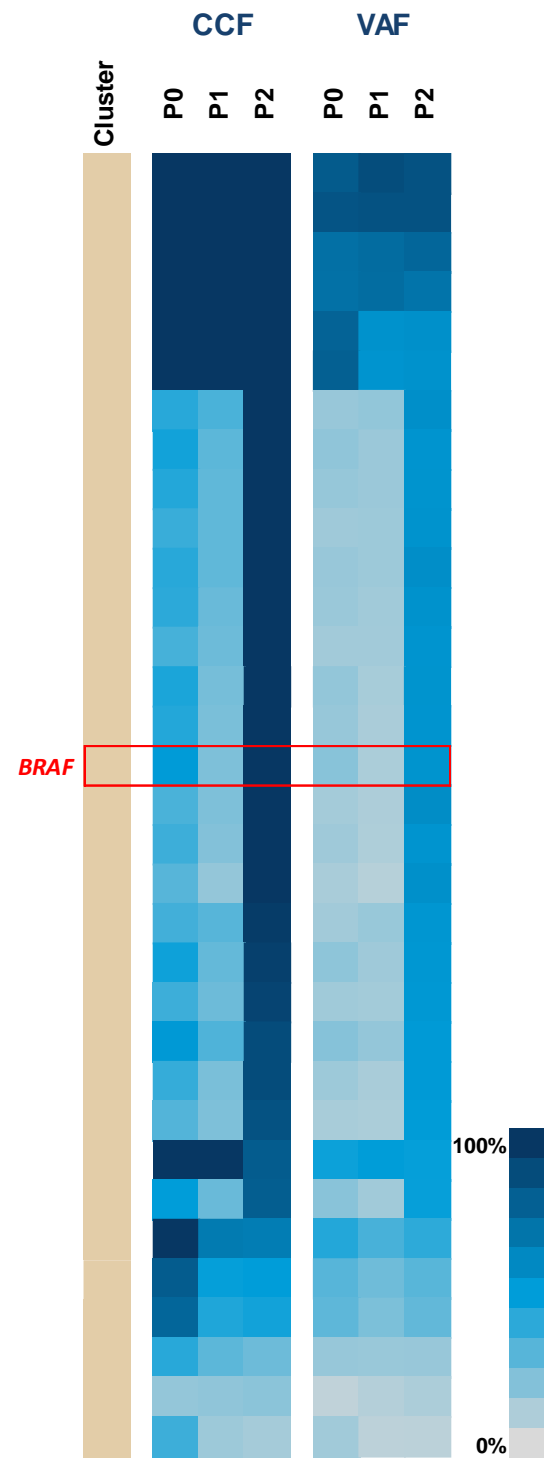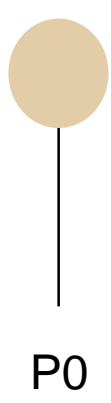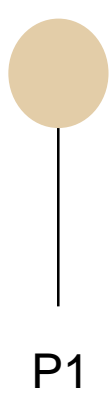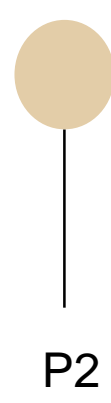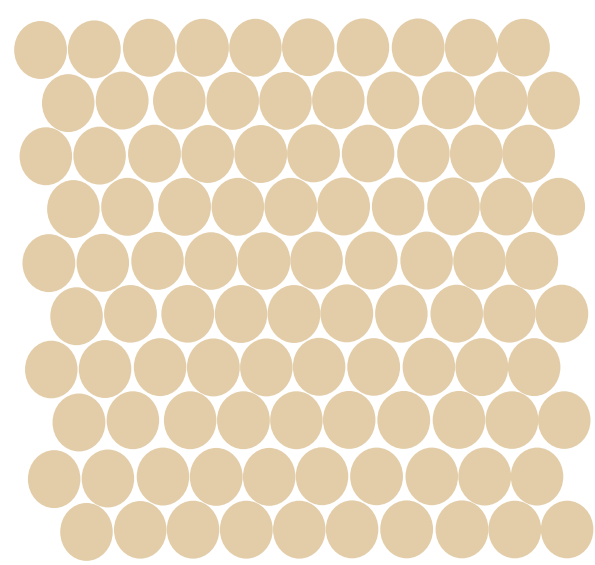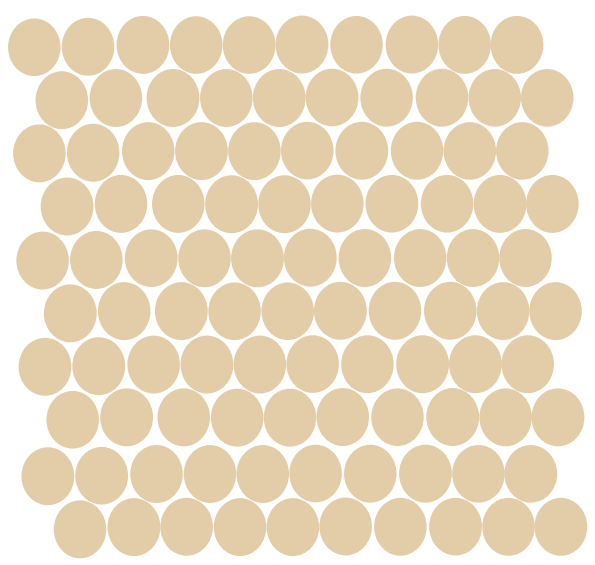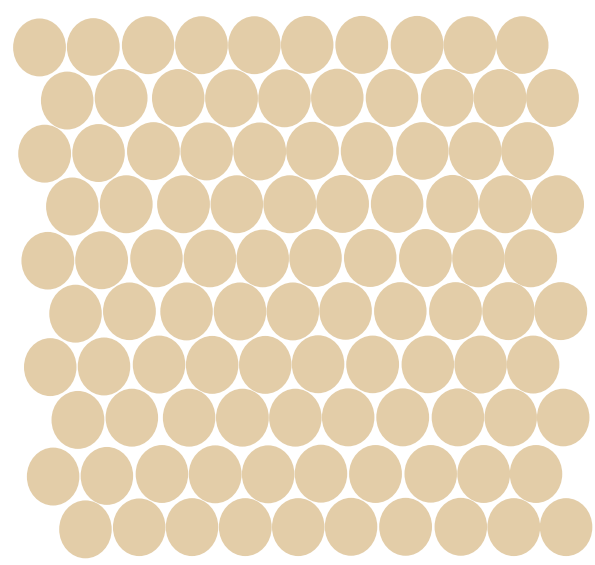

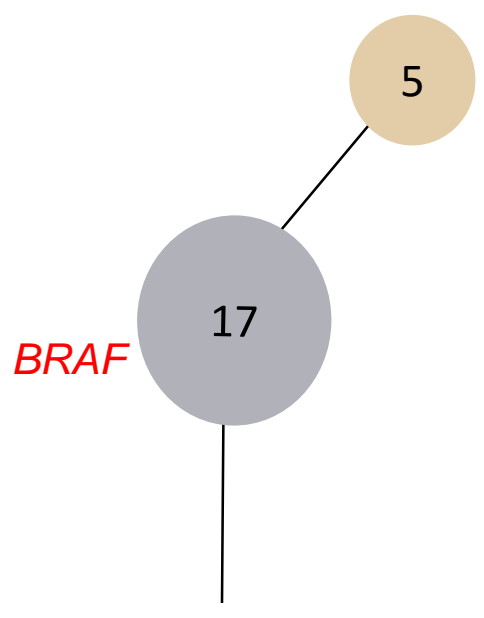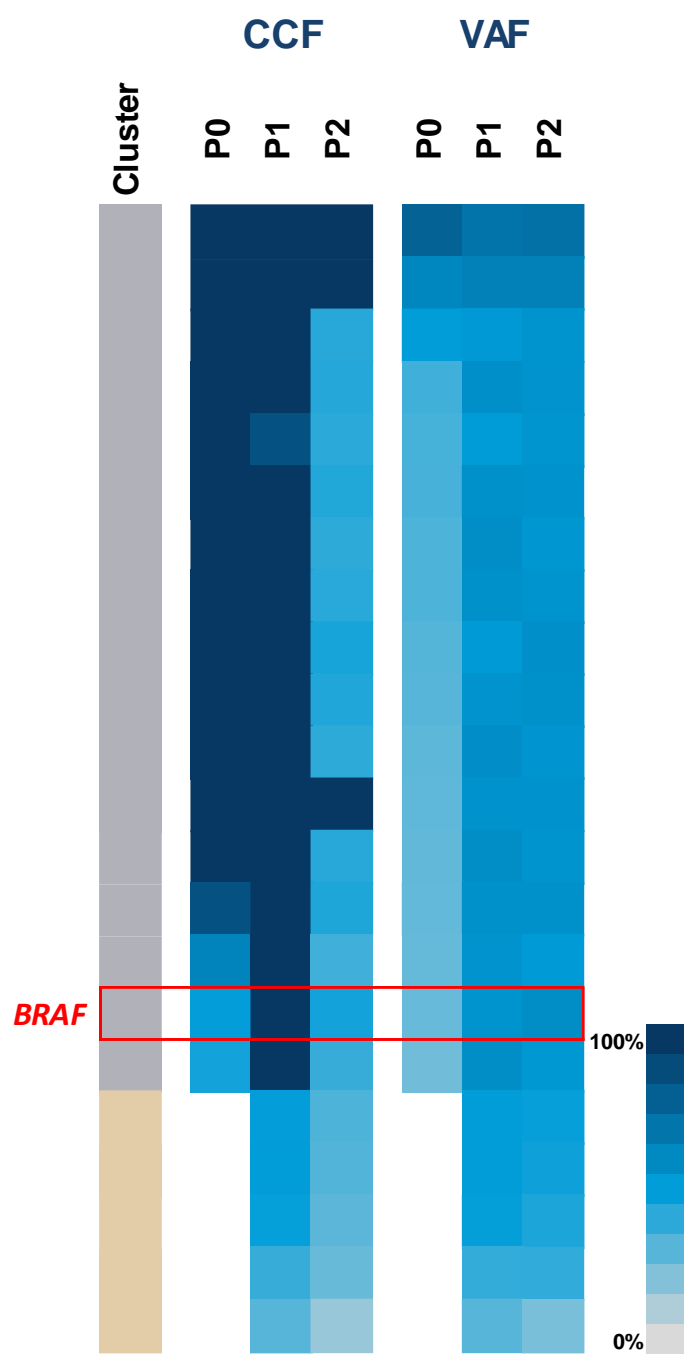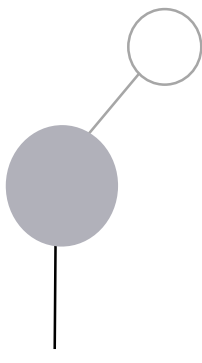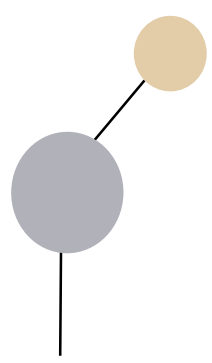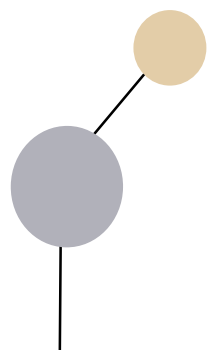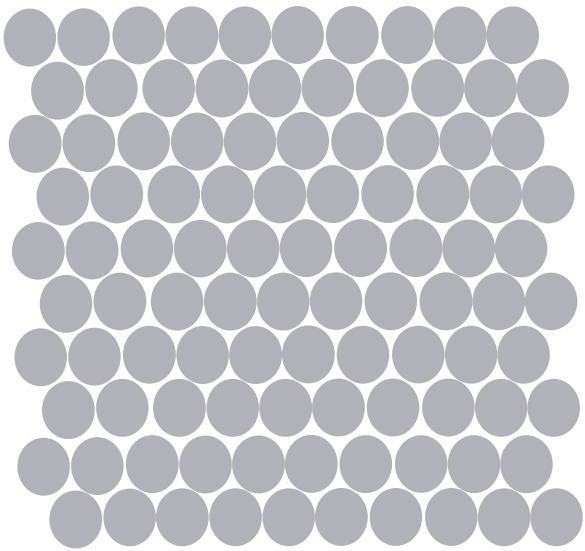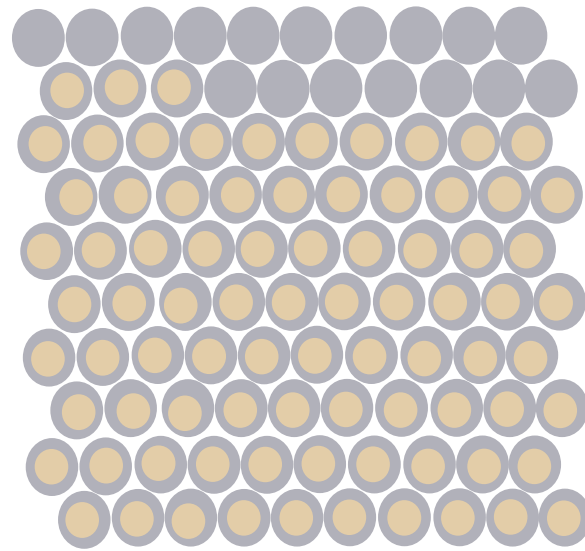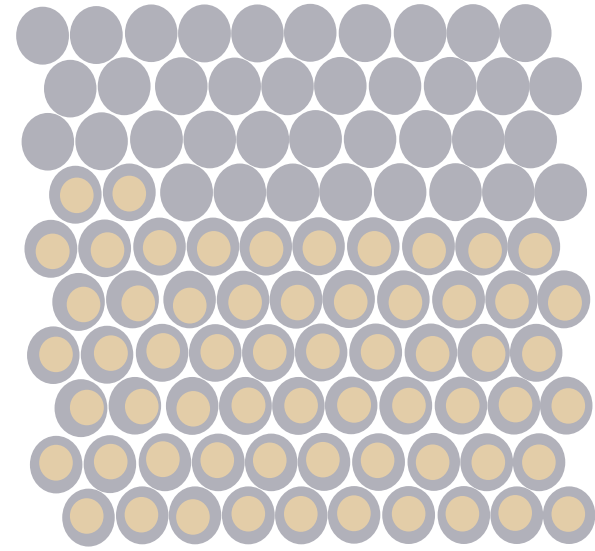

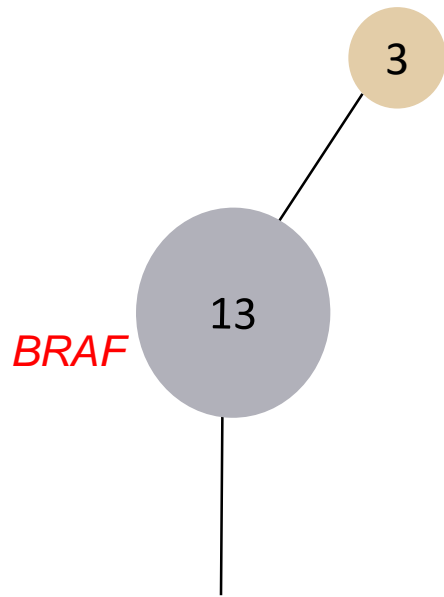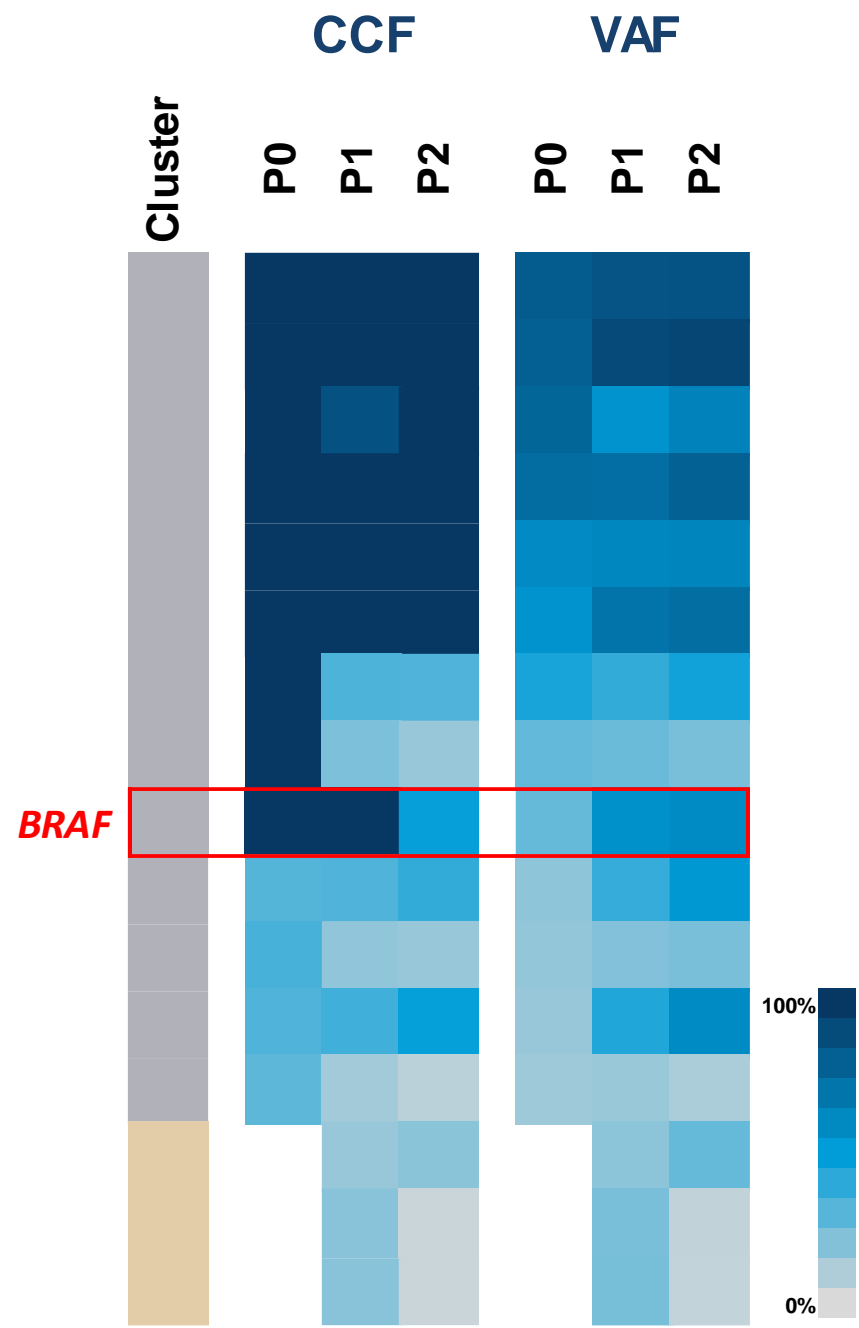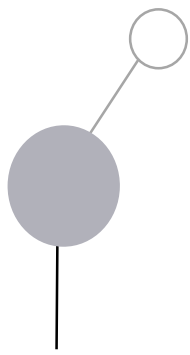

P0

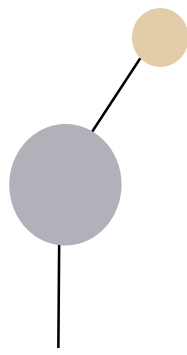

P1

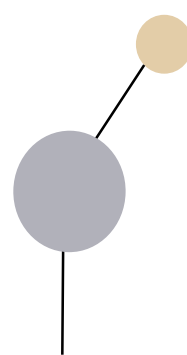

P2

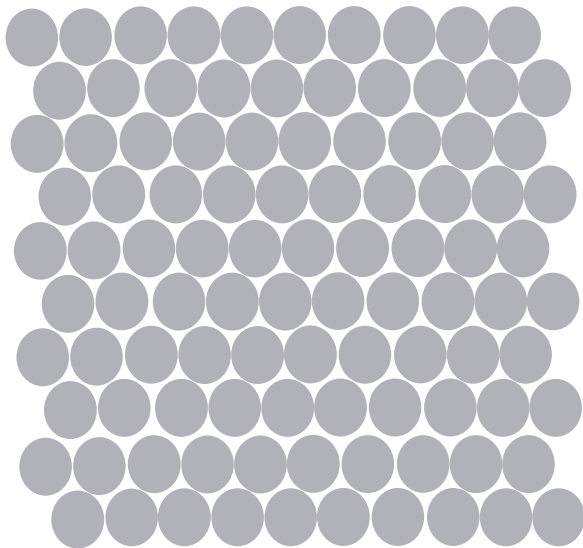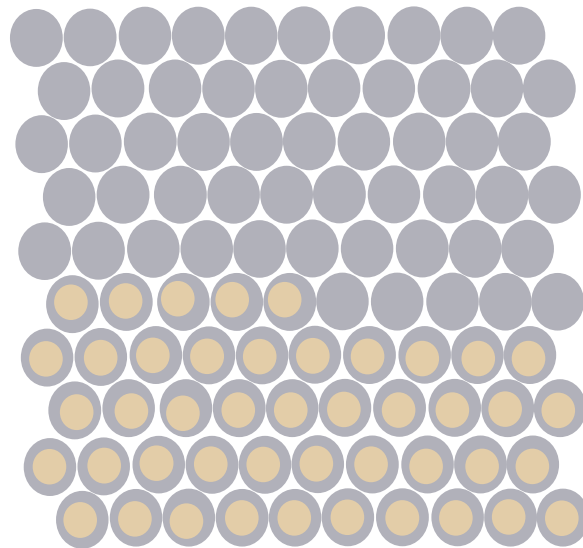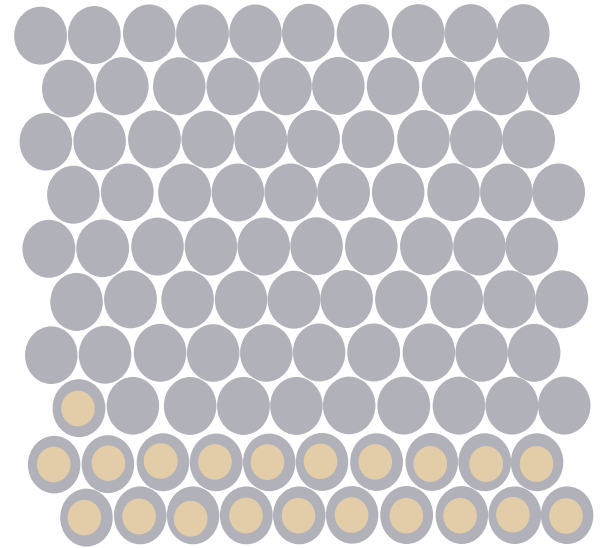

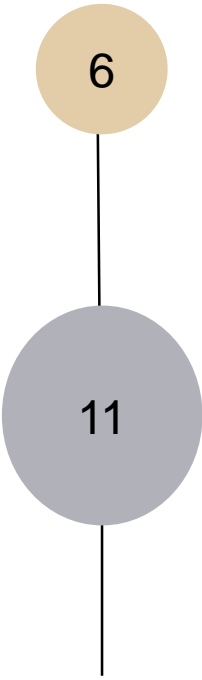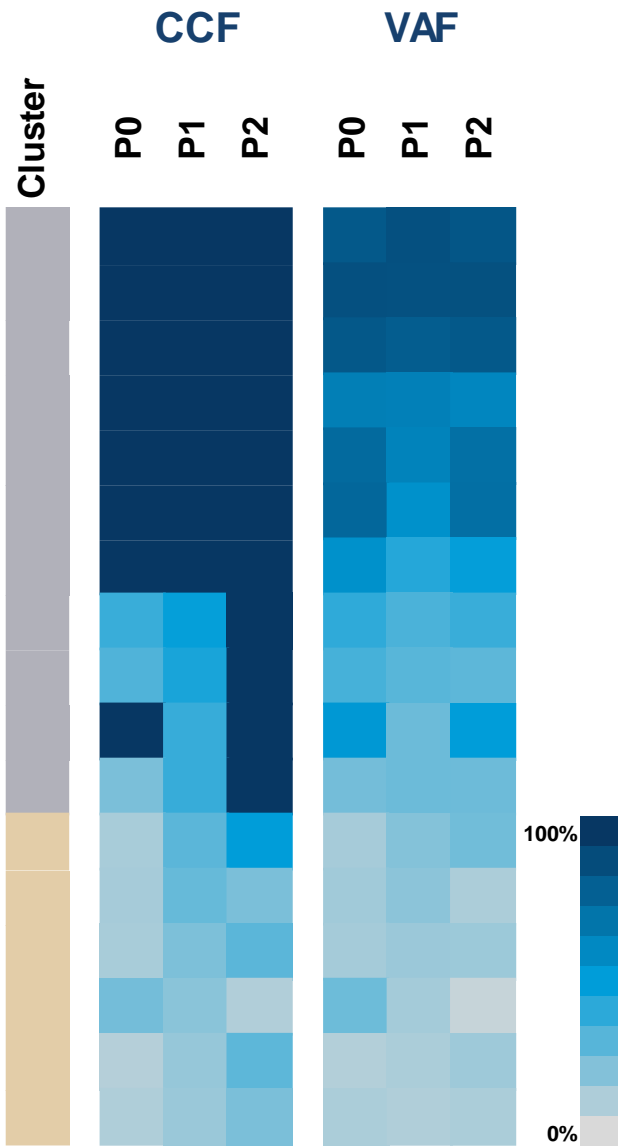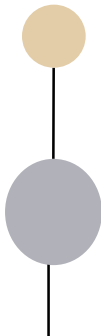

P0

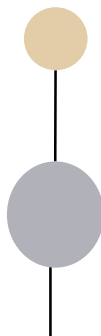

P1

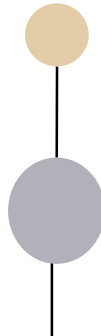

P2

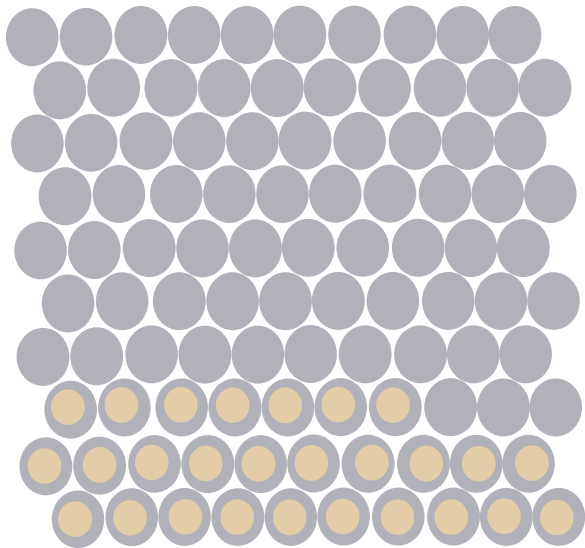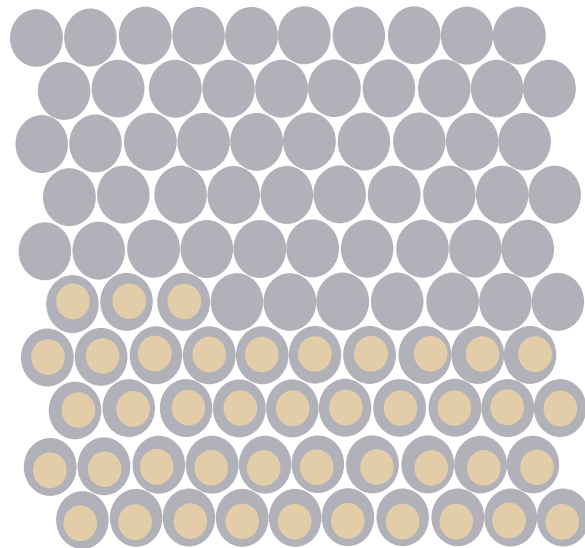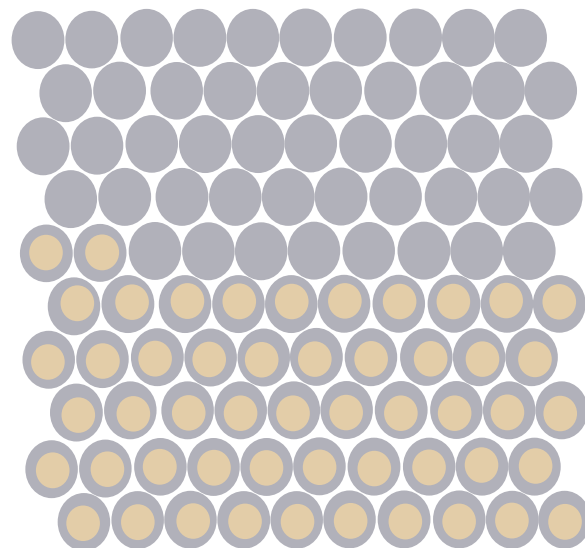

CCF

VAF

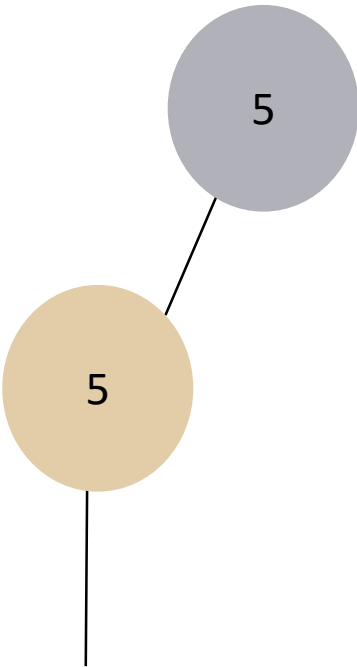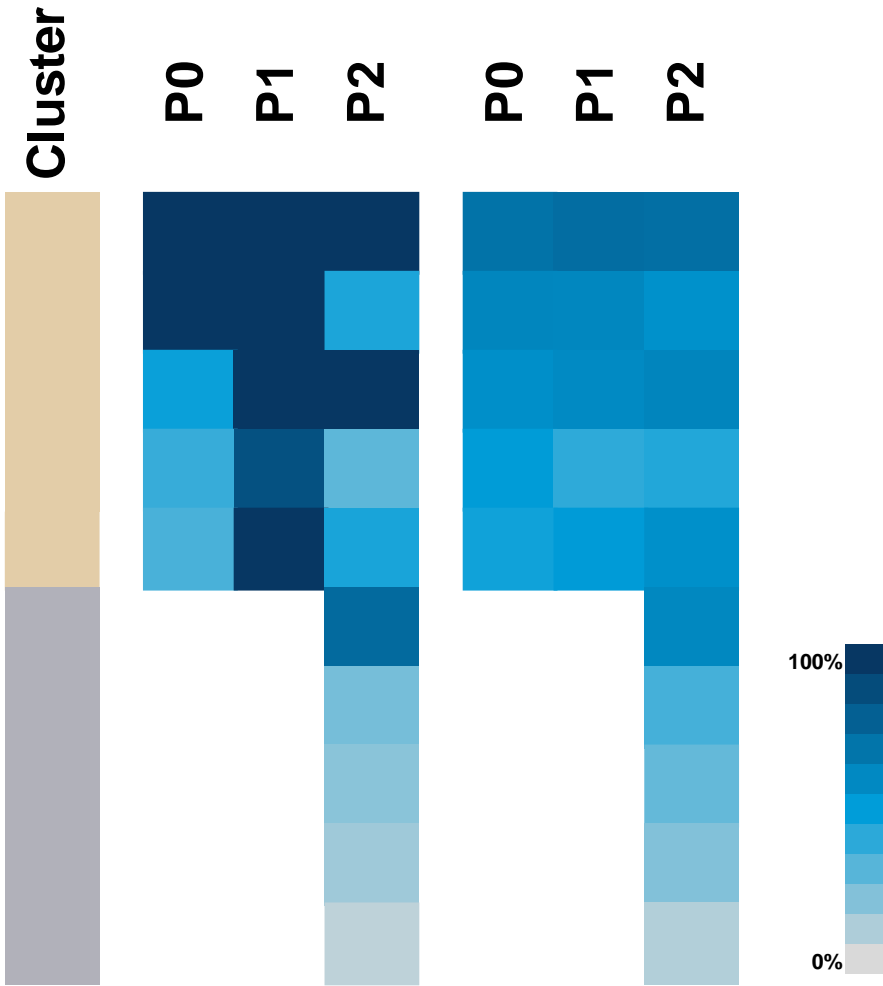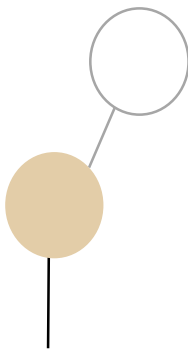

P0

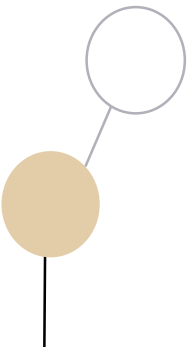

P1

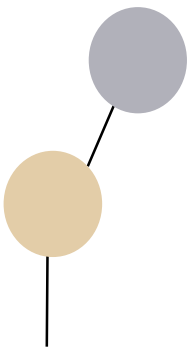

P2

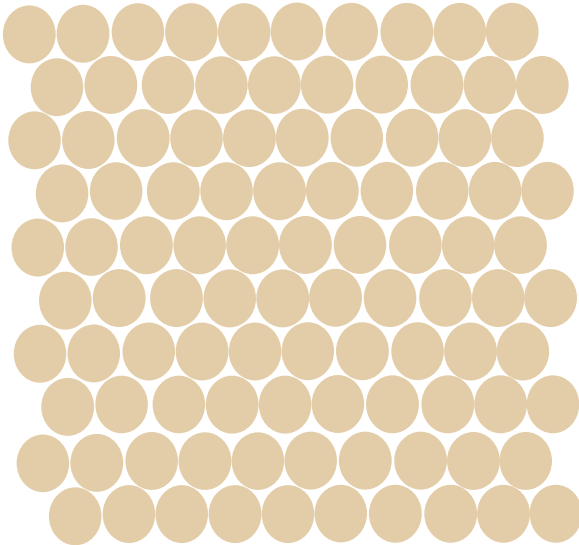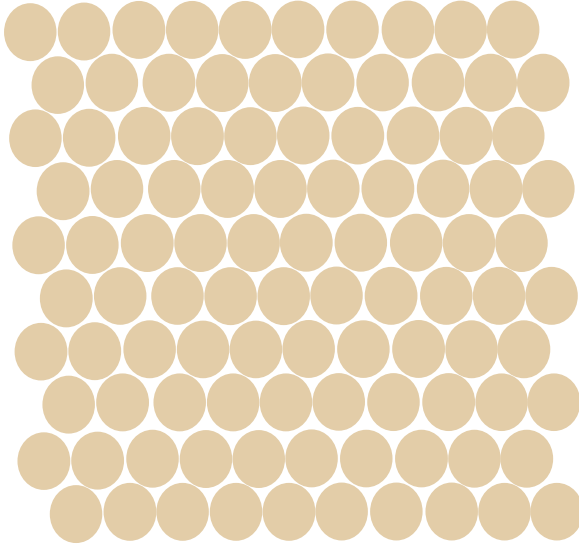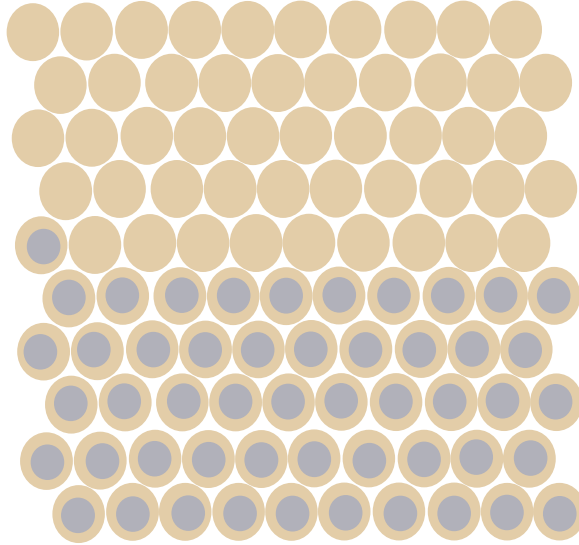

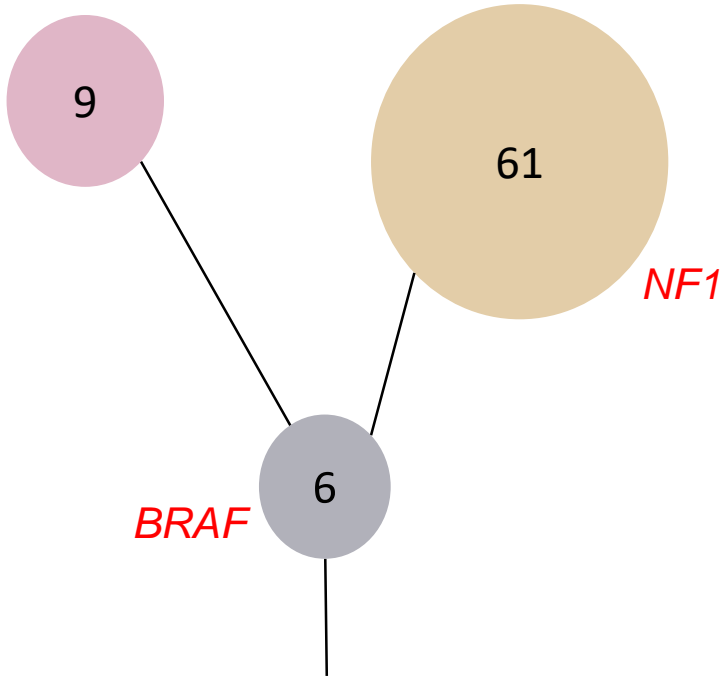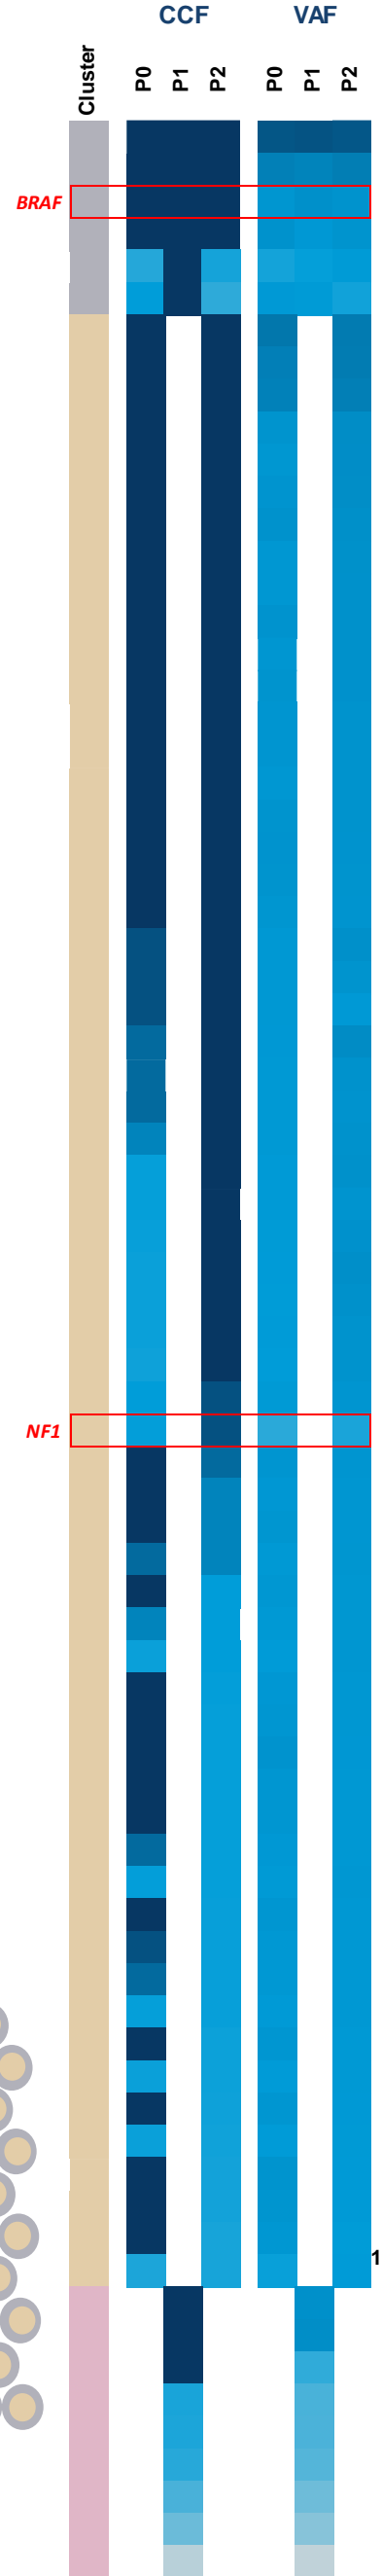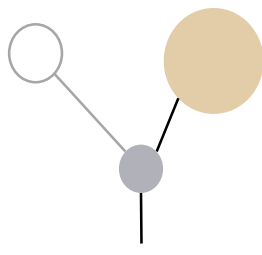

P0

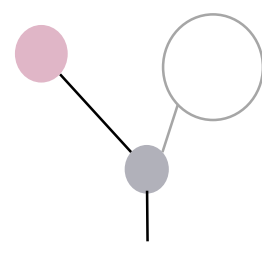

P1

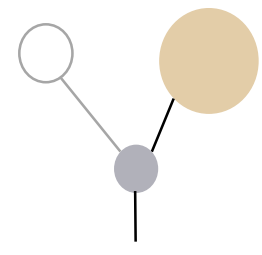

P2

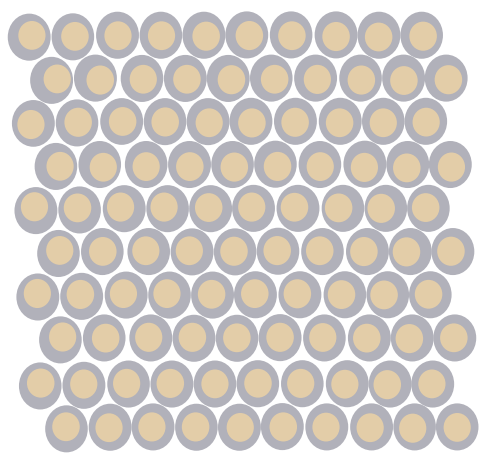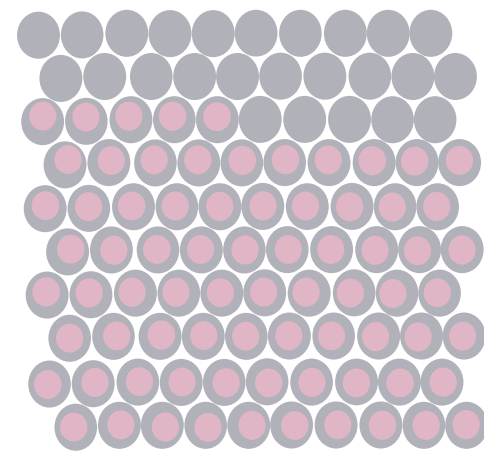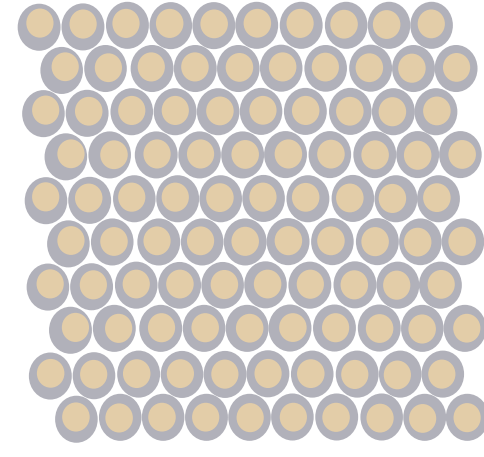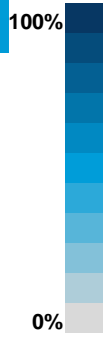



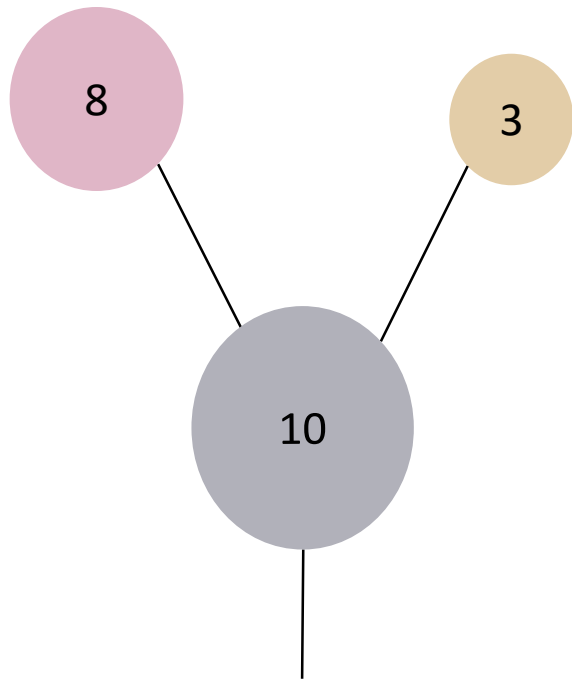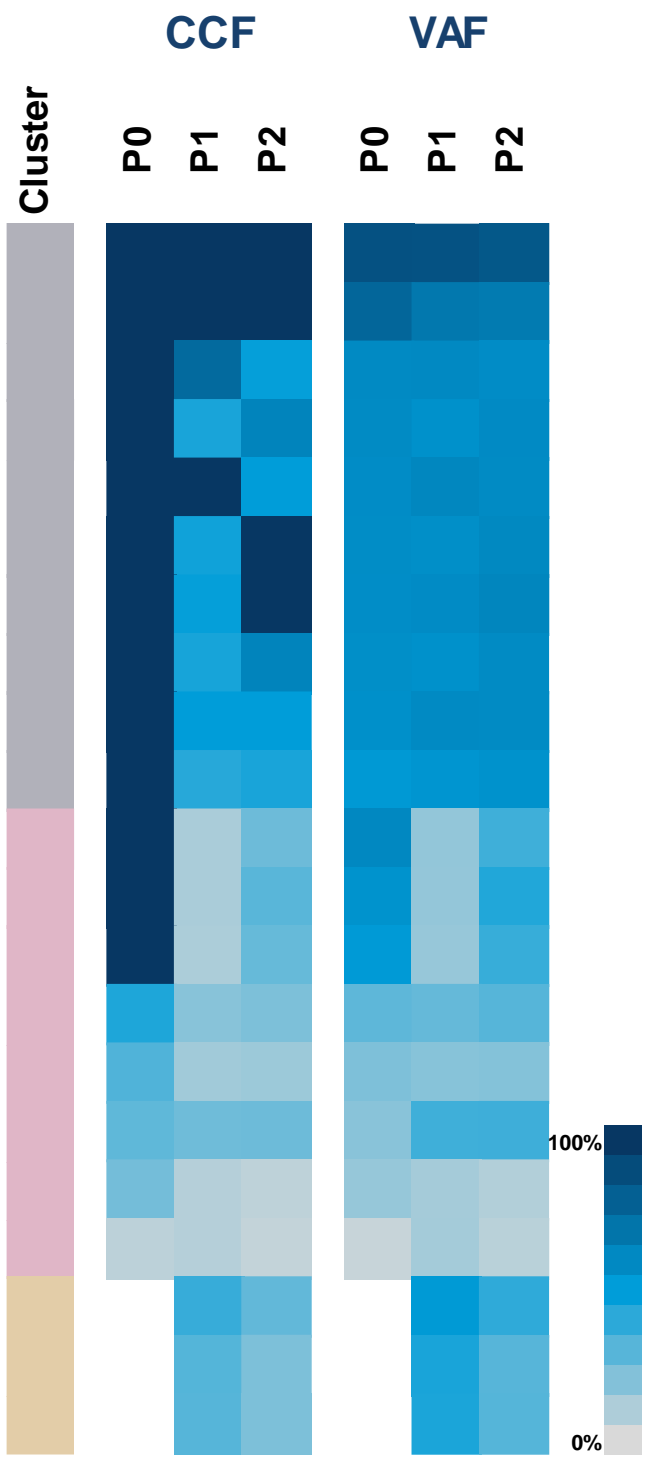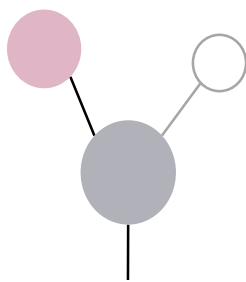

P0

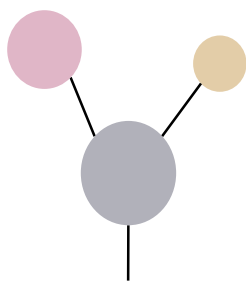

P1

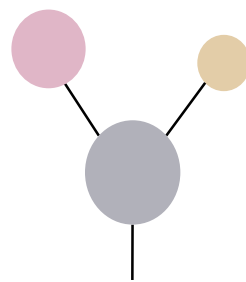

P2

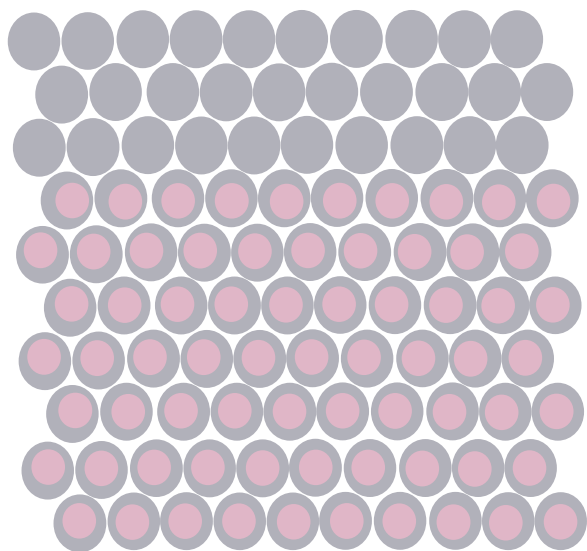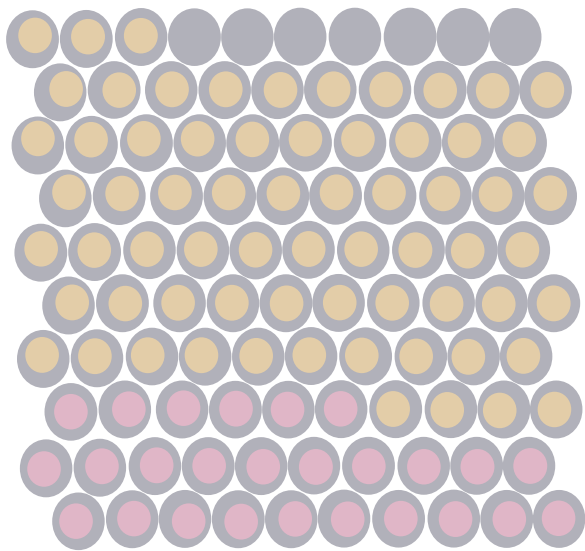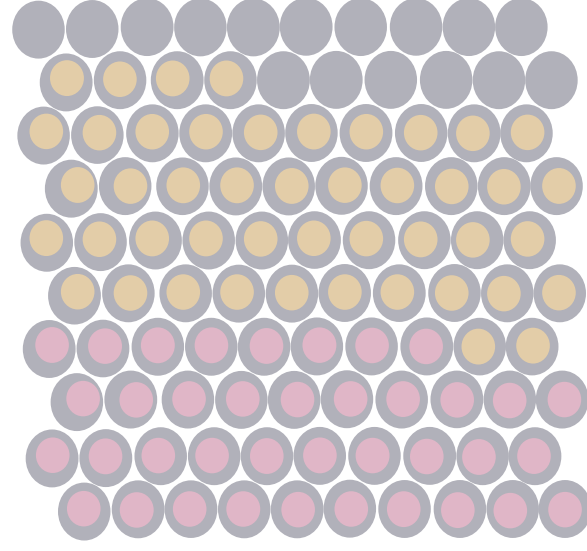



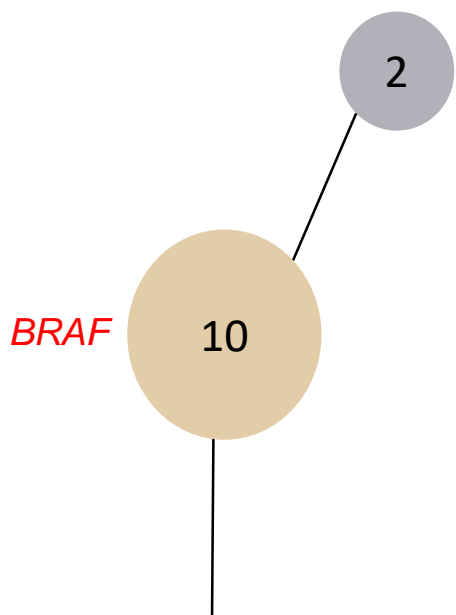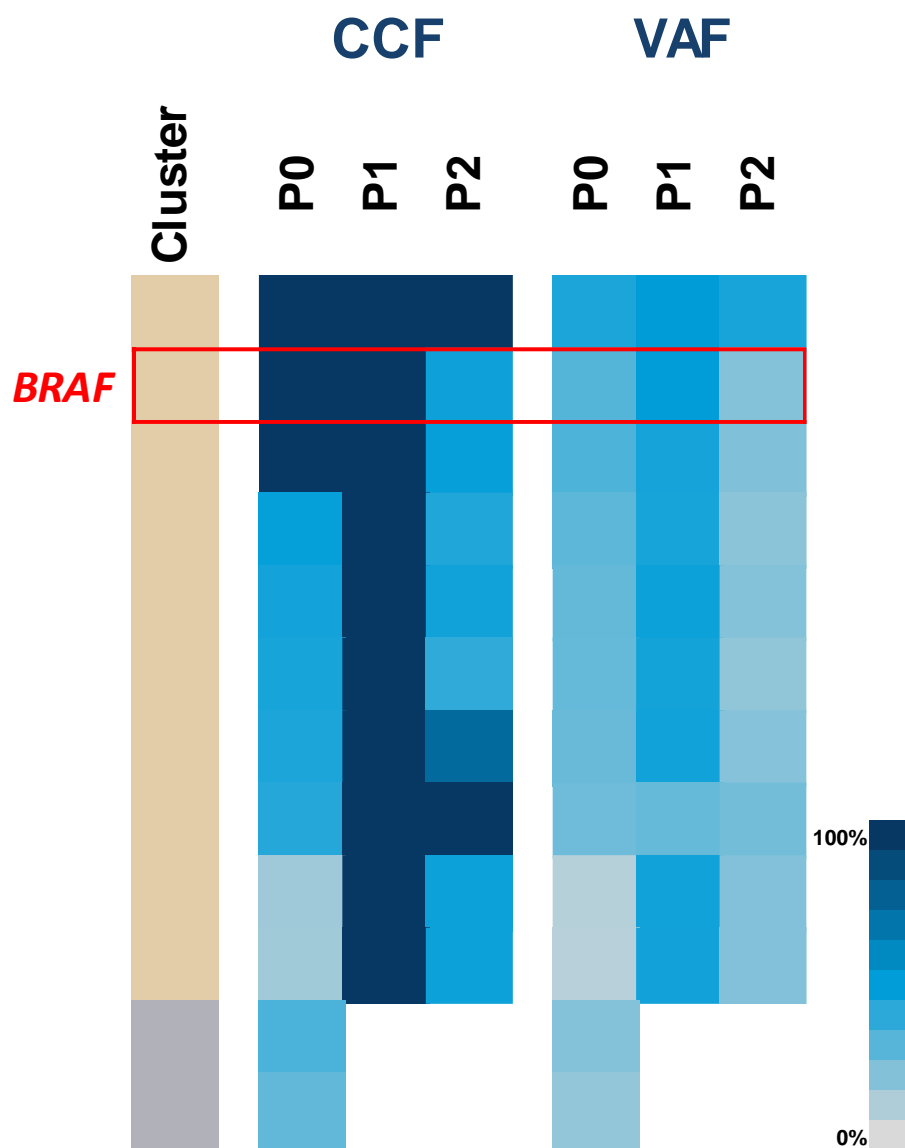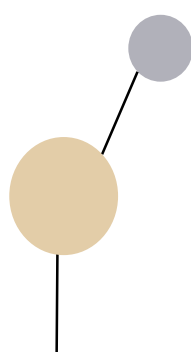

P0

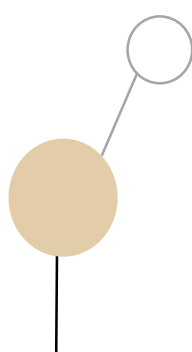

P1

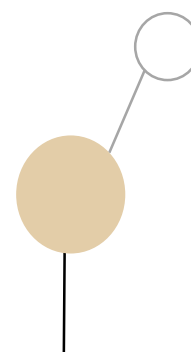

P2

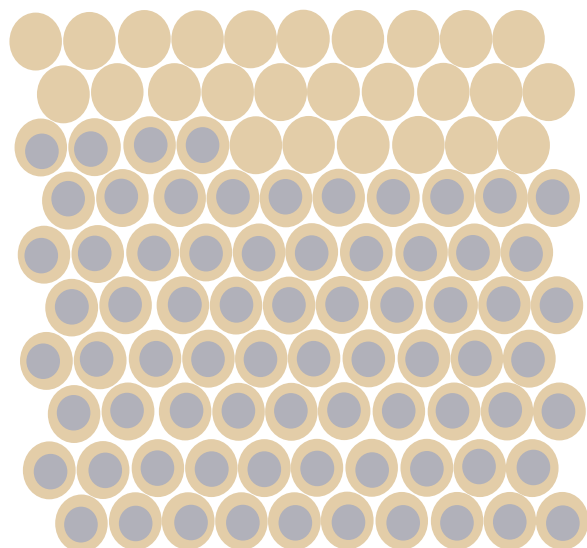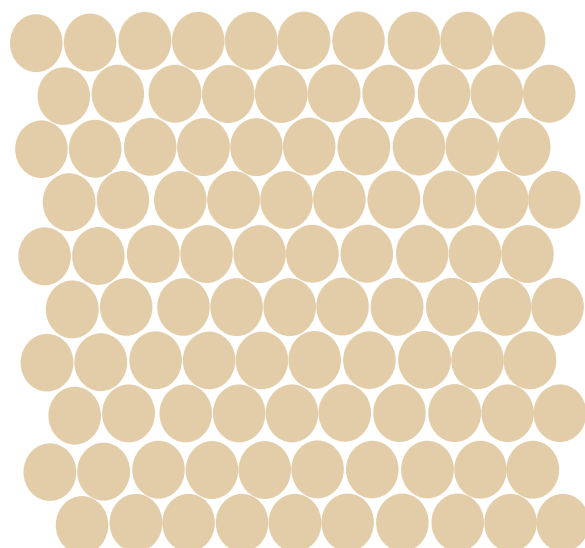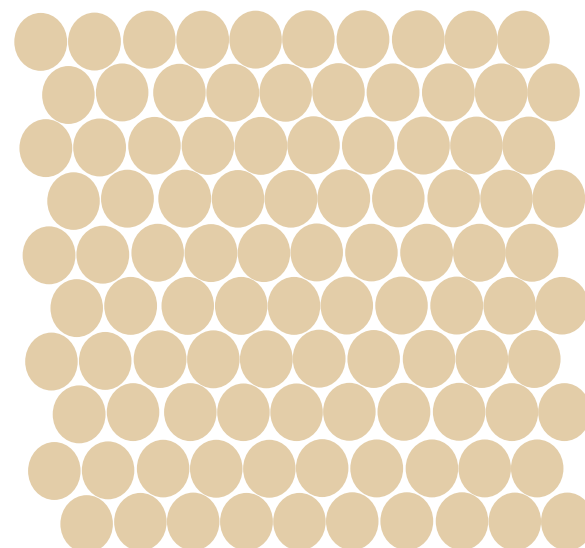



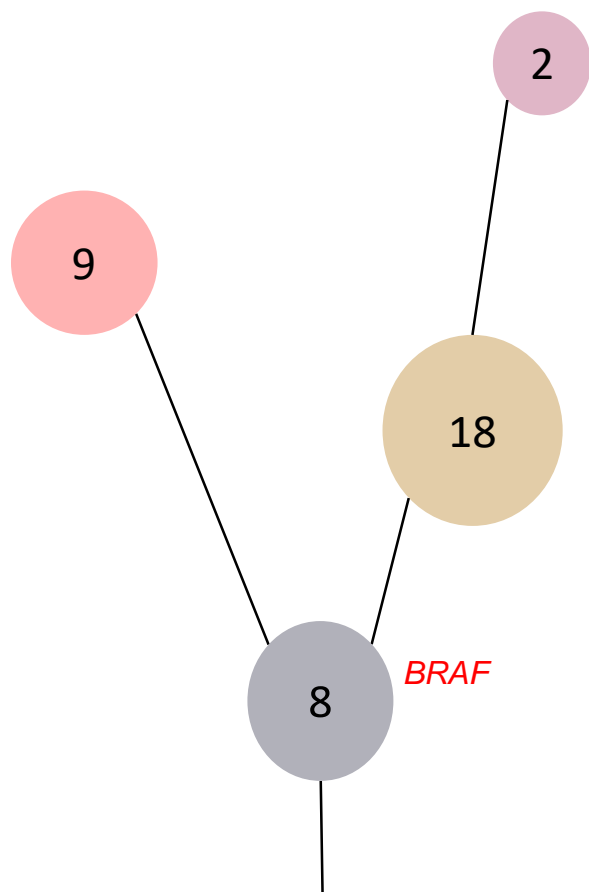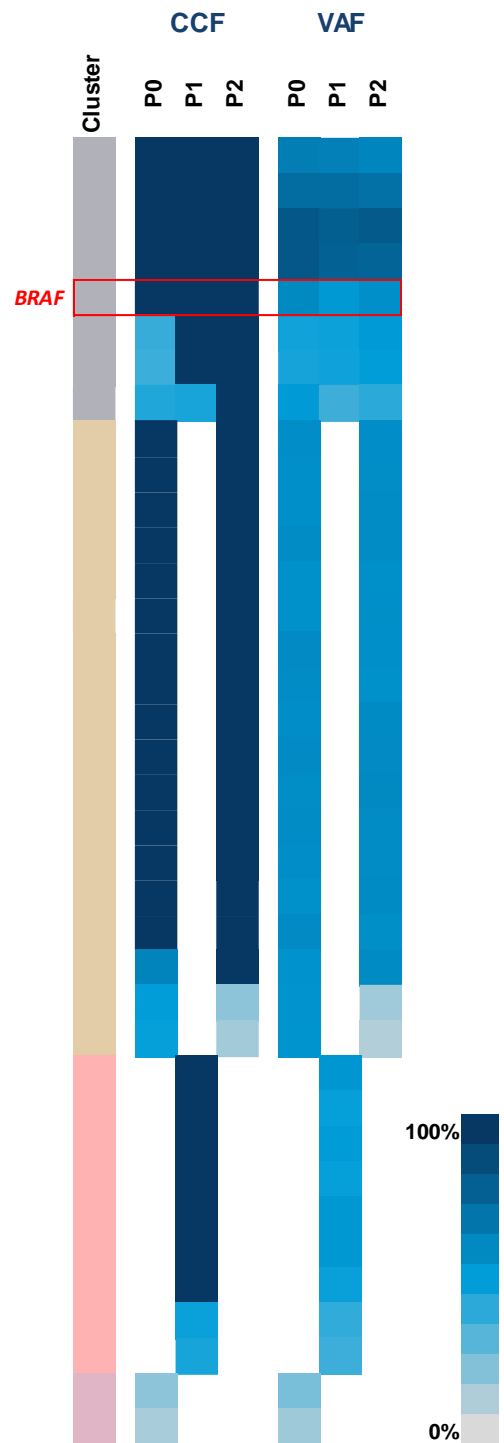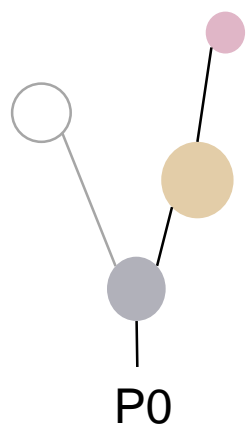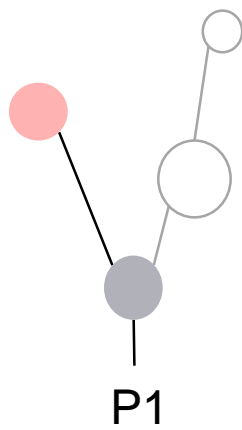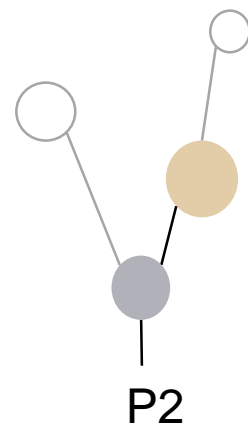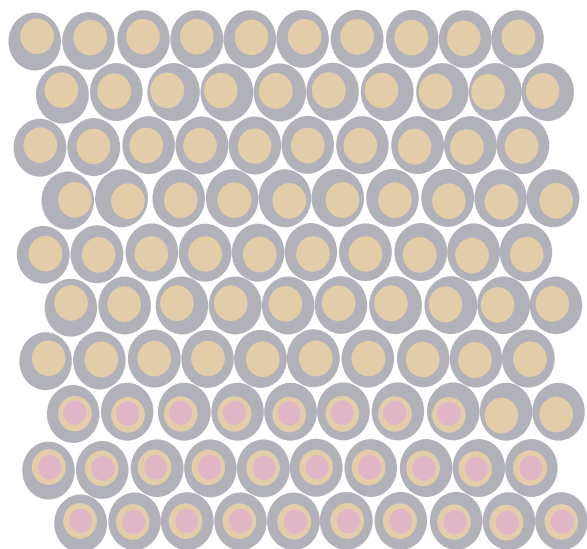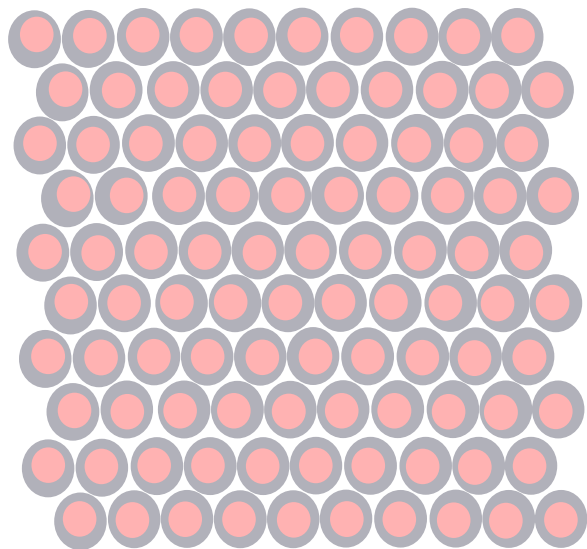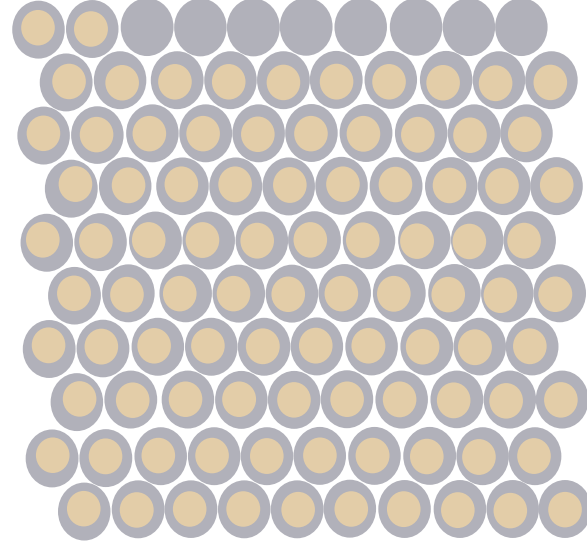

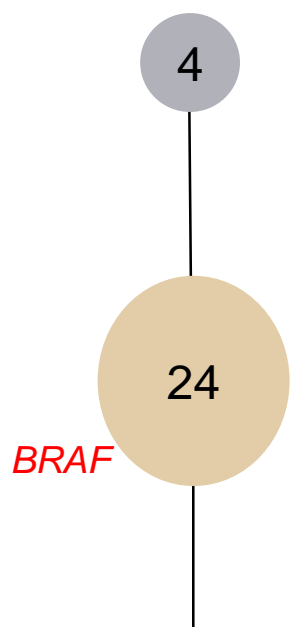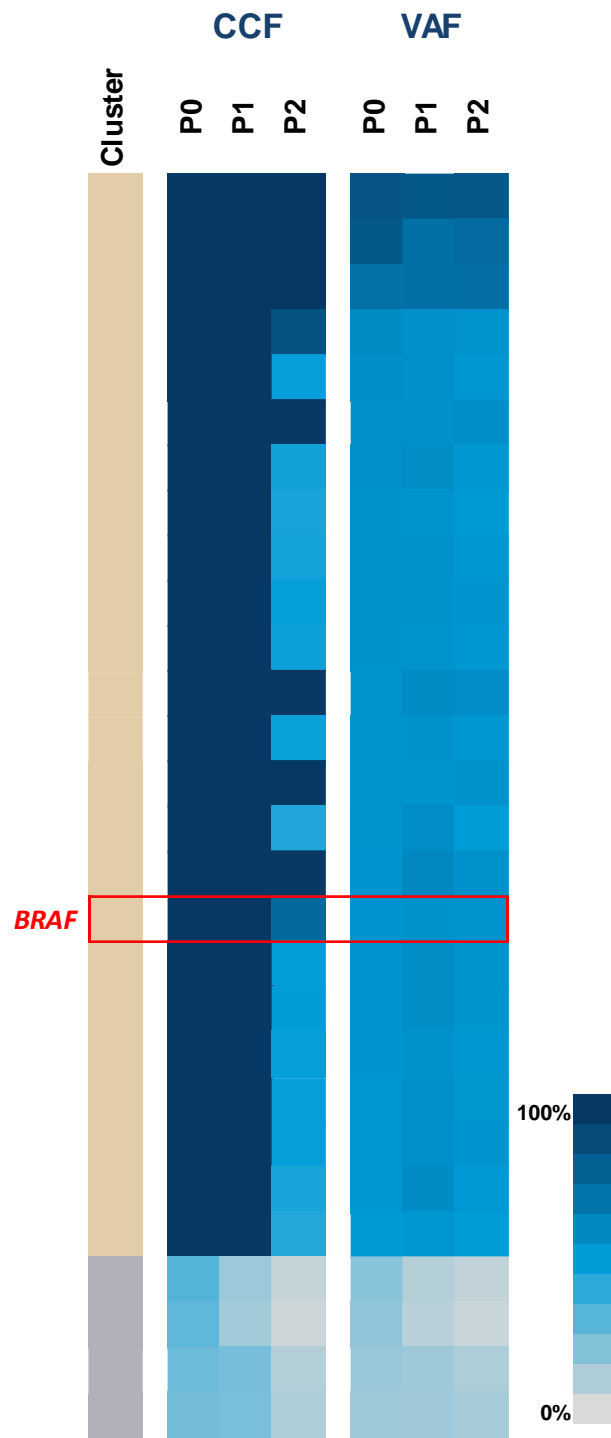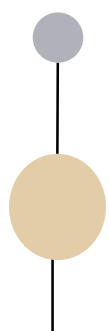

P0

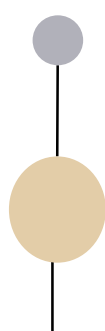

P1

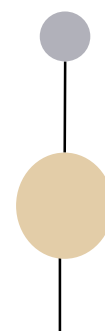

P2

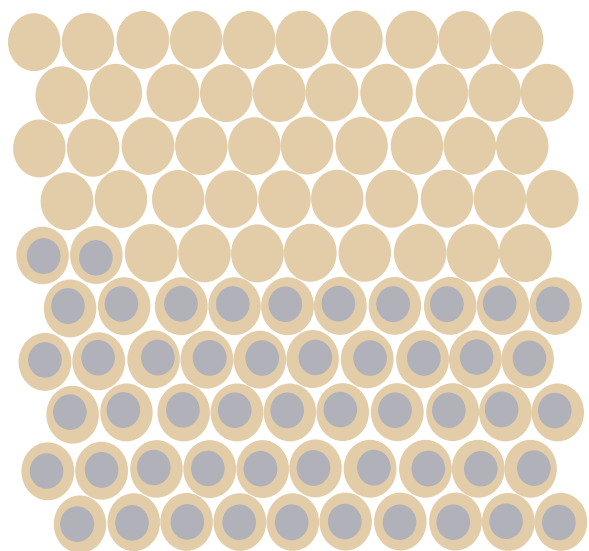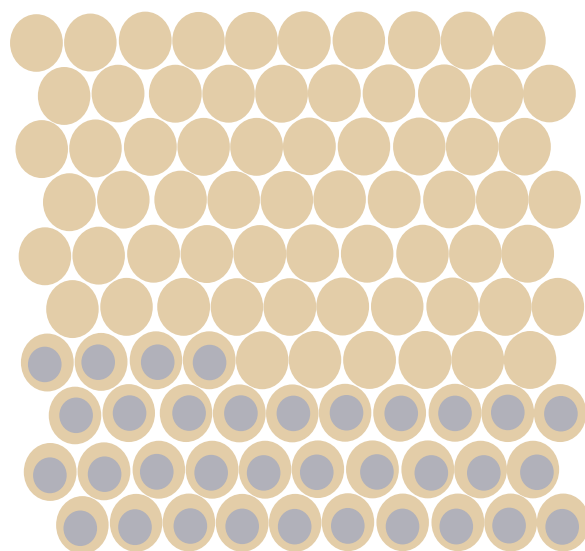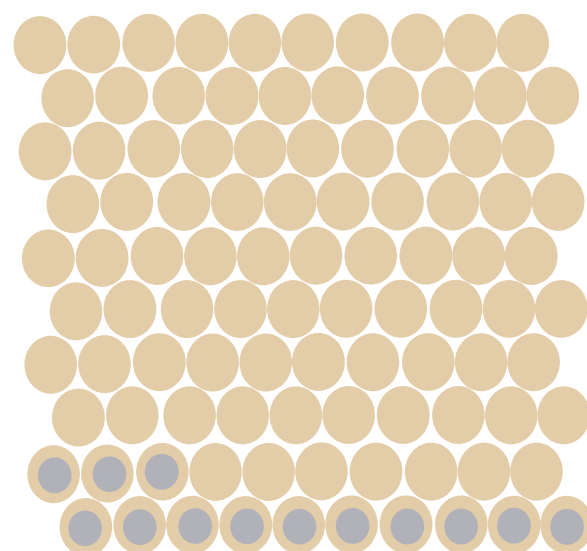

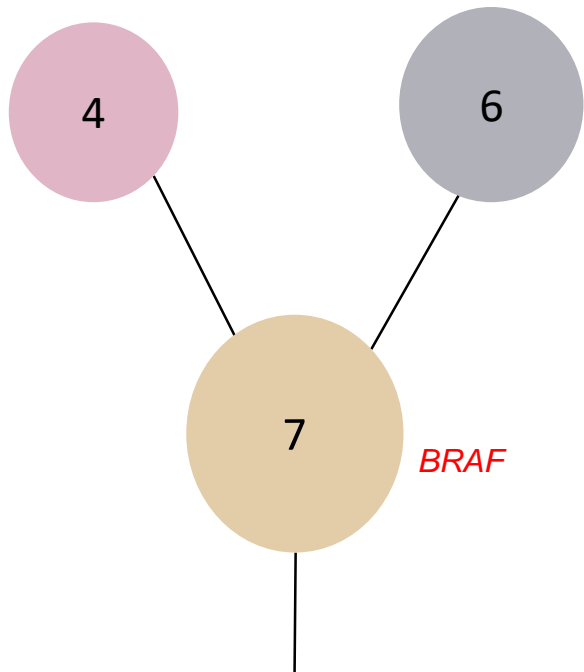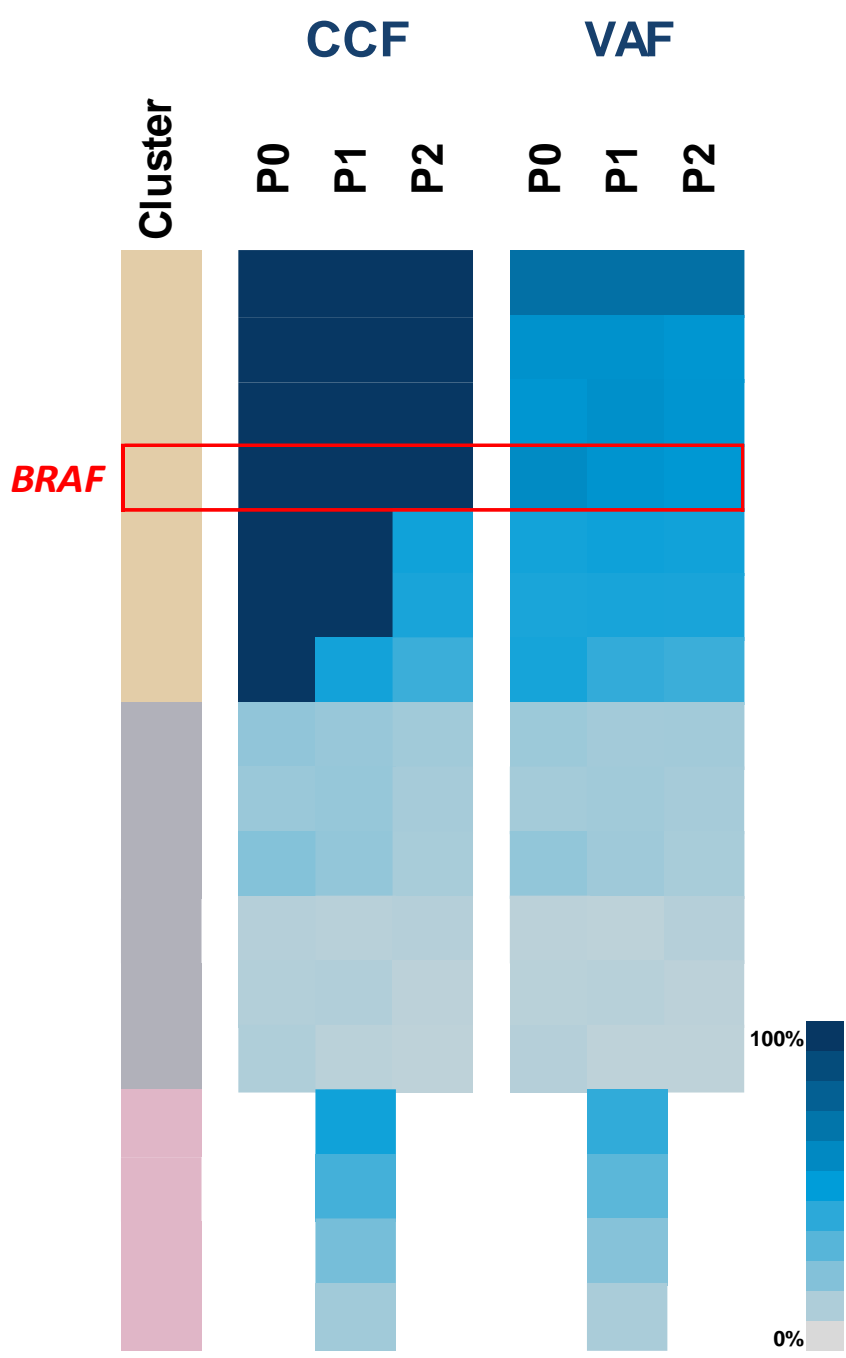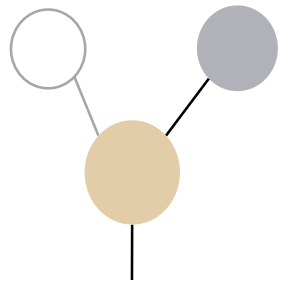

P0

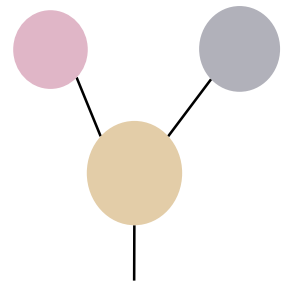

P1

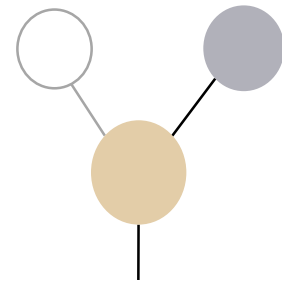

P2

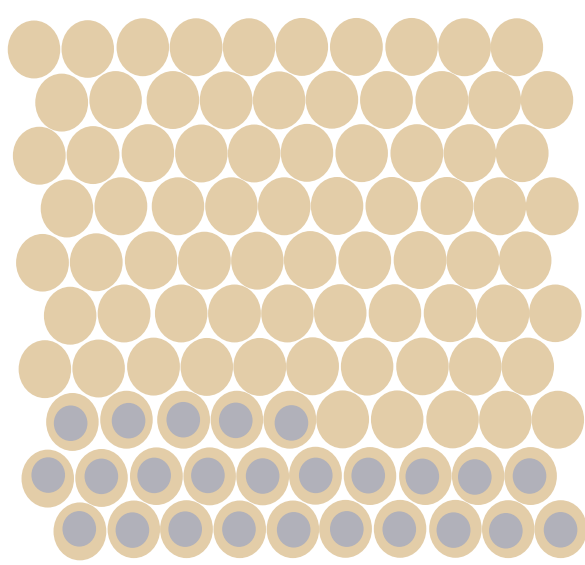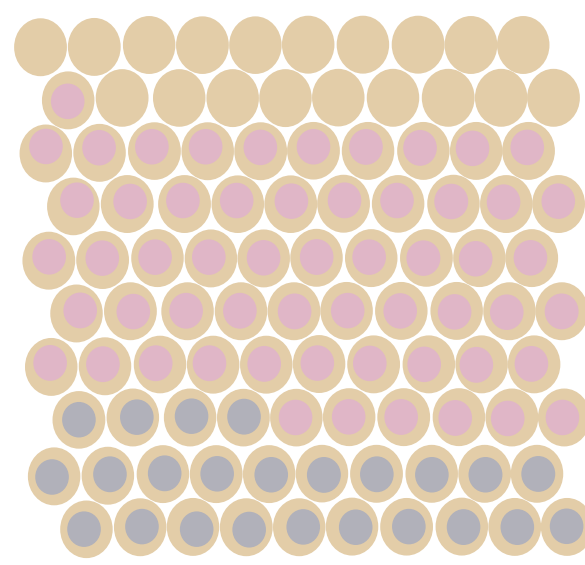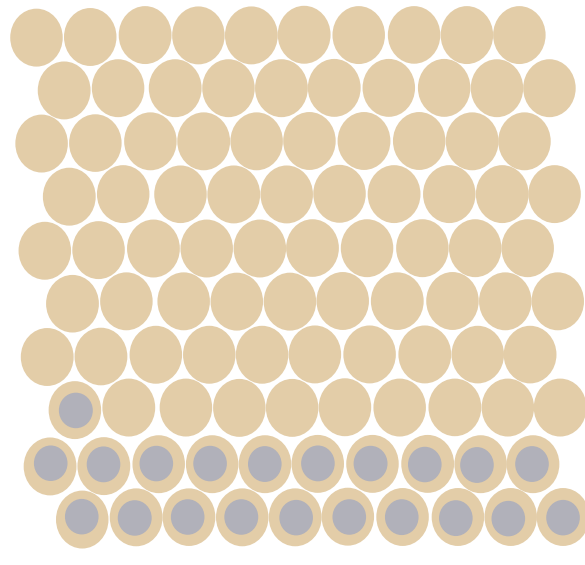

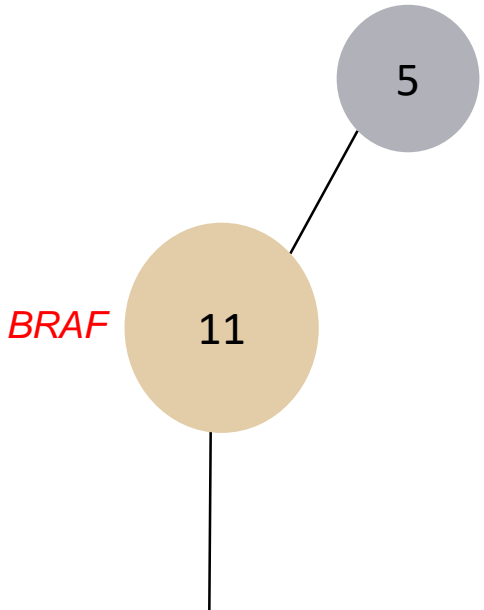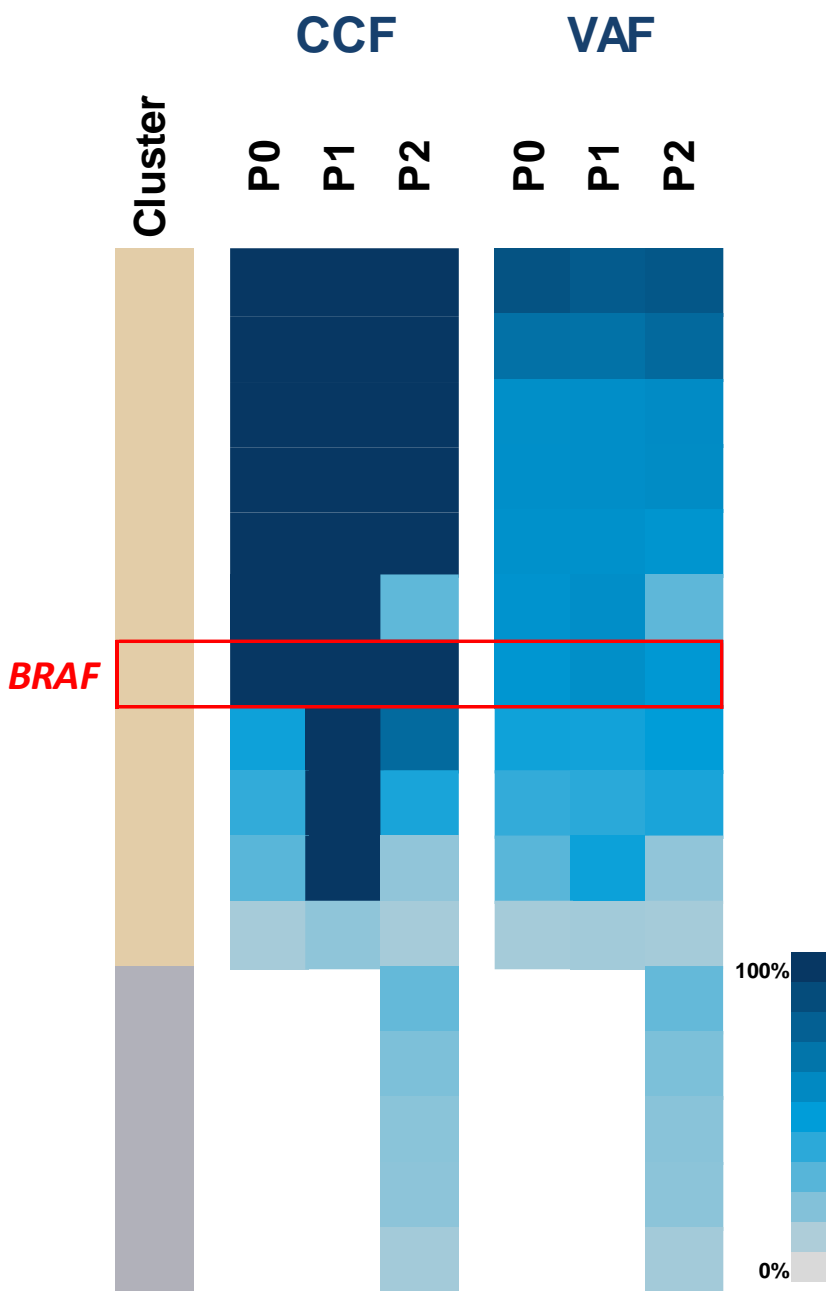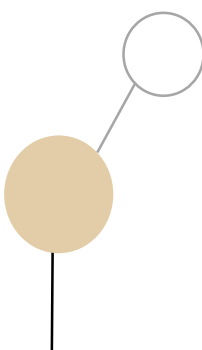

P0

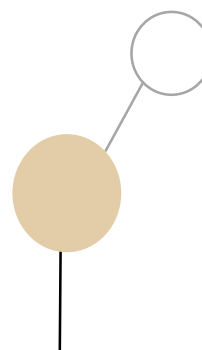

P1

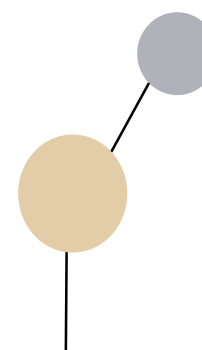

P2

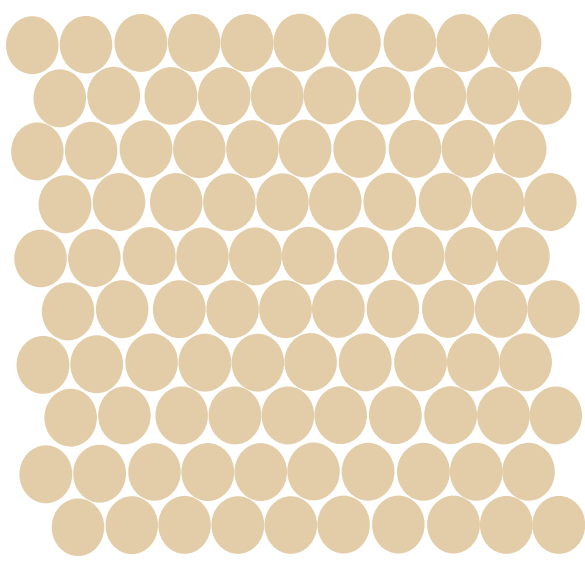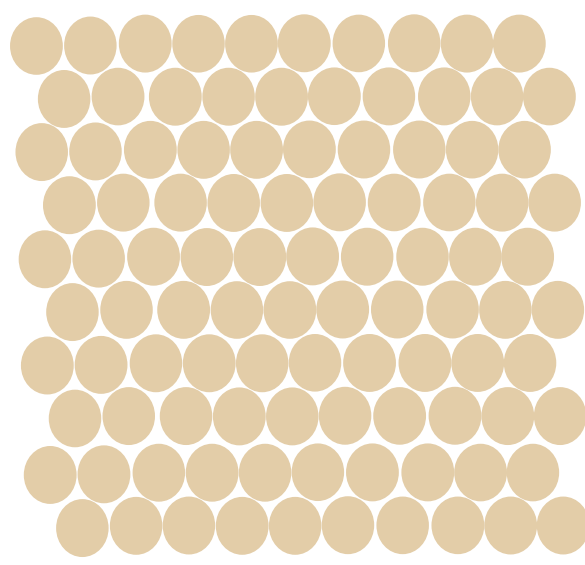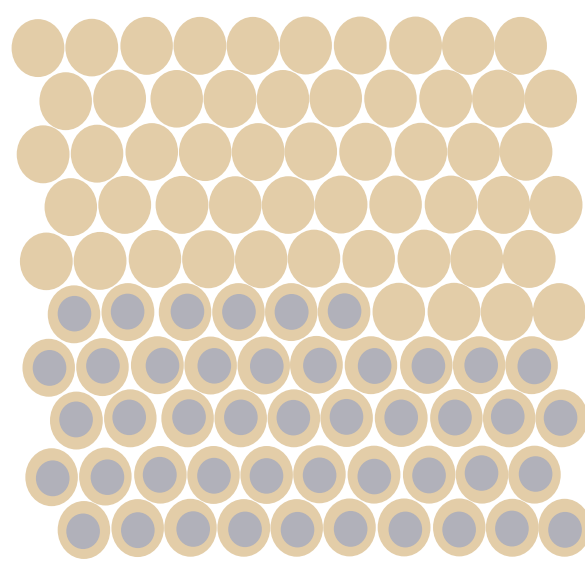

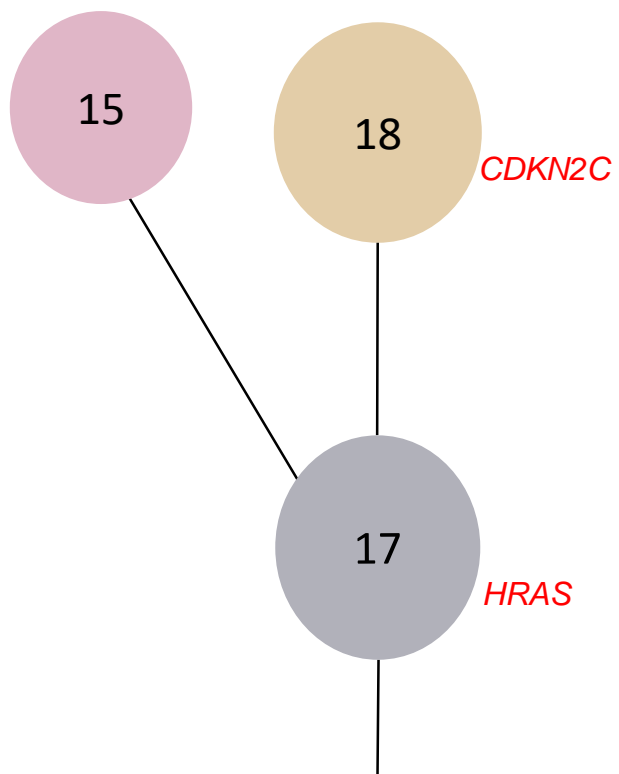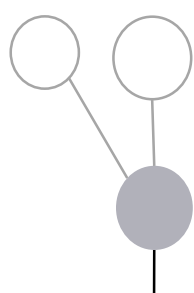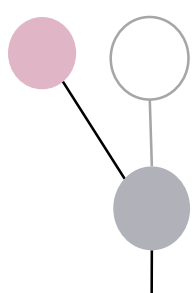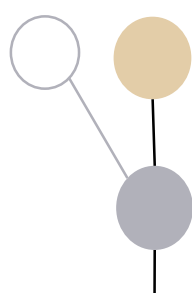

P0

P1

P2

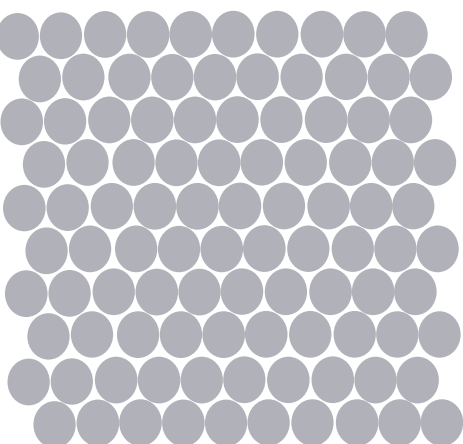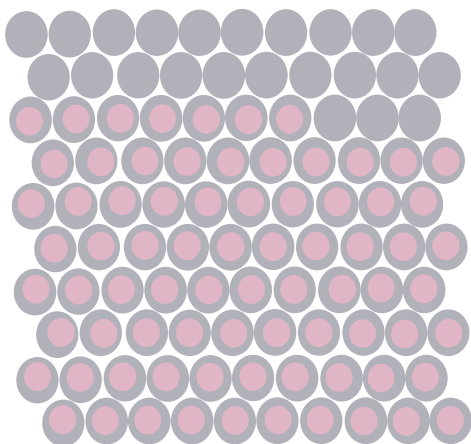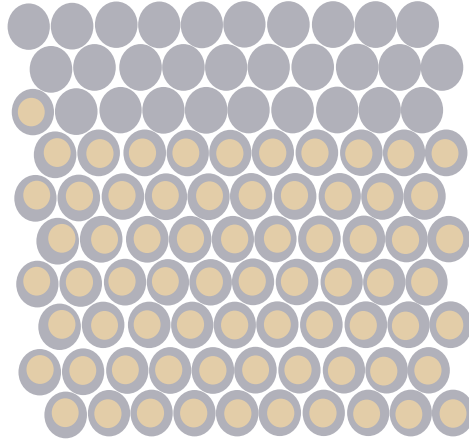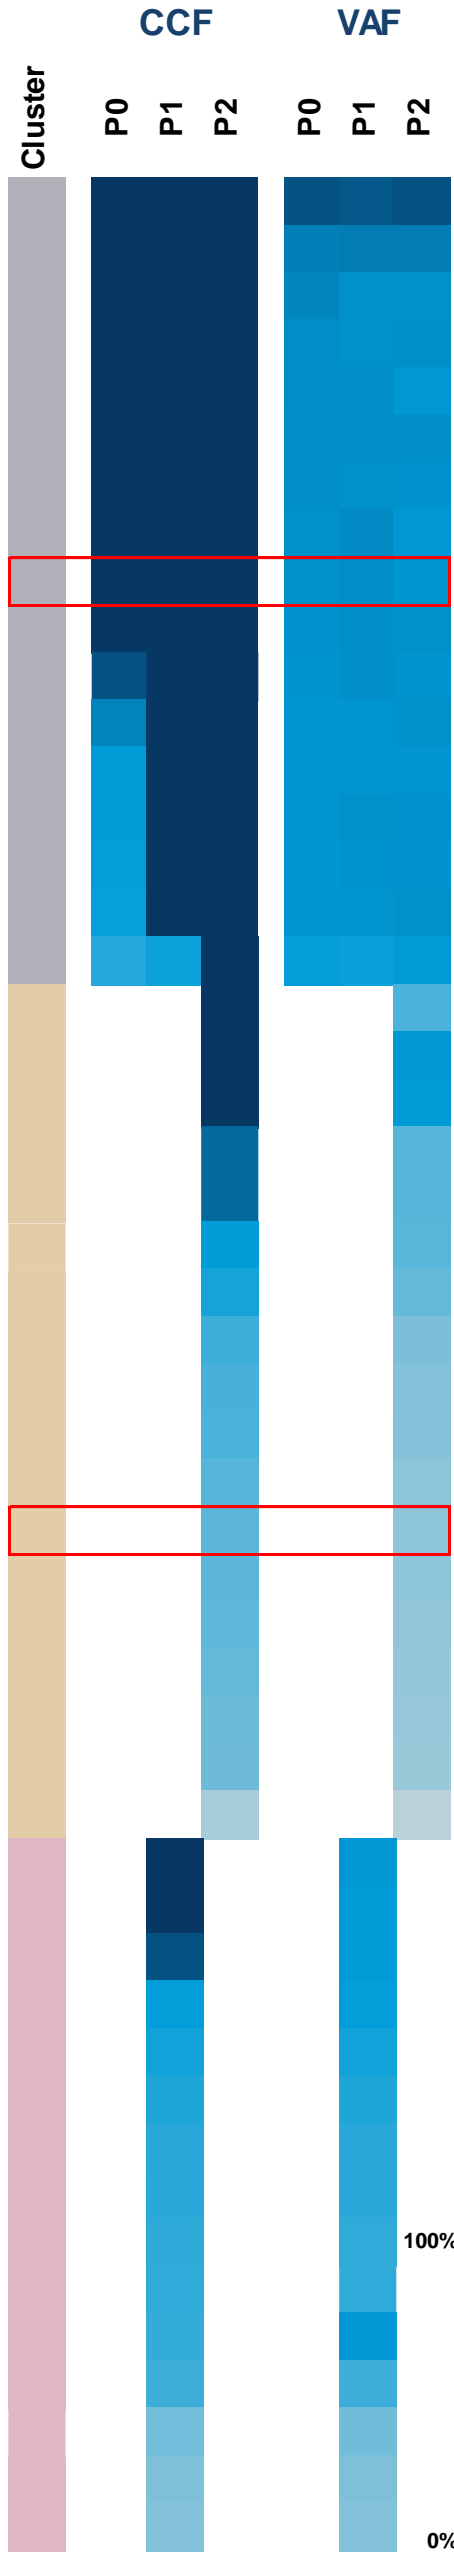

100%  
0%

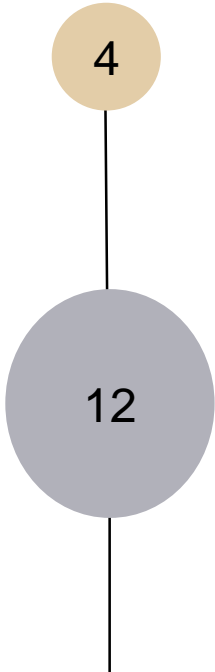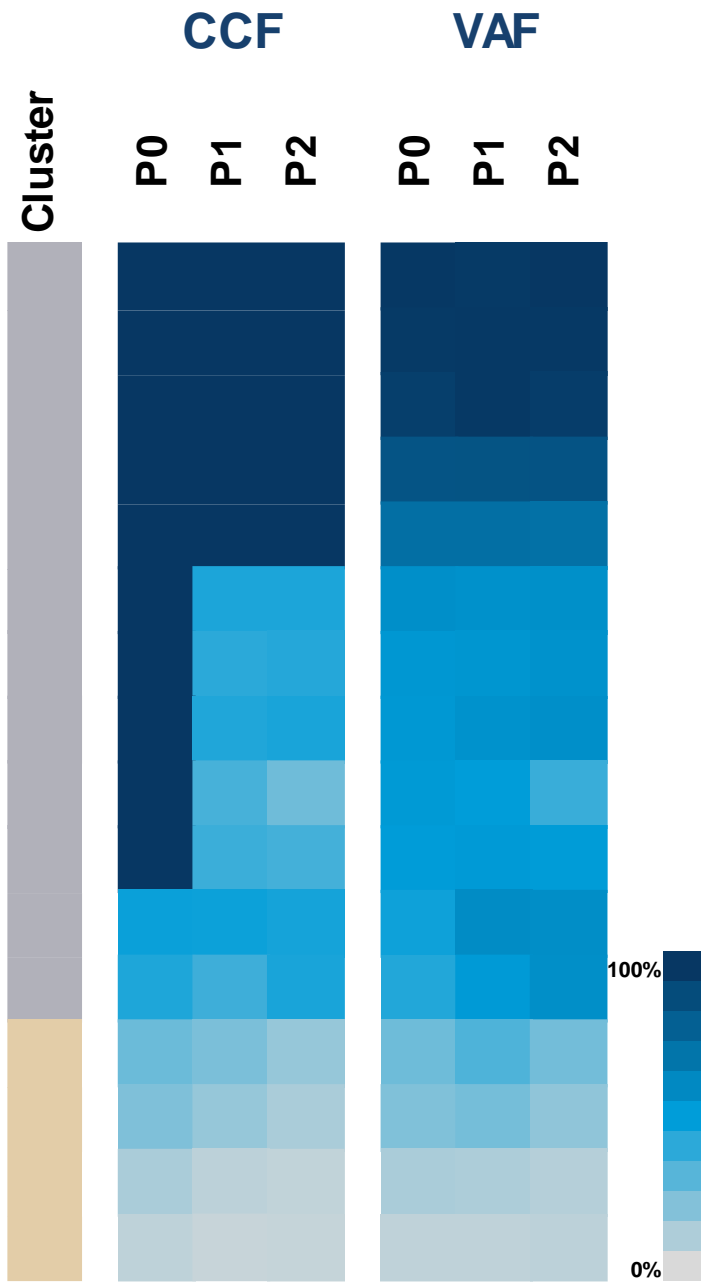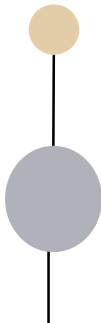

P0

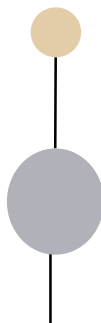

P1

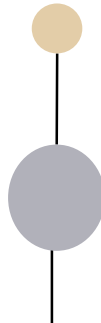

P2

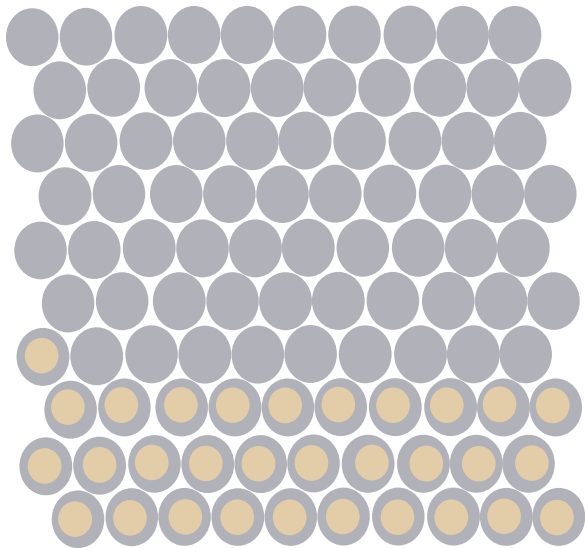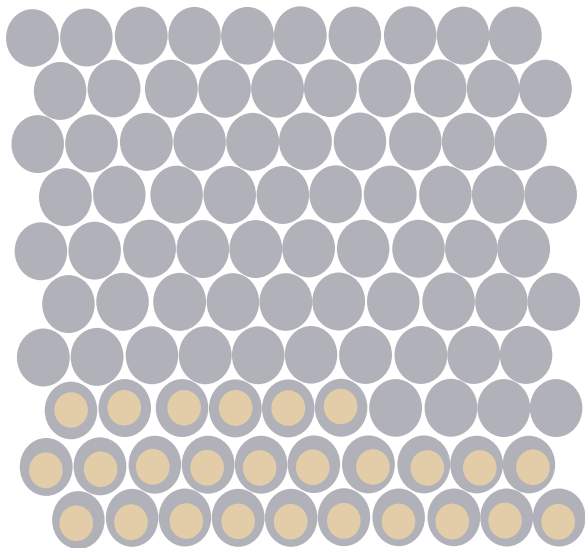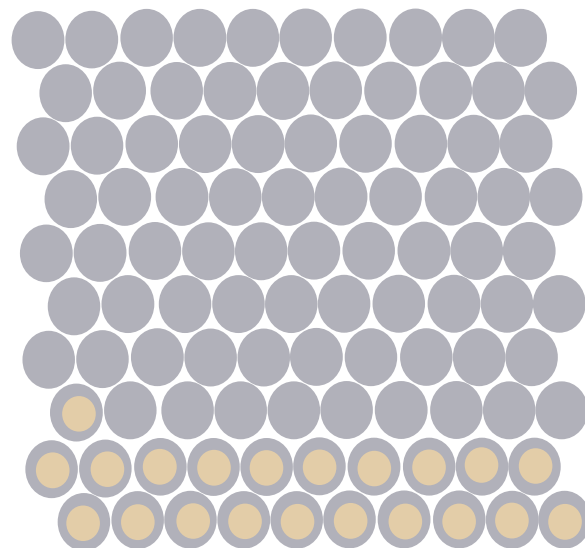





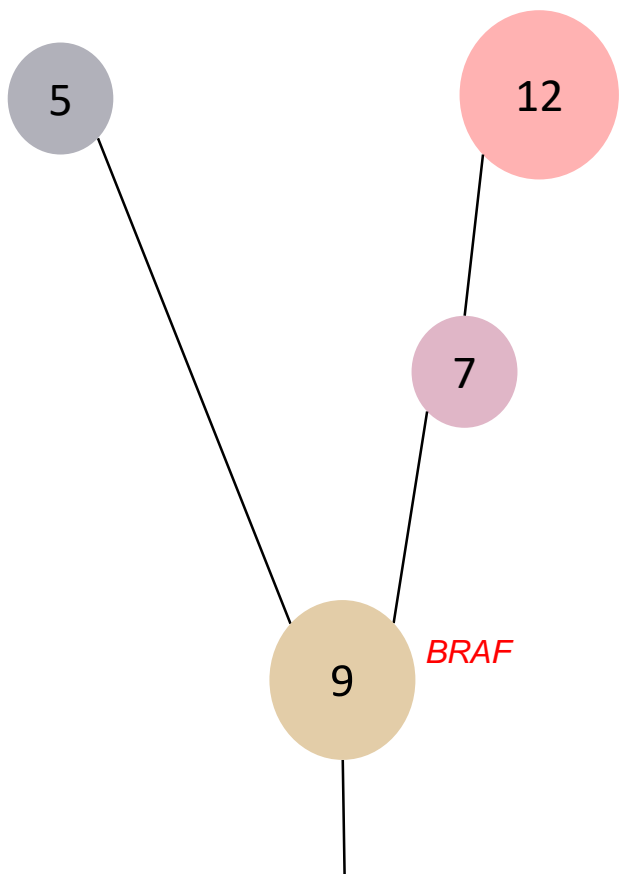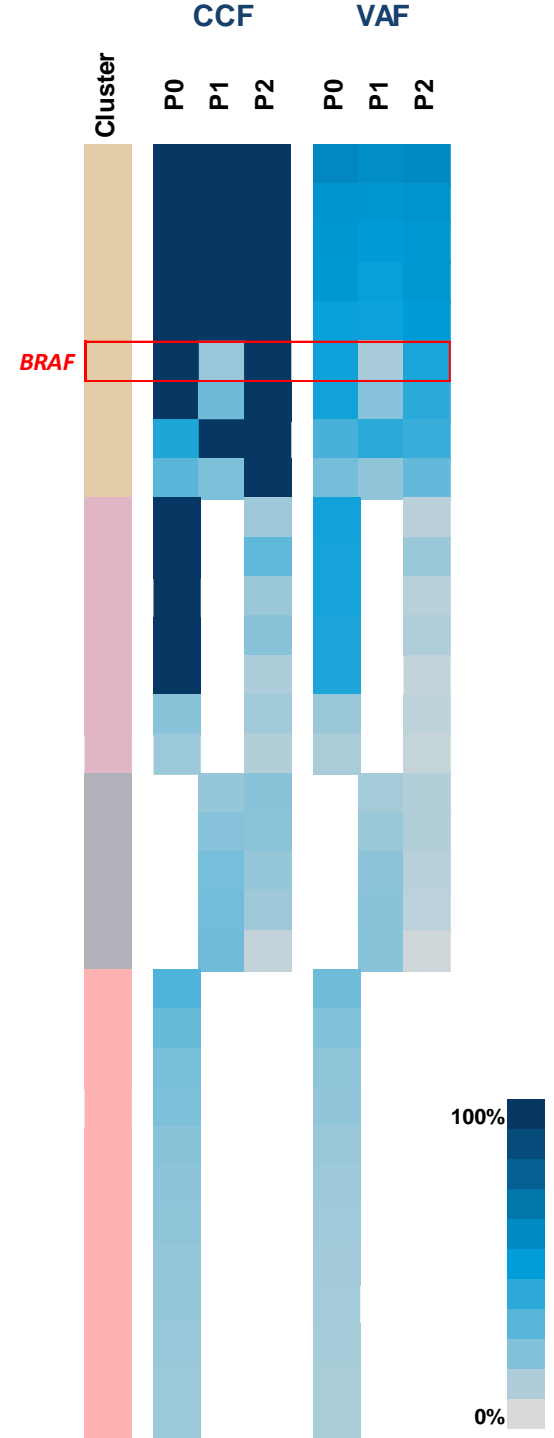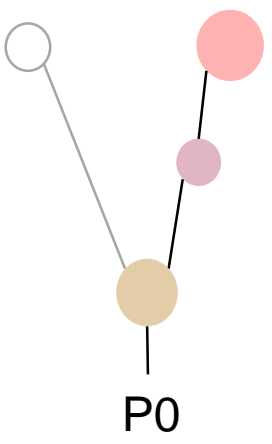

P0

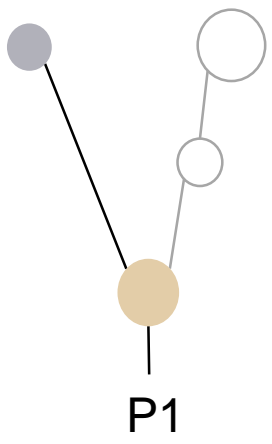

P1

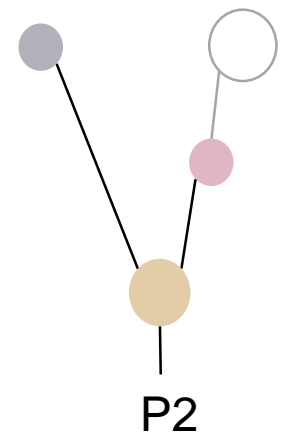

P2

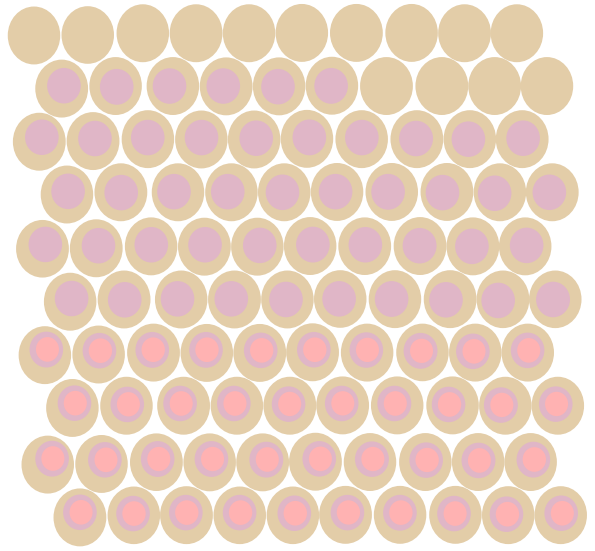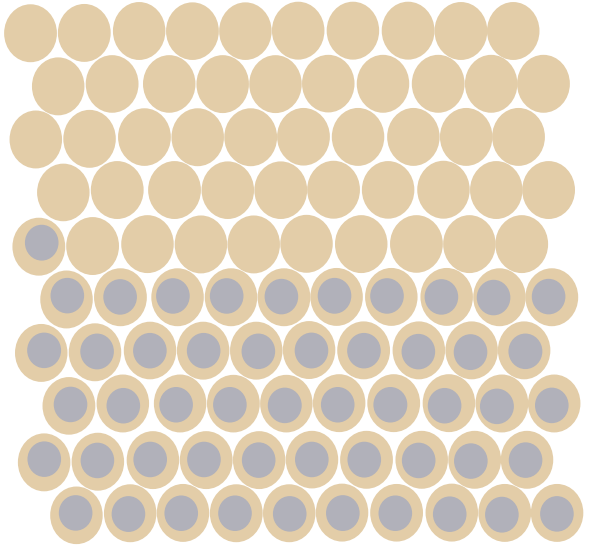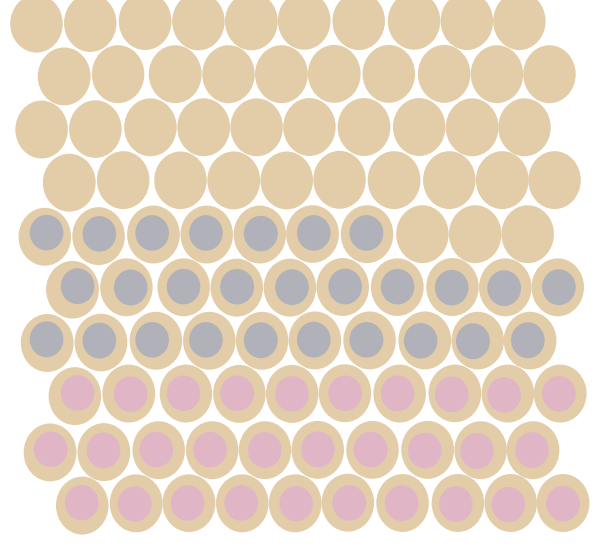

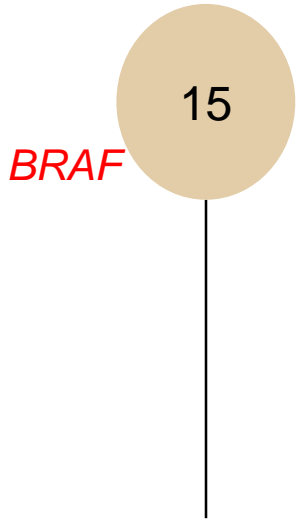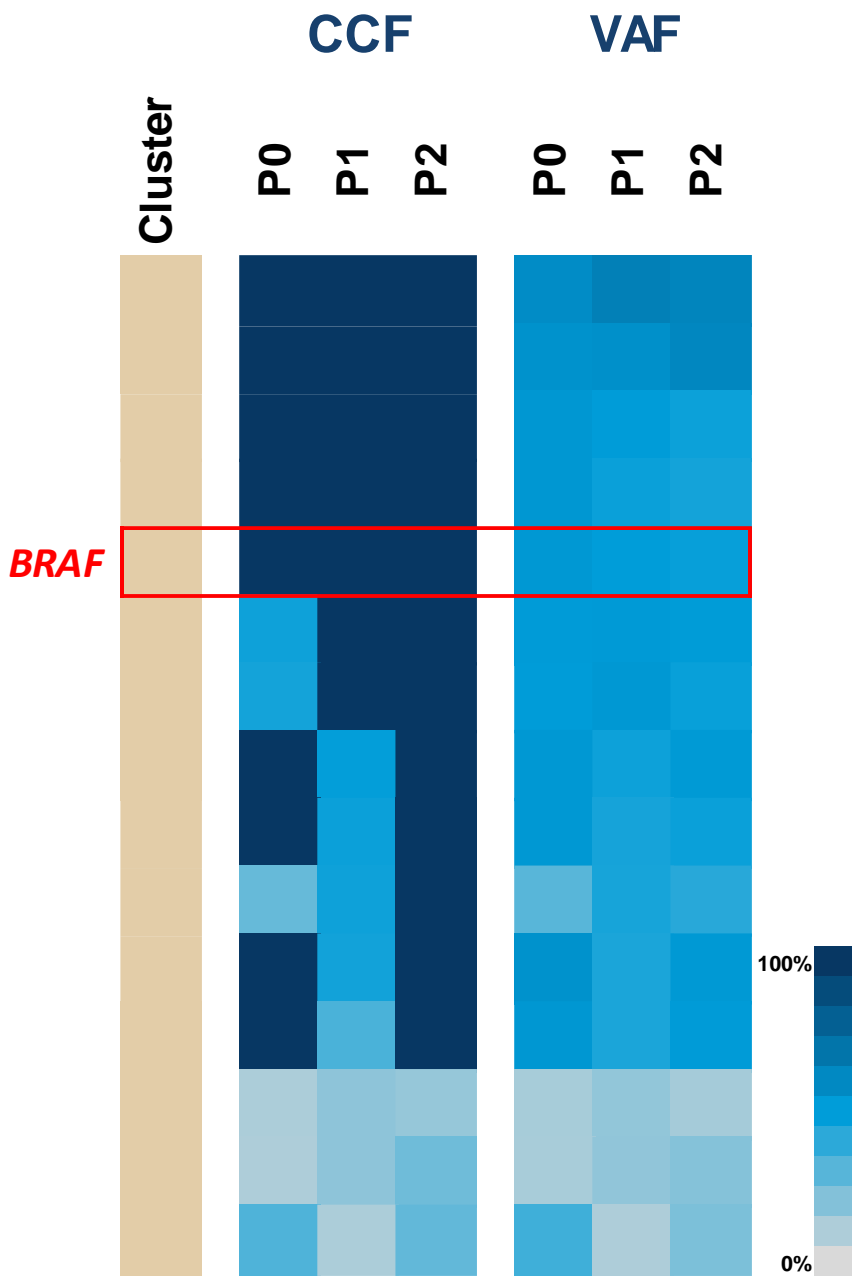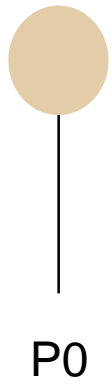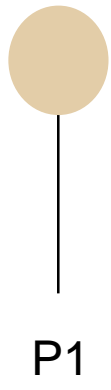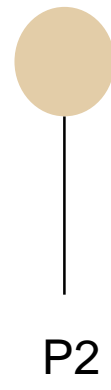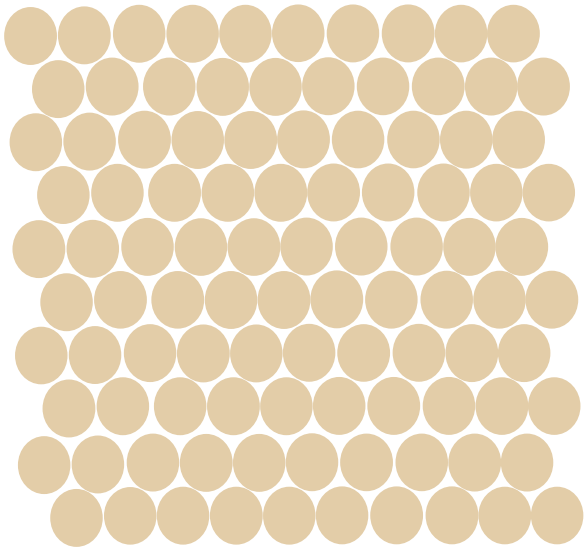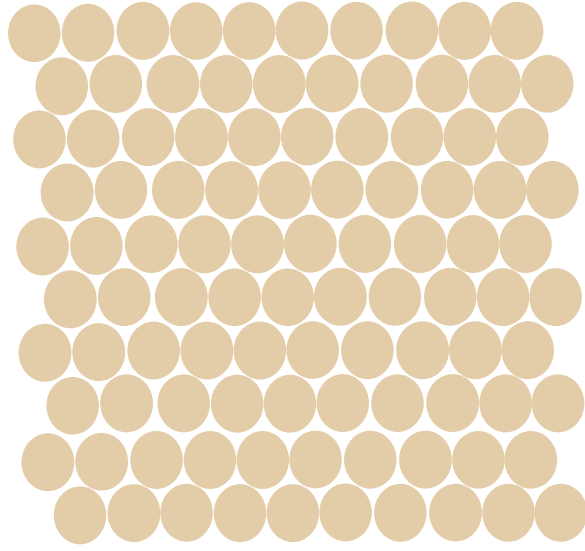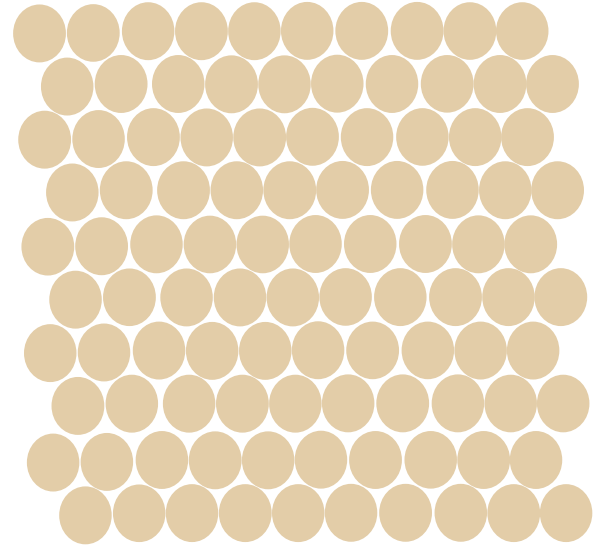



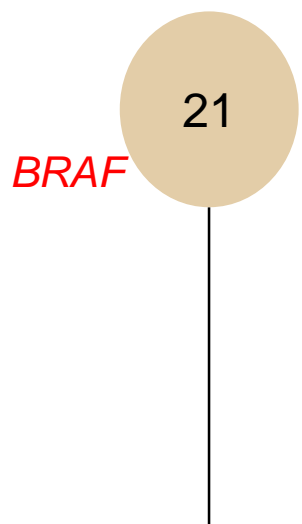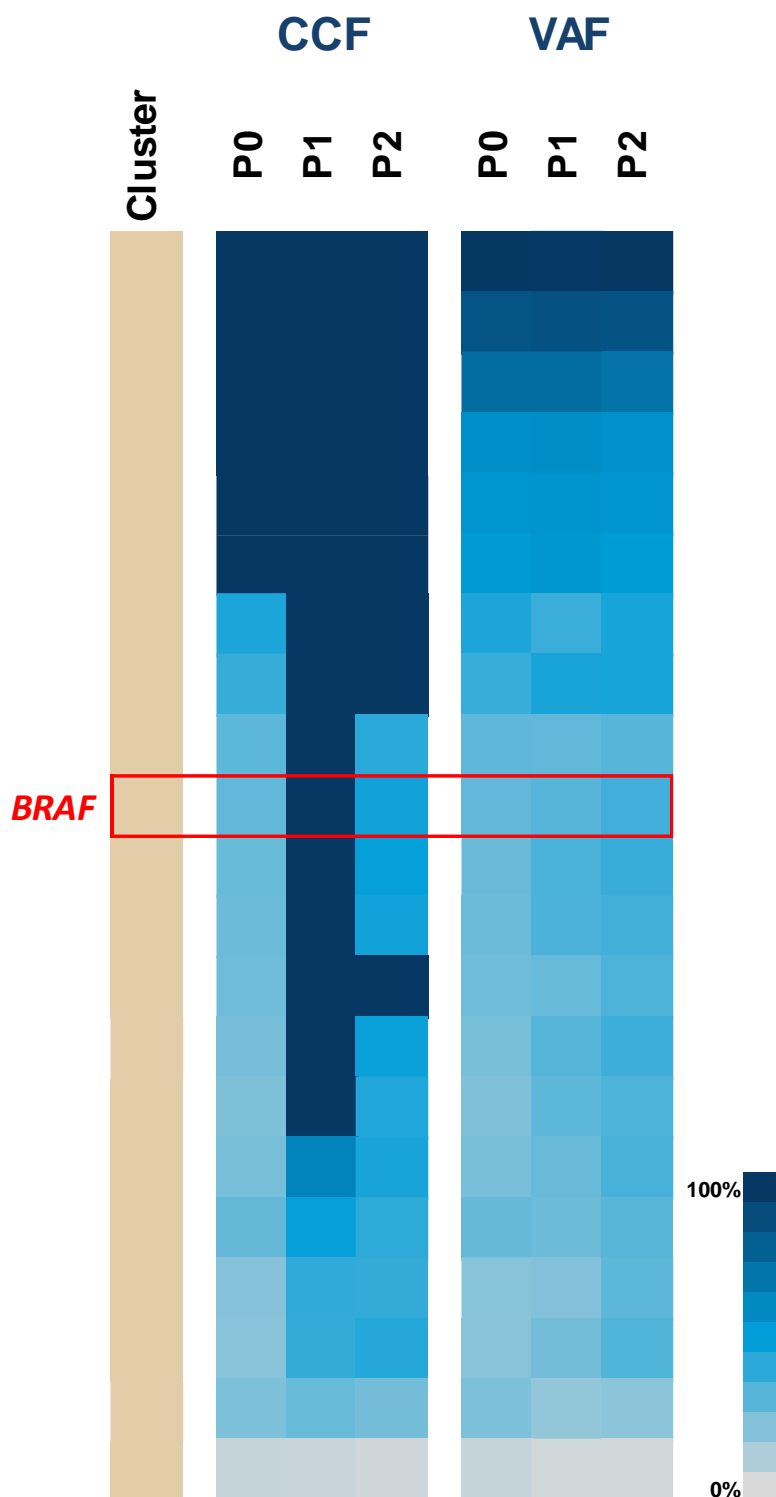

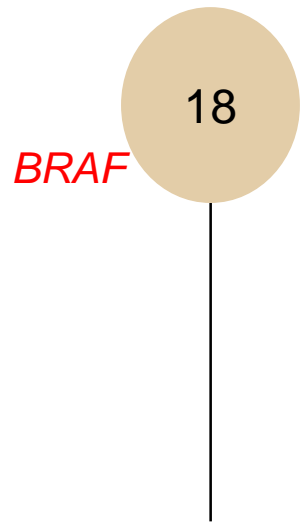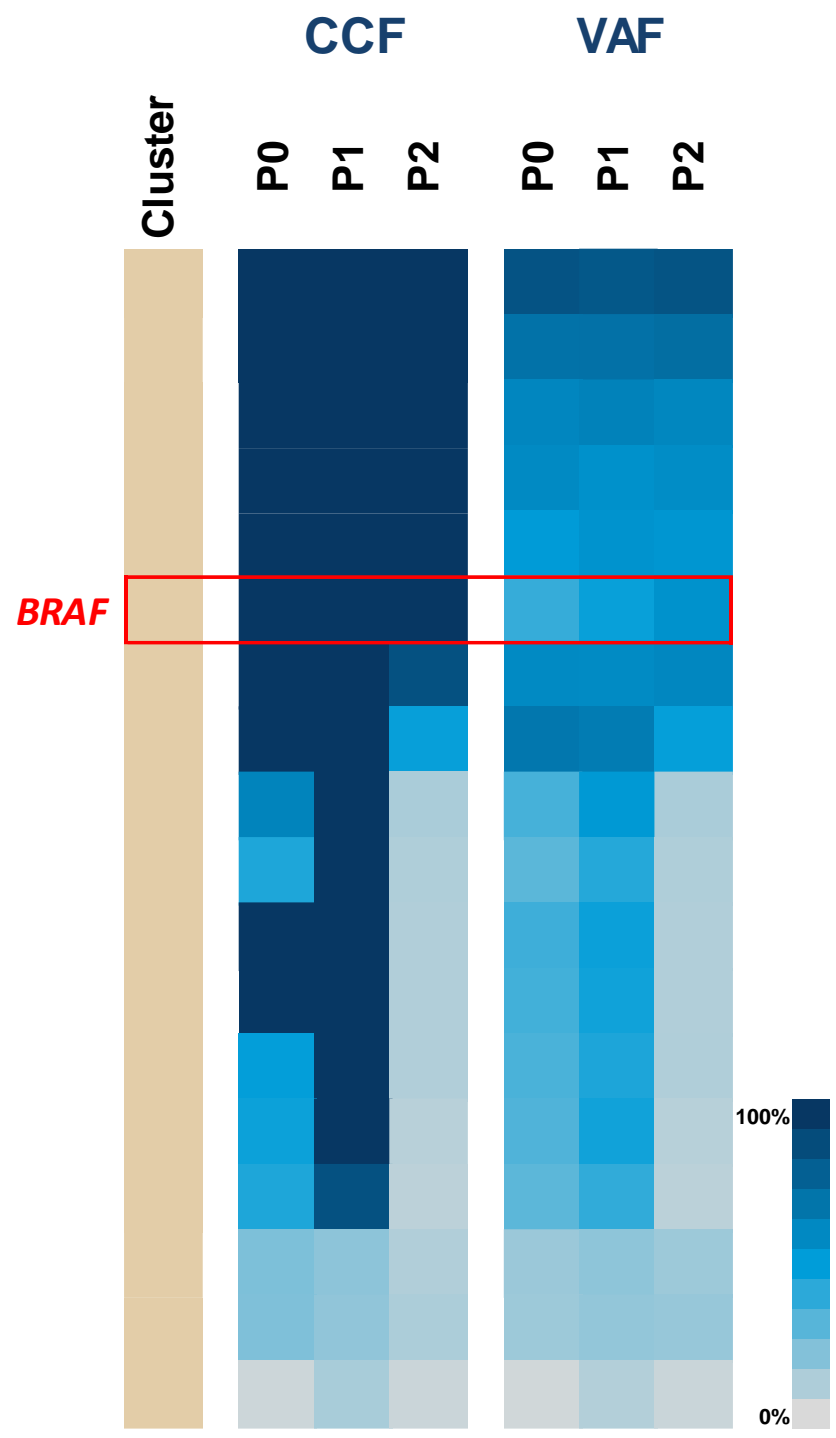

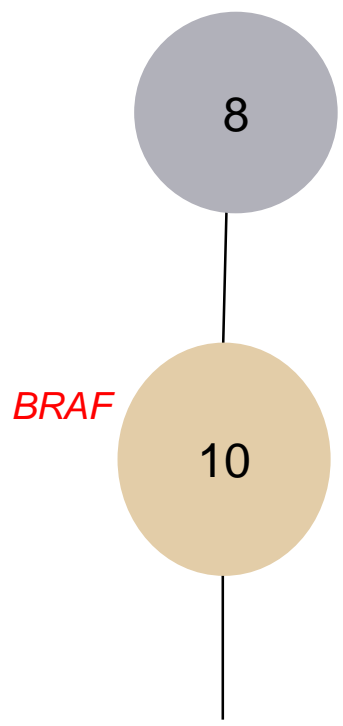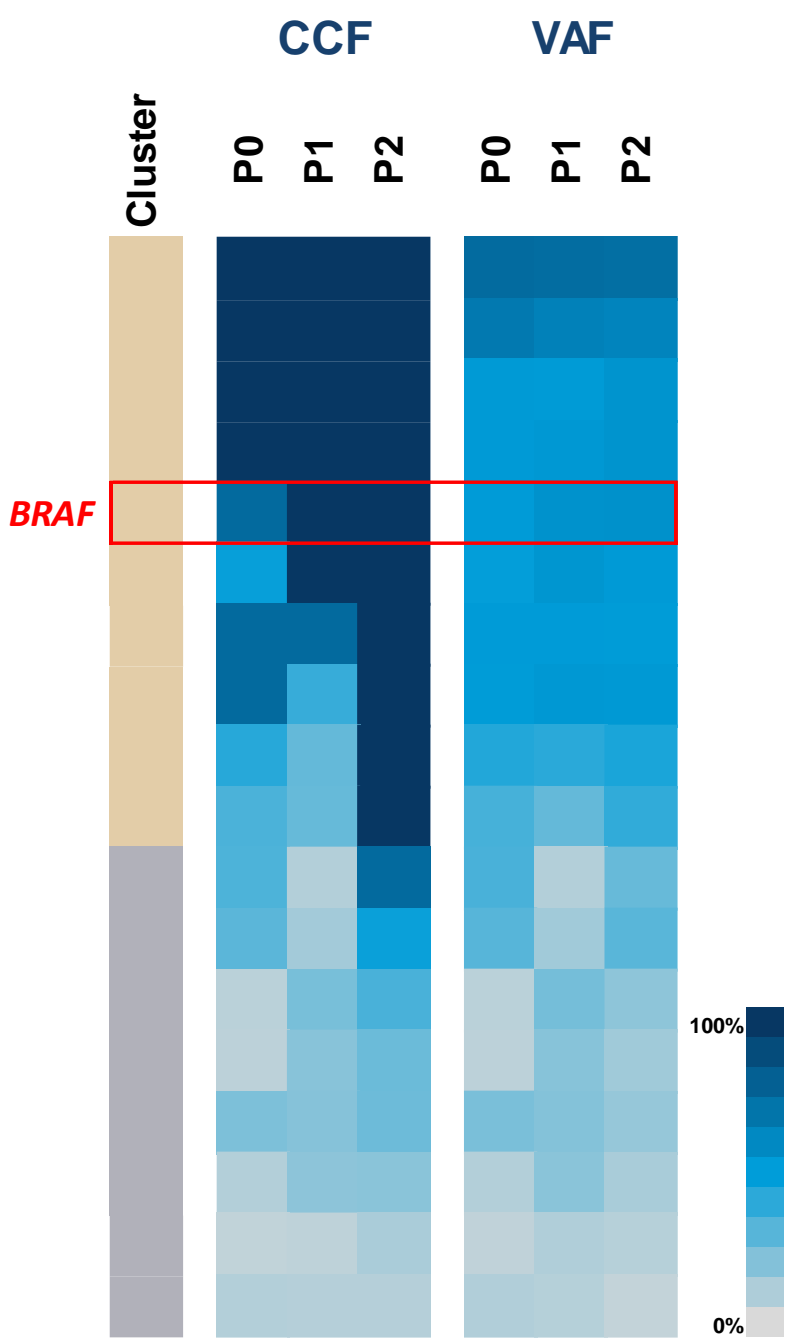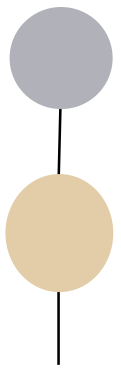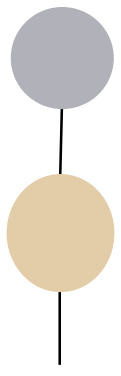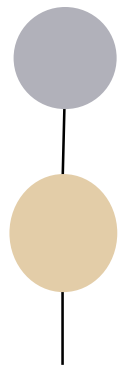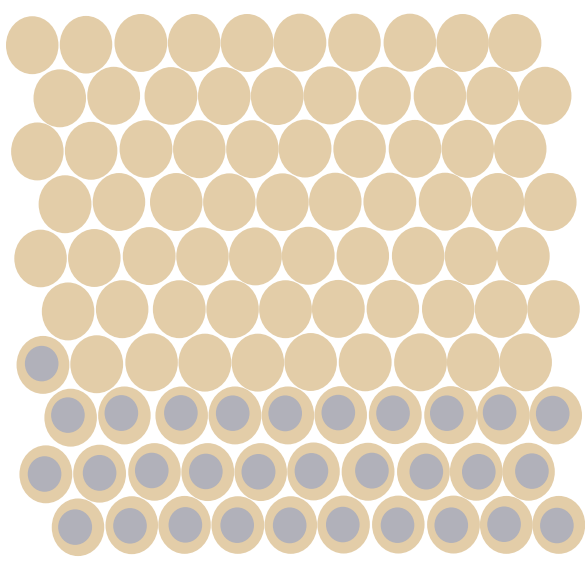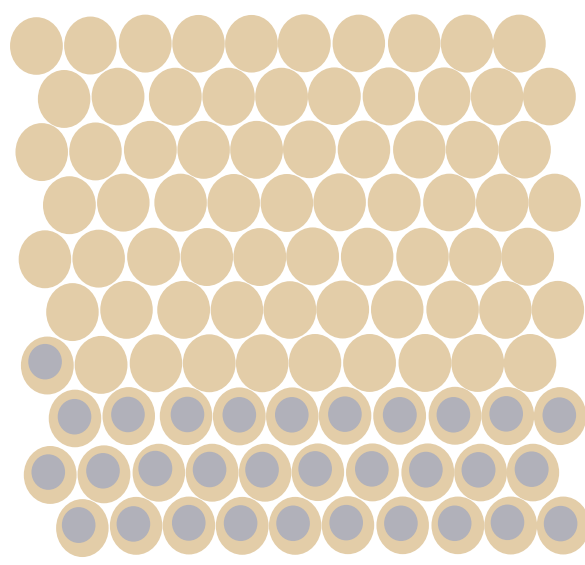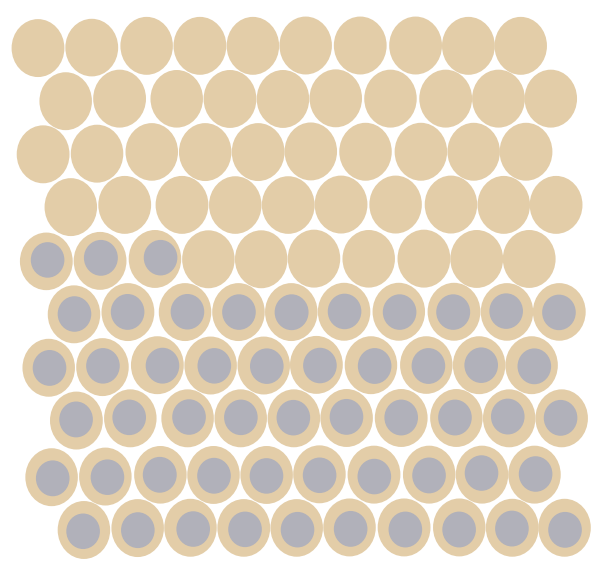

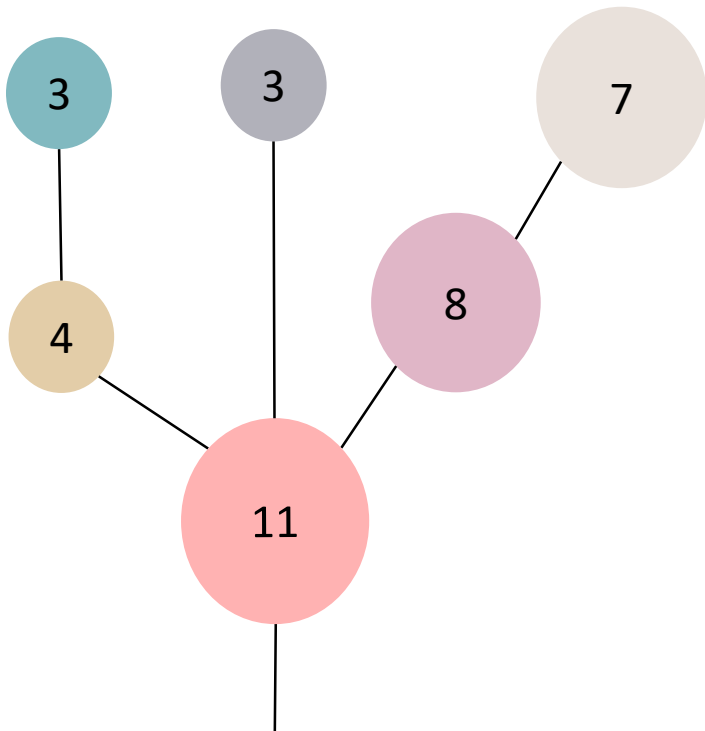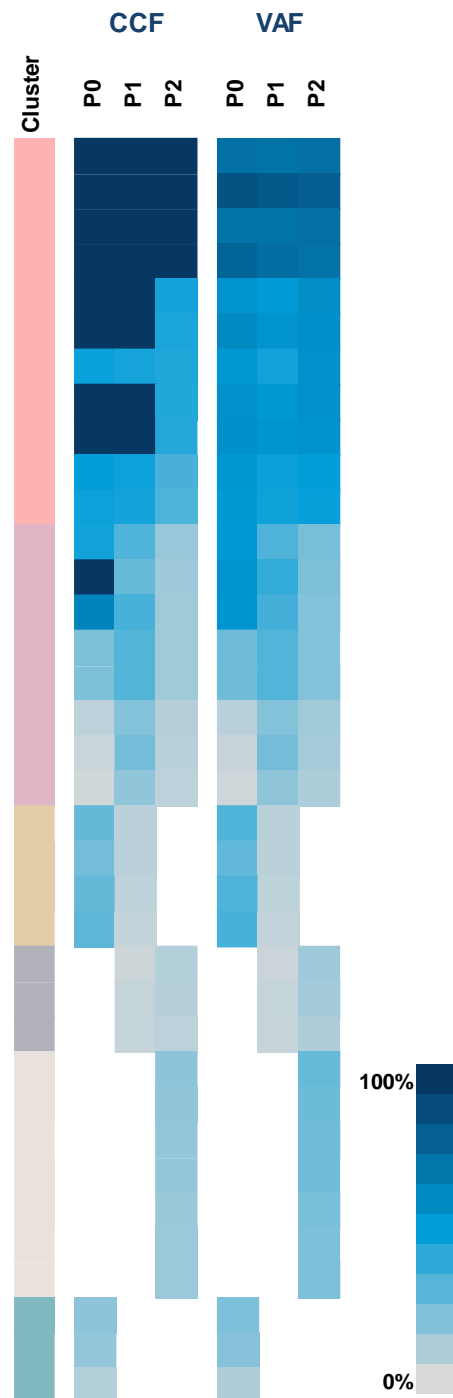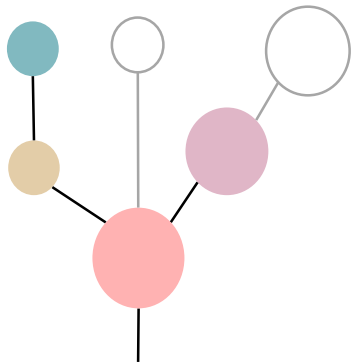

P0

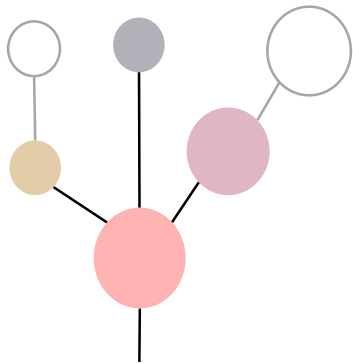

P1

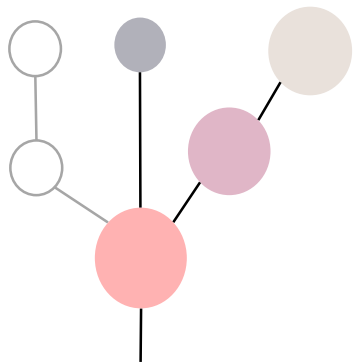

P2

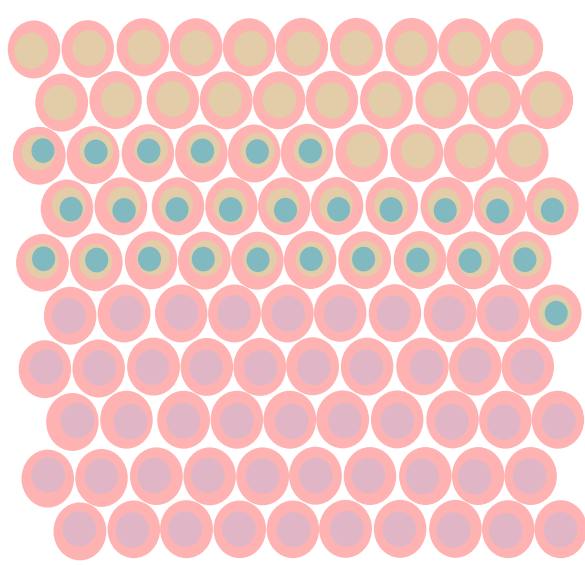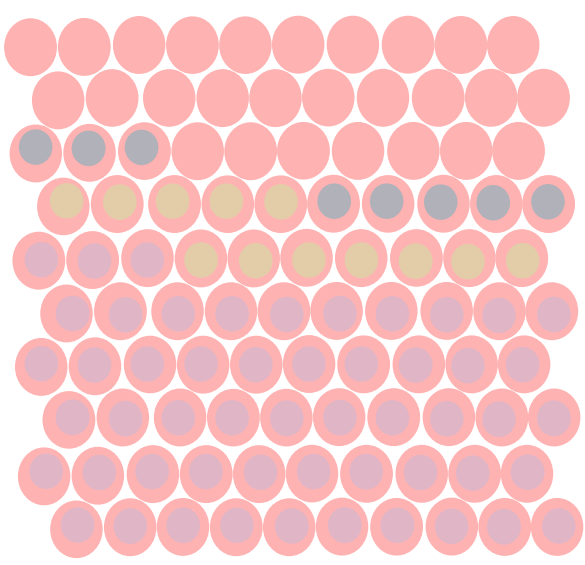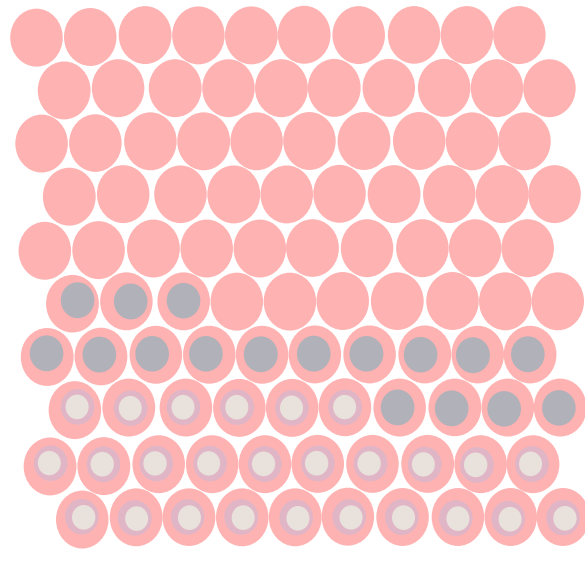







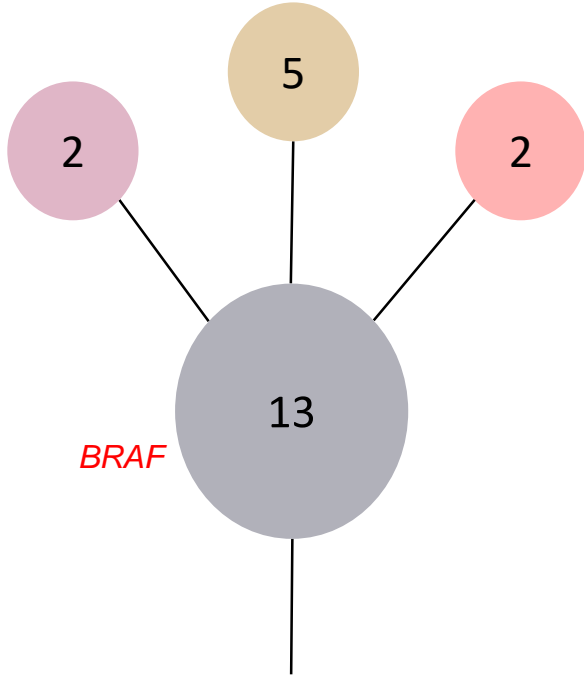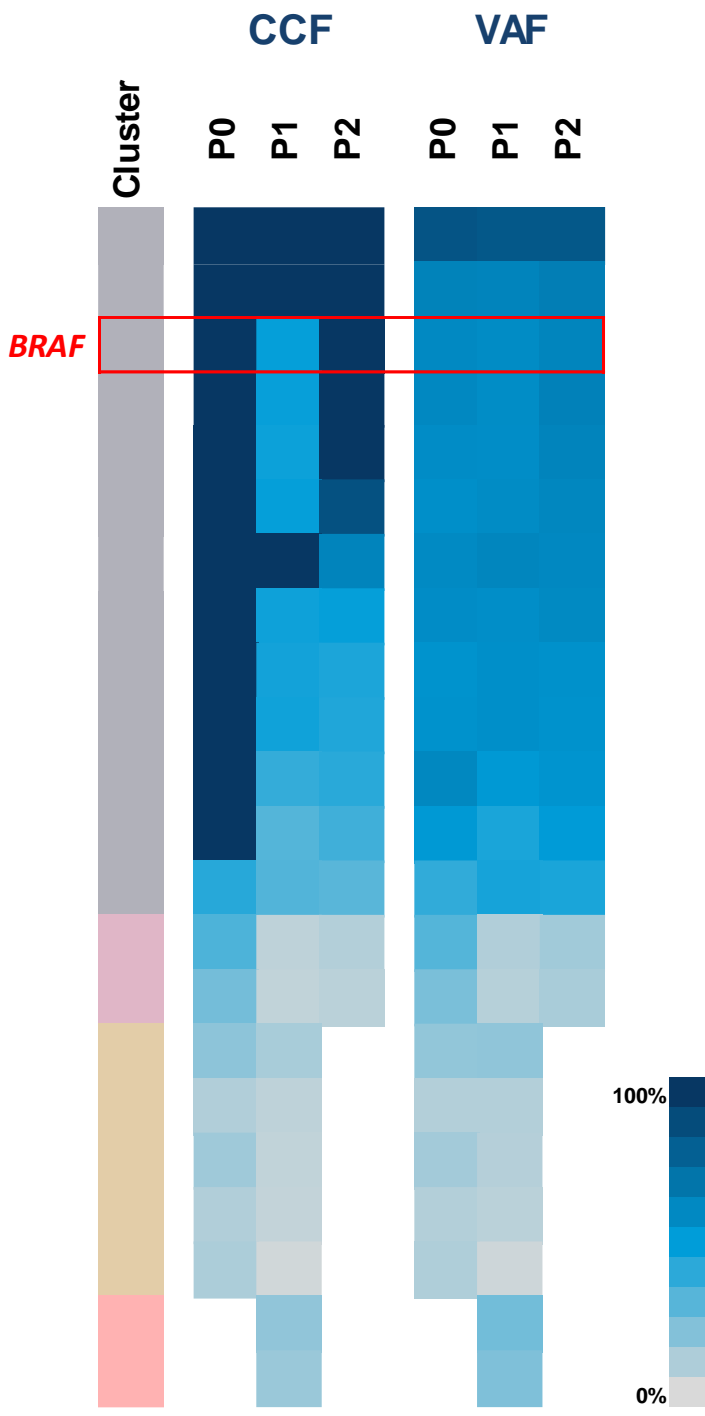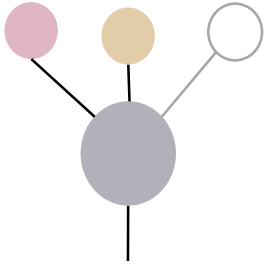

P0

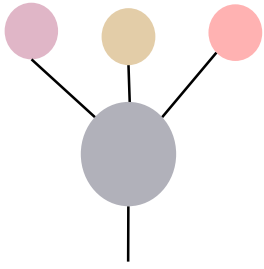

P1

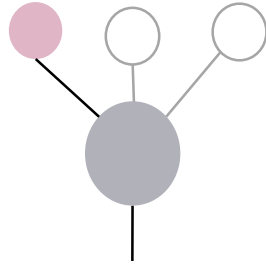

P2

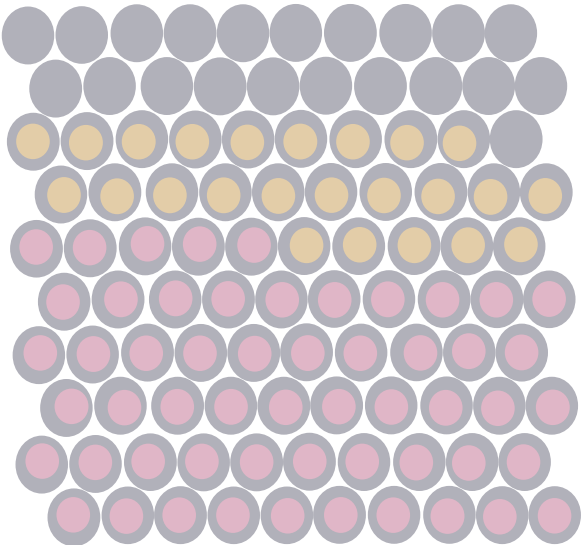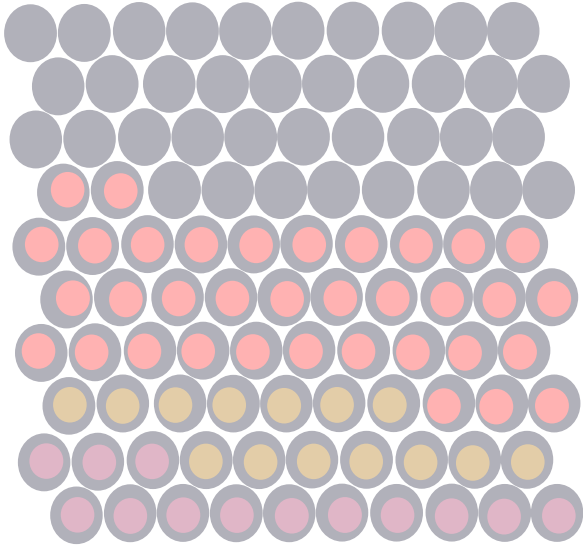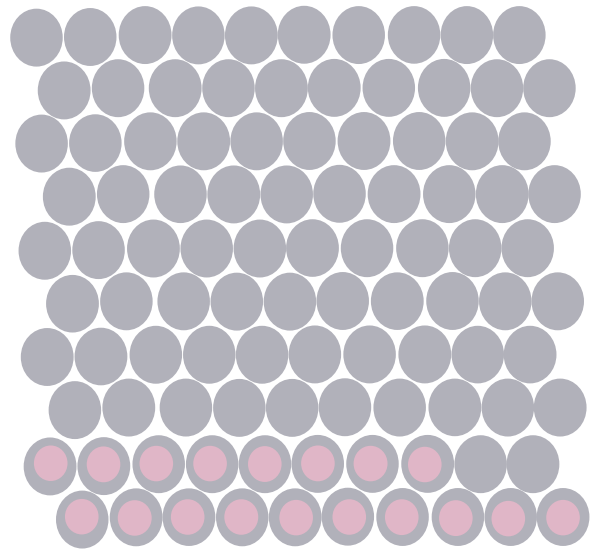



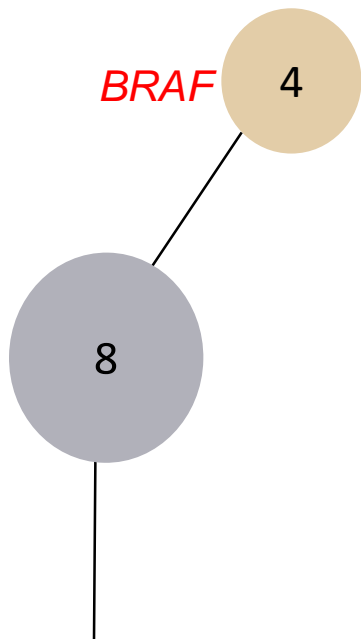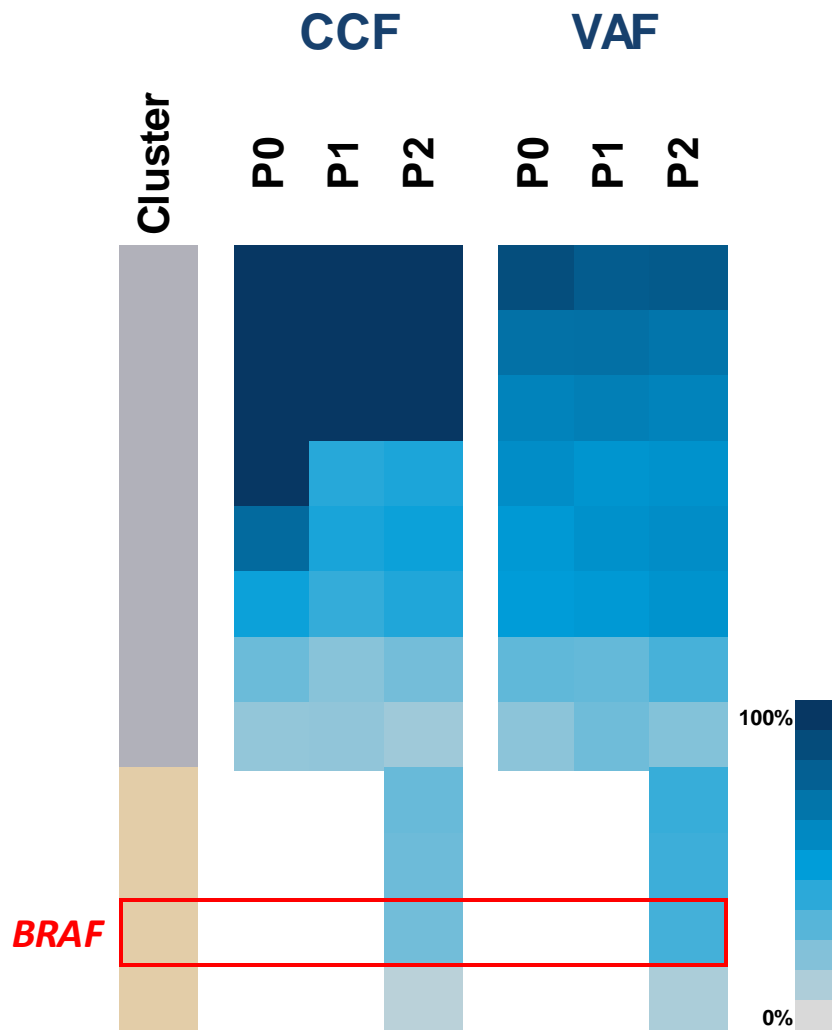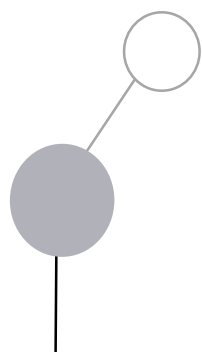

P0

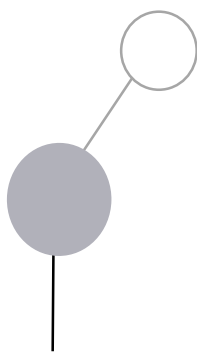

P1

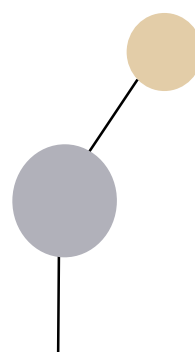

P2

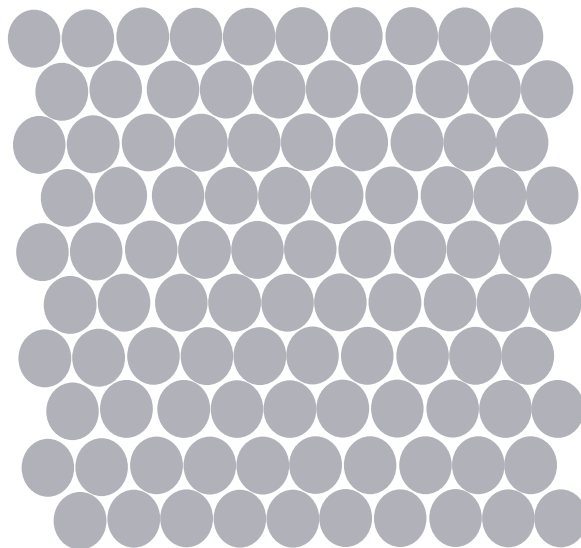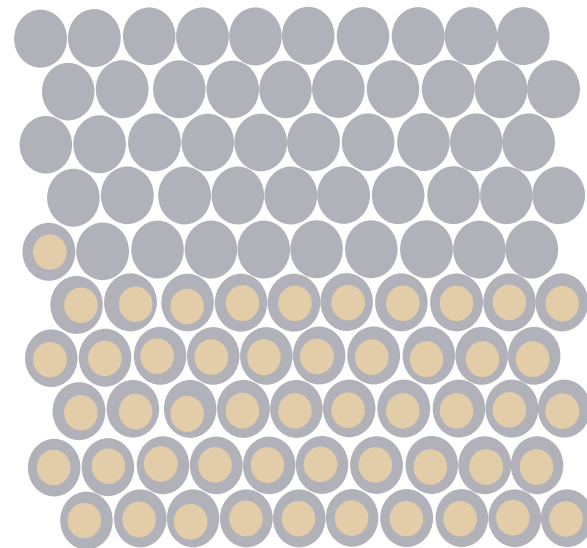

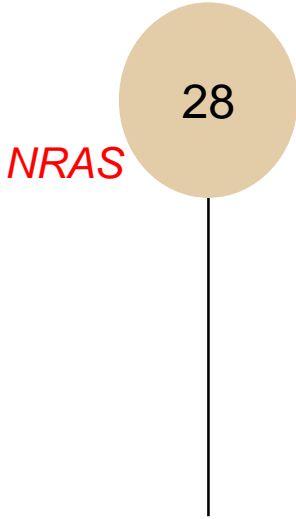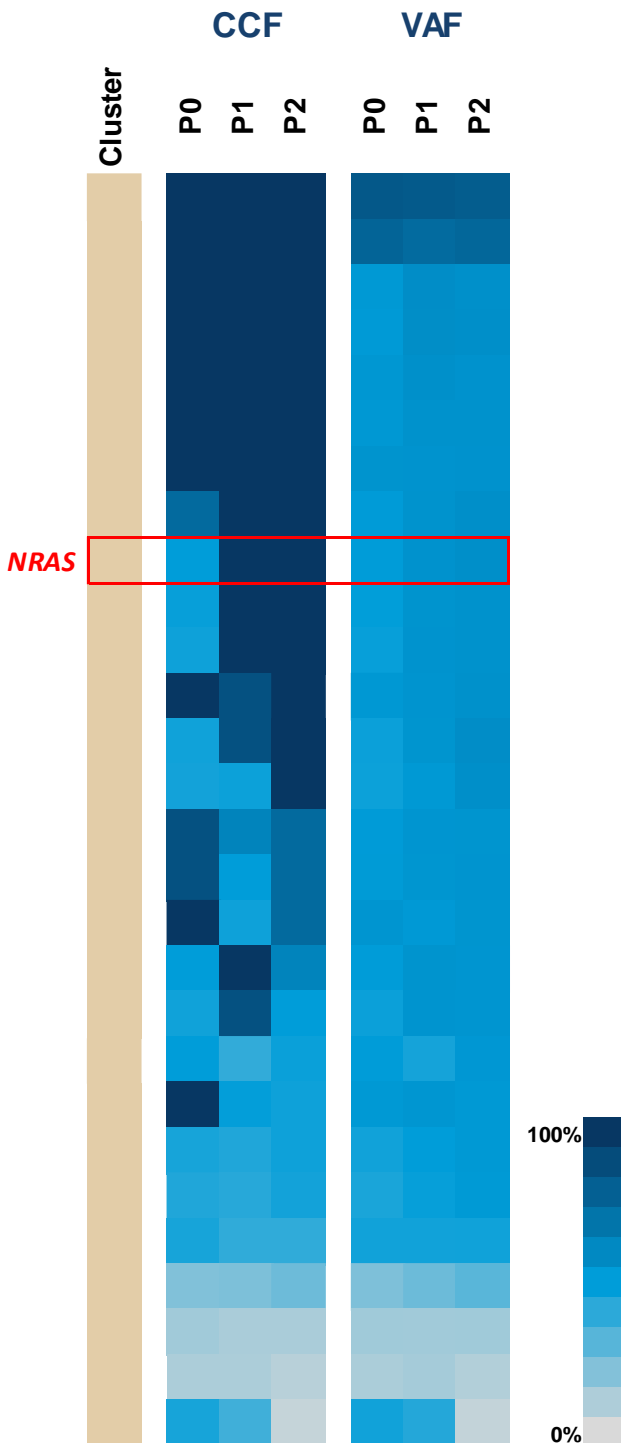

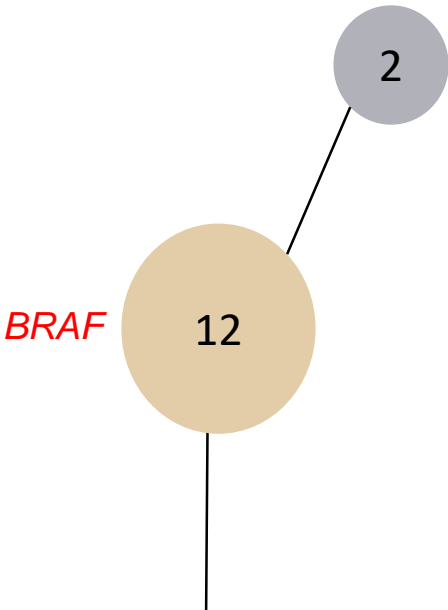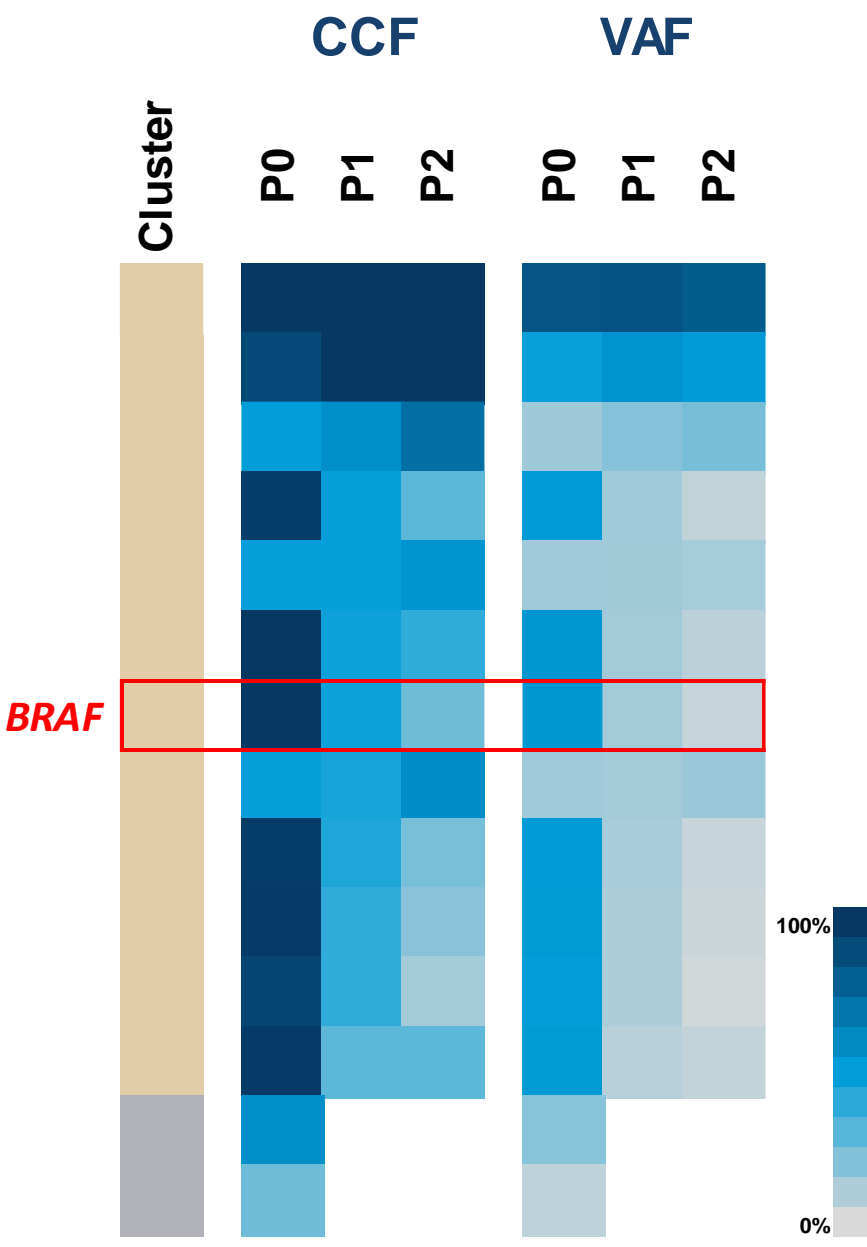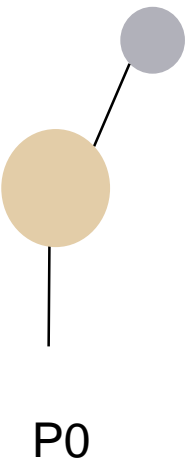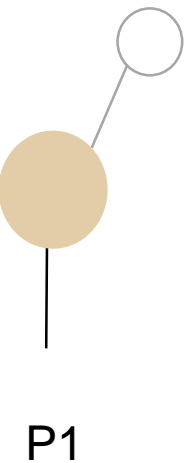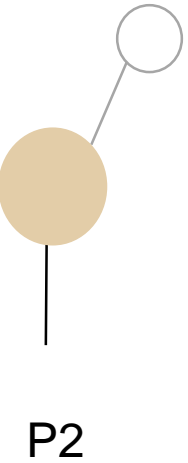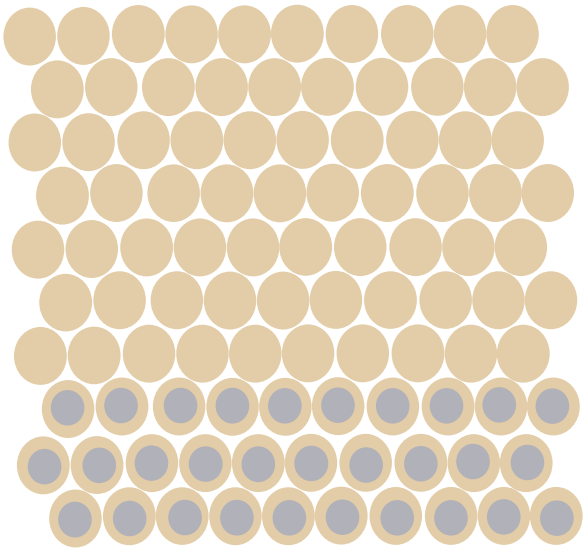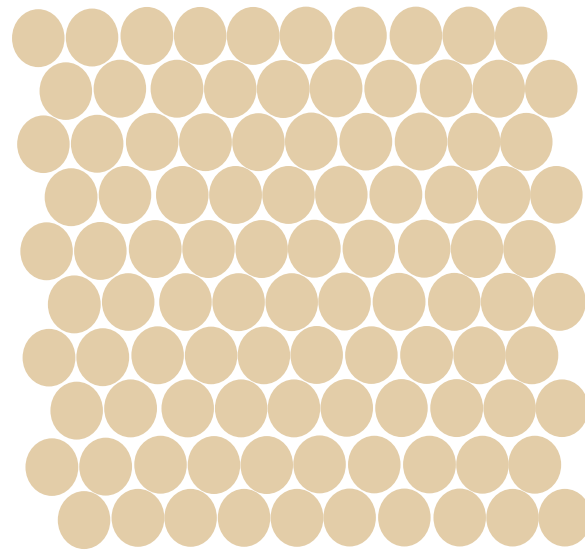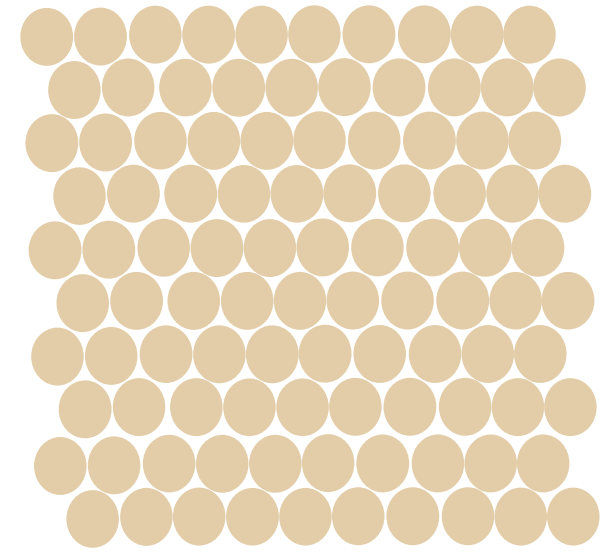

Cluster  
 Gene Type  
 MUC4 Amp

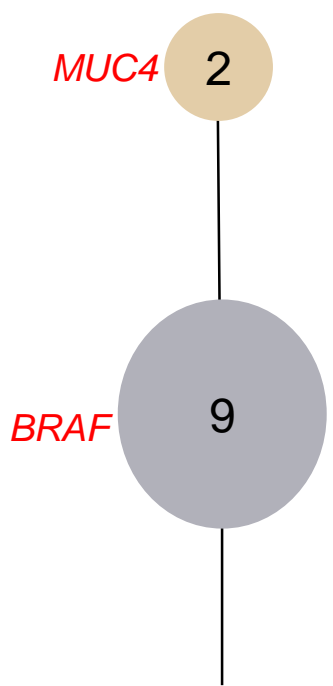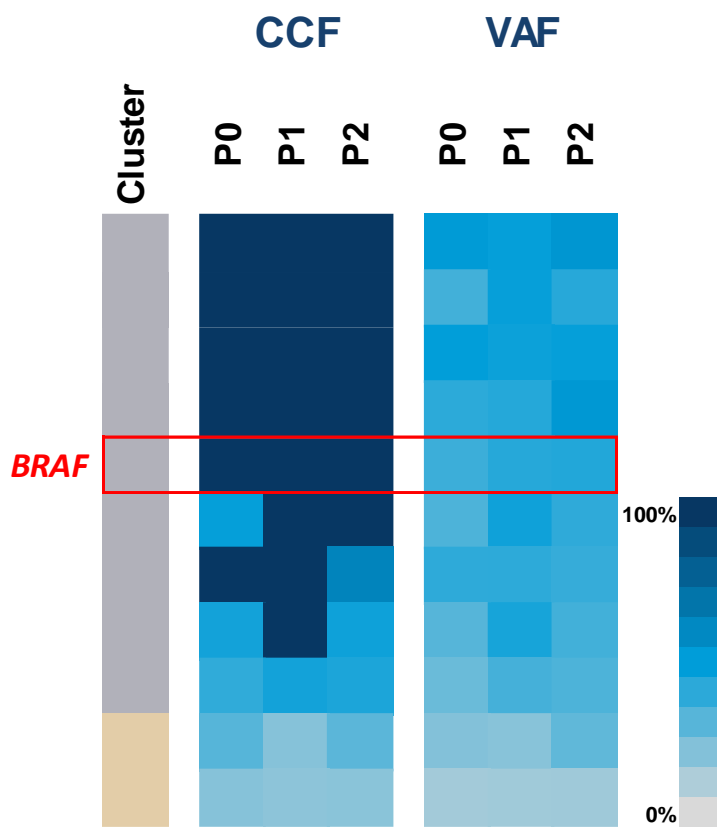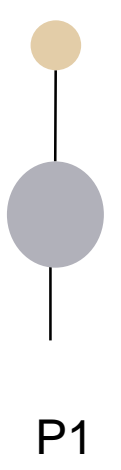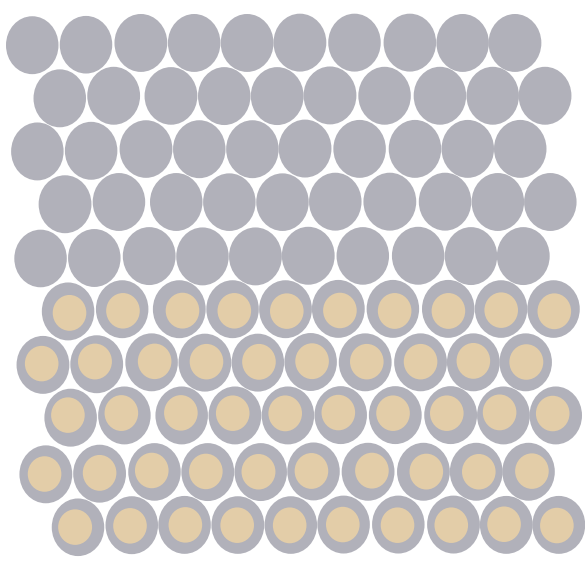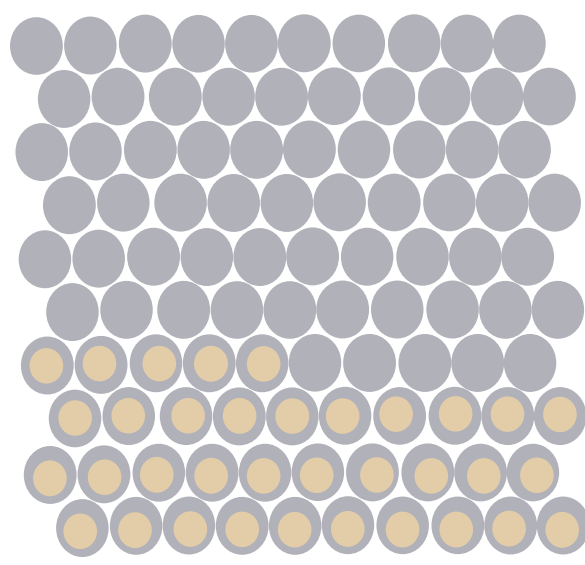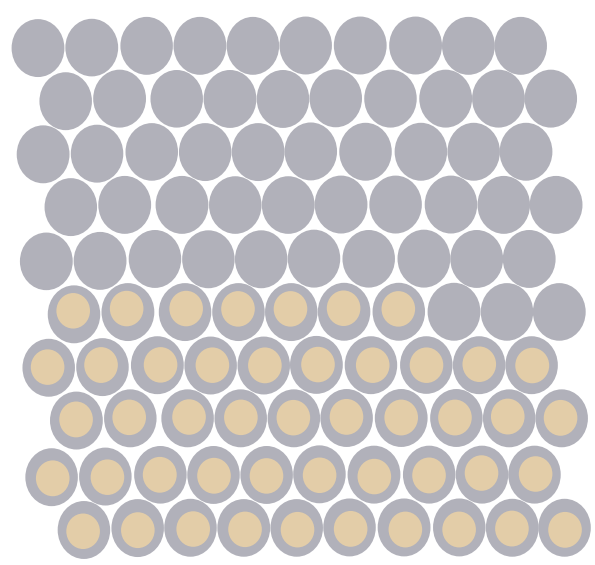



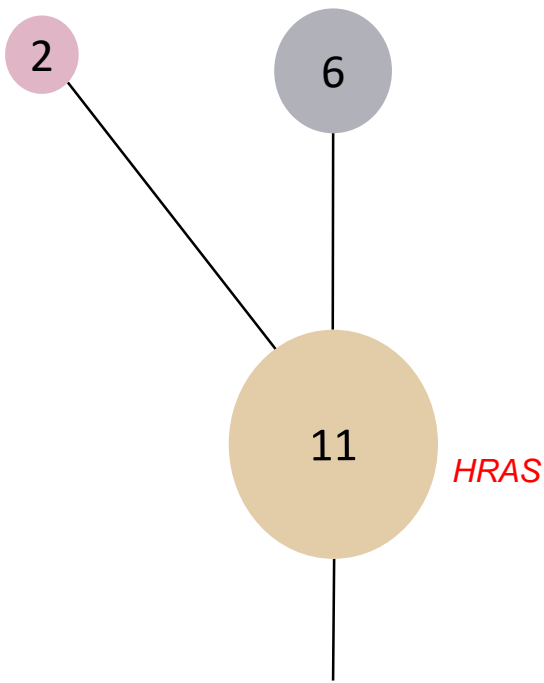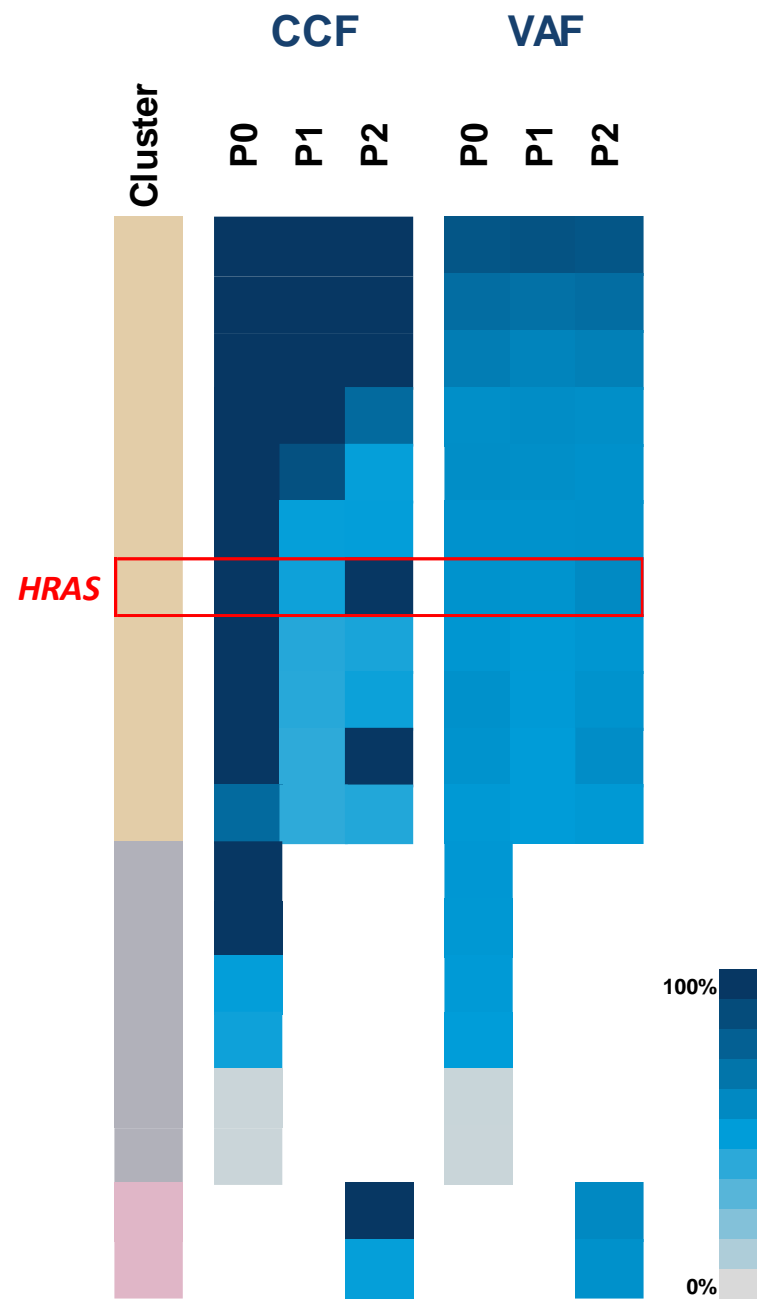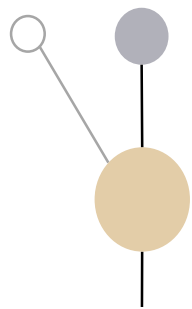

P0

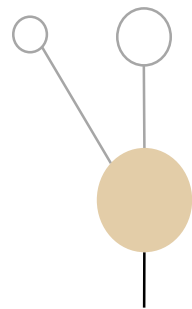

P1

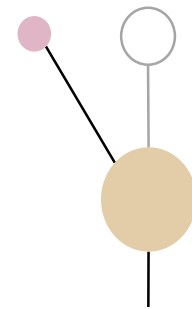

P2

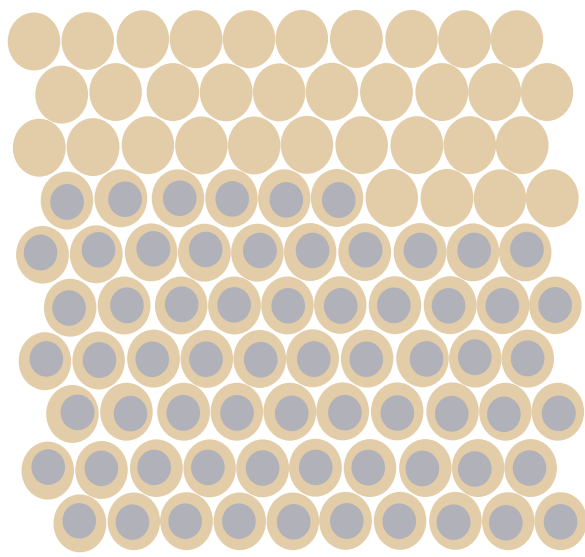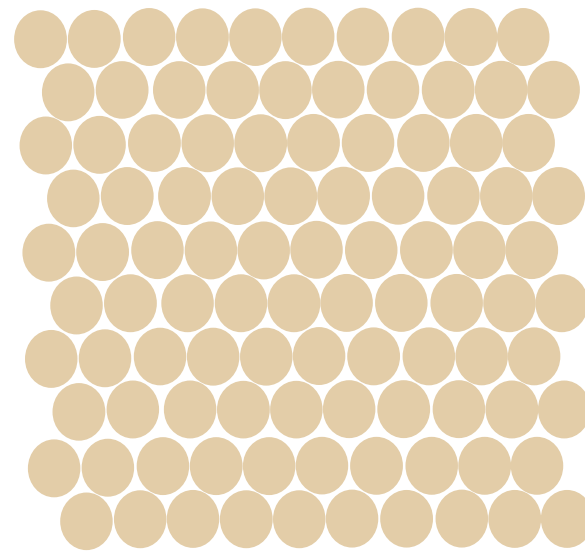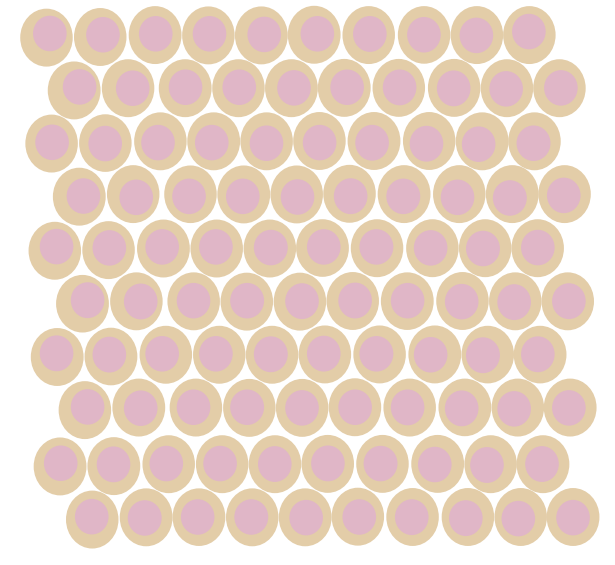

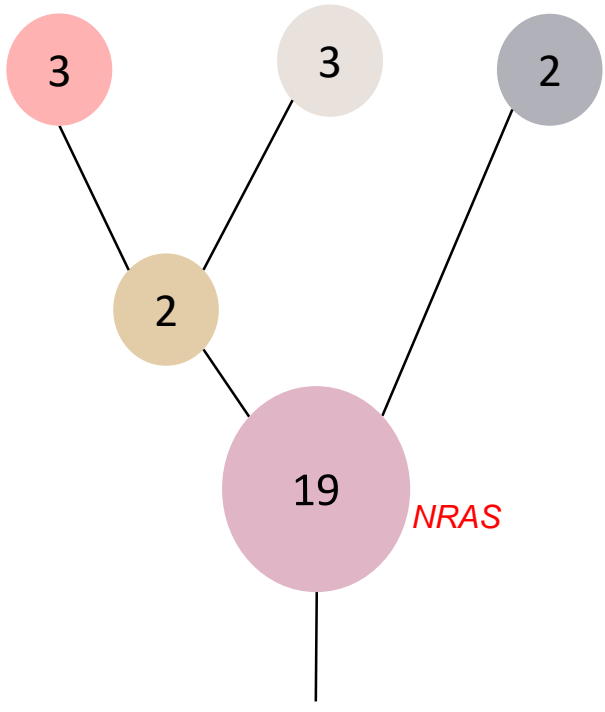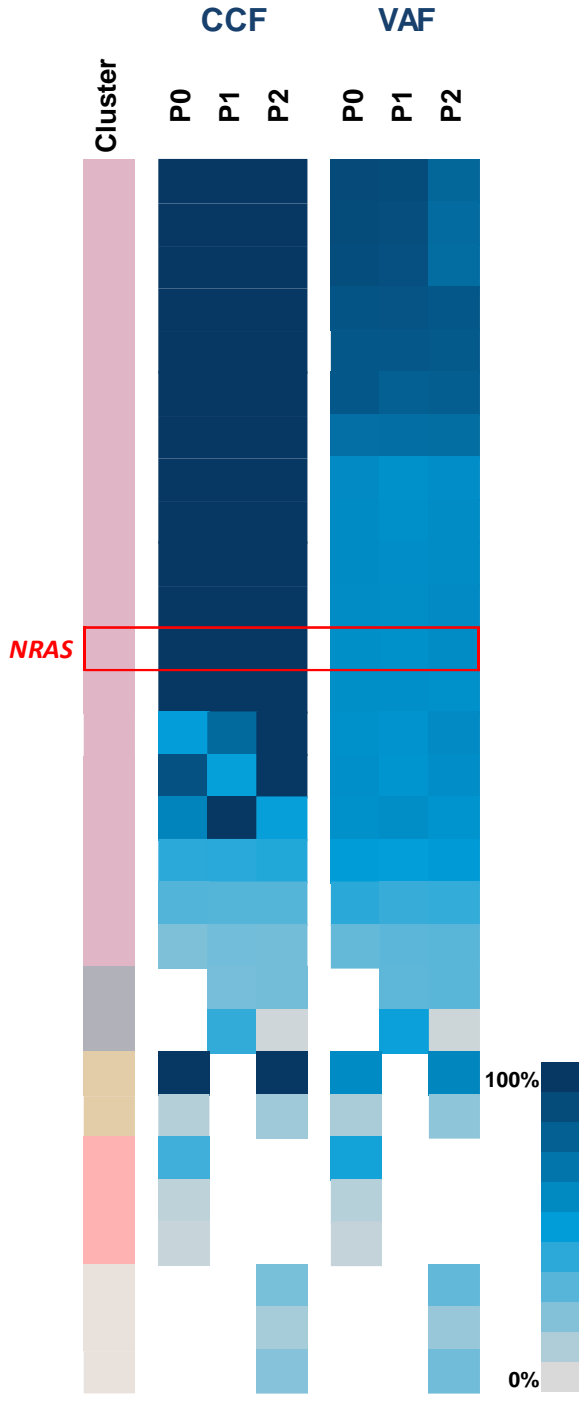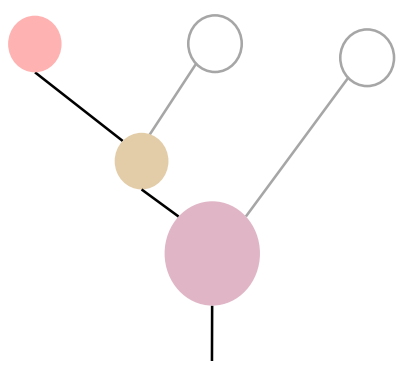

P0

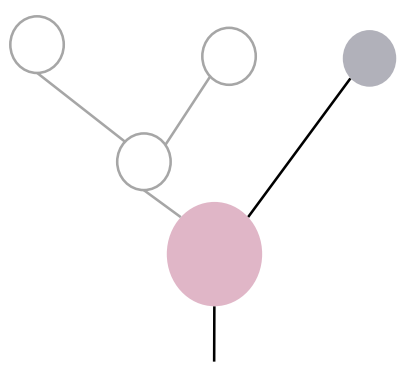

P1

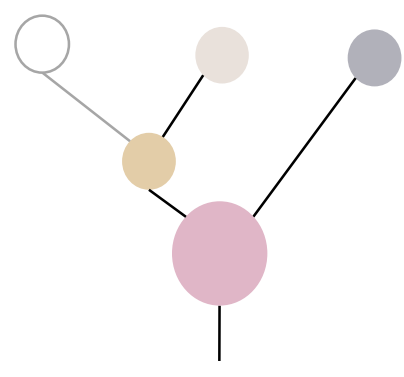

P2

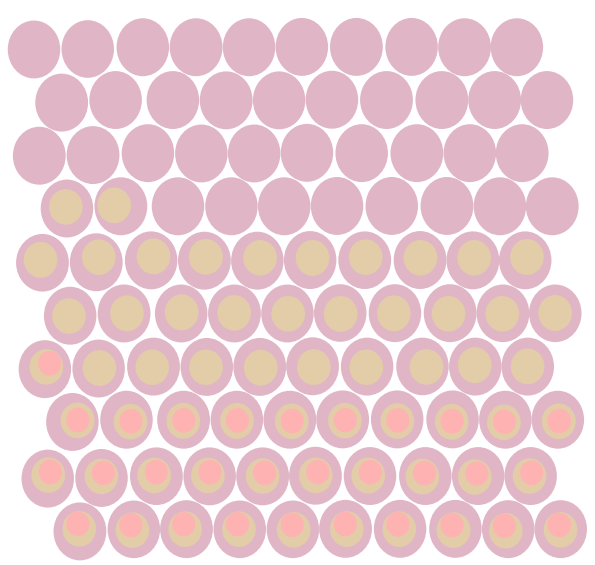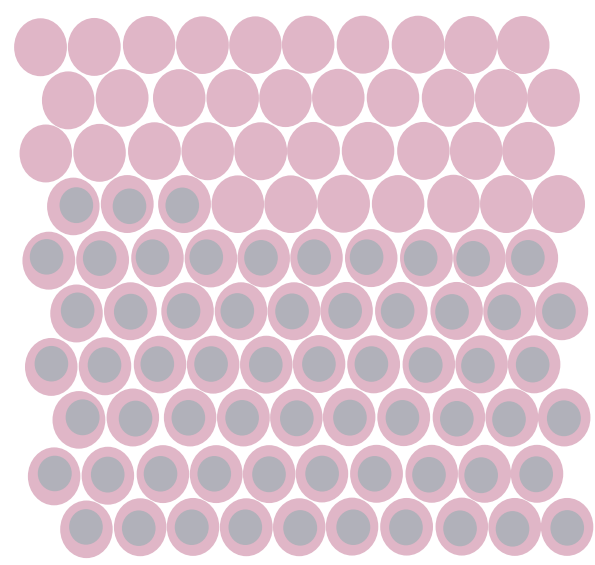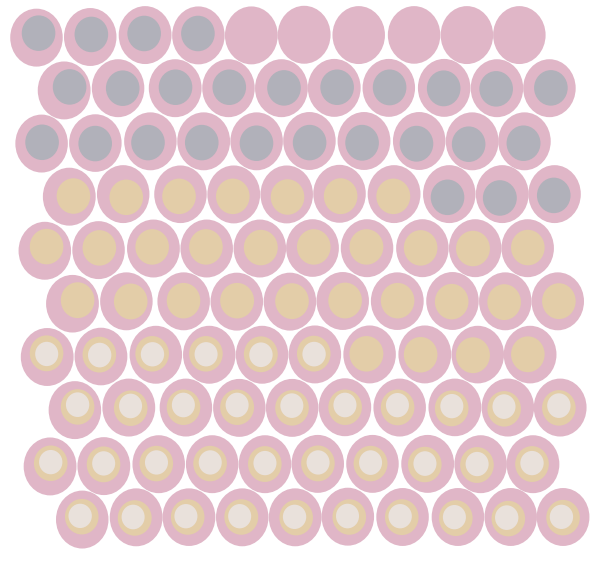

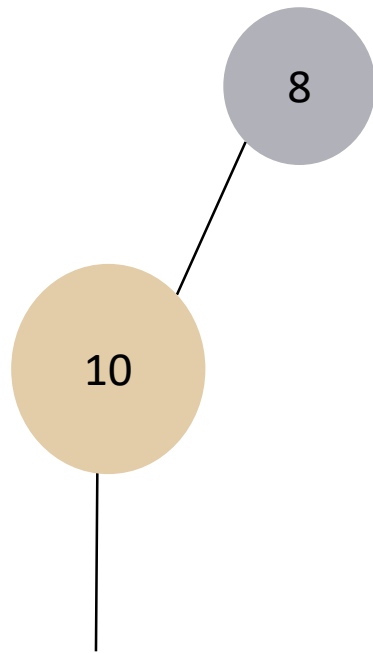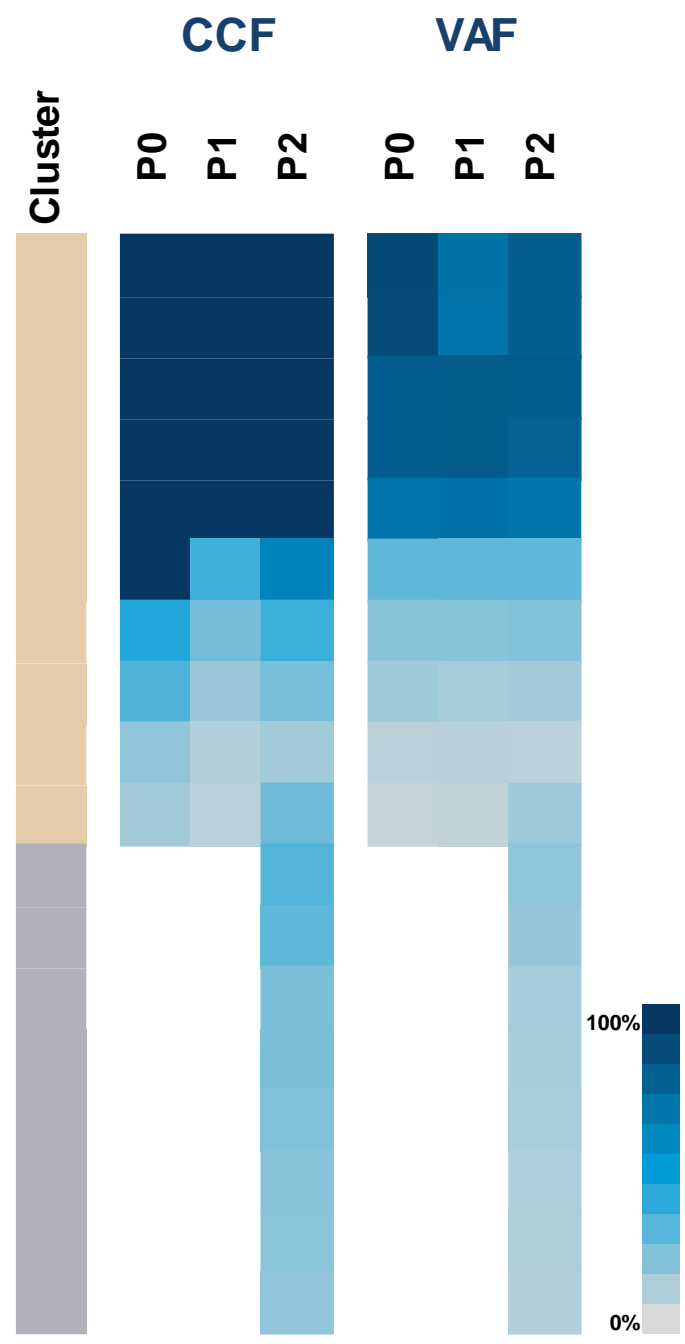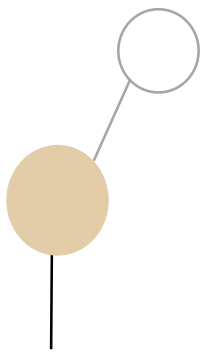

P0

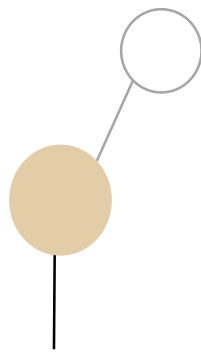

P1

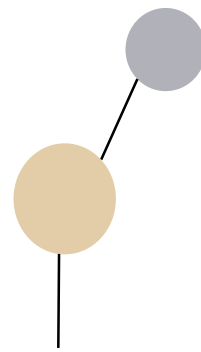

P2

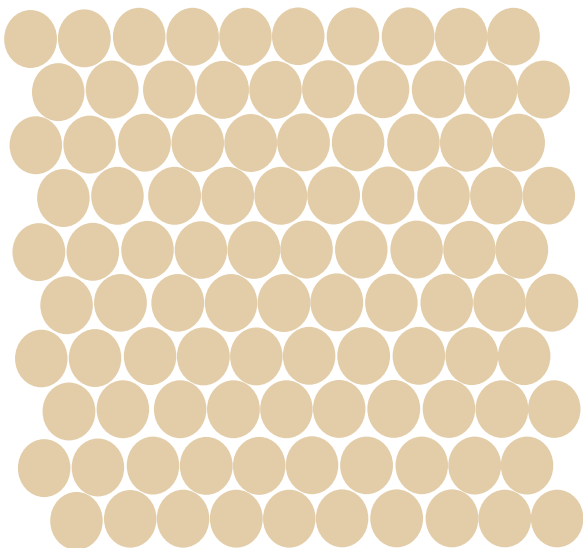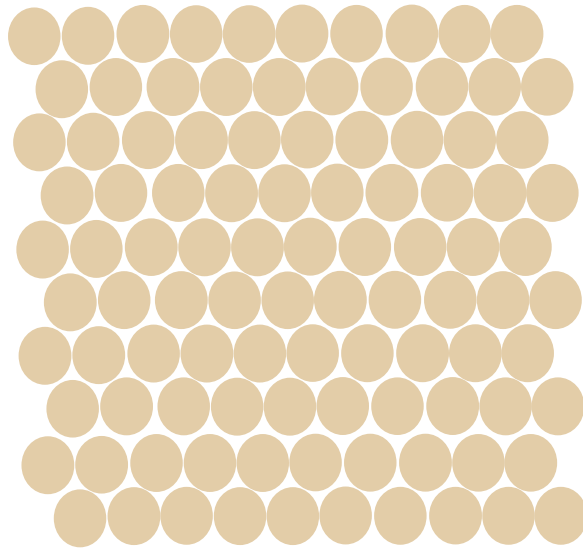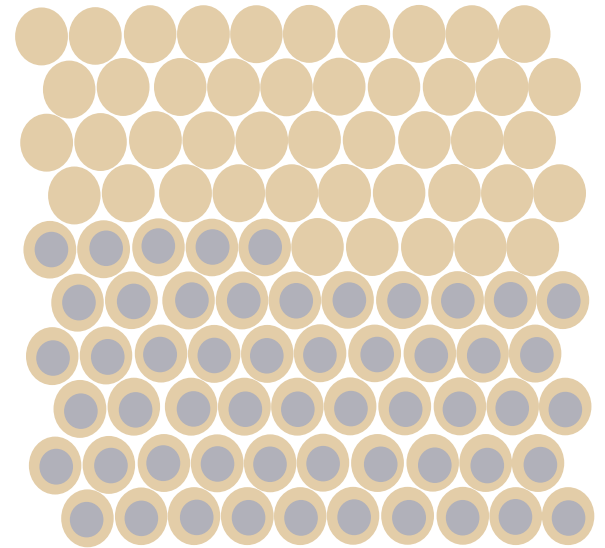

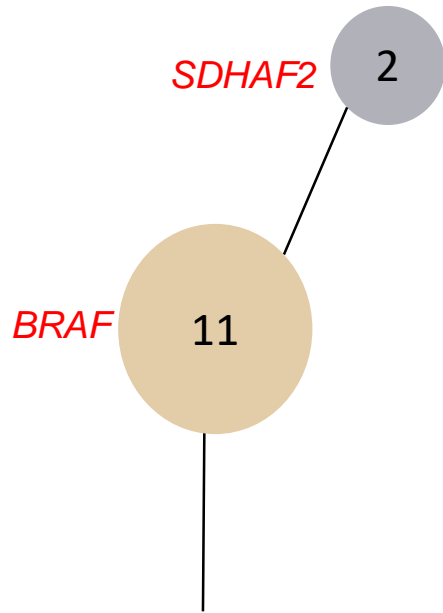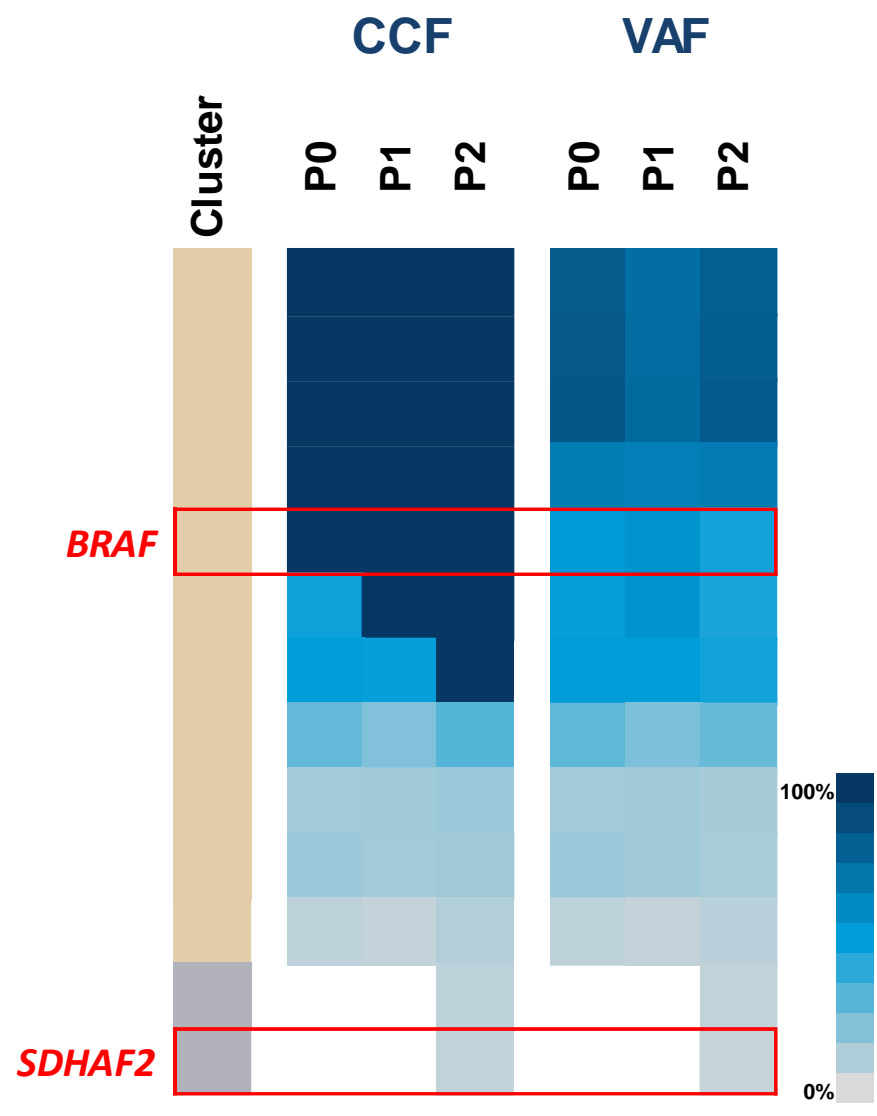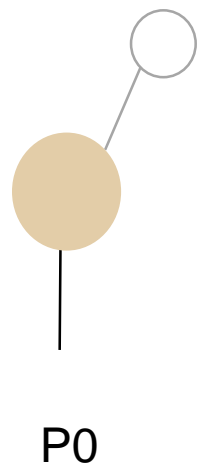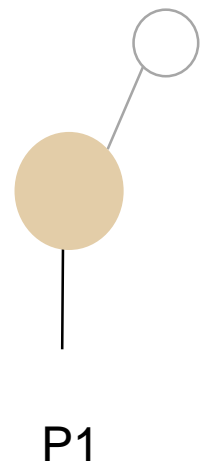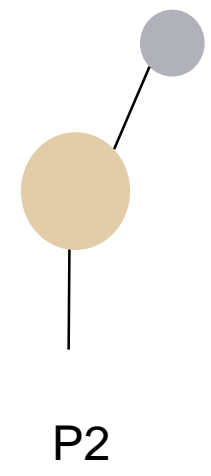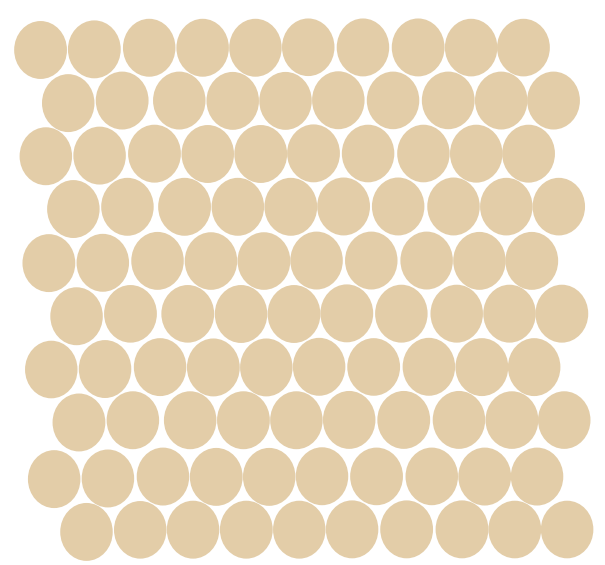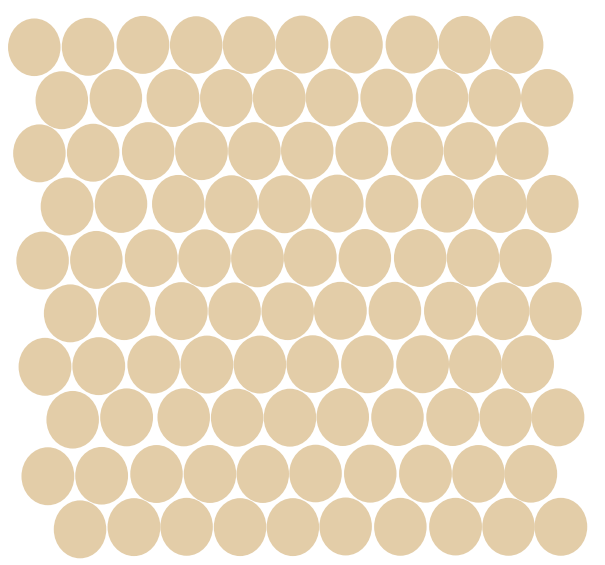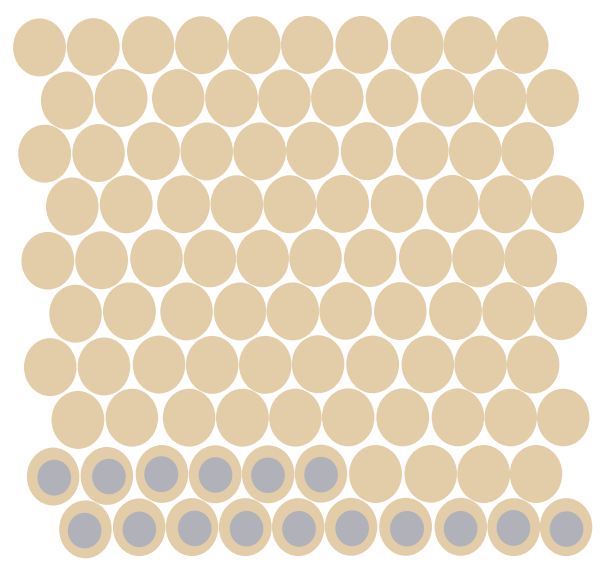



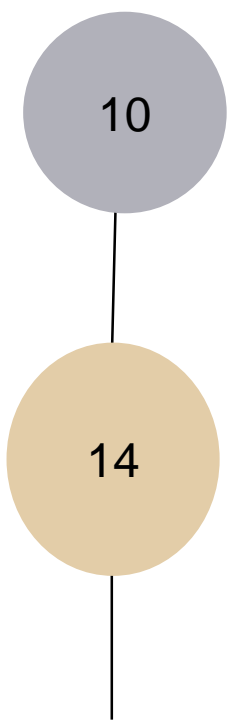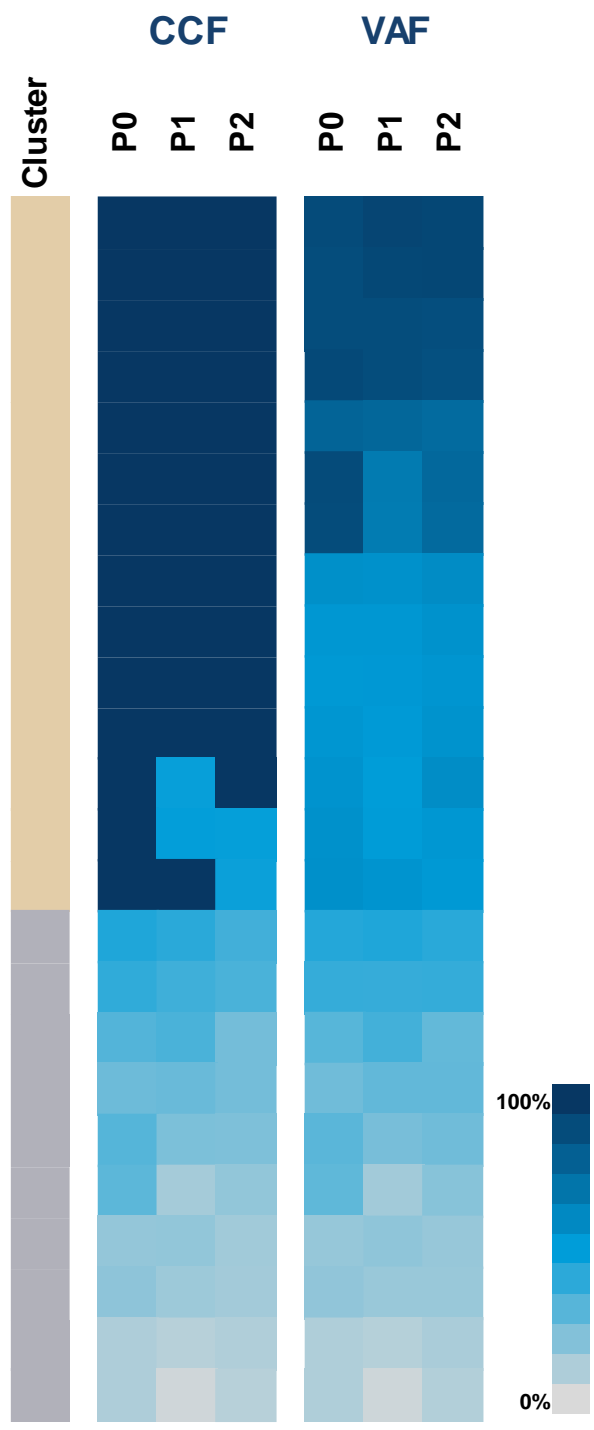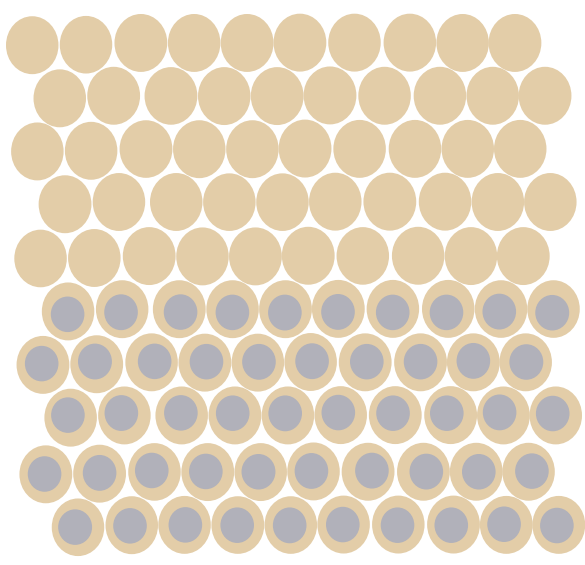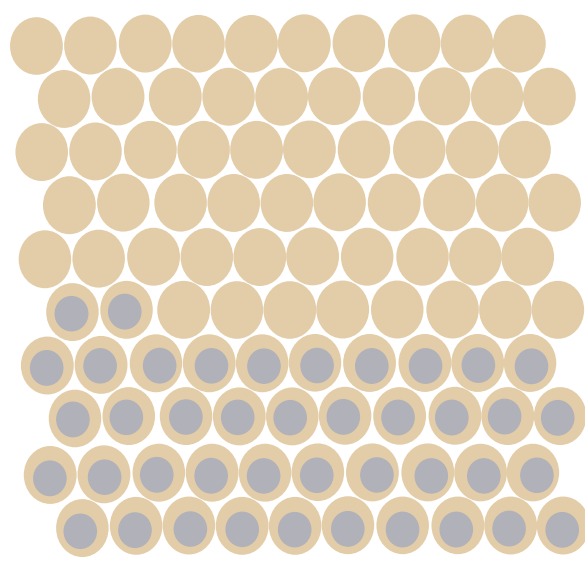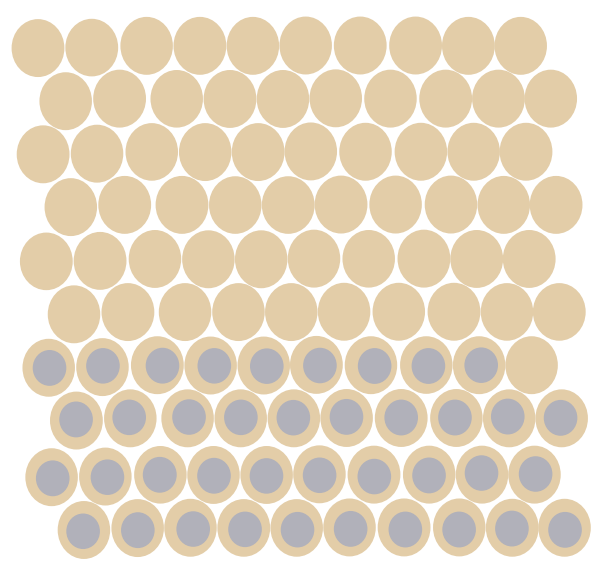

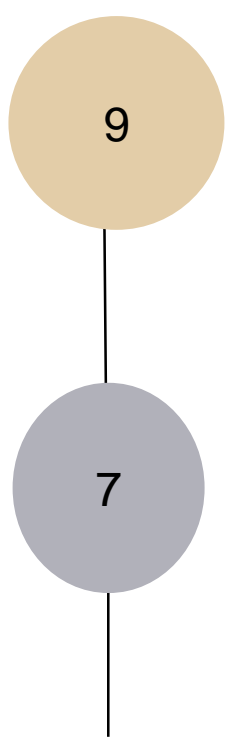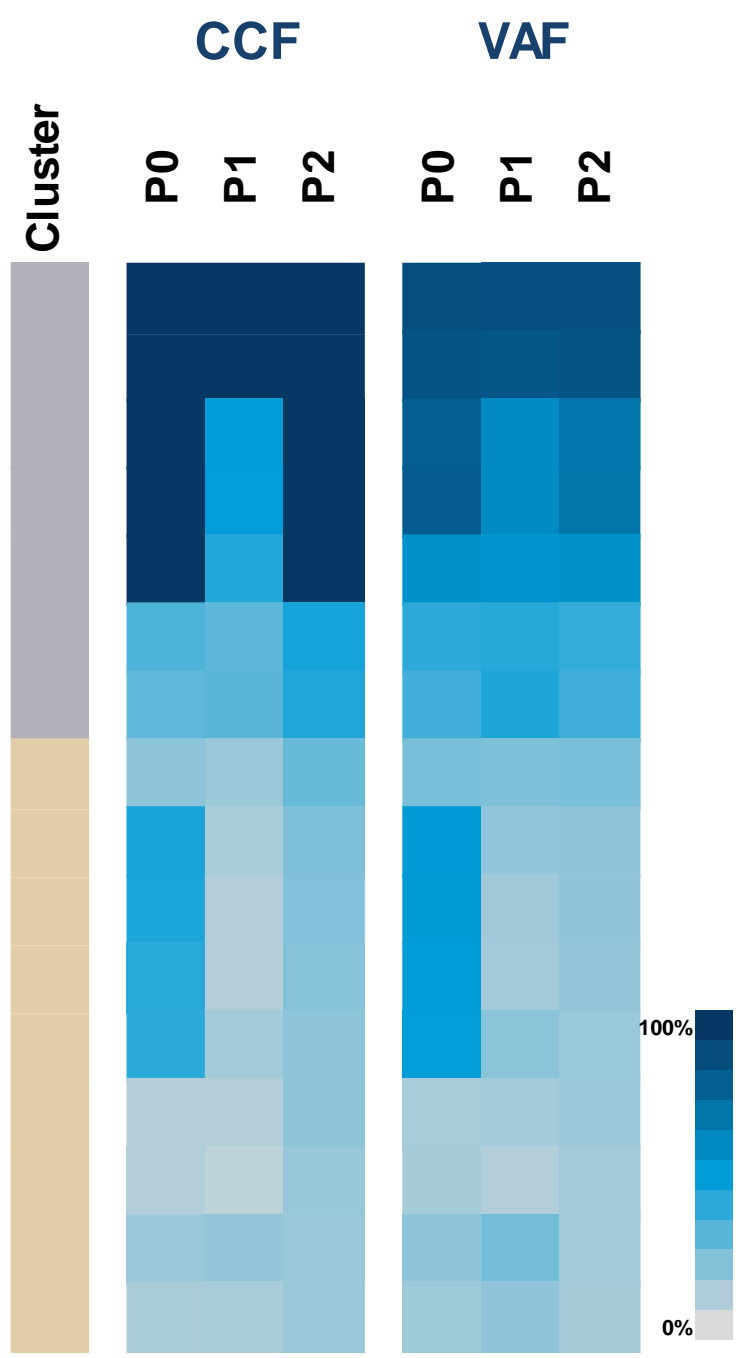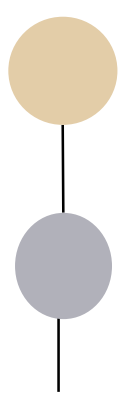

P0

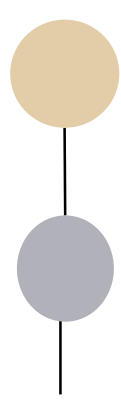

P1

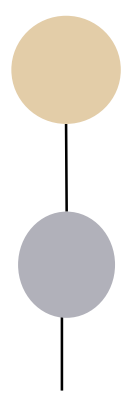

P2

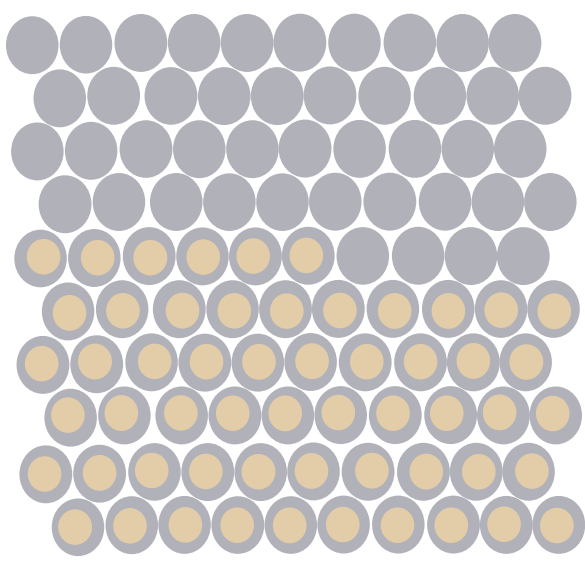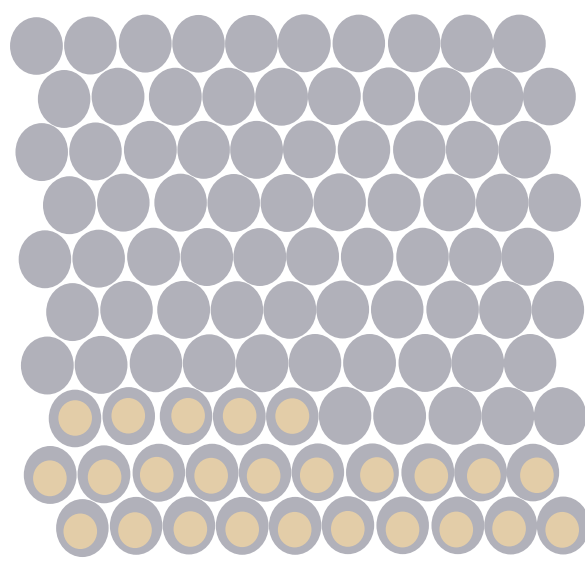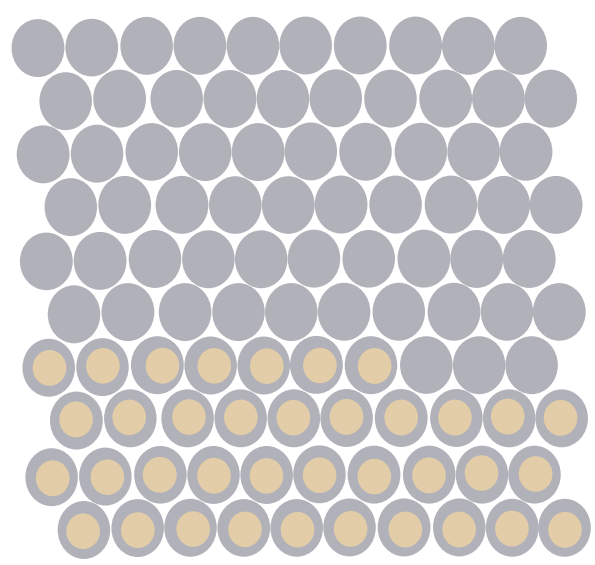

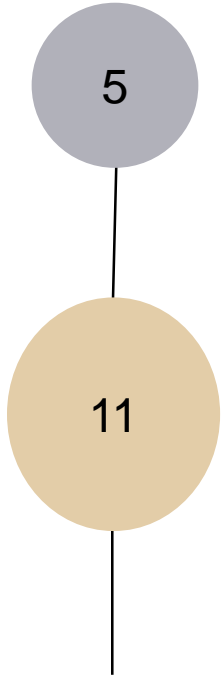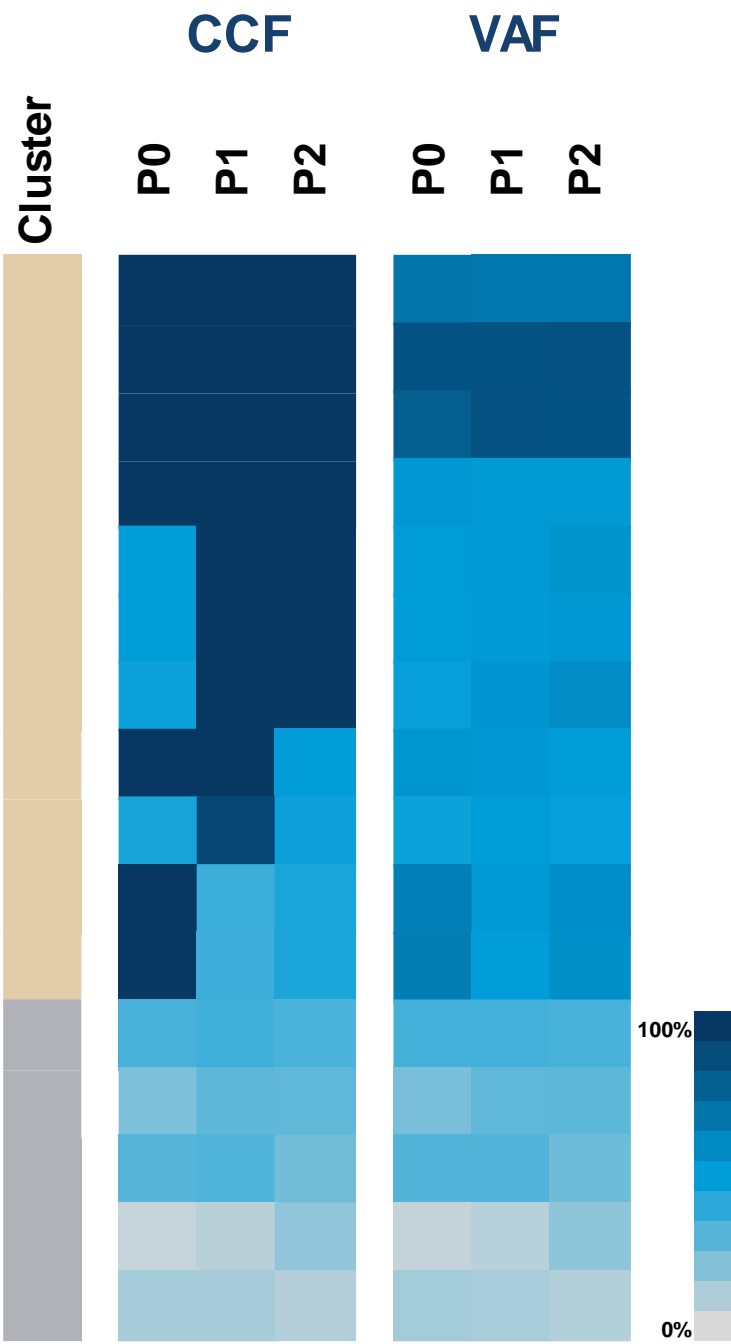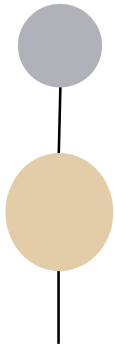

P0

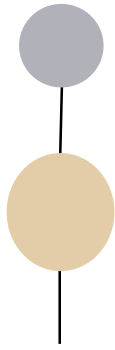

P1

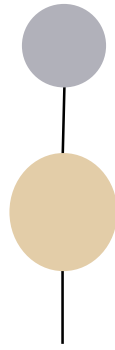

P2

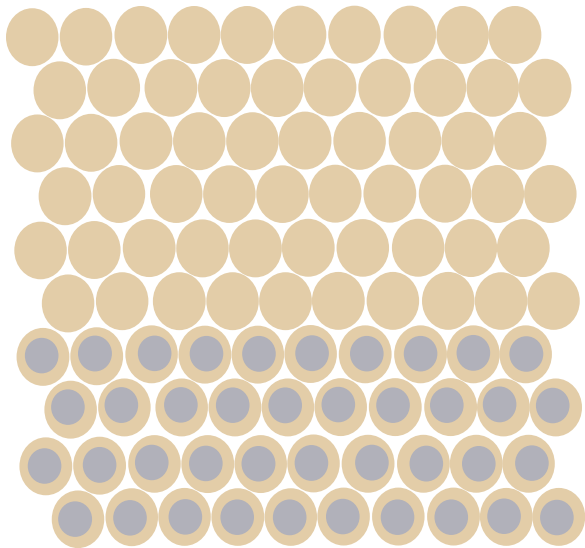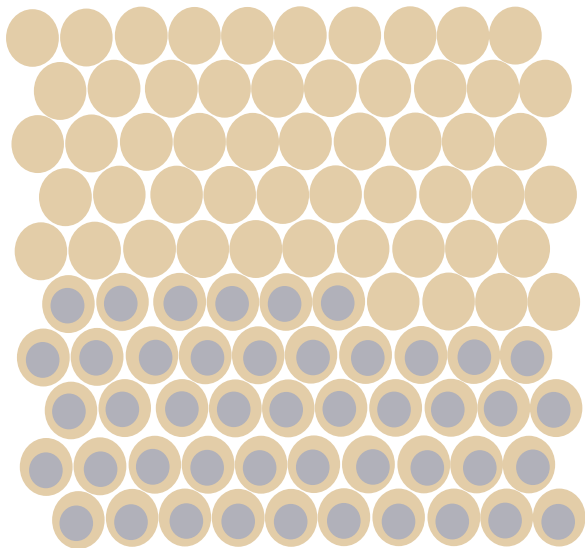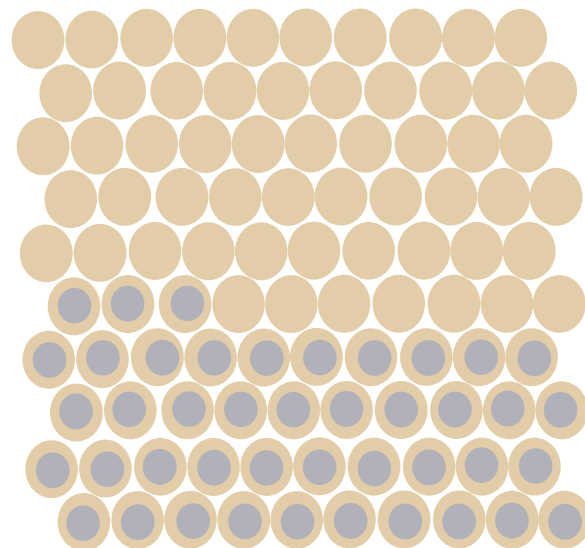



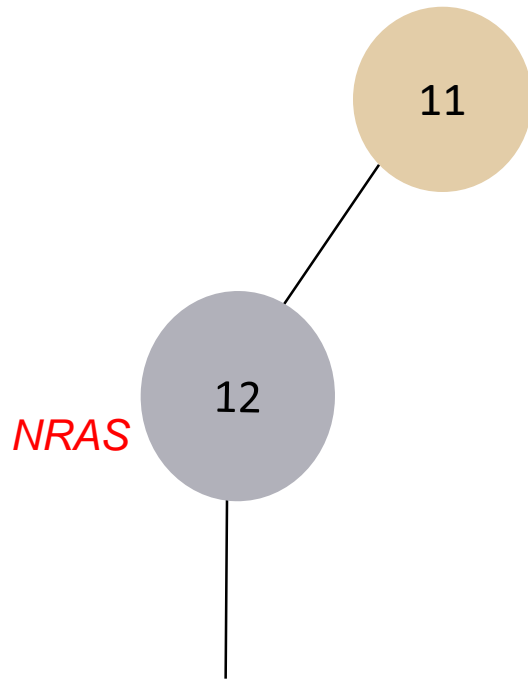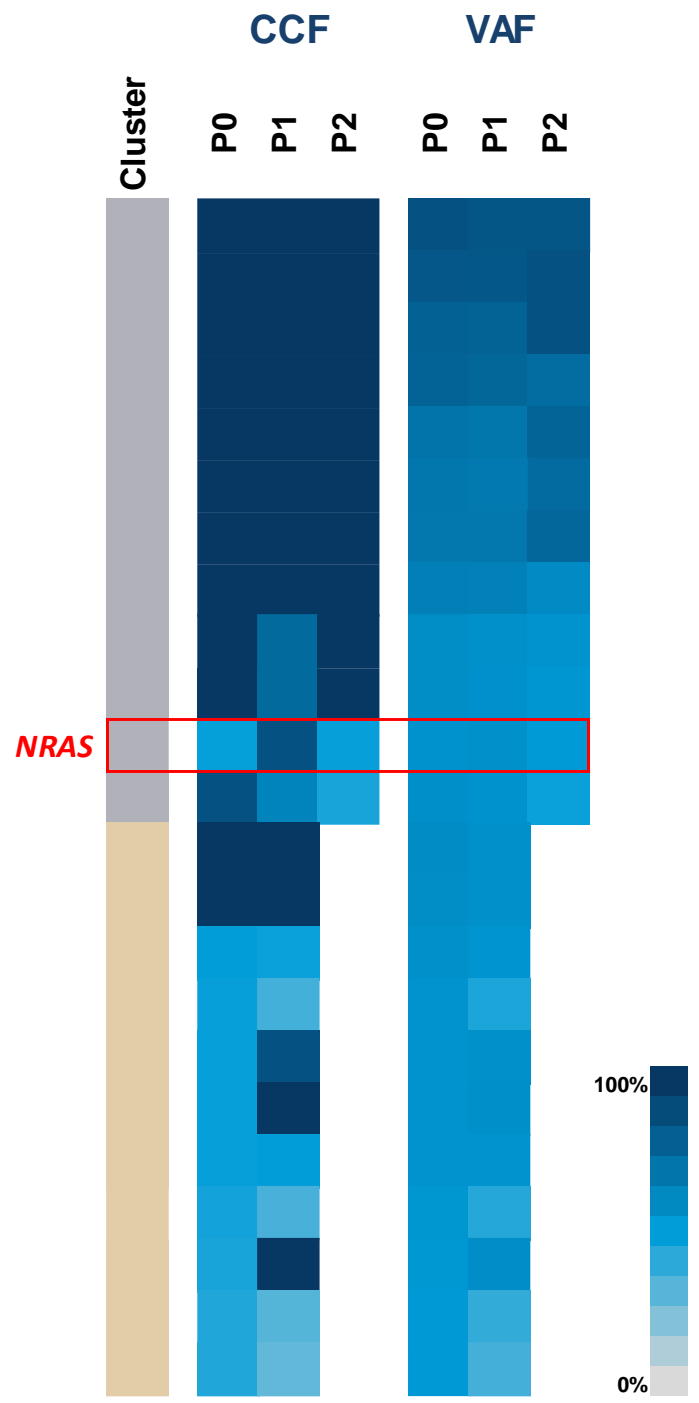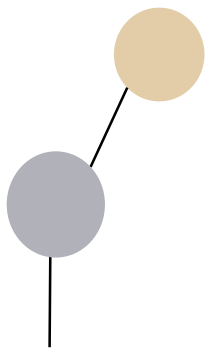

P0

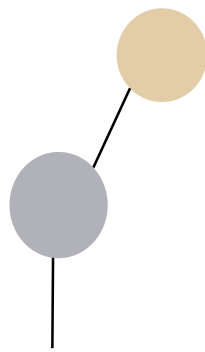

P1

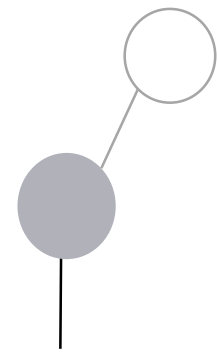

P2

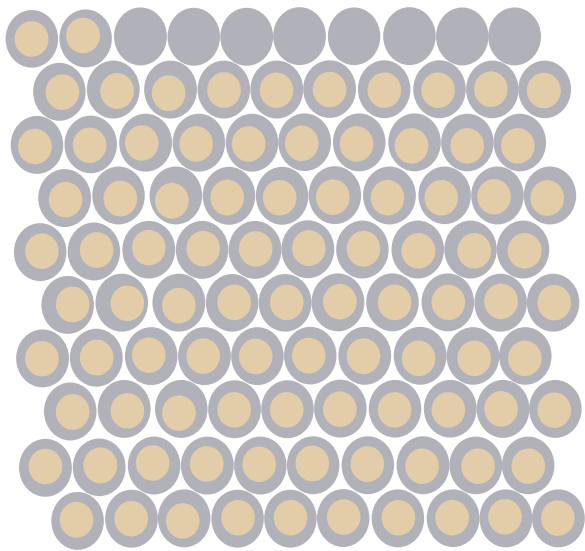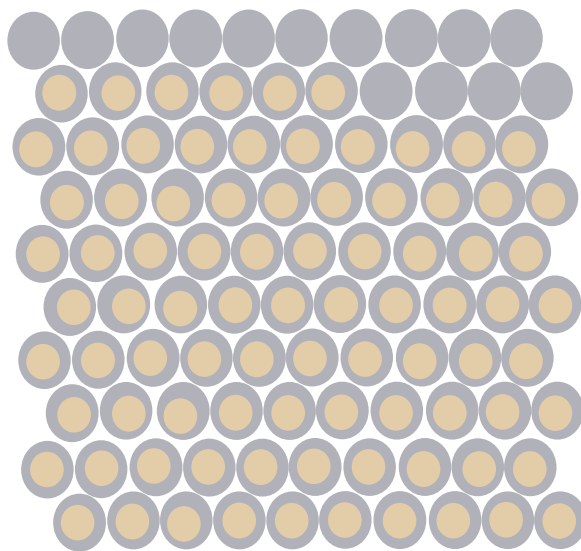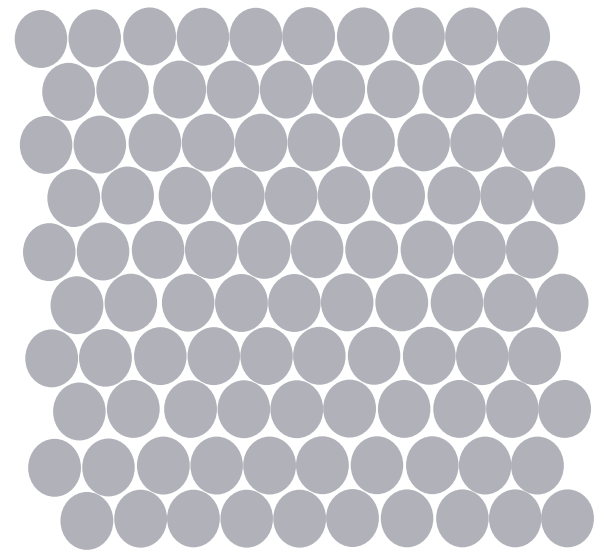

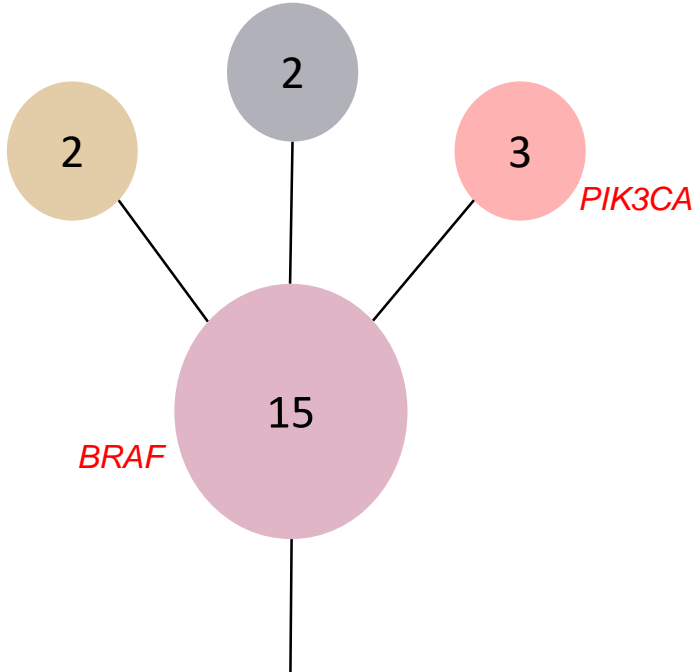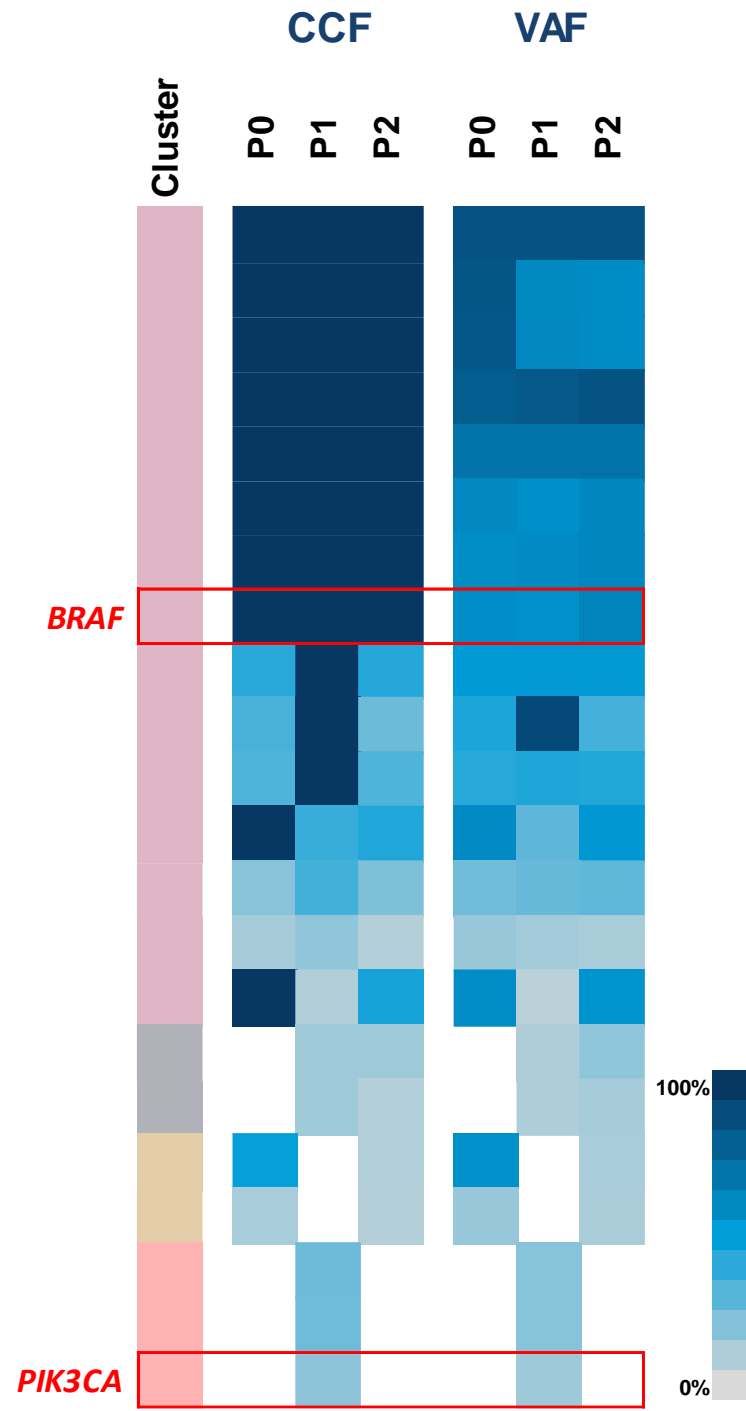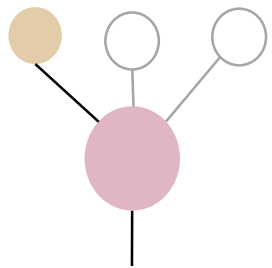

P0

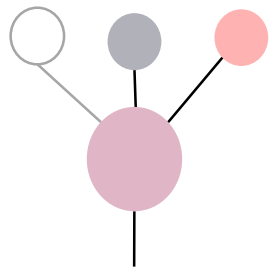

P1

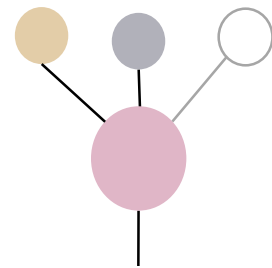

P2

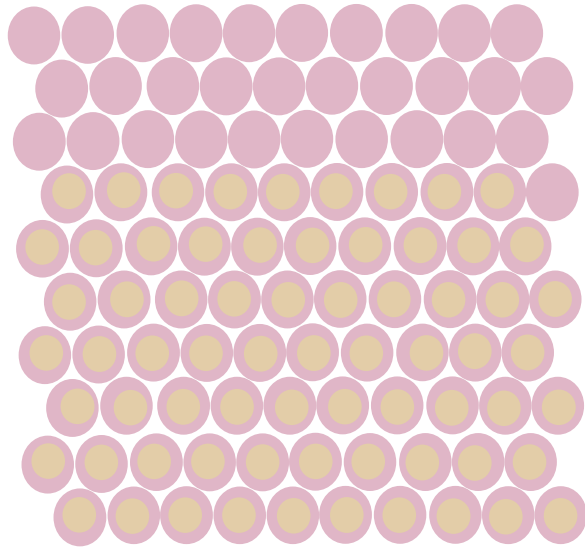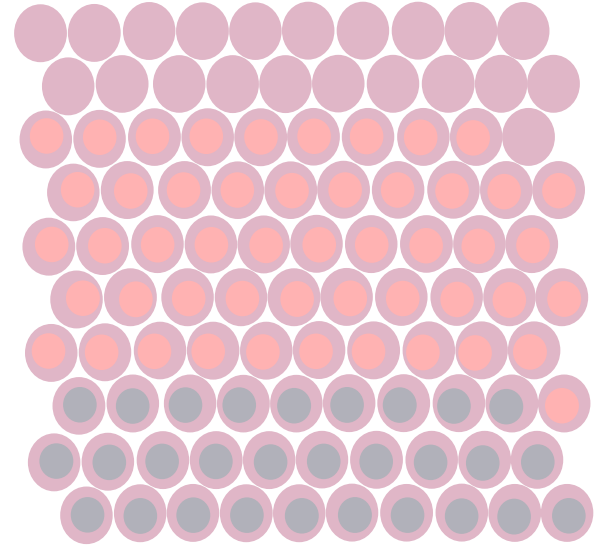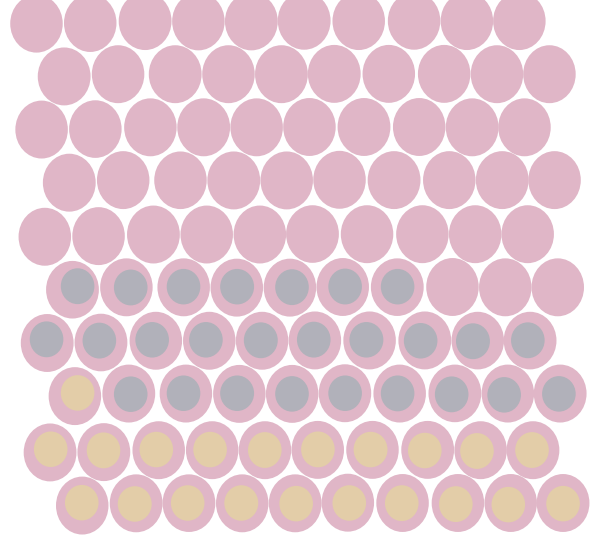

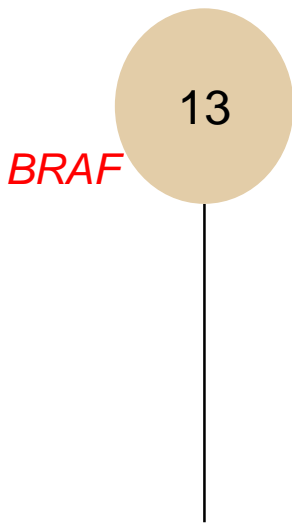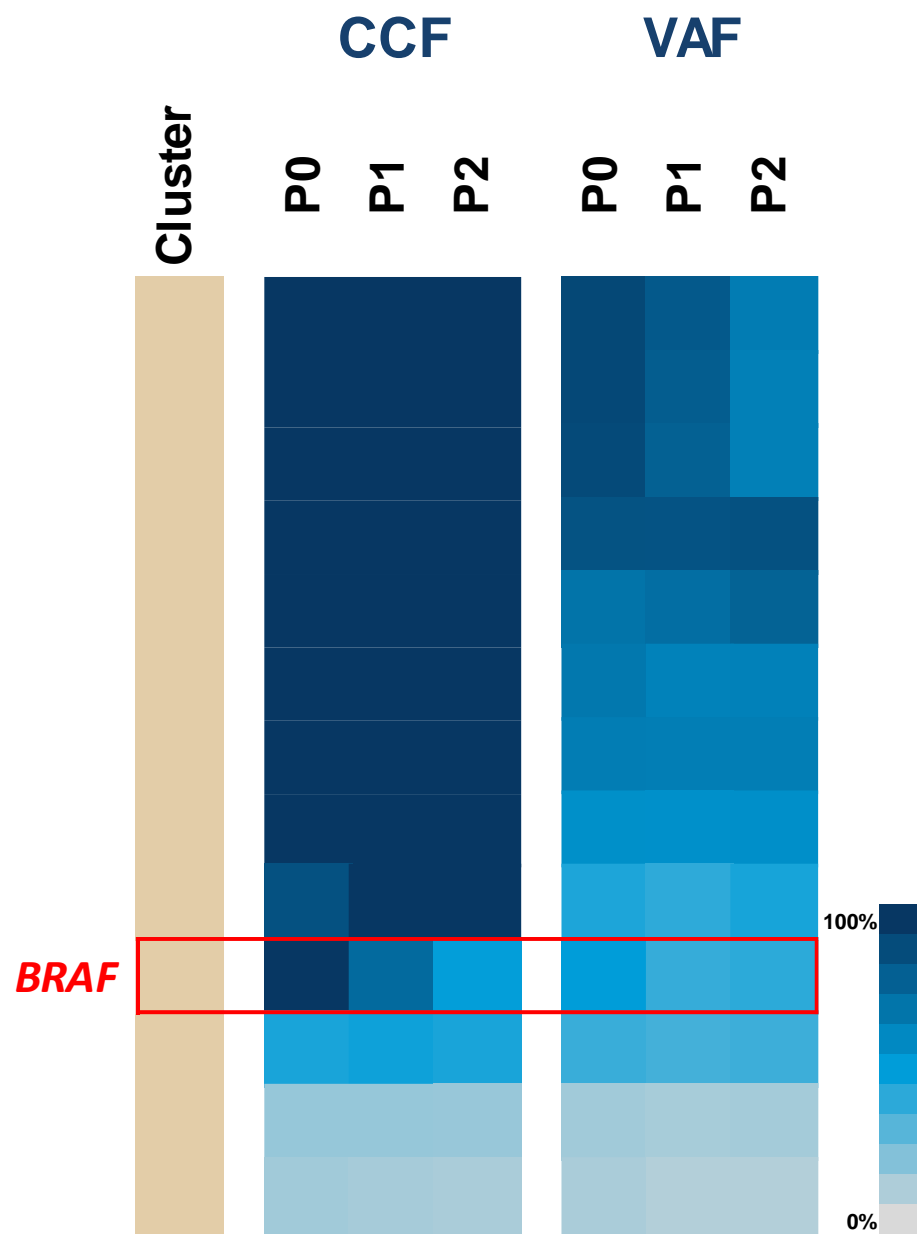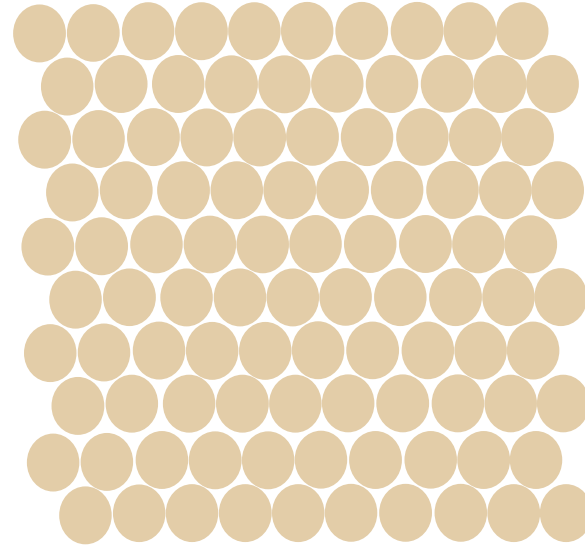

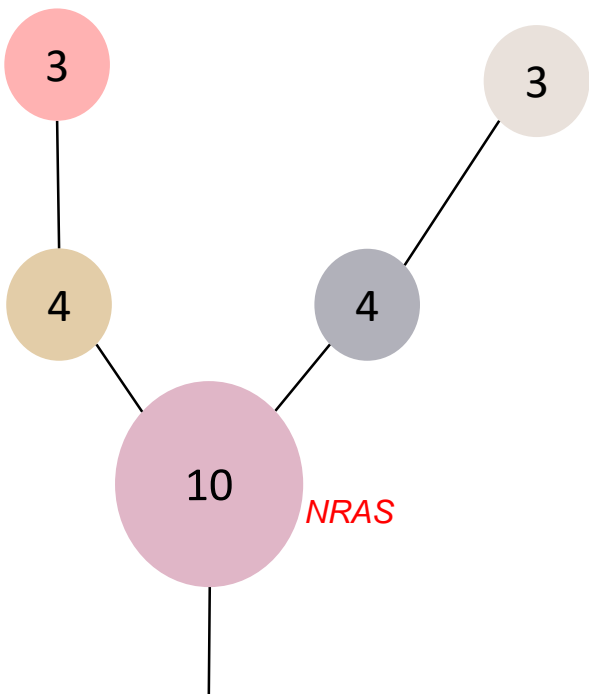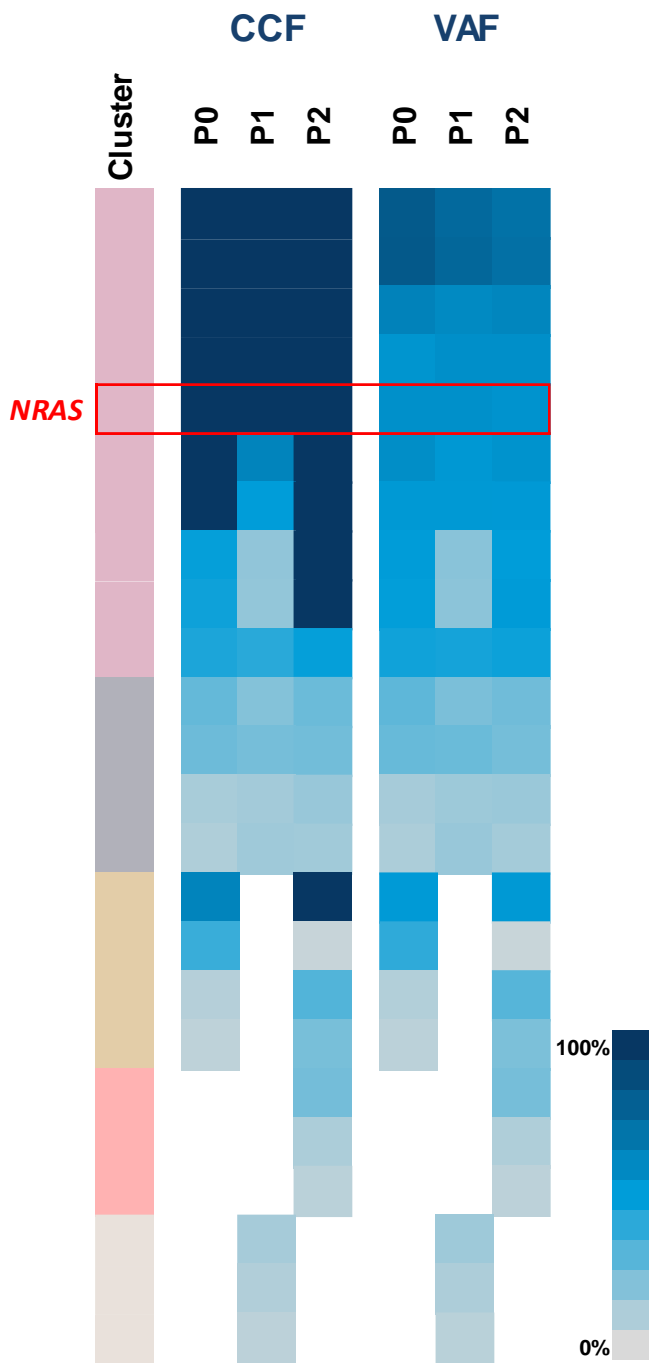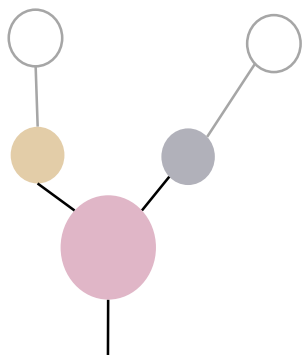

P0

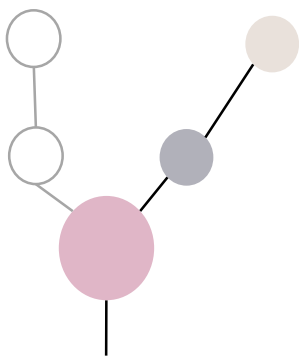

P1

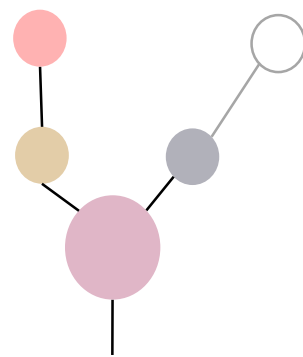

P2

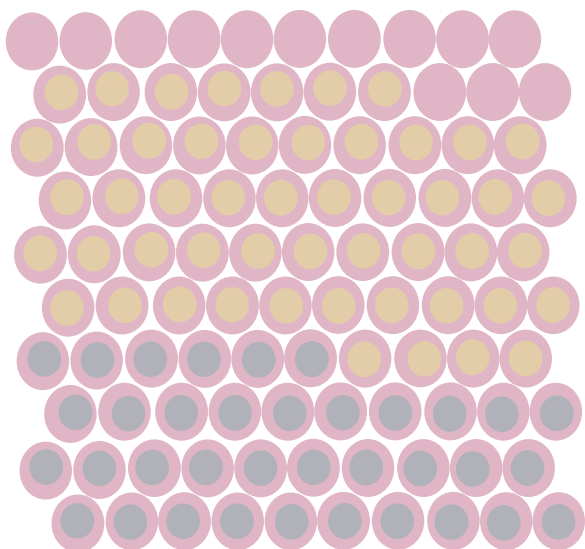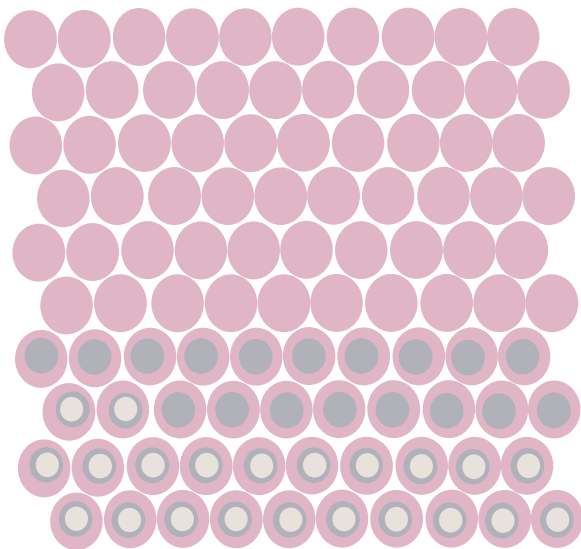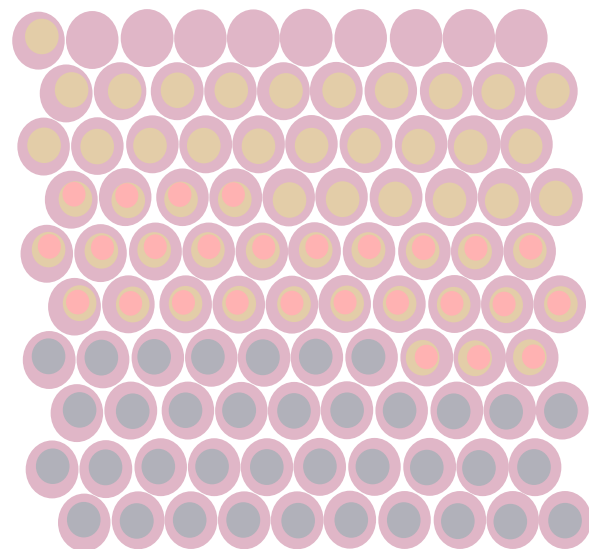

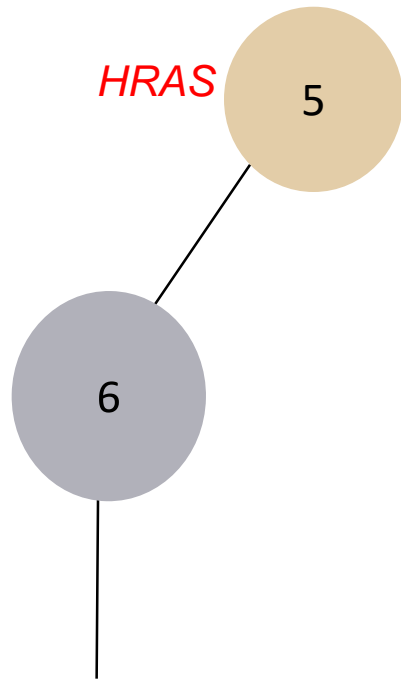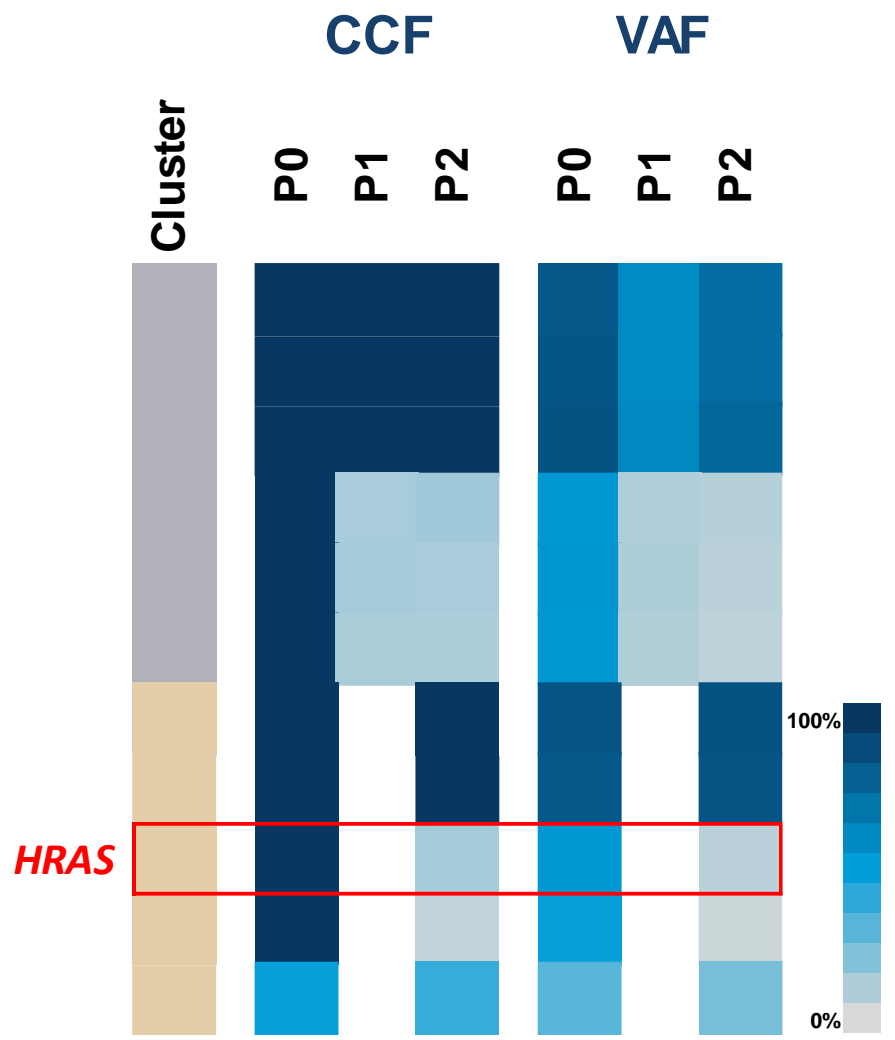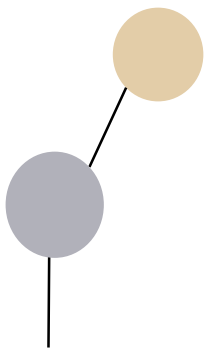

P0

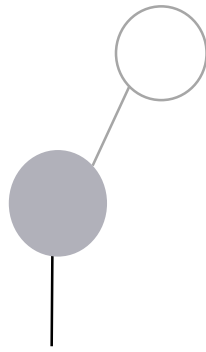

P1

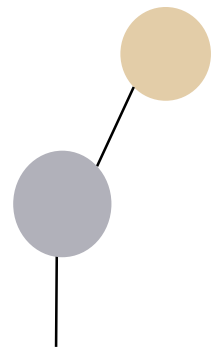

P2

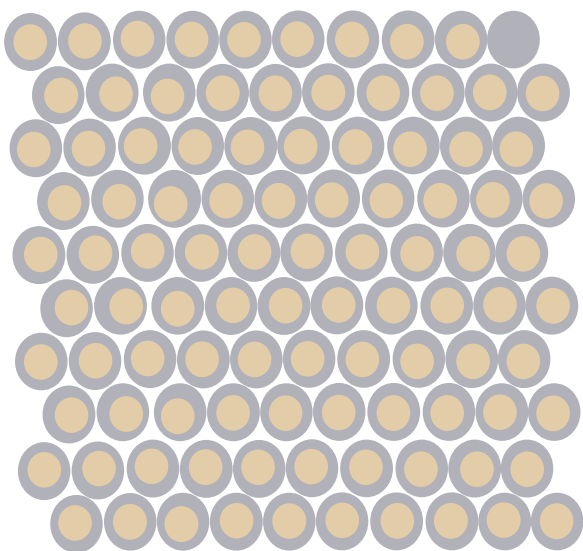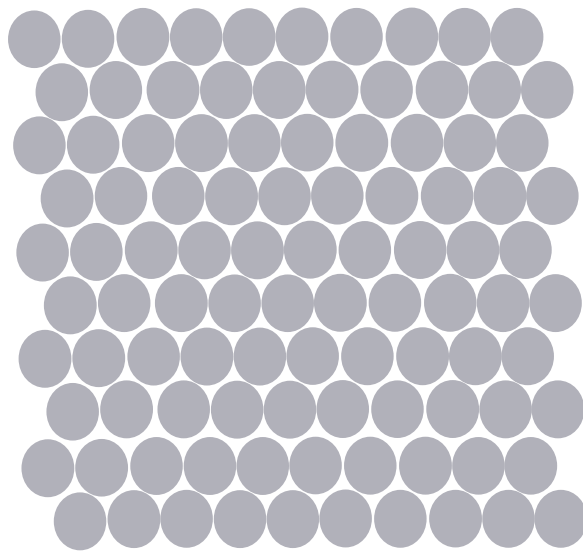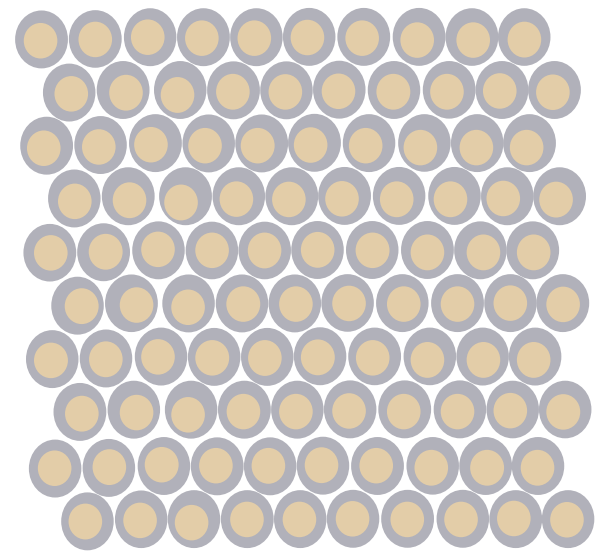

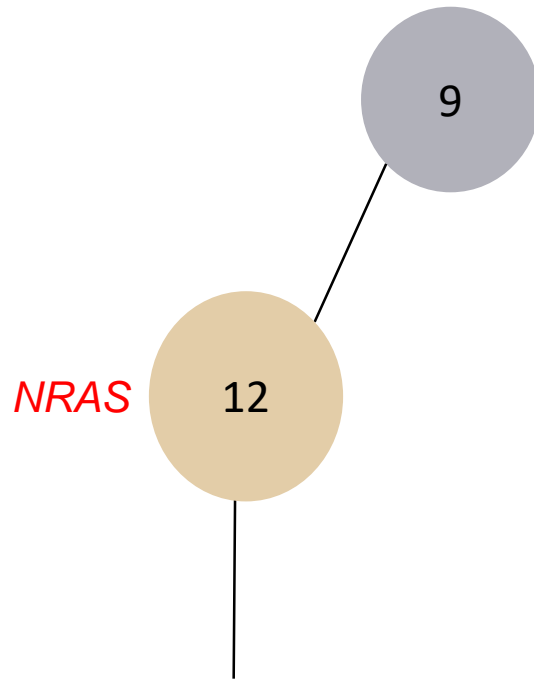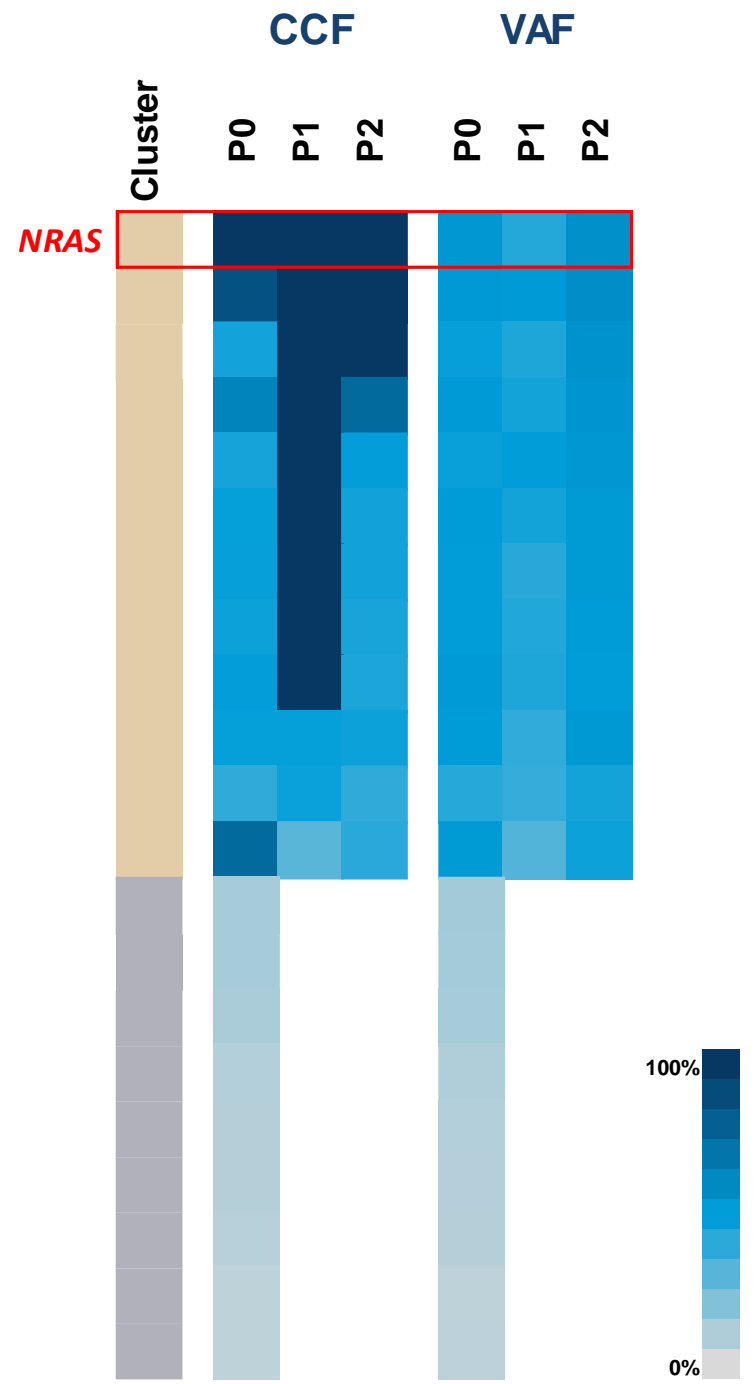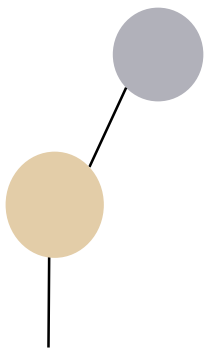

P0

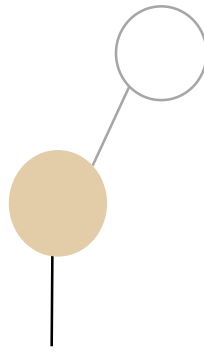

P1

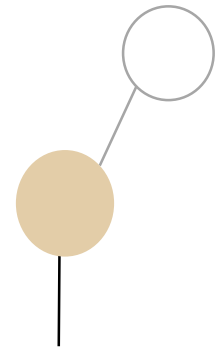

P2

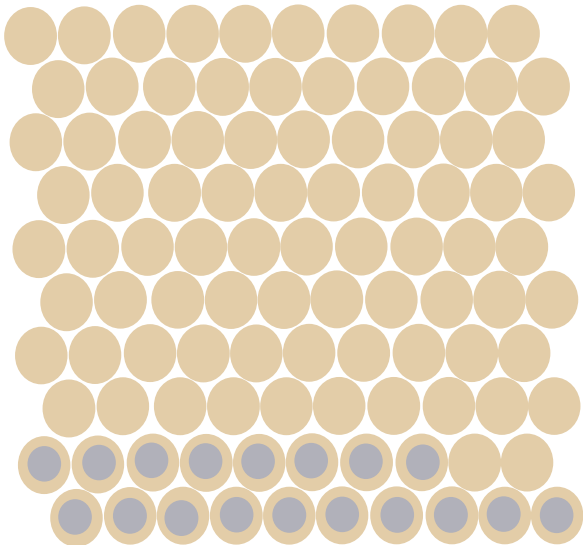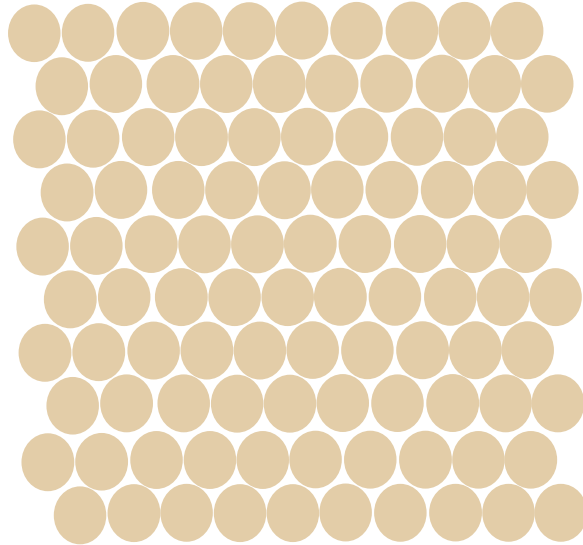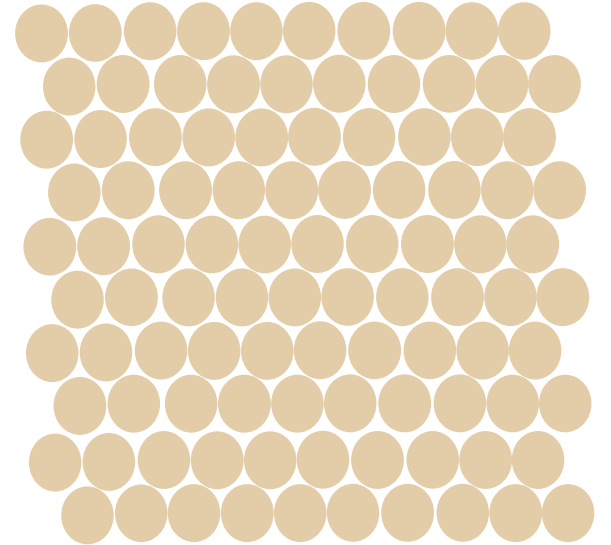

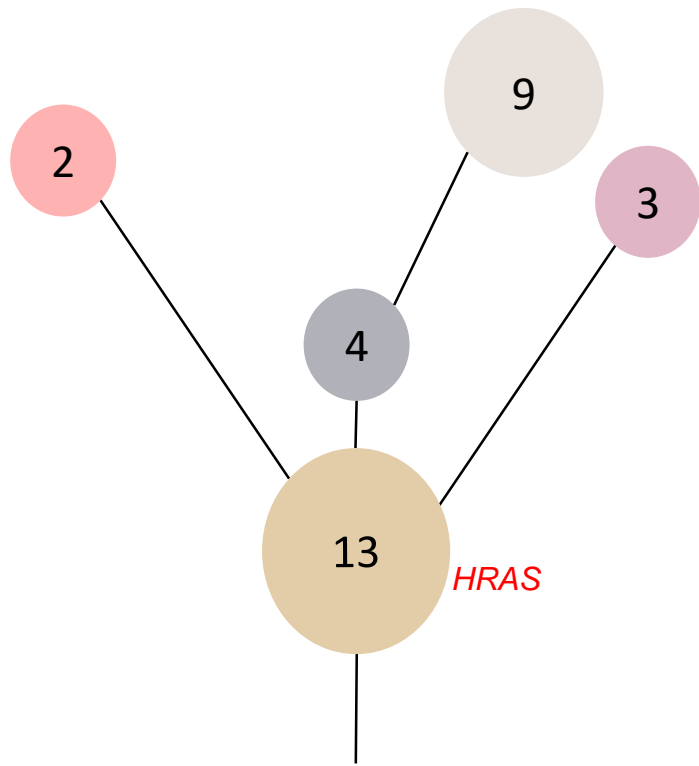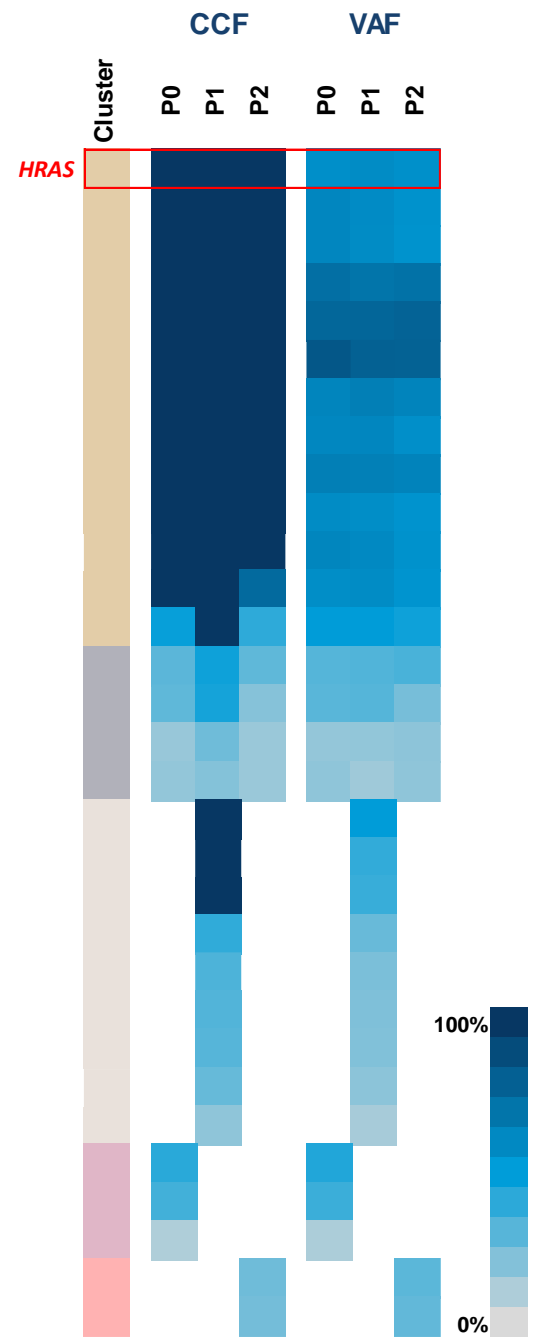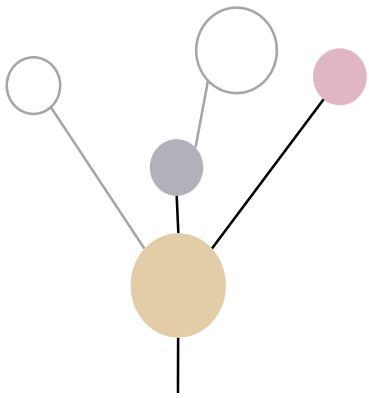

P0

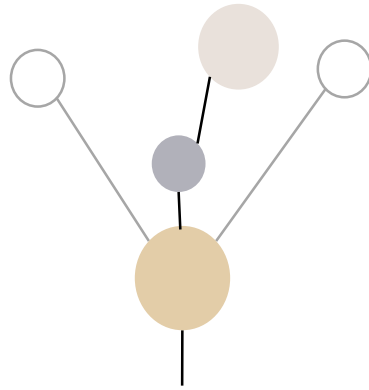

P1

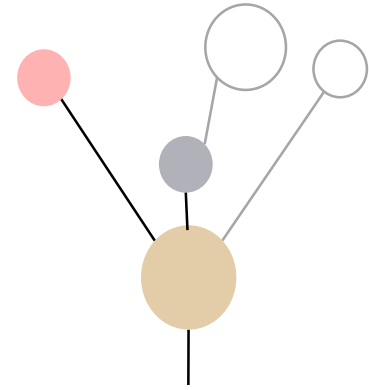

P2

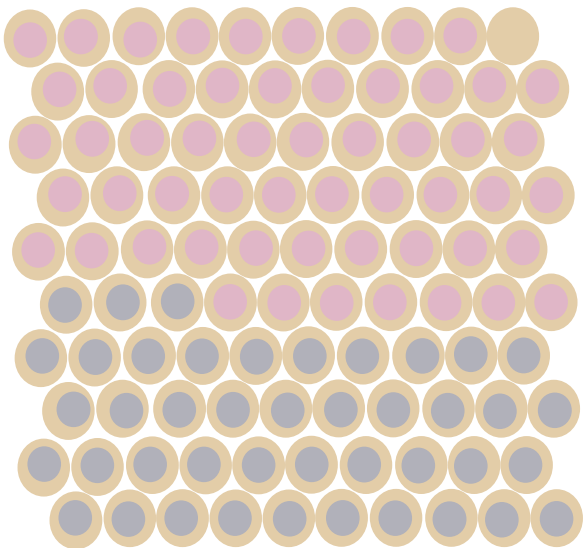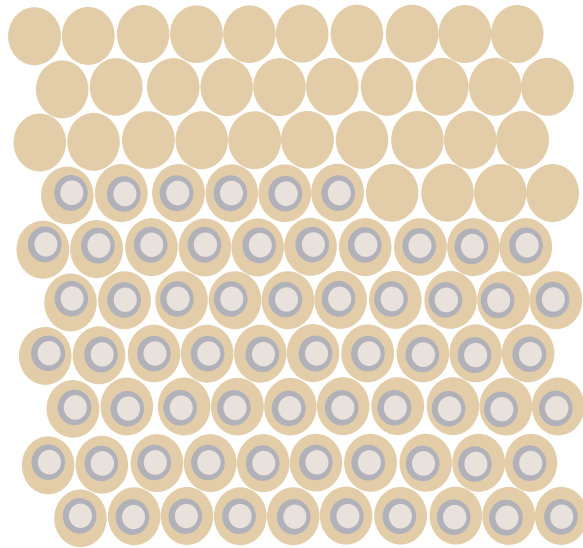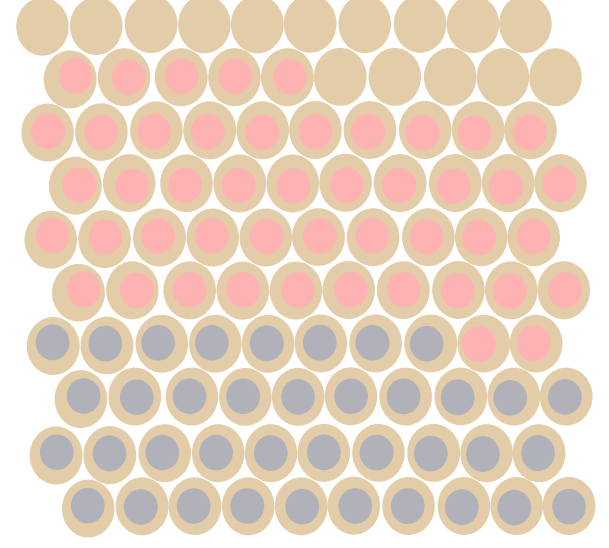

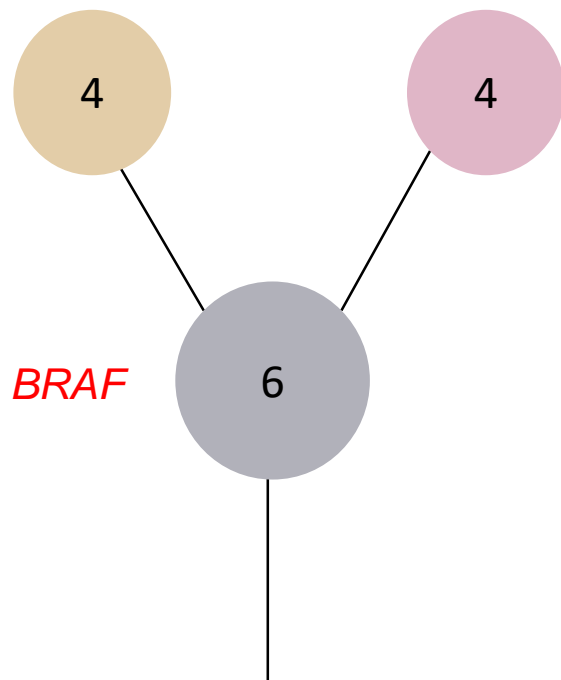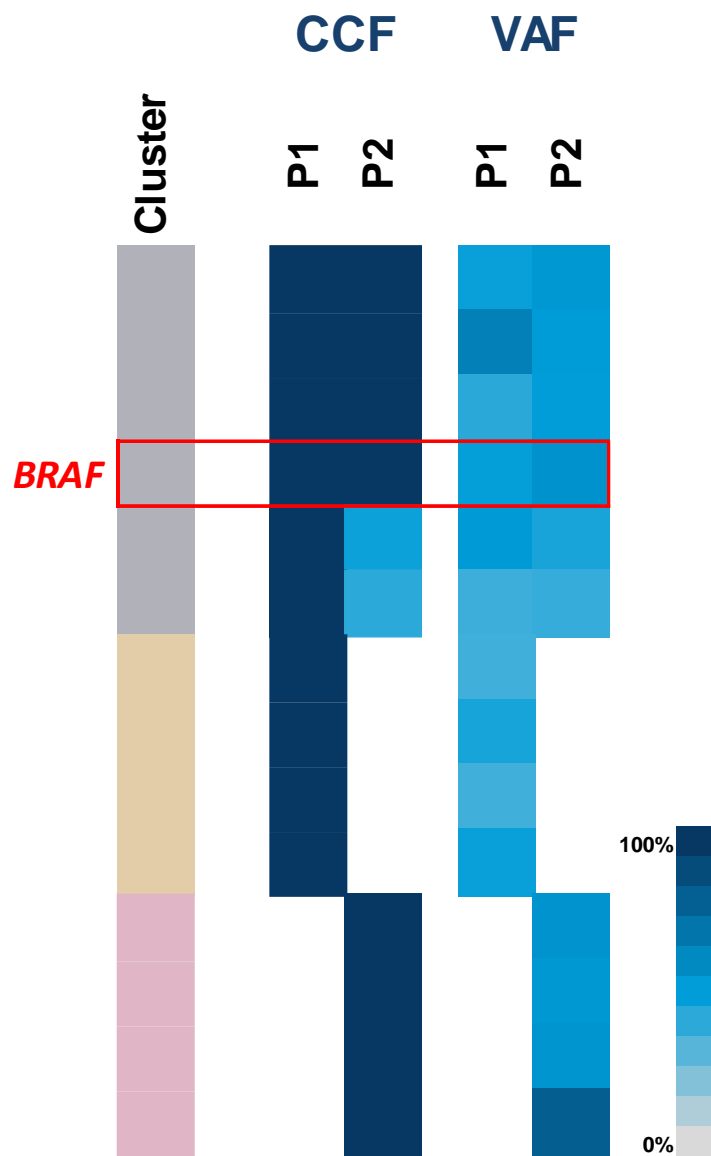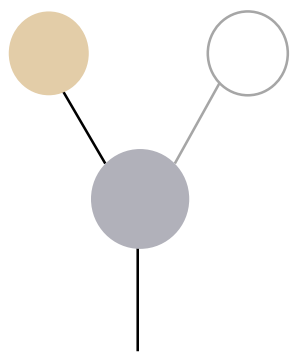

P1

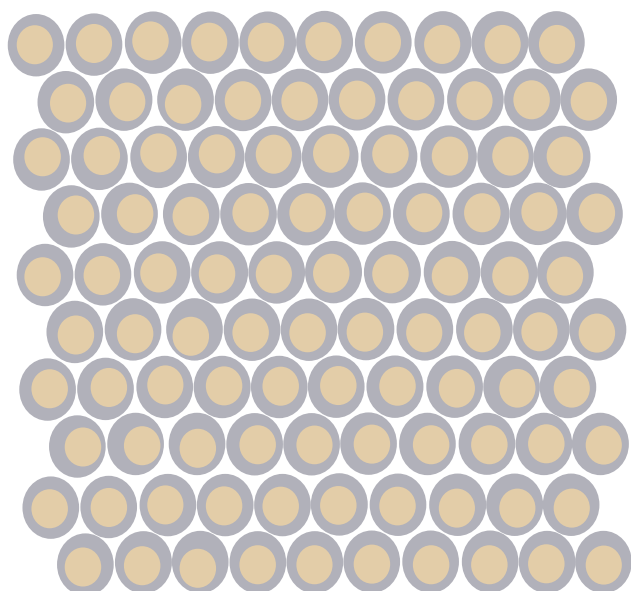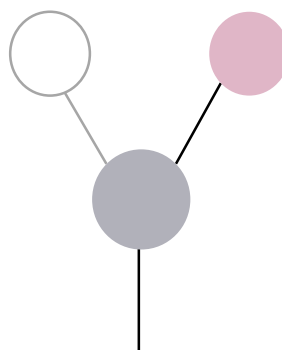

P2

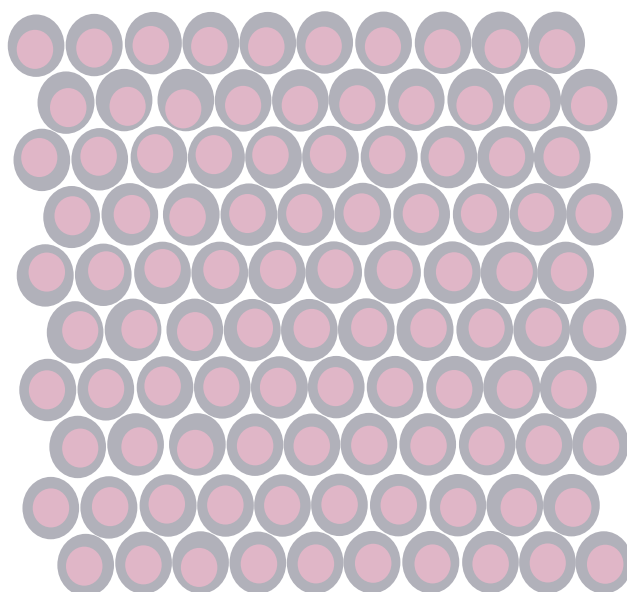



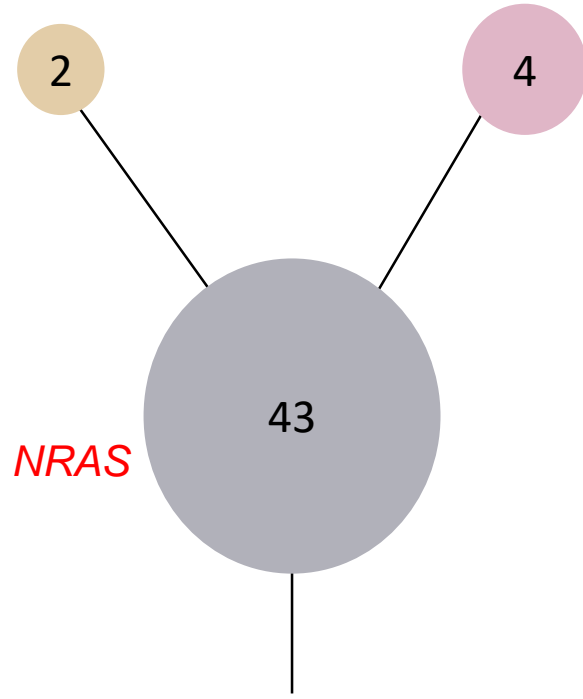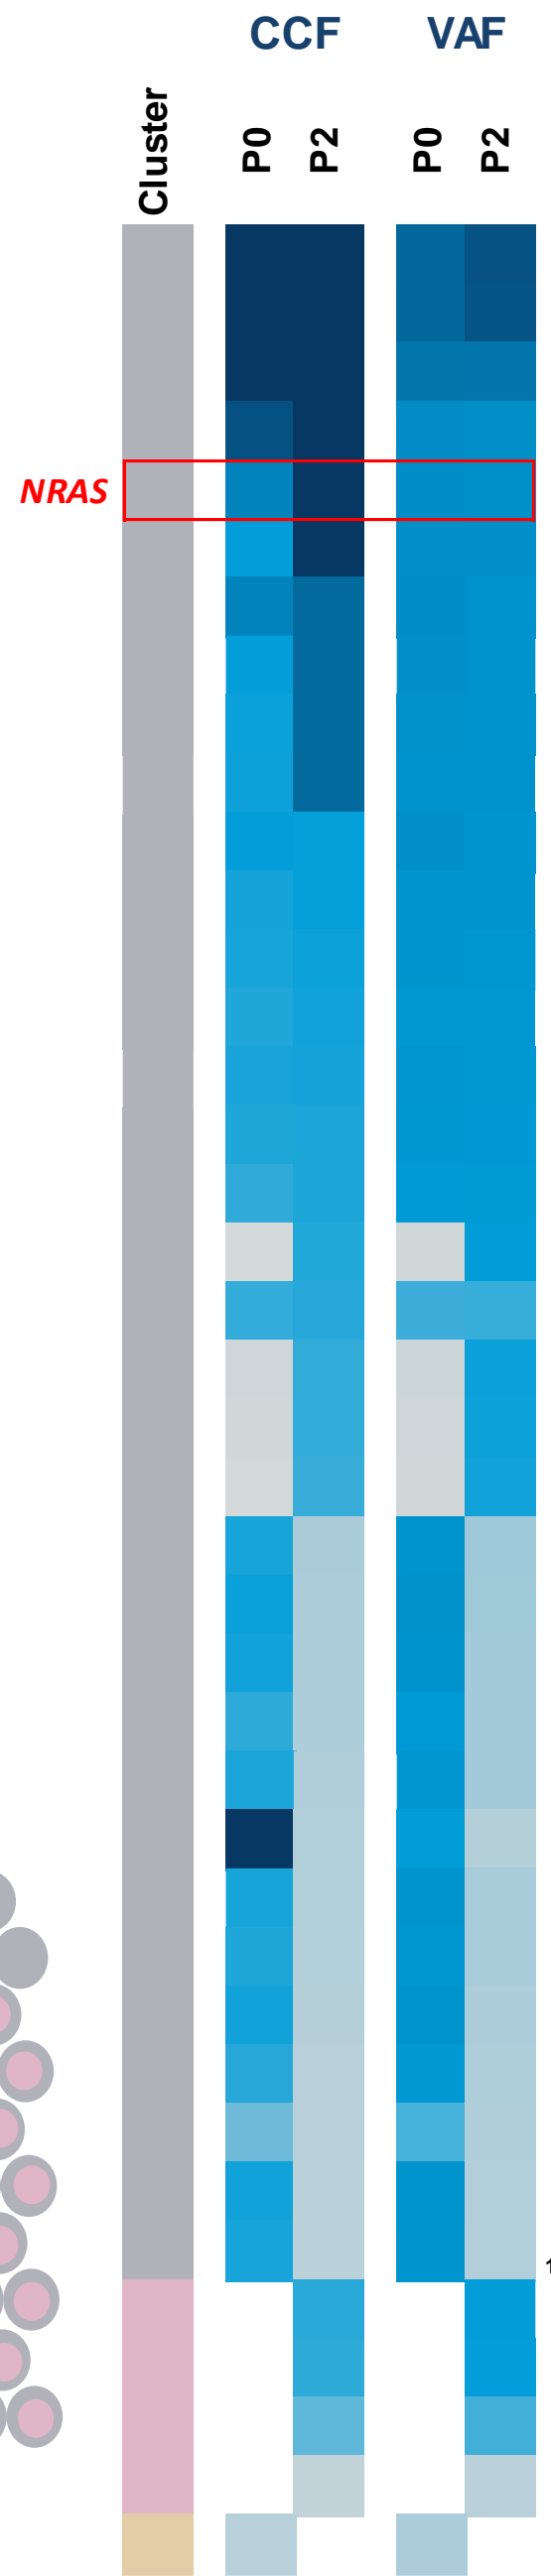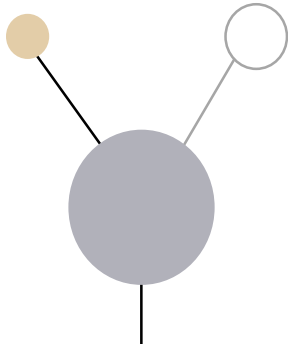

P0

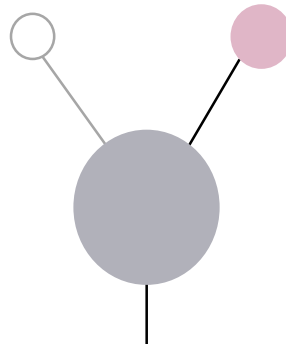

P2

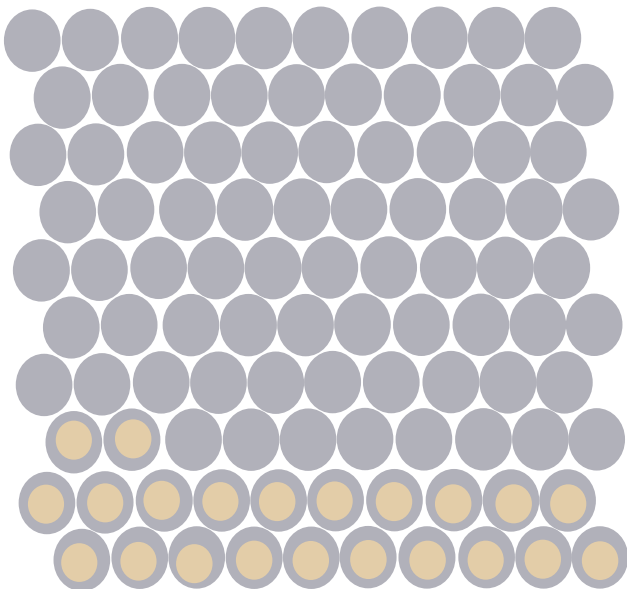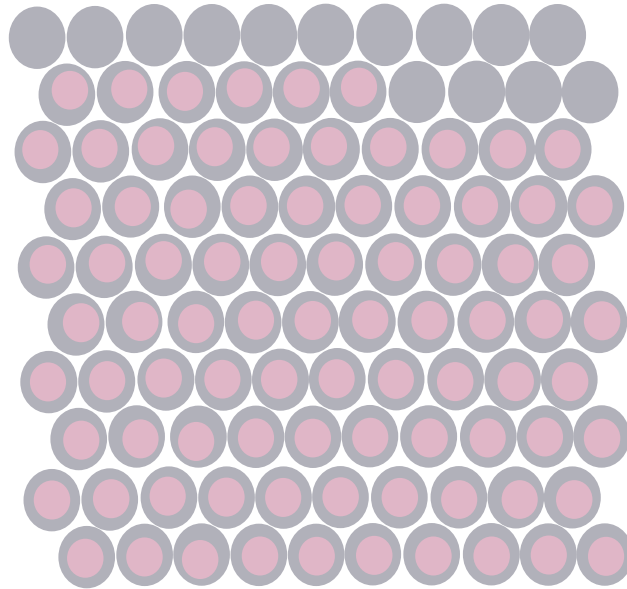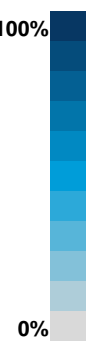

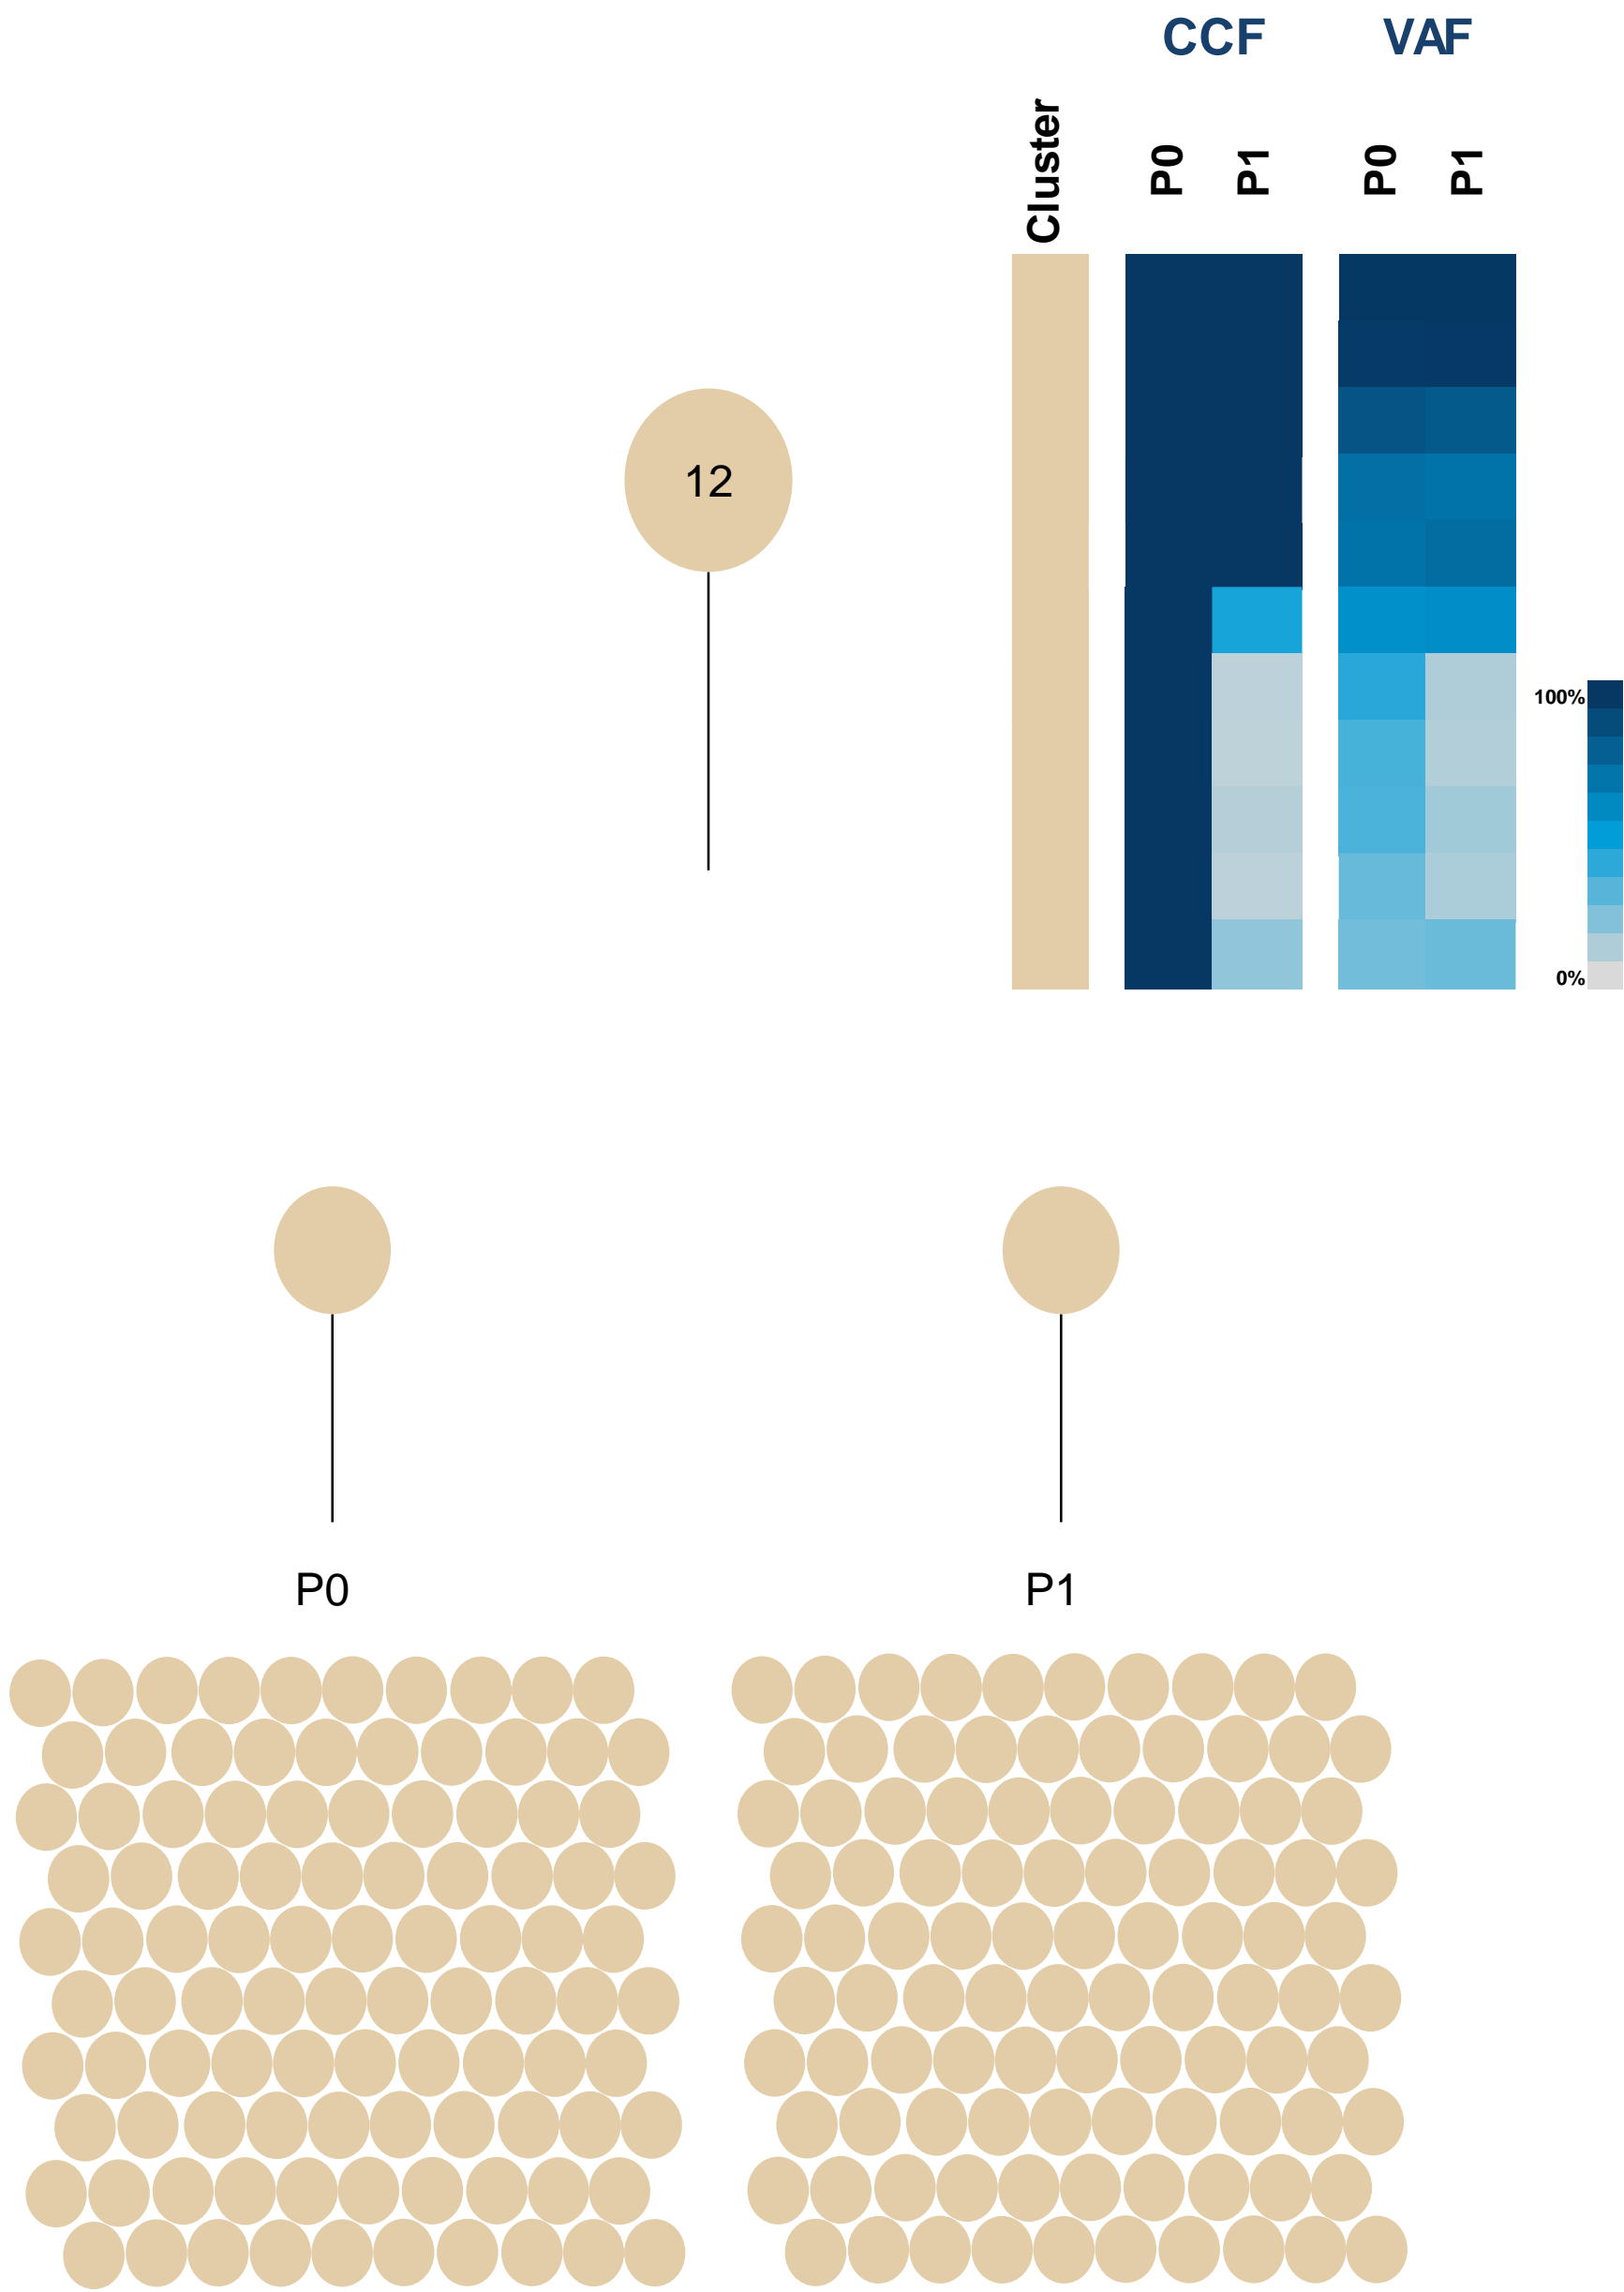

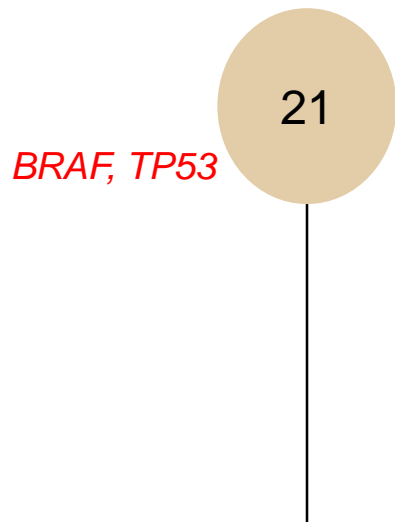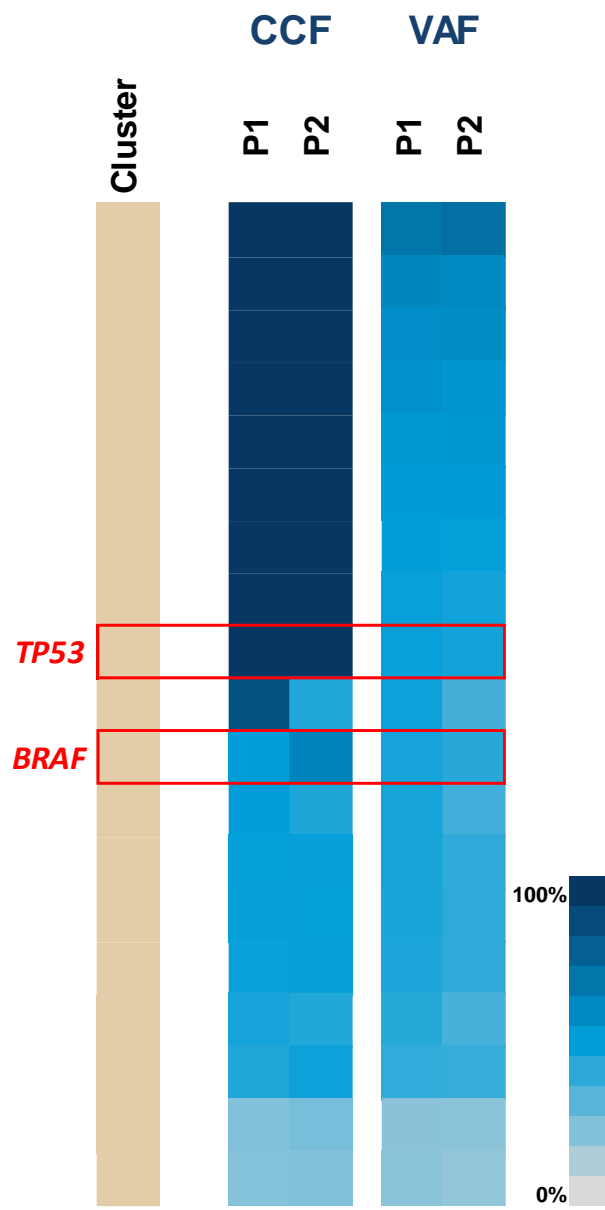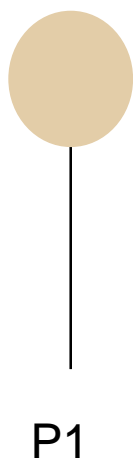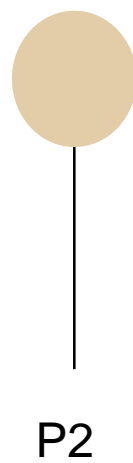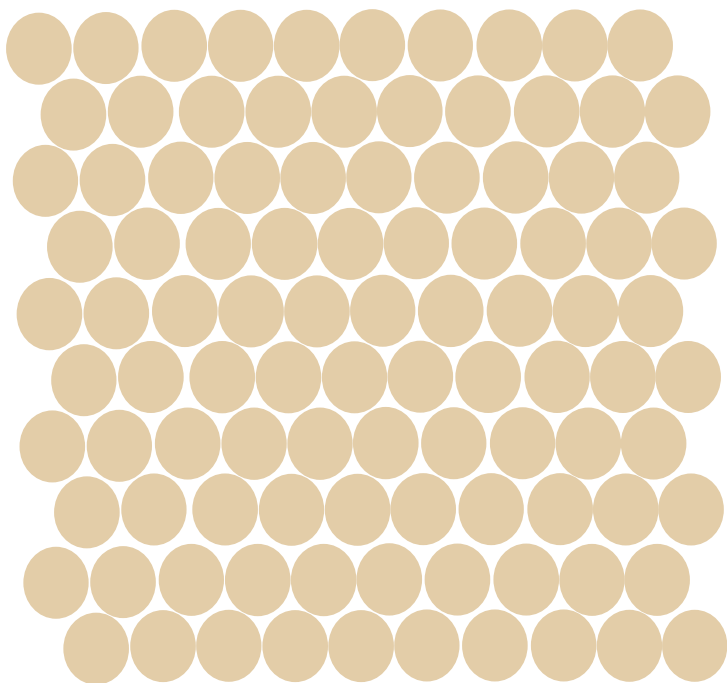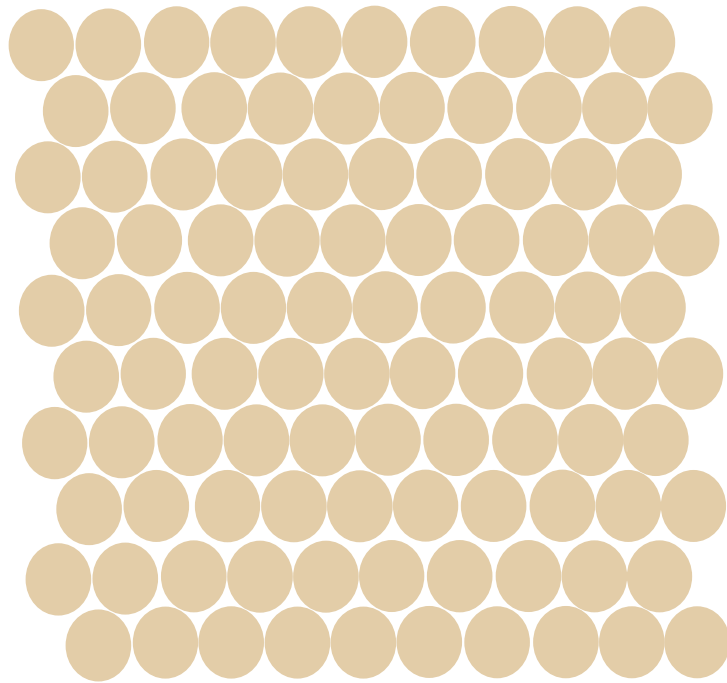

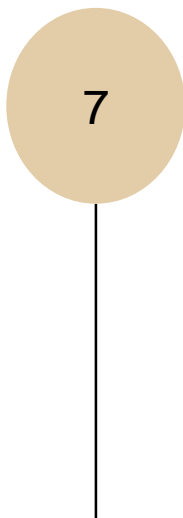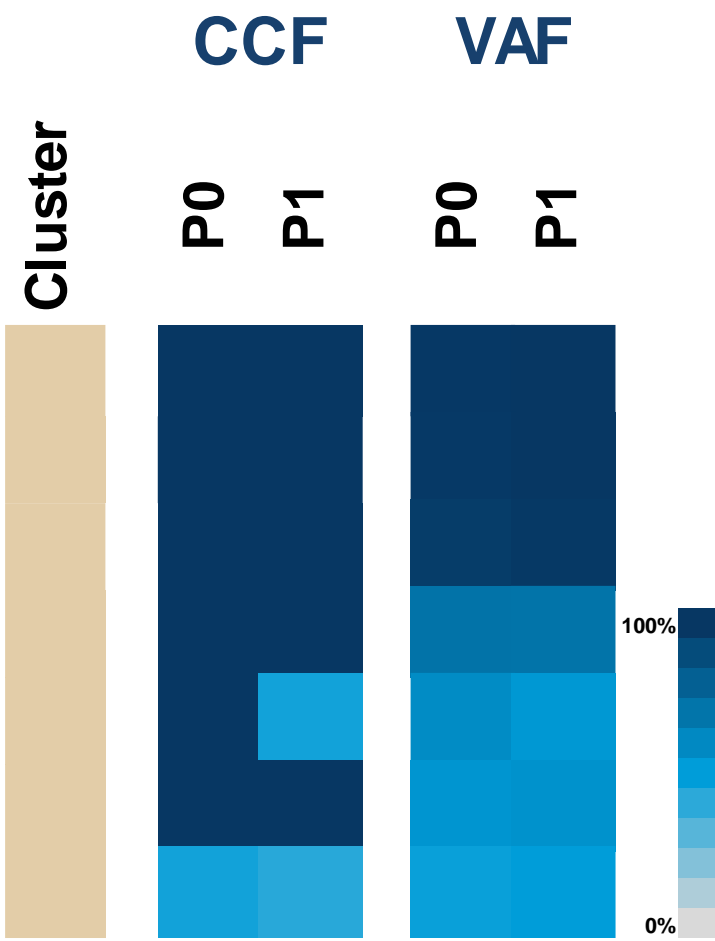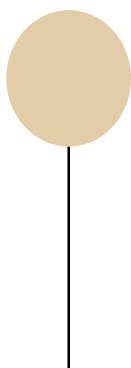

P0

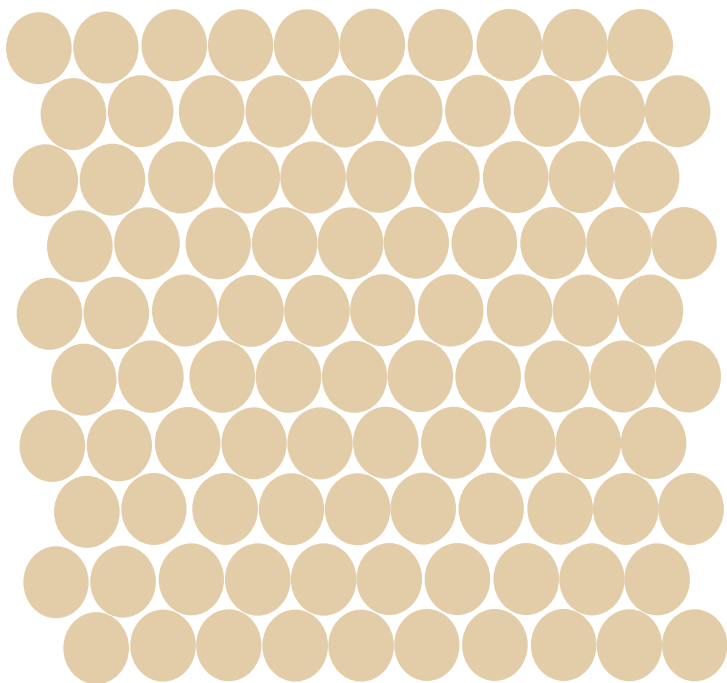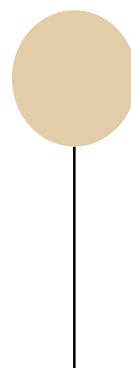

P1

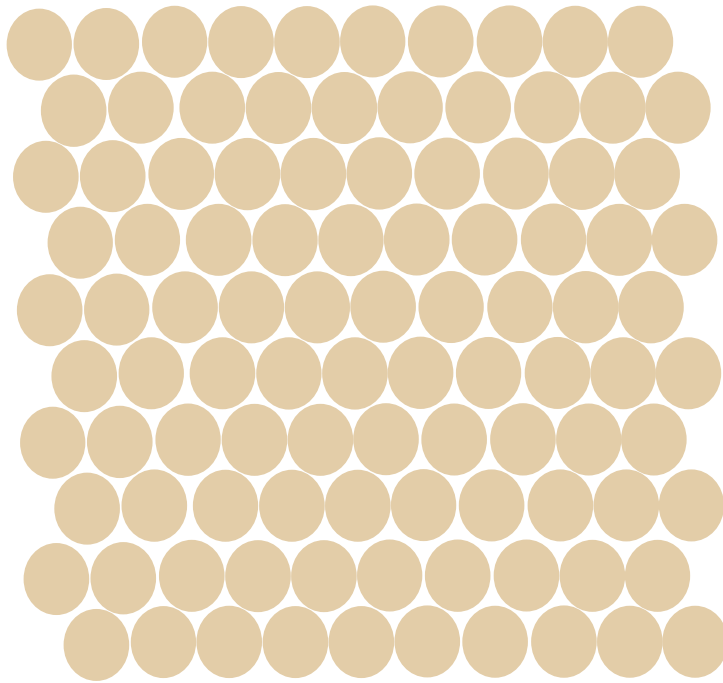

**Figure S3: Phylogenetic trees.** Phylogenetic trees for 77 PTC tumors. For each sample only the optimal trees derived using LICHeE (Lineage Inference for Cancer Heterogeneity and Evolution) have been presented. The right-side panel shows a colored bar representing all mutation clusters, with corresponding cancer cell fractions (CCF) and variant allele frequency (VAF) values as a heatmap, where darker colors indicate higher values. Driver genes are highlighted in red. The middle top pane shows the complete phylogenetic tree as constructed based on mutation clusters, and where relevant, primary and relapse phylogenetic trees have been shown separately in a black box. Different colored nodes represent distinct clones, with the number of mutations contributing to the cluster displayed inside each node. Below are the phylogenetic trees shown for each region, where clusters not found in a given region have been represented as grey empty nodes. “P”, represents regions from primary tumors; “R”, represents the tissues from . Beneath each regional phylogenetic tree, a grid of a 100 representative cells shows the mutational clusters present via coinciding cluster colors. In relevant samples, the left-side panel shows copy number aberrations (“Amp”, amplification) of cancer driver genes and corresponding cluster. Relapse cases (A) are denoted in green, whereas (B) Non-relapse cases are denoted in black.

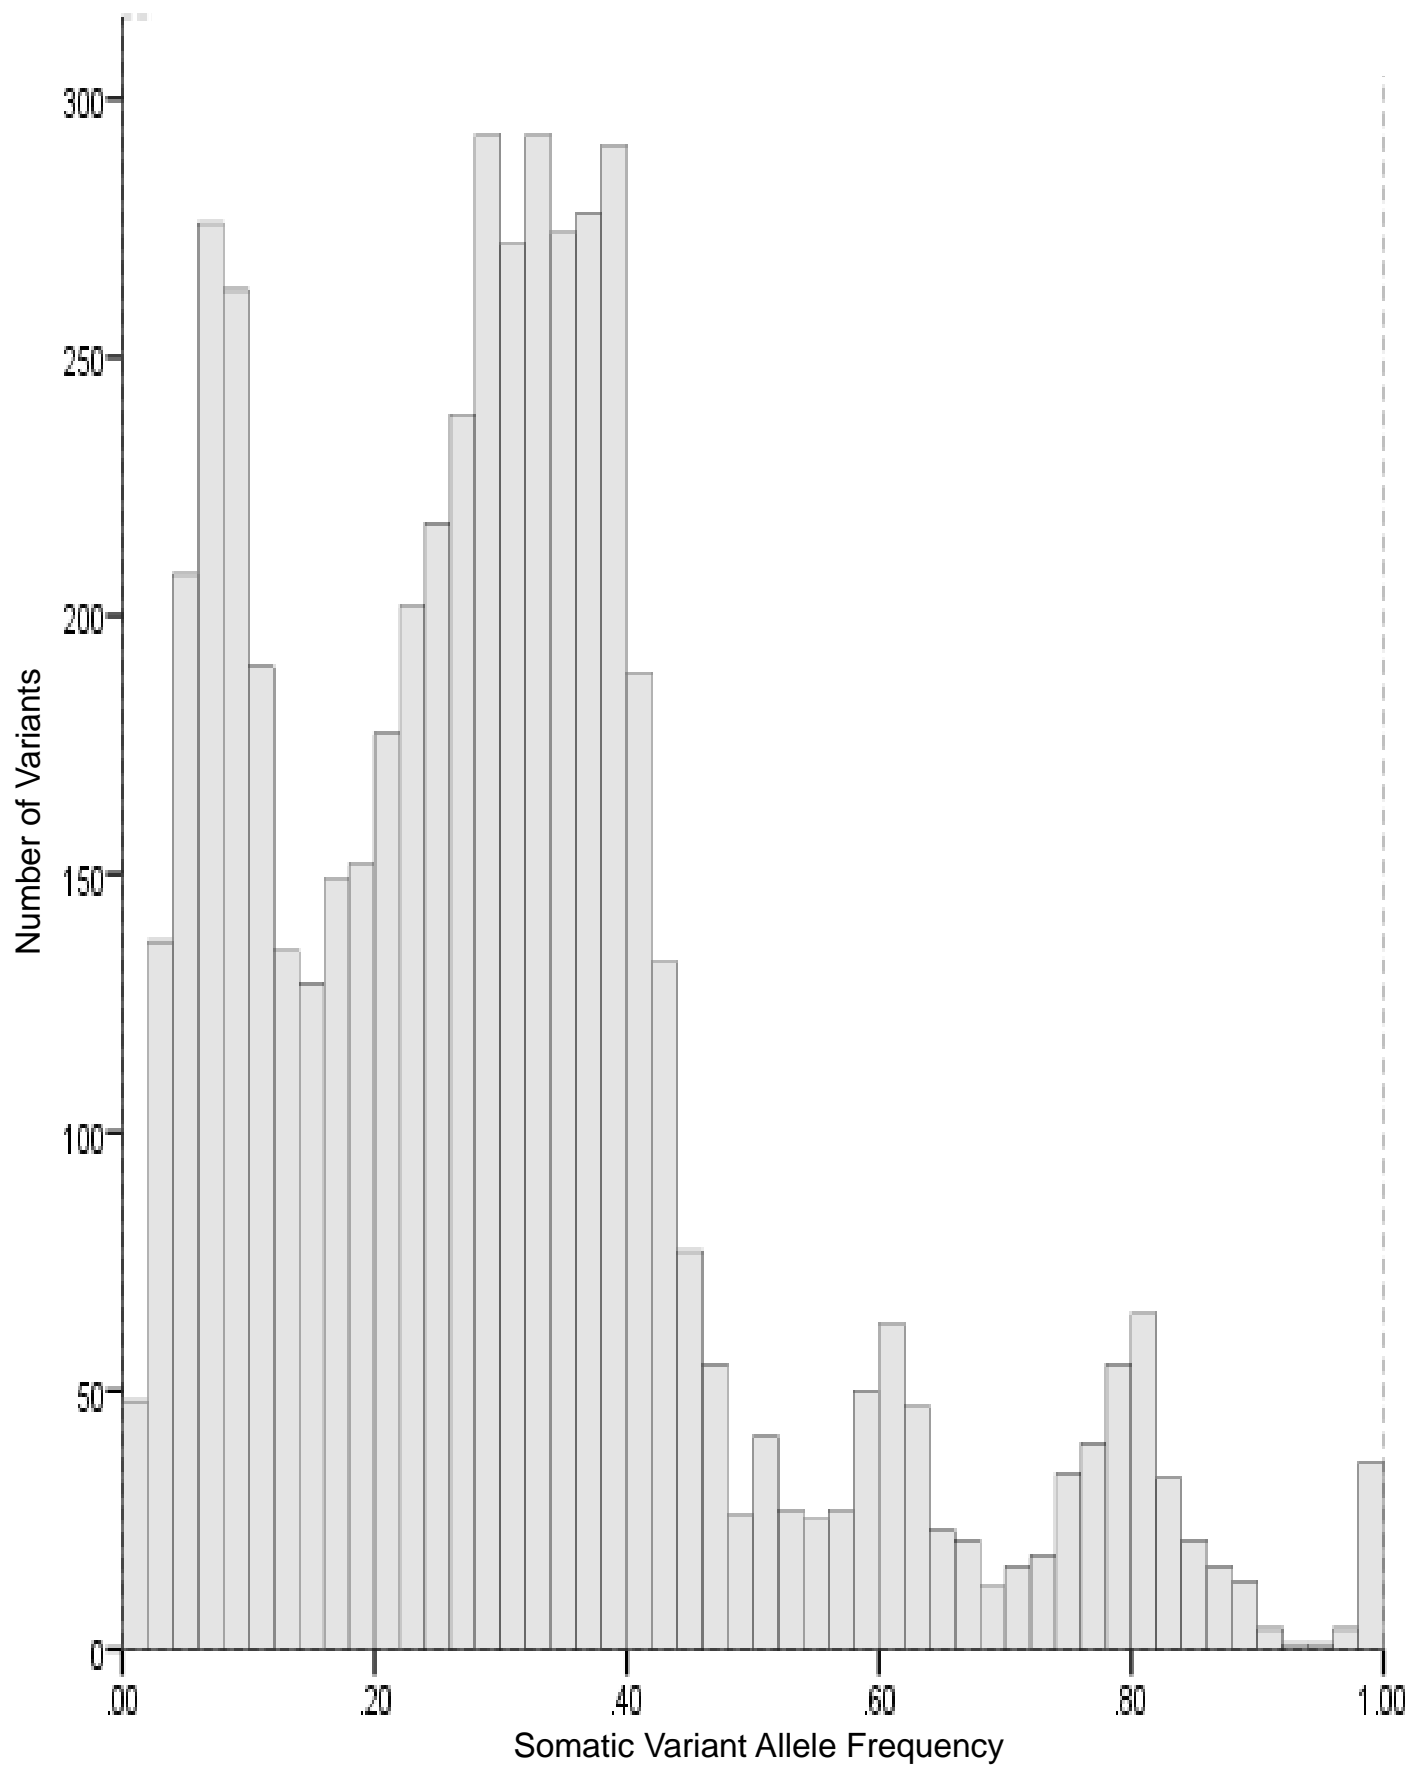

**Figure S4: Variant allele frequency (VAF) with the number of somatic mutations.**

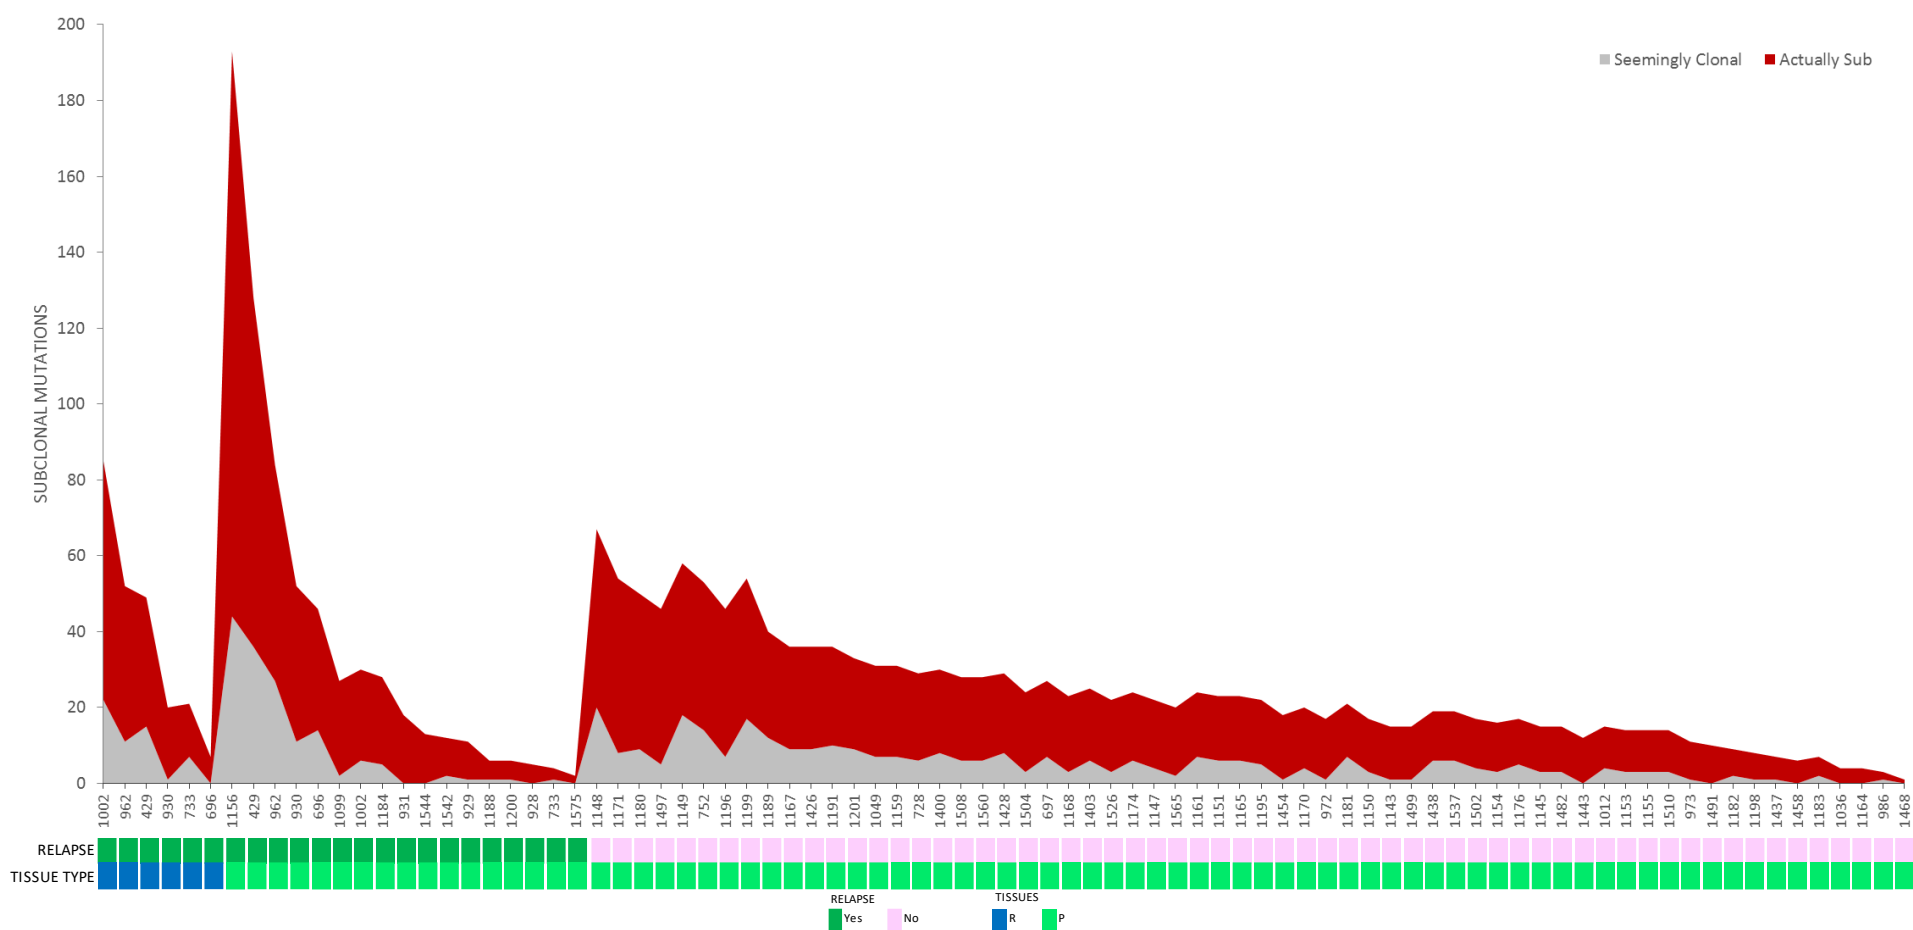

**Figure S5: Illusion of Clonality.** Barplot depicts all subclonal mutations, and whether these exhibit an illusion of clonality; whereby if the mutation was mostly clonal, but appeared subclonal in at least one tissue, overall the mutation would be considered subclonal

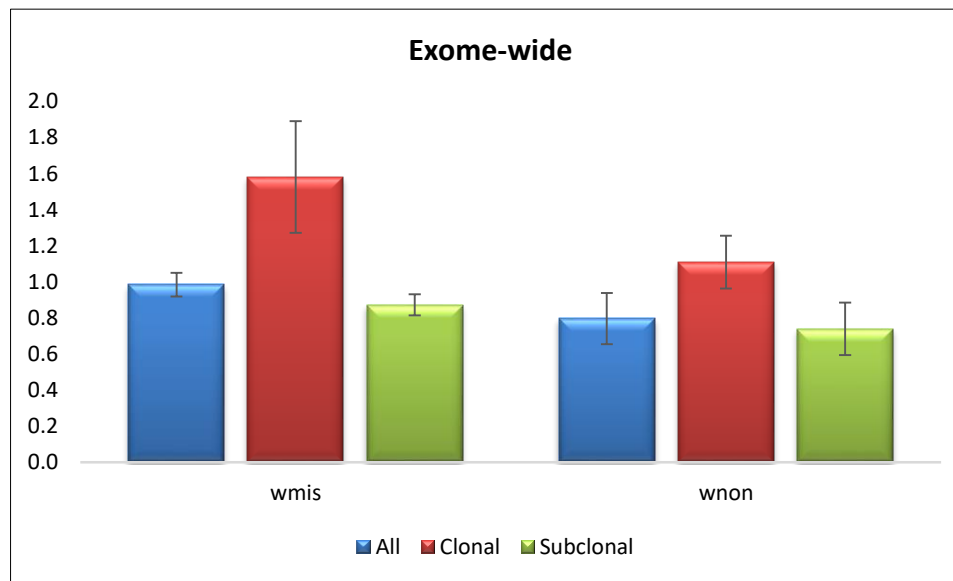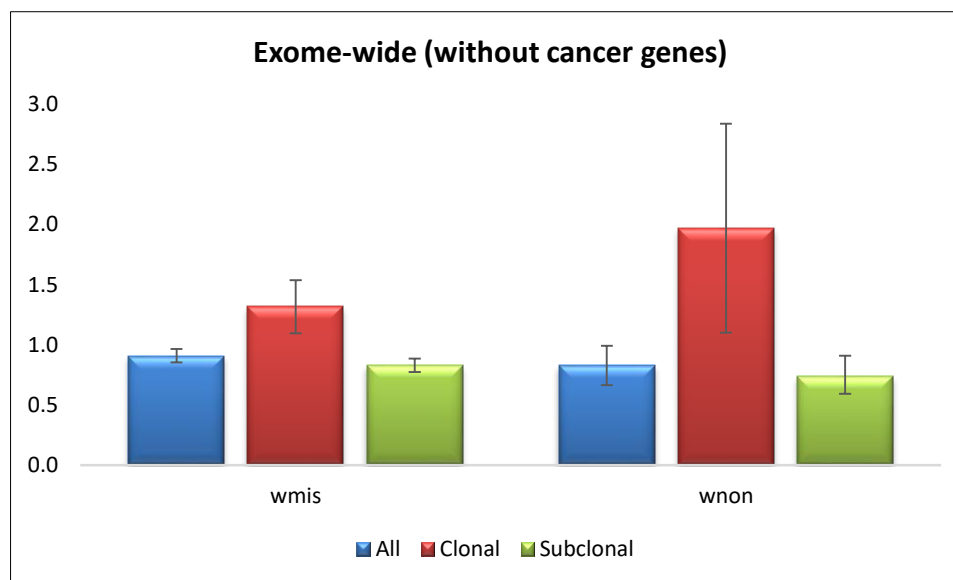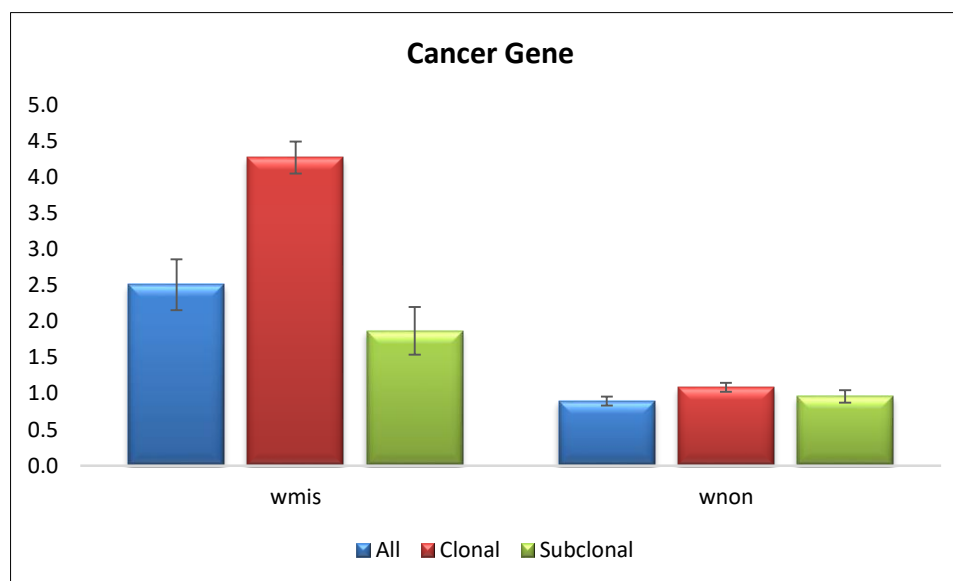

**Figure S6:** Plot showing dN/dS ratio. dN/dS ratio calculated as exome wide, exome wide without cancer genes and for cancer genes



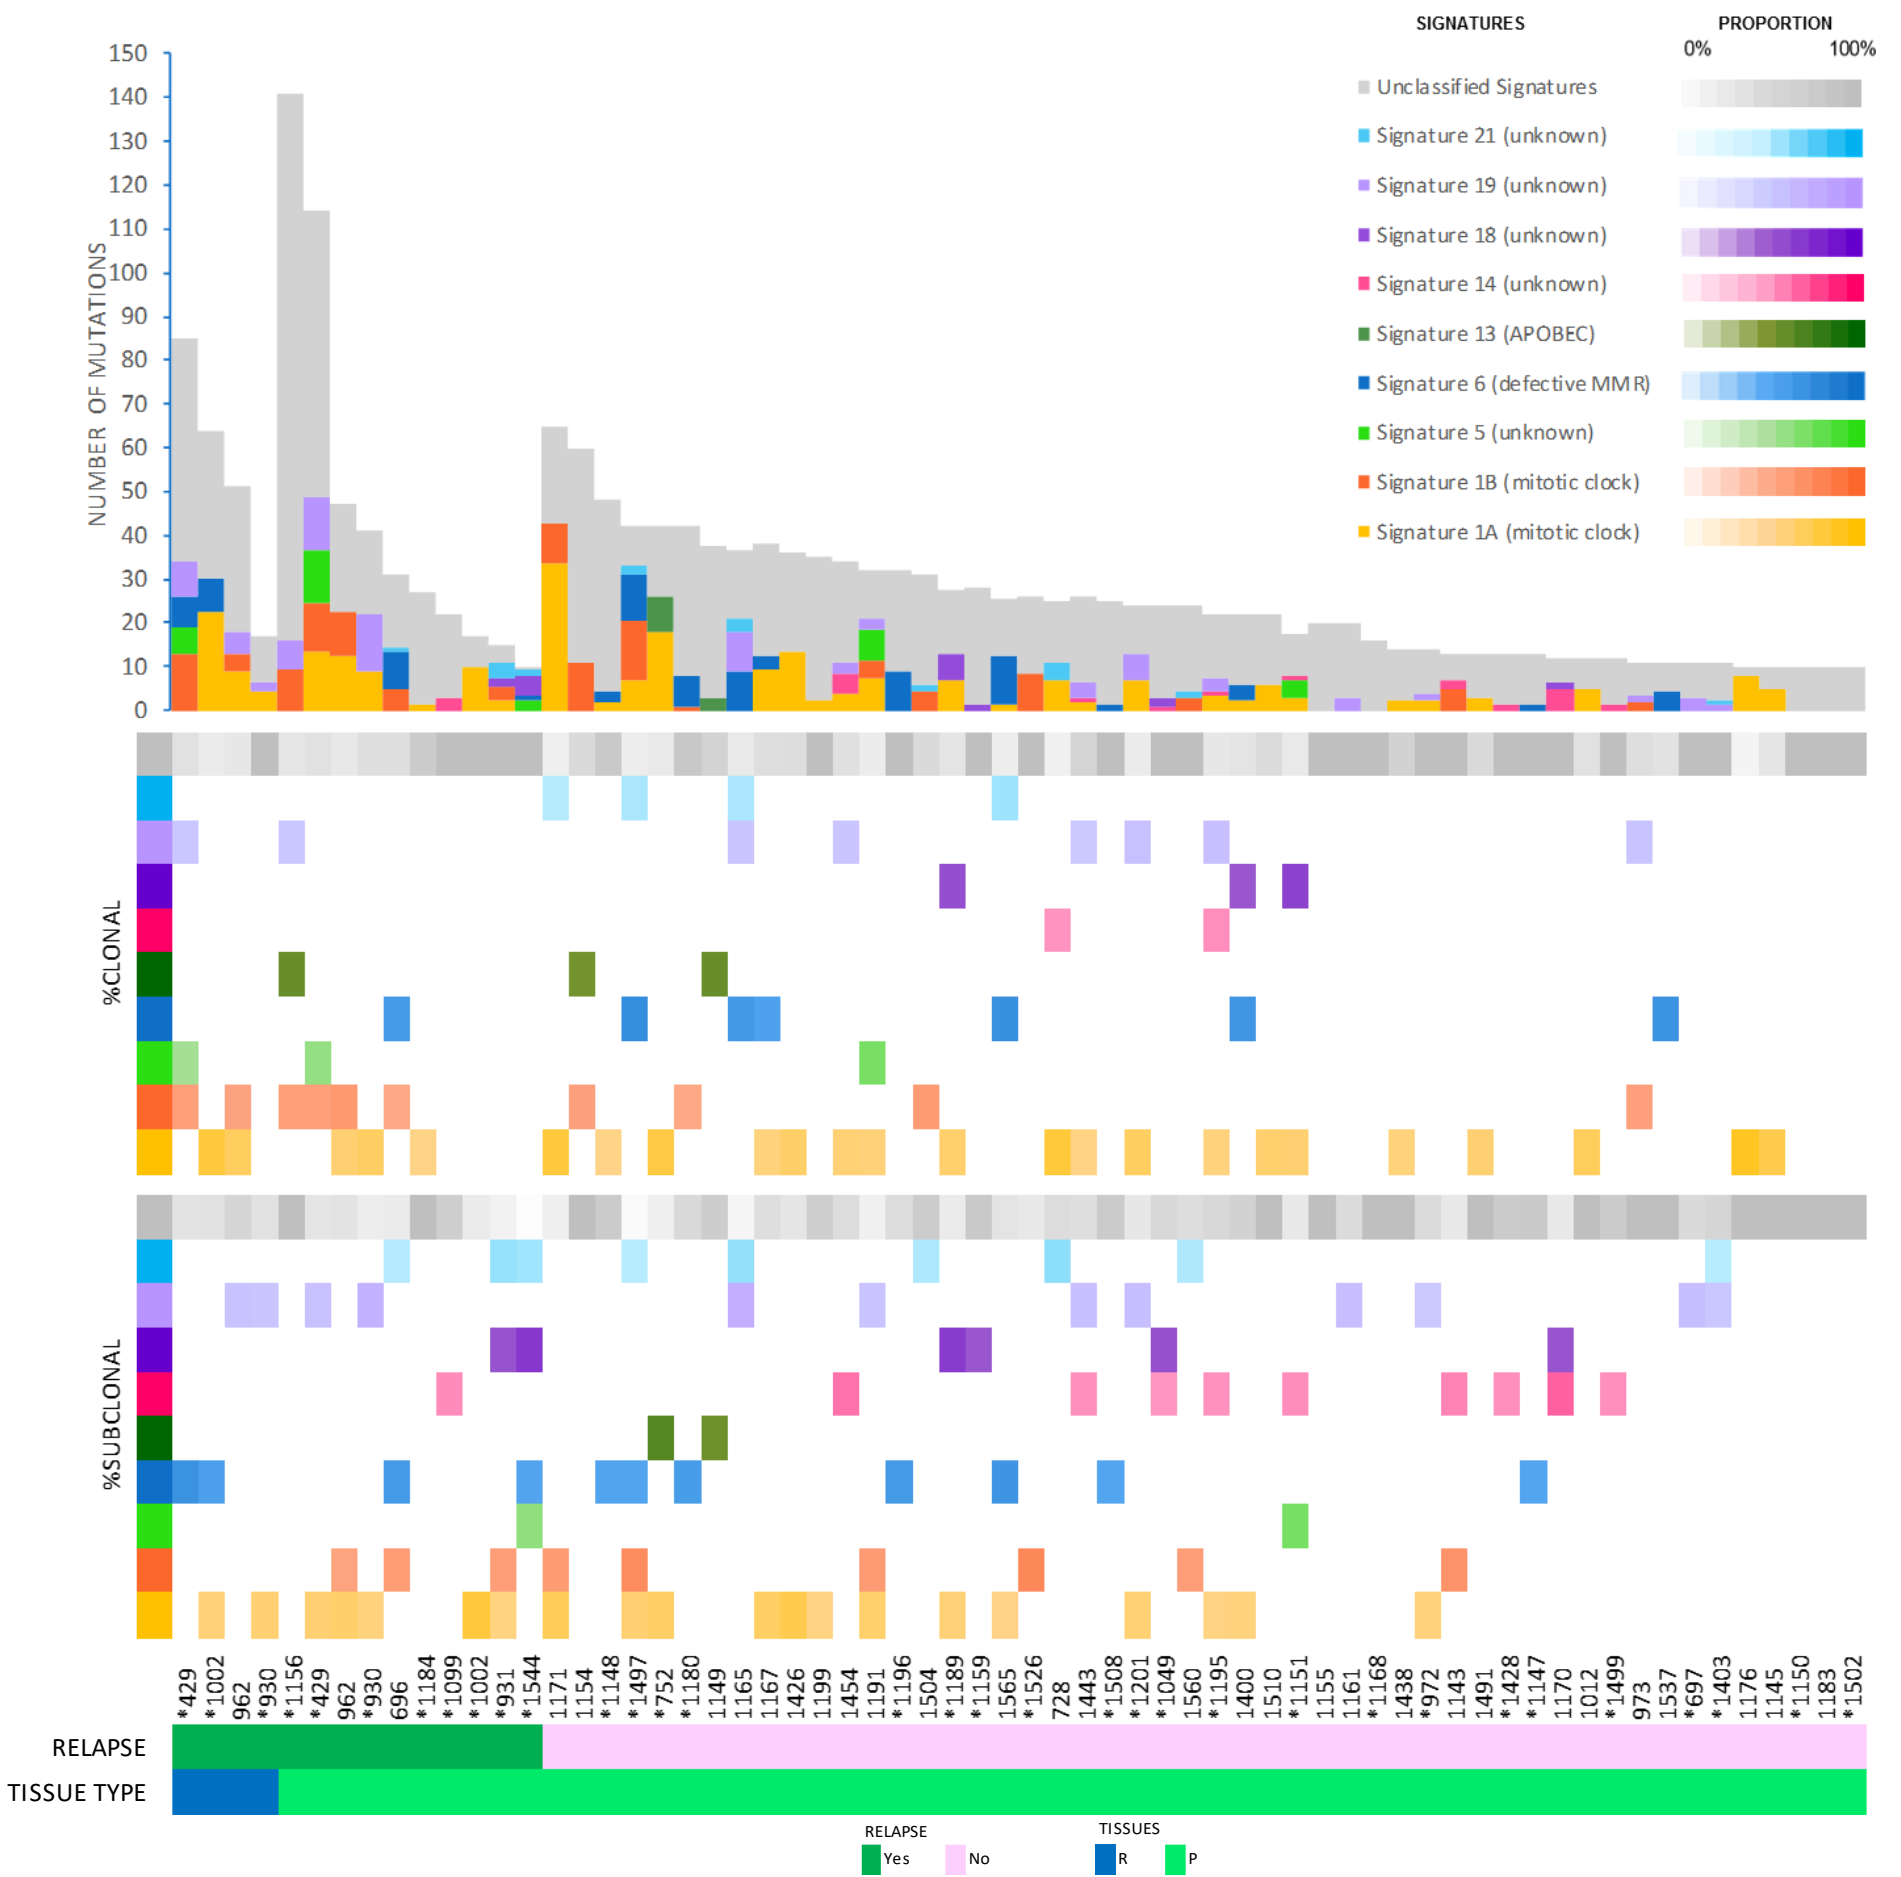

**Figure S7: Mutational Signatures in PTC Cohort and Role in PTC Evolution.** Significant mutational signatures identified in PTC cohort, split according to , relapse, tissue type (R=Relapsed tissue; P=Primary tissue) and proportion of clonality (more intense color represents higher proportion). Asterisk (\*) represents samples with high number of subclonal mutations (median, 41%).

## A Primary PTC with Relapse

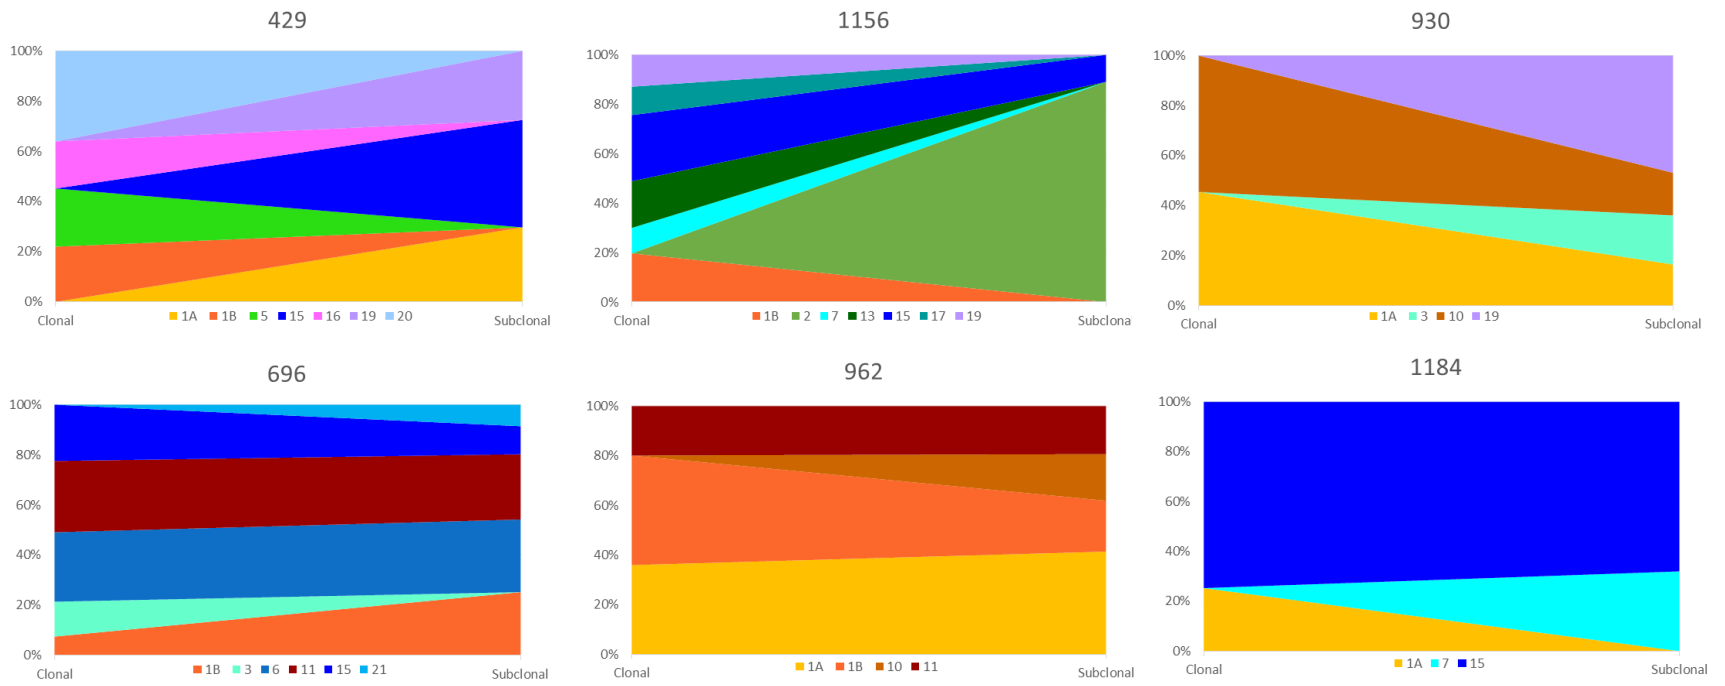

## B Primary PTC without Relapse

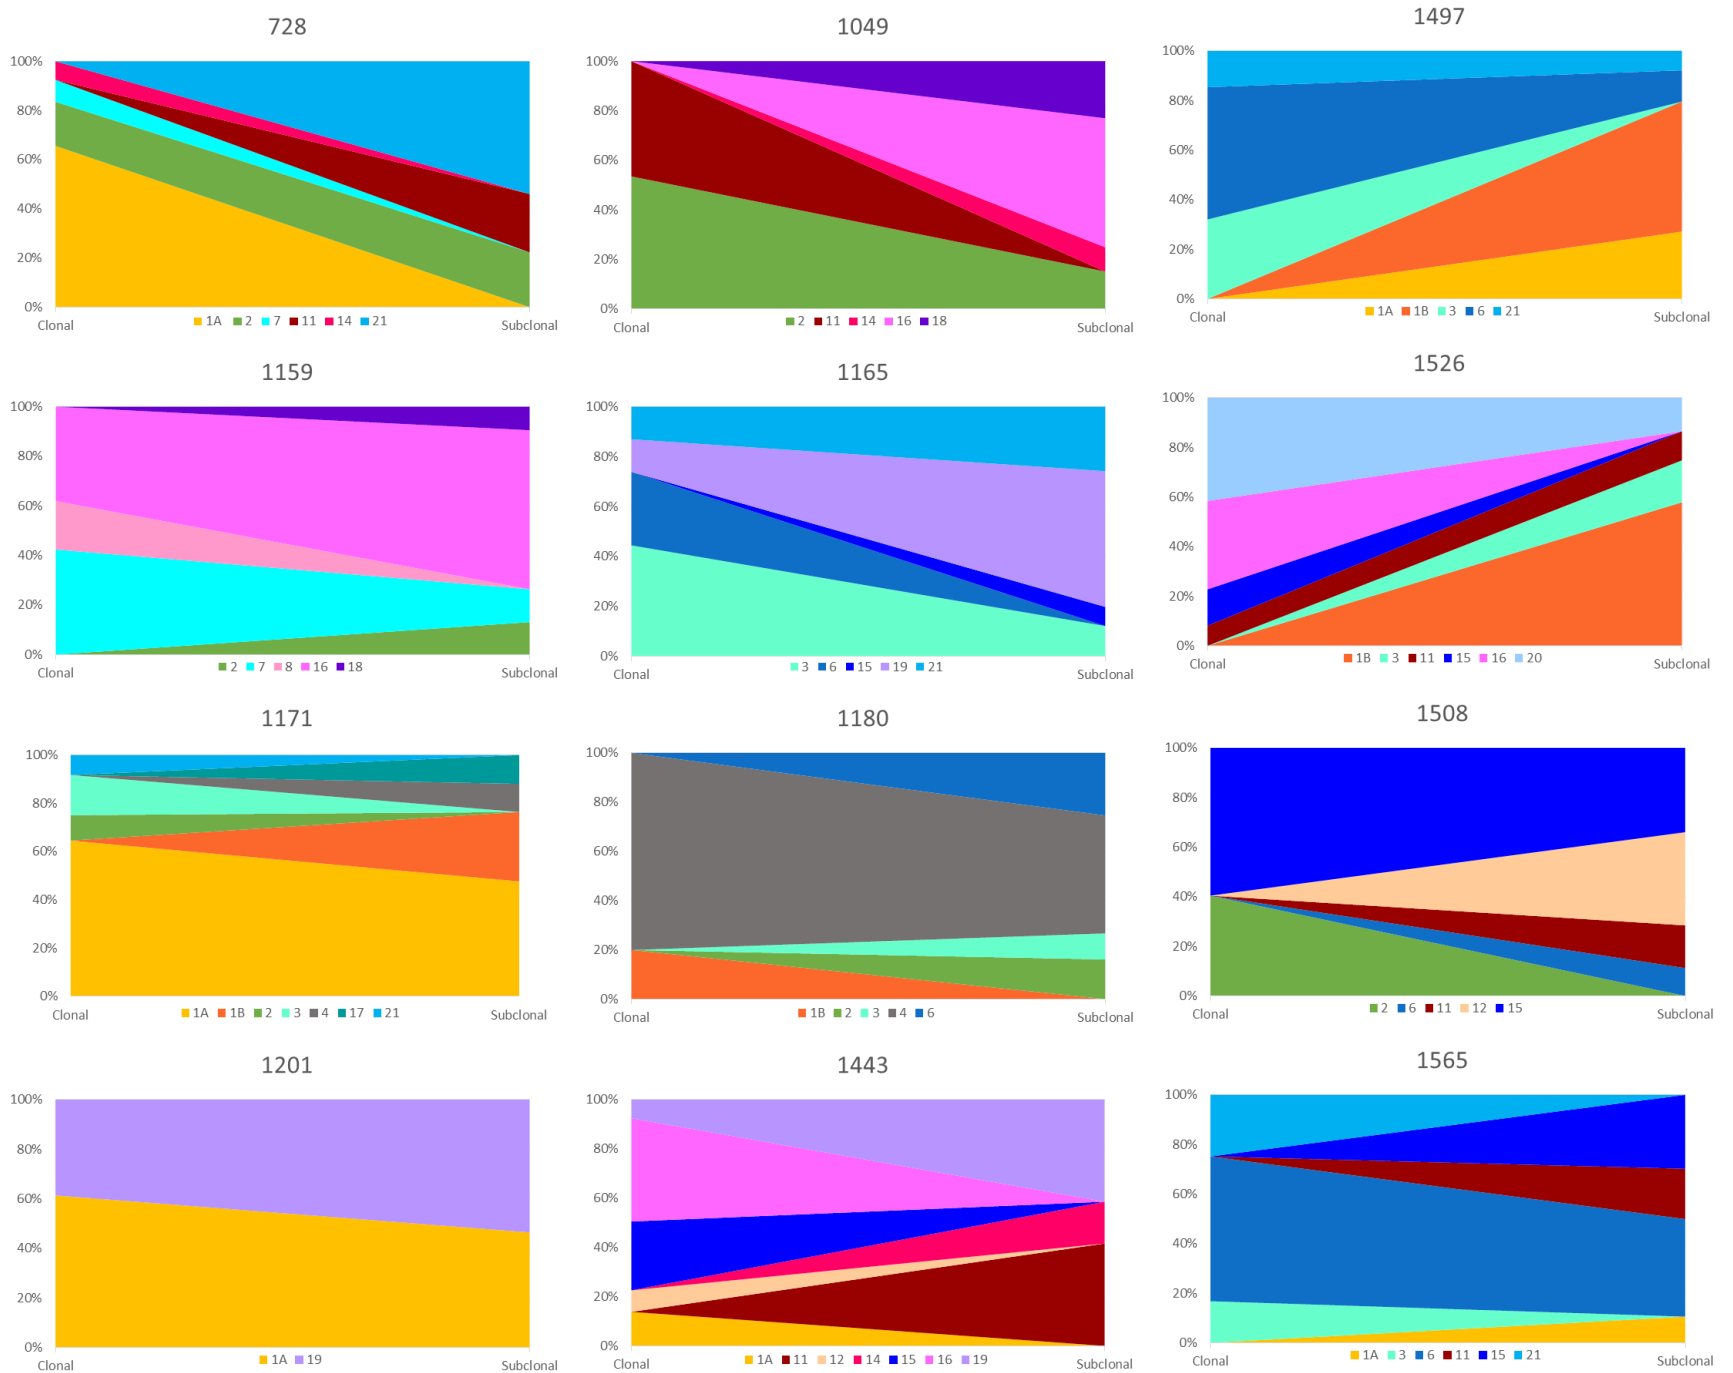



## A Primary PTC with Relapse

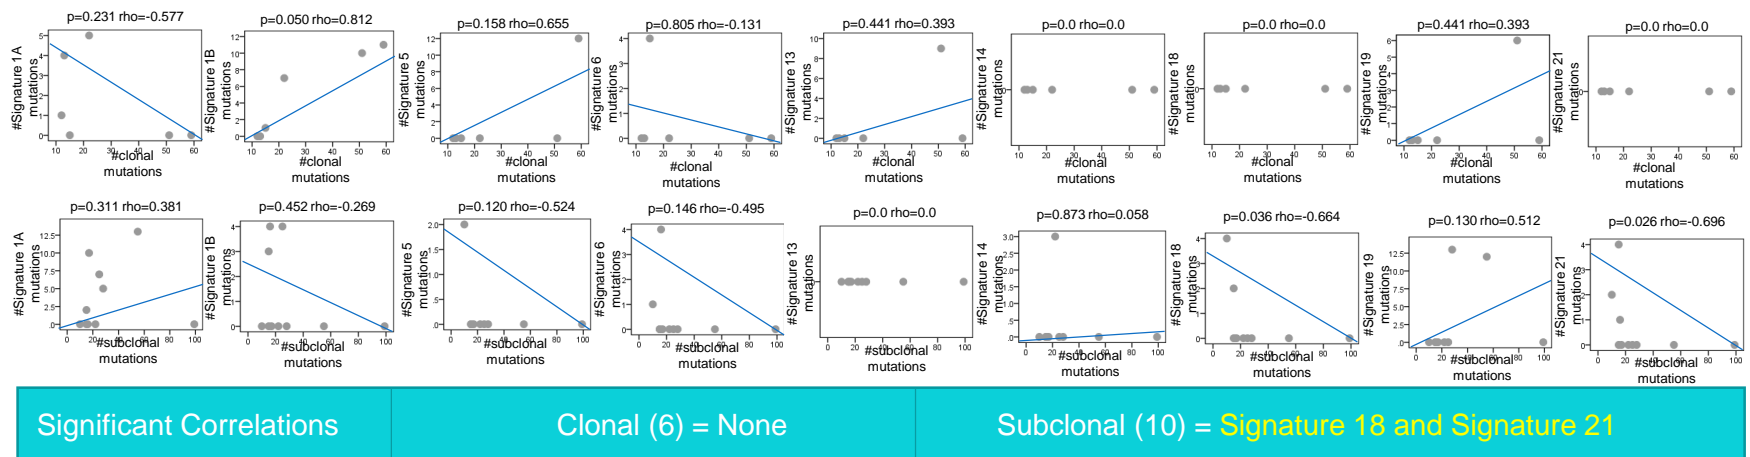

## B Primary PTC without Relapse

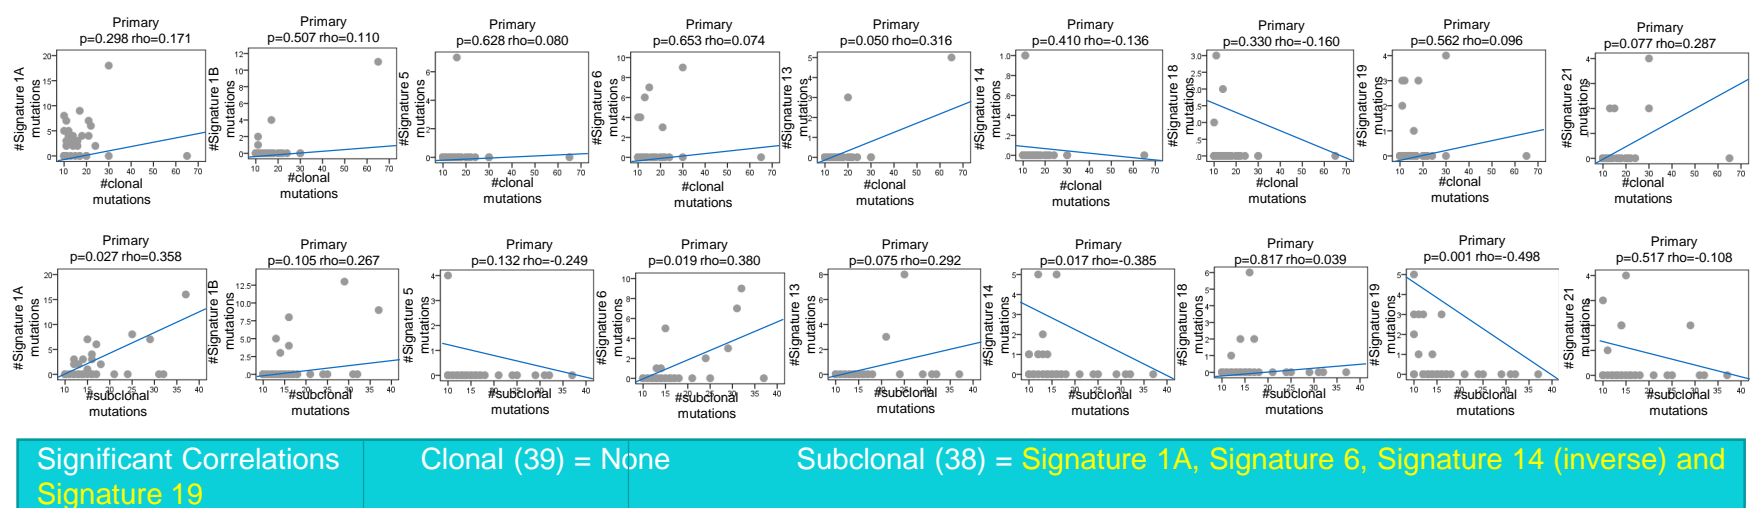

## C Overall Primary

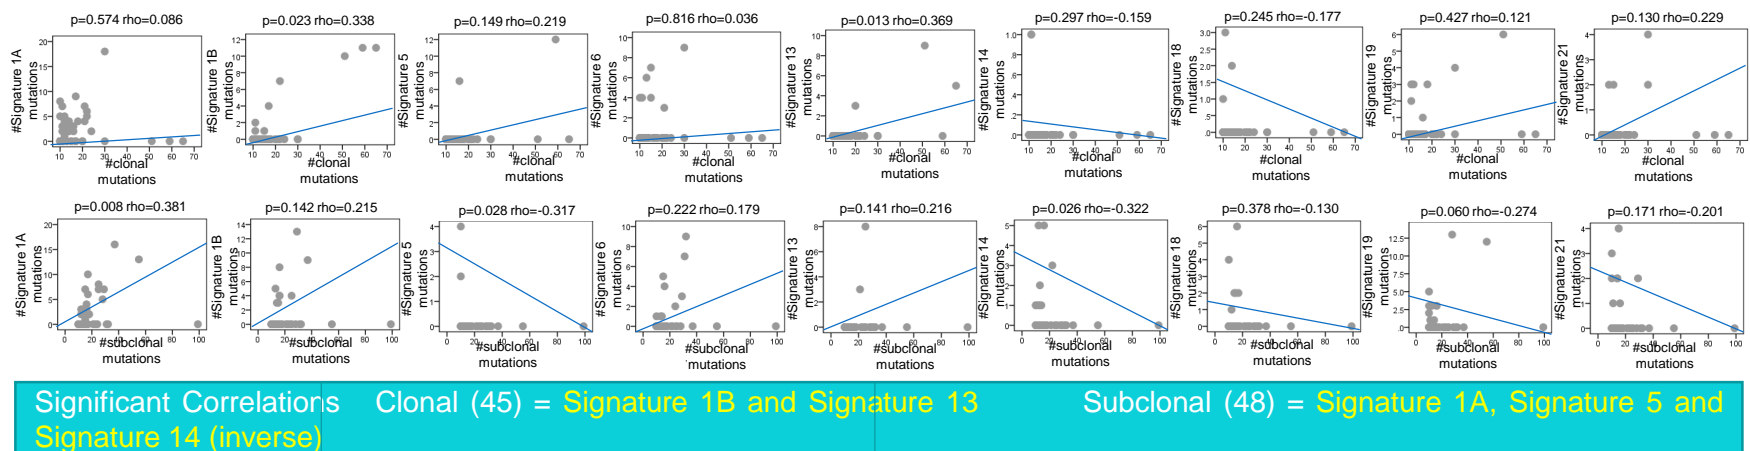

**Figure S9 : Correlation of prevalence of mutational signatures in primary PTC tumors with relapse (A), primary PTC tumors (B) and in all primary PTC tissues, regardless of relapse (C). Significance from Spearman's rank correlation is indicated. A summary of the significant correlations are shown below each panel.**

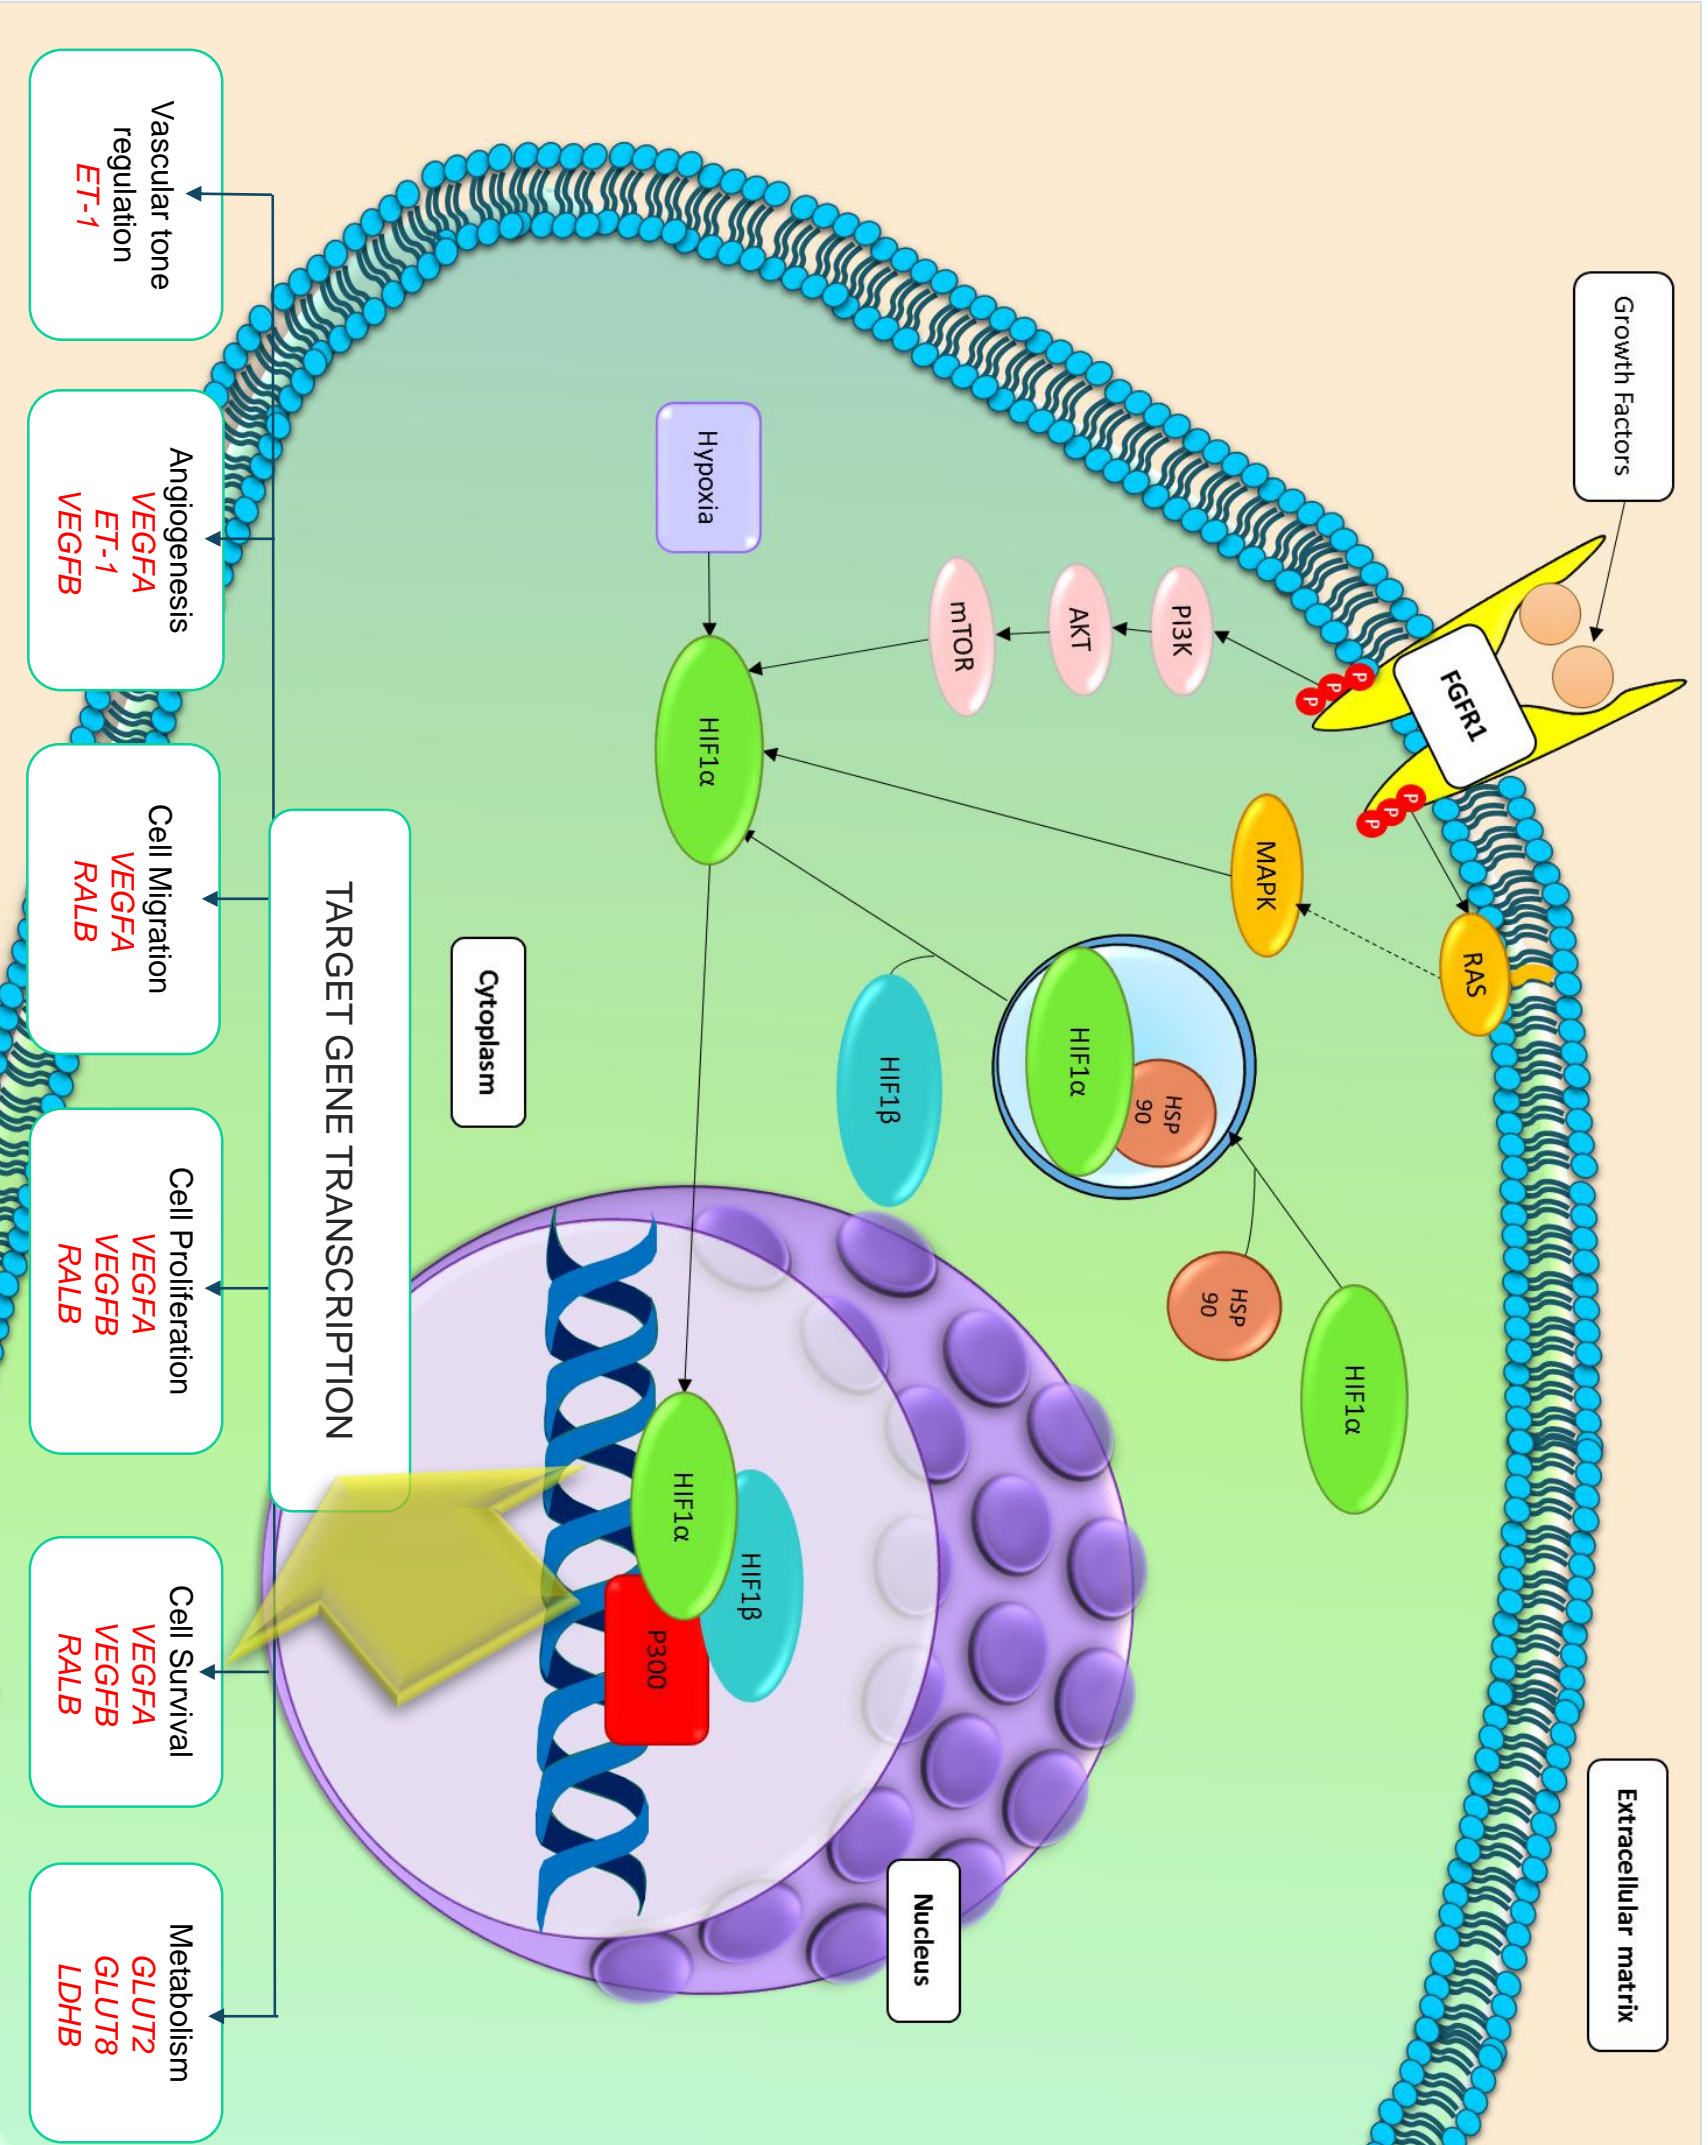

**Figure S10: HIF1α pathway in PTC cancer progression.**

Schematic of HIF1α positive regulatory genes and their effects on PTC progression. HIF1α signaling transduction causing downstream target gene transcription (summarized in the grey panel below) contributes to tumor progression via cell survival, proliferation and migration; metabolism; angiogenesis and vascular tone regulation. *FGFR1*, fibroblast growth factor receptor-1; P, phosphorylated; *PI3K* (*PIK3CA*, *PIK3CG*), phosphoinositide 3-kinase; *AKT*, AKT serine/threonine kinase; *mTOR*, mechanistic target of rapamycin kinase; *RAS* (*HRAS*), *RAS* proto-oncogene, GTPase; *MAPK* (*MAPK4*, *MAPK9*), mitogen-activated protein kinase; *HIF1α*, hypoxia-inducible factor 1-alpha; *HIF1β*, hypoxia-inducible factor 1-beta; *HSP90* (*HSP90AA1*), heat shock protein 90; *p300* (*EP300*), histone acetyltransferase *p300*; *ET-1* (*EDN1*), endothelin 1; *VEGF* (*VEGFA*, *VEGFB*), vascular endothelial growth factor; *GLUT* (*SCL2A2/GLUT2*; *SCL2A8/GLUT8*), solute carrier family 2 facilitated glucose transporter; *LDH* (*LDHB*), lactate dehydrogenase.

**Table S1. Summary of clinical and pathological characteristics of the PTC cohort (n=79)**

| Clinico-pathological characteristics     | Number of cases, n(%) |
|------------------------------------------|-----------------------|
| Median age at diagnosis (range) in years | 33 (25-42)            |
| <b>Gender</b>                            |                       |
| Male                                     | 15 (19.0)             |
| Female                                   | 64 (81.0)             |
| <b>Histological subtype</b>              |                       |
| Classical variant                        | 42 (53.2)             |
| Follicular variant                       | 17 (21.5)             |
| Tall Cell variant                        | 11 (13.9)             |
| Other variants                           | 9 (11.4)              |
| <b>Extra-thyroidal extention</b>         |                       |
| Present                                  | 29 (36.7)             |
| Absent                                   | 50 (63.3)             |
| <b>Lymphovascular invasion</b>           |                       |
| Present                                  | 28 (41.2)             |
| Absent                                   | 40 (58.8)             |
| <b>Margin involvement</b>                |                       |
| Present                                  | 28 (38.9)             |
| Absent                                   | 44 (61.1)             |
| <b>pT</b>                                |                       |
| T1                                       | 19 (24.1)             |
| T2                                       | 21 (26.6)             |
| T3                                       | 37 (46.8)             |
| T4                                       | 2 (2.5)               |
| <b>pN</b>                                |                       |
| N0                                       | 39 (50.6)             |
| N1                                       | 38 (49.4)             |
| <b>pM</b>                                |                       |
| M0                                       | 75 (94.9)             |
| M1                                       | 4 (5.1)               |
| <b>Stage</b>                             |                       |
| I                                        | 71 (89.9)             |
| II                                       | 8 (10.1)              |

**Table S5: Multivariate analysis for Mutation –Disease-free survival (17 events among 79 patients)**

| <b>Factor</b>             | <b>Adjusted hazard ratio (95% CI)</b> | <b>p-value</b> |
|---------------------------|---------------------------------------|----------------|
| Age                       | 0.988 (0.937-1.041)                   | 0.642          |
| Gender                    | 0.587 (0.180-1.916)                   | 0.377          |
| Stage                     | 0.298 (0.074-1.199)                   | 0.088          |
| Extra thyroidal Extension | 1.585 (0.552-4.549)                   | 0.392          |
| Tumor size                | 1.258 (0.947-1.670)                   | 0.113          |
| Mutation                  | 3.623 (1.096-11.973)                  | 0.035          |

**Table S6: Association of clinico-pathological characteristics with subclonal mutations in PTC (n=79)**

|                                 | Total |      | High Subclonal mutations |       | Low subclonal mutations |      | p value |
|---------------------------------|-------|------|--------------------------|-------|-------------------------|------|---------|
|                                 | No.   | %    | No.                      | %     | No.                     | %    |         |
| <b>No. of patients</b>          | 79    |      | 38                       | 48.1  | 41                      | 51.9 |         |
| <b>Age (Yrs)</b>                |       |      |                          |       |                         |      |         |
| ≤ 45                            | 69    | 87.3 | 35                       | 50.7  | 34                      | 49.3 | 0.214   |
| > 45                            | 10    | 12.7 | 3                        | 30.0  | 7                       | 70.0 |         |
| <b>Sex</b>                      |       |      |                          |       |                         |      |         |
| Female                          | 64    | 81.0 | 32                       | 50.0  | 32                      | 50.0 | 0.484   |
| Male                            | 15    | 19.0 | 6                        | 40.0  | 9                       | 60.0 |         |
| <b>Extrathyroidal extension</b> |       |      |                          |       |                         |      |         |
| Absent                          | 50    | 63.3 | 25                       | 50.0  | 25                      | 50.0 | 0.657   |
| Present                         | 29    | 36.7 | 13                       | 44.8  | 16                      | 55.2 |         |
| <b>Surgical Margins</b>         |       |      |                          |       |                         |      |         |
| Absent                          | 44    | 61.1 | 22                       | 50.0  | 22                      | 50.0 | 1.000   |
| Present                         | 28    | 38.9 | 14                       | 50.0  | 14                      | 50.0 |         |
| <b>pT</b>                       |       |      |                          |       |                         |      |         |
| T1                              | 19    | 24.1 | 12                       | 63.2  | 7                       | 36.8 | 0.458   |
| T2                              | 21    | 26.6 | 10                       | 47.6  | 11                      | 52.4 |         |
| T3                              | 37    | 46.8 | 15                       | 40.5  | 22                      | 59.5 |         |
| T4                              | 2     | 2.5  | 1                        | 50.0  | 1                       | 50.0 |         |
| <b>pN</b>                       |       |      |                          |       |                         |      |         |
| pN0                             | 39    | 50.6 | 17                       | 43.6  | 22                      | 56.4 | 0.427   |
| pN1                             | 38    | 49.4 | 20                       | 52.6  | 18                      | 47.4 |         |
| <b>pM</b>                       |       |      |                          |       |                         |      |         |
| pM0                             | 75    | 94.9 | 34                       | 45.3  | 41                      | 54.7 | 0.014   |
| pM1                             | 4     | 5.1  | 4                        | 100.0 | 0                       | 0.0  |         |
| <b>Stage</b>                    |       |      |                          |       |                         |      |         |
| I                               | 71    | 89.9 | 34                       | 47.9  | 37                      | 52.1 | 0.910   |
| II                              | 8     | 10.1 | 4                        | 50.0  | 4                       | 50.0 |         |
| <b>Histology Type</b>           |       |      |                          |       |                         |      |         |
| Classical variant               | 42    | 53.2 | 22                       | 52.4  | 20                      | 47.6 | 0.642   |
| Follicular Variant              | 17    | 21.5 | 6                        | 35.3  | 11                      | 64.7 |         |
| Tall Cell Variant               | 11    | 13.9 | 6                        | 54.5  | 5                       | 45.5 |         |
| Other variants                  | 9     | 11.4 | 4                        | 44.4  | 5                       | 55.6 |         |
| <b>Recurrence</b>               |       |      |                          |       |                         |      |         |
| Yes                             | 17    | 21.5 | 13                       | 76.5  | 4                       | 23.5 | 0.005   |
| No                              | 62    | 78.5 | 25                       | 40.3  | 37                      | 59.7 |         |
| <b>HIF-1α IHC</b>               |       |      |                          |       |                         |      |         |
| High                            | 52    | 66.7 | 29                       | 55.8  | 23                      | 44.3 | 0.076   |
| Low                             | 26    | 33.3 | 9                        | 34.6  | 17                      | 65.4 |         |
| <b>Disease-free survival</b>    |       |      |                          | 60.6  |                         | 92.5 | 0.010   |



**Table S9: Association of clinico-pathological characteristics with HIF-1 $\alpha$  expression in PTC**

|                                 | Total |      | HIF-1 $\alpha$ High (>20%) |      | HIF-1 $\alpha$ normal ( $\leq$ 20%) |      | p value |
|---------------------------------|-------|------|----------------------------|------|-------------------------------------|------|---------|
|                                 | No.   | %    | No.                        | %    | No.                                 | %    |         |
| <b>No. of patients</b>          | 1231  |      | 843                        | 68.5 | 388                                 | 31.5 |         |
| <b>Age (Yrs)</b>                |       |      |                            |      |                                     |      |         |
| $\leq$ 45                       | 787   | 64.3 | 494                        | 62.8 | 293                                 | 37.2 | <0.001  |
| > 45                            | 436   | 35.7 | 349                        | 80.0 | 87                                  | 20.0 |         |
| <b>Sex</b>                      |       |      |                            |      |                                     |      |         |
| Female                          | 927   | 75.8 | 635                        | 68.5 | 292                                 | 31.5 | 0.566   |
| Male                            | 296   | 24.2 | 208                        | 70.3 | 88                                  | 29.7 |         |
| <b>Extrathyroidal extension</b> |       |      |                            |      |                                     |      |         |
| Absent                          | 519   | 49.2 | 347                        | 66.9 | 172                                 | 33.1 | 0.027   |
| Present                         | 535   | 50.8 | 391                        | 73.1 | 144                                 | 26.9 |         |
| <b>Surgical Margins</b>         |       |      |                            |      |                                     |      |         |
| Absent                          | 346   | 51.7 | 232                        | 67.0 | 114                                 | 33.0 | 0.904   |
| Present                         | 323   | 48.3 | 218                        | 67.5 | 105                                 | 32.5 |         |
| <b>pT</b>                       |       |      |                            |      |                                     |      |         |
| T1                              | 322   | 27.1 | 232                        | 72.0 | 90                                  | 28.0 | 0.115   |
| T2                              | 248   | 20.9 | 162                        | 65.3 | 86                                  | 34.7 |         |
| T3                              | 507   | 42.7 | 346                        | 68.2 | 161                                 | 31.8 |         |
| T4                              | 110   | 9.3  | 84                         | 76.4 | 26                                  | 23.6 |         |
| <b>pN</b>                       |       |      |                            |      |                                     |      |         |
| pN0                             | 473   | 42.7 | 340                        | 71.9 | 133                                 | 28.1 | 0.179   |
| pN1                             | 634   | 57.3 | 432                        | 68.1 | 202                                 | 31.9 |         |
| <b>pM</b>                       |       |      |                            |      |                                     |      |         |
| pM0                             | 1097  | 95.1 | 757                        | 69.0 | 340                                 | 31.0 | 0.118   |
| pM1                             | 56    | 4.9  | 44                         | 78.6 | 12                                  | 21.4 |         |
| <b>Stage</b>                    |       |      |                            |      |                                     |      |         |
| I                               | 822   | 69.0 | 528                        | 64.2 | 294                                 | 35.8 | <0.001  |
| II                              | 57    | 4.8  | 39                         | 68.4 | 18                                  | 31.6 |         |
| III                             | 108   | 9.1  | 81                         | 75.0 | 27                                  | 25.0 |         |
| IV                              | 204   | 17.1 | 176                        | 86.3 | 28                                  | 13.7 |         |
| <b>Histology Type</b>           |       |      |                            |      |                                     |      |         |
| Classical variant               | 865   | 70.2 | 601                        | 69.5 | 264                                 | 30.5 | 0.158   |
| Follicular Variant              | 193   | 15.7 | 128                        | 66.3 | 65                                  | 33.7 |         |
| Tall Cell Variant               | 97    | 7.9  | 70                         | 72.2 | 27                                  | 27.8 |         |
| Other variants                  | 76    | 6.2  | 44                         | 57.9 | 32                                  | 42.1 |         |
| <b>Disease-free survival</b>    |       |      |                            | 73.6 |                                     | 81.3 | 0.037   |
